# Supplementary material for: Identification of TAZ-Dependent Breast Cancer Vulnerabilities Using a Chemical Genomics Screening Approach
Source: Frontiers journal article supplement (doi:10.3389/fcell.2021.673374), 2021-06-15
Supplement: Data_Sheet_1.pdf [file Data_Sheet_1.pdf]

## Identification of TAZ-dependent breast cancer vulnerabilities using a chemical genomics screening approach

He Shen<sup>1</sup>, Yanmin Chen<sup>1</sup>, Yin Wan<sup>1</sup>, Tao Liu<sup>2</sup>, Jianmin Wang<sup>2</sup>, Yali Zhang<sup>2</sup>, Lei Wei<sup>2</sup>, Qiang Hu<sup>2</sup>, Bo Xu<sup>3</sup>, Mikhail Chernov<sup>4</sup>, Costa Frangou<sup>5\*</sup> and Jianmin Zhang<sup>1\*</sup>

### Supplemental Material

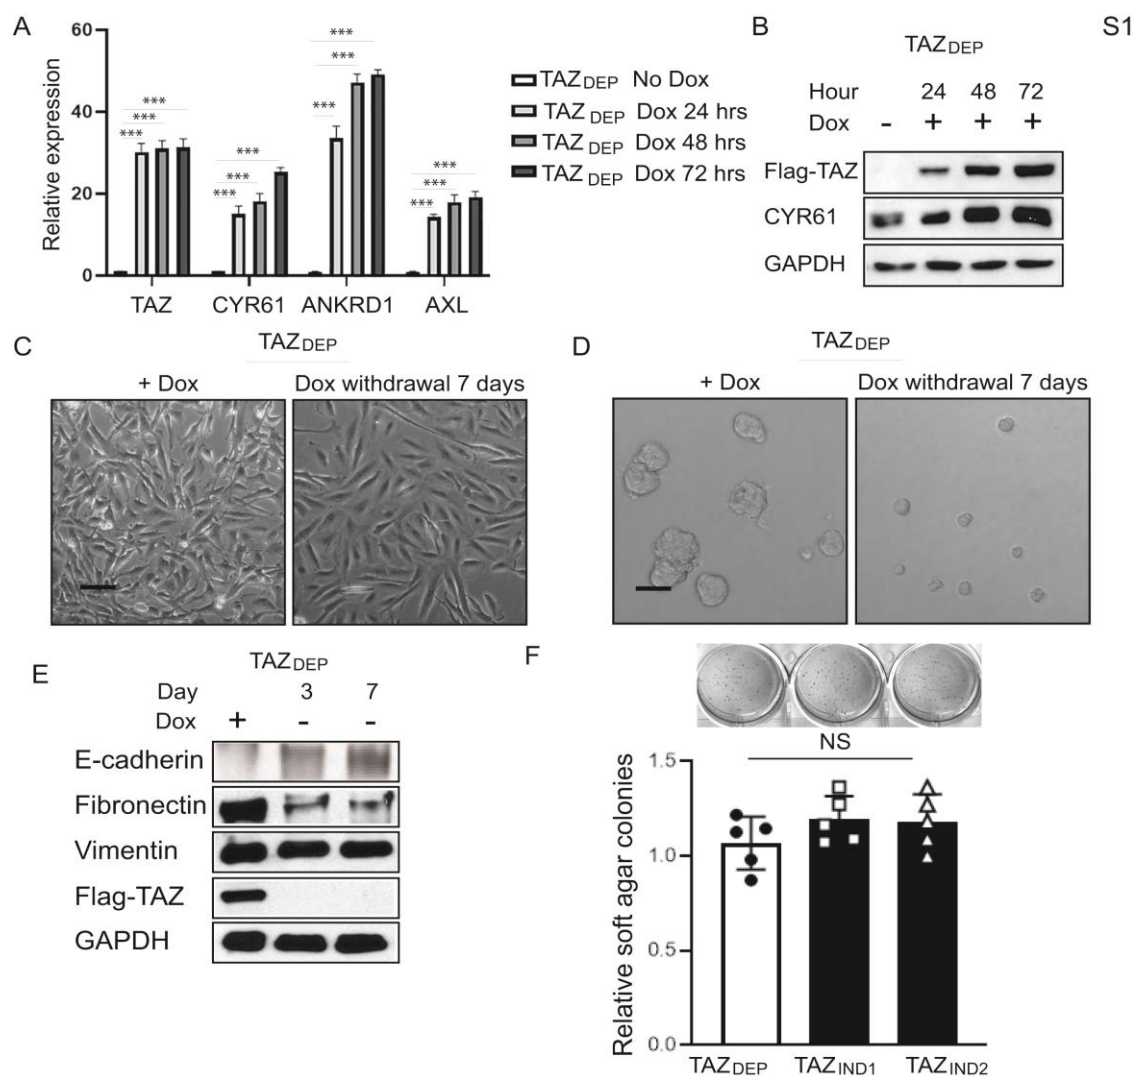

**Figure S1 Dox withdrawal inhibits TAZ<sub>DEP</sub> cell proliferation**

- A.** qRT-PCR experiment detection of TAZ, CYR61, ANKRD1 and AXL expression in TAZ<sub>DEP</sub> cells in response to dox treatment. Relative expression was normalized by GAPDH expression. Unpaired two-tailed student t-test: \*\*\* p<0.001
- B.** Immunoblotting detection of CYR61 in response to dox treatment in TAZ<sub>DEP</sub> cells. GAPDH was used as a loading control.

- C. Representative images of TAZ<sub>DEP</sub> cell morphology in a 2D culture under the condition of Dox treatment or Dox withdrawal. TAZ<sub>DEP</sub> cells grown in the presence of 2 µg/ml dox. Scale bar=50 µm.
- D. Representative images of TAZ<sub>DEP</sub> cell morphology in a 3D culture under the condition of Dox treatment or Dox withdrawal. TAZ<sub>DEP</sub> cells grown in the presence of 2 µg/ml dox. Scale bar=50 µm.
- E. Representative images and quantification of colony formation in soft agar of TAZ<sub>DEP</sub> and TAZ<sub>IND</sub> cells. Data are shown as the mean ± SD. Unpaired two-tailed student t-test: NS=not significant.

A

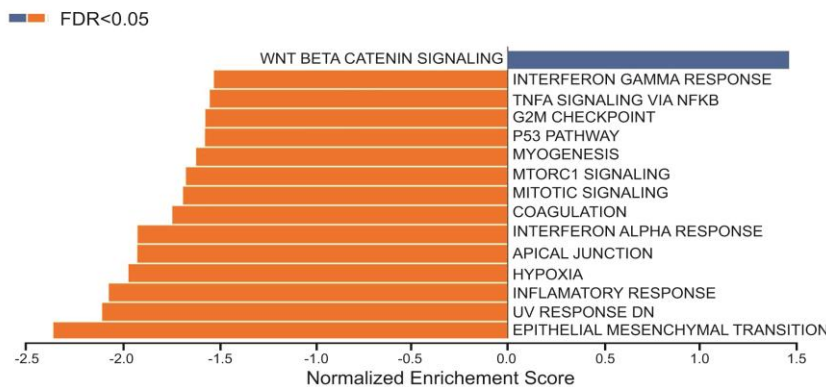

B

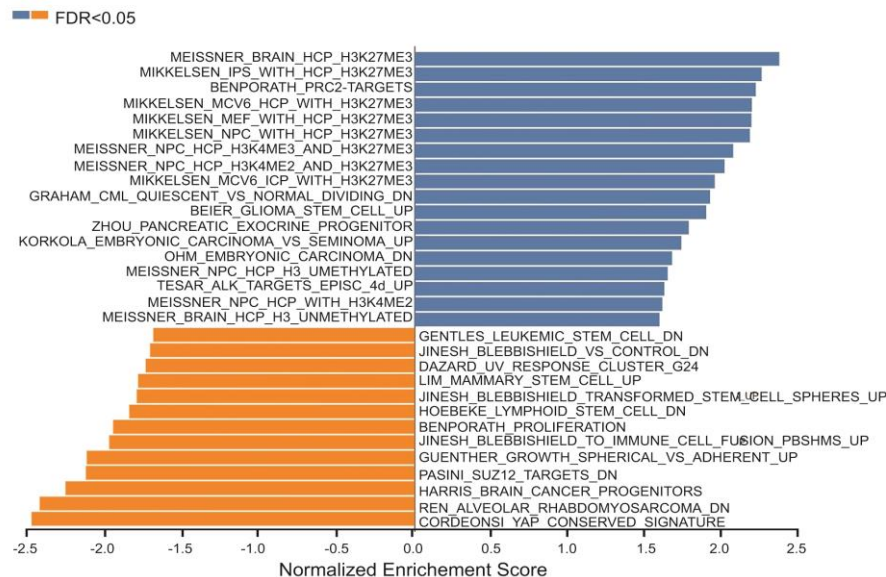

**Figure S2 KEGG and GO term analysis of TAZ<sub>DEP</sub> and TAZ<sub>IND</sub> enriched pathways.**

A. KEGG analysis for pathway alterations in TAZ<sub>DEP</sub> and TAZ<sub>IND</sub> cells.

B. GO term analysis identified enrichment biological processes in TAZ<sub>DEP</sub> and TAZ<sub>IND</sub> cells.

## TAZ-dependent breast cancer vulnerabilities

TAZ<sub>DEP</sub> enriched

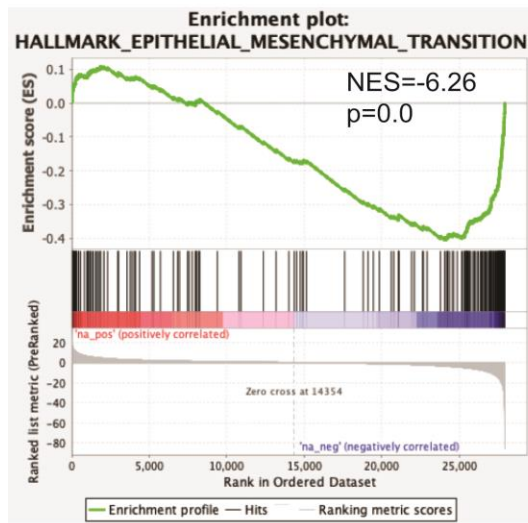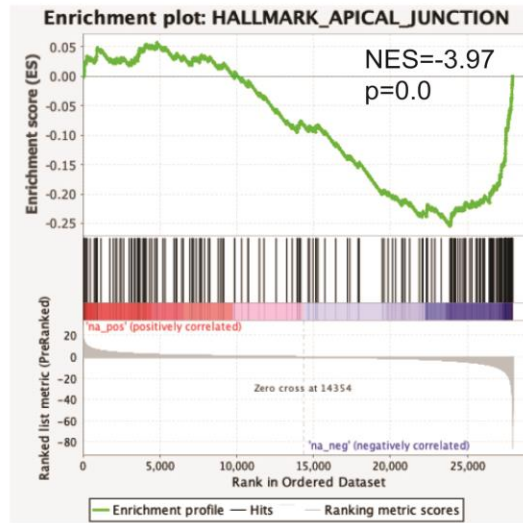

TAZ<sub>IND</sub> enriched

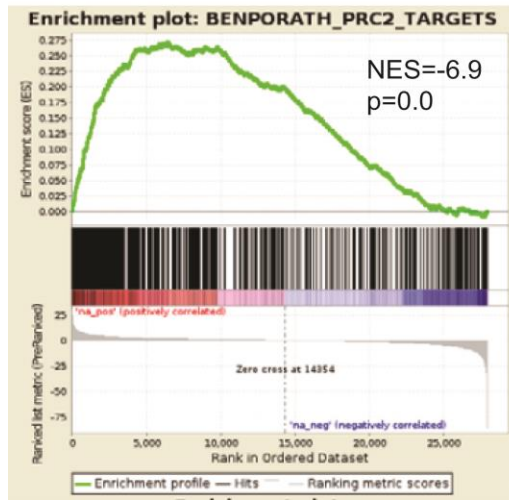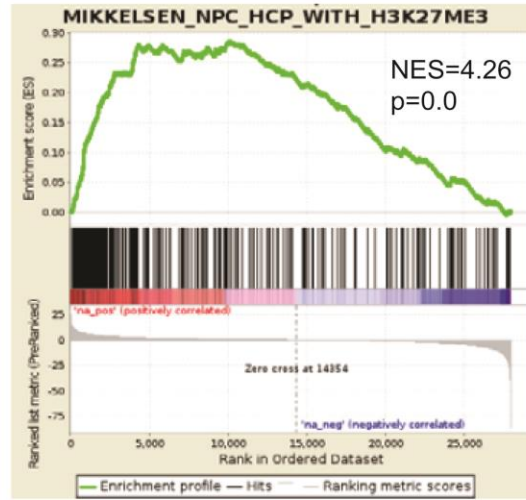

Figure S3 GSEA analysis of TAZ<sub>DEP</sub> and TAZ<sub>IND</sub> enriched pathways.

### Supplemental Tables

Table-S1 Genetically characterization of TAZ<sub>DEP</sub> and TAZ<sub>IND</sub> cells.

Table-S2 Differential expression gene changes of TAZ<sub>IND</sub> versus TAZ<sub>DEP</sub> cells.

Table-S3 List of ~600 compounds library.

**Table-S4 List of TAZ<sub>DEP</sub> cells sensitive compounds.**
