# Supplementary material for: Identification of TAZ-Dependent Breast Cancer Vulnerabilities Using a Chemical Genomics Screening Approach
Source: Front Cell Dev Biol. 2021 Jun 15;9:673374. doi: 10.3389/fcell.2021.673374 (PMC8239392; doi:10.3389/fcell.2021.673374)
Supplement: Supplementary file 1 [file Table_1.XLSX]

## Sheet: Structural Variant Analysis
GENE SYMBOL	MUTATION	AA VARIANT	FUNC. IMPACT	FI SCORE	VC SCORE	VS SCORE	UNIPROT	REFSEQ	GAPS IN MSA	MSA HEIGHT	CODON START POSITION	UNIPROT POSITION	UNIPROT RESIDUE	REFSEQ POSITION	REFSEQ RESIDUE	FUNC. REGION	PROTEIN BIND.SITE	DNA/RNA BIND.SITE	SMALL.MOL BIND.SITE	N.COSMIC	N.SNPS	MUTATIONS IN COSMIC@POSITION	CANCER TYPES IN COSMIC@POSITION	REGIONS@POSITION	DOMAIN@POSITION	DOMAINS
AGL	GDE_HUMAN W1520C	W1520C	high	4.1	5.26	2.94	GDE_HUMAN	NP_000019	0.04	205	hg19:chr1:100387166	1520	W	1520	W					134	225				PF06202 // Amylo-alpha-1,6-glucosidase // 1044 // 1527	Amylo-alpha-1,6-glucosidase /// N-terminal domain from the human glycogen debranching enzyme /// glucanotransferase domain of human glycogen debranching enzyme /// central domain of human glycogen debranching enzyme
DDX54	DDX54_HUMAN R377L	R377L	high	4.76	6.48	3.04	DDX54_HUMAN	NP_076977	0	681	hg19:chr12:113610306	377	R	377	R		1	1		82	181			DOMAIN // 326 // 473 // Helicase C-terminal.	PF00271 // Helicase conserved C-terminal domain // 356 // 433	DEAD/DEAH box helicase /// Helicase conserved C-terminal domain /// DBP10CT (NUC160) domain
DNAH9	DYH9_HUMAN D4104Y	D4104Y	high	3.96	4.49	3.43	DYH9_HUMAN	NP_001363	0	460	hg19:chr17:11837209	4104	D	4104	D		1			647	602				PF03028 // Dynein heavy chain and region D6 of dynein motor // 3782 // 4485	Dynein heavy chain and region D6 of dynein motor /// AAA domain (dynein-related subfamily) /// Dynein heavy chain, N-terminal region 1 /// Dynein heavy chain, N-terminal region 2 /// Hydrolytic ATP binding site of dynein motor region D1 /// P-loop containing dynein motor region D3 /// Microtubule-binding stalk of dynein motor /// P-loop containing dynein motor region D4 /// ATP-binding dynein mot…
LMF1	LMF1_HUMAN H263Y	H263Y	high	3.93	4.86	3	LMF1_HUMAN	NP_073610	0.03	192	hg19:chr16:929678	263	H	263	H					44	150			TOPO_DOM // 222 // 292 // Lumenal (Potential).	PF06762 // Lipase maturation factor // 169 // 551	Lipase maturation factor
LNX1	LNX1_HUMAN A417T	A417T	high	3.78	5.08	2.48	LNX1_HUMAN	NP_116011	0	679	hg19:chr4:54362289	417	A	321	A		1			78	118			DOMAIN // 381 // 464 // PDZ 2.	PF00595 // PDZ domain (Also known as DHR or GLGF) // 381 // 461	Zinc finger, C3HC4 type (RING finger) /// PDZ domain (Also known as DHR or GLGF)
PCDHA13	PCDAD_HUMAN D159N	D159N	high	5.215	6.9	3.53	PCDAD_HUMAN	NP_061727	0	1005	hg19:chr5:140262328	159	D	159	D					193	143			TOPO_DOM // 30 // 697 // Extracellular (Potential). /// DOMAIN // 134 // 242 // Cadherin 2.	PF00028 // Cadherin domain // 138 // 233	/// Cadherin domain /// Cadherin-like
PCDHGA5	PCDG5_HUMAN L440F	L440F	high	3.68	4.1	3.26	PCDG5_HUMAN	NP_061741	0	578	hg19:chr5:140745215	440	L	440	L					90	133			TOPO_DOM // 30 // 692 // Extracellular (Potential). /// DOMAIN // 348 // 452 // Cadherin 4.	PF00028 // Cadherin domain // 352 // 443	Cadherin domain /// Cadherin-like
PLS3	PLST_HUMAN R503T	R503T	high	3.805	4.14	3.47	PLST_HUMAN	NP_005023	0.05	329	hg19:chrX:114880851	503	R	503	R		1							DOMAIN // 383 // 627 // Actin-binding 2. /// DOMAIN // 397 // 506 // CH 3.	PF00307 // Calponin homology (CH) domain // 400 // 506	Calponin homology (CH) domain /// EF-hand domain pair
SLC8A3	NAC3_HUMAN G422W	G422W	high	3.755	4.87	2.64	NAC3_HUMAN	NP_150287	0.36	501	hg19:chr14:70633874	422	G	422	G		1			143				TOPO_DOM // 252 // 726 // Cytoplasmic (Potential). /// DOMAIN // 386 // 485 // Calx-beta 1.	PF03160 // Calx-beta domain // 385 // 485	Sodium/calcium exchanger protein /// Calx-beta domain
TARS2	SYTM_HUMAN R421S	R421S	high	3.705	5.21	2.2	SYTM_HUMAN	NP_079426	0	1038	hg19:chr1:150471000	421	R	421	R		1			99	5				PF00587 // tRNA synthetase class II core domain (G, H, P, S and T) // 331 // 512	/// tRNA synthetase class II core domain (G, H, P, S and T) /// TGS domain /// Anticodon binding domain /// Threonyl and Alanyl tRNA synthetase second additional domain
ABCA6	ABCA6_HUMAN E1592Q	E1592Q	medium	2.29	1.36	3.22	ABCA6_HUMAN	NP_525023	0.06	231	hg19:chr17:67075192	1592	E	1592	E					187	250	p.E1592Q,p.E1592*	carcinoma,adenocarcinoma		PB004161 // // 1516 // 1610	/// ABC transporter /// ABC-2 family transporter protein
ABCC12	MRP9_HUMAN Y624H	Y624H	medium	2.49	2.5	2.48	MRP9_HUMAN	NP_150229	0	1568	hg19:chr16:48149443	624	Y	624	Y		1			191	261			DOMAIN // 467 // 701 // ABC transporter 1.	PF00005 // ABC transporter // 496 // 631	ABC transporter /// ABC transporter transmembrane region
ADAM22	ADA22_HUMAN S324T	S324T	medium	2.005	1.61	2.4	ADA22_HUMAN	NP_004185	0.01	148	hg19:chr7:87760728	324	S	324	S		1			96	3			TOPO_DOM // 223 // 736 // Extracellular (Potential). /// DOMAIN // 239 // 438 // Peptidase M12B. /// STRAND // 325 // 333 //	PF01421 // Reprolysin (M12B) family zinc metalloprotease // 239 // 438	/// Disintegrin /// Reprolysin (M12B) family zinc metalloprotease /// Reprolysin family propeptide /// ADAM cysteine-rich
ADAMTSL3	ATL3_HUMAN D478Y	D478Y	medium	3.08	4.08	2.08	ATL3_HUMAN	NP_997400	0.52	1010	hg19:chr15:84561605	478	D	478	D					265	7	p.D478N	malignant_melanoma	DOMAIN // 478 // 535 // TSP type-1 3.		Thrombospondin type 1 domain /// Immunoglobulin I-set domain /// PLAC (protease and lacunin) domain /// Immunoglobulin domain
ADCY4	ADCY4_HUMAN A963V	A963V	medium	3.34	4.12	2.56	ADCY4_HUMAN	NP_640340	0.03	1023	hg19:chr14:24788371	963	A	963	A					92	186	p.A963V	acinar_carcinoma	TOPO_DOM // 808 // 1077 // Cytoplasmic (Potential).	PF00211 // Adenylate and Guanylate cyclase catalytic domain // 864 // 1064	/// Adenylate and Guanylate cyclase catalytic domain /// Domain of Unknown Function (DUF1053)
AMOT	AMOT_HUMAN R291M	R291M	medium	1.965	2.83	1.1	AMOT_HUMAN	NP_001106962	0.04	28	hg19:chrX:112059105	291	R	291	R											/// Angiomotin C terminal
AOC2	AOC2_HUMAN S146P	S146P	medium	2.395	2.71	2.08	AOC2_HUMAN	NP_001149	0.28	80	hg19:chr17:40997079	146	S	146	S					82					PF02727 // Copper amine oxidase, N2 domain // 62 // 148	Copper amine oxidase, enzyme domain /// Copper amine oxidase, N2 domain /// Copper amine oxidase, N3 domain
ATP13A2	AT132_HUMAN G1177V	G1177V	medium	1.95	1.95	1.95	AT132_HUMAN	NP_071372	0	15	hg19:chr1:17312728	1177	G	1177	G					106	13	p.G1177S	adenocarcinoma	TOPO_DOM // 1135 // 1180 // Cytoplasmic (Potential).		/// E1-E2 ATPase /// P5-type ATPase cation transporter /// haloacid dehalogenase-like hydrolase
BRD3	BRD3_HUMAN G593C	G593C	medium	3.115	2.73	3.5	BRD3_HUMAN	NP_031397	0.01	162	hg19:chr9:136901311	593	G	593	G					27	234			DOMAIN // 562 // 644 // NET.		Bromodomain
CARD14	CAR14_HUMAN R69W	R69W	medium	2.75	3.3	2.2	CAR14_HUMAN	NP_077015	0	40	hg19:chr17:78155442	69	R	69	R					72	130			DOMAIN // 15 // 107 // CARD.	PF00619 // Caspase recruitment domain // 20 // 106	/// Caspase recruitment domain
CHD1	CHD1_HUMAN K229R	K229R	medium	2.09	2.23	1.95	CHD1_HUMAN	NP_001261	0	36	hg19:chr5:98236687	229	K	229	K					131						/// SNF2 family N-terminal domain /// Helicase conserved C-terminal domain /// Chromo (CHRromatin Organisation MOdifier) domain /// Domain of unknown function (DUF4208)
CHD7	CHD7_HUMAN Q2765K	Q2765K	medium	2.47	3.33	1.61	CHD7_HUMAN	NP_060250	0	35	hg19:chr8:61777791	2765	Q	2765	Q					585		p.Q2765L	adenocarcinoma			/// SNF2 family N-terminal domain /// Helicase conserved C-terminal domain /// Chromo (CHRromatin Organisation MOdifier) domain /// BRK domain
CHST13	CHSTD_HUMAN G201V	G201V	medium	2.31	2.67	1.95	CHSTD_HUMAN	NP_690849	0	124	hg19:chr3:126260996	201	G	201	G					26	36			TOPO_DOM // 31 // 341 // Lumenal (Potential).	PF03567 // Sulfotransferase family // 97 // 333	Sulfotransferase family
COL11A1	COBA1_HUMAN G913A	G913A	medium	3.495	4.79	2.2	COBA1_HUMAN	NP_001845	0.5	1741	hg19:chr1:103444279	913	G	913	G					434	7			REGION // 529 // 1542 // Triple-helical region.		Collagen triple helix repeat (20 copies) /// Fibrillar collagen C-terminal domain /// Laminin G domain
COL6A3	CO6A3_HUMAN L592M	L592M	medium	3.48	4.48	2.48	CO6A3_HUMAN	NP_004360	0.1	627	hg19:chr2:238289679	592	L	592	L					490				DOMAIN // 445 // 620 // VWFA 3. /// REGION // 26 // 2038 // Nonhelical region.	PF00092 // von Willebrand factor type A domain // 445 // 615	Kunitz/Bovine pancreatic trypsin inhibitor domain /// von Willebrand factor type A domain /// Collagen triple helix repeat (20 copies)
CREB3L3	CR3L3_HUMAN V243G	V243G	medium	2.36	2.77	1.95	CR3L3_HUMAN	NP_115996	0.35	266	hg19:chr19:4168360	243	V	243	V					56	98			TOPO_DOM // 1 // 322 // Cytoplasmic (Potential). /// DOMAIN // 243 // 306 // bZIP.	PF00170 // bZIP transcription factor // 241 // 314	bZIP transcription factor
CRTAC1	CRAC1_HUMAN P394S	P394S	medium	1.95	1.95	1.95	CRAC1_HUMAN	NP_060528	0	19	hg19:chr10:99656700	394	P	394	P					91	4			REPEAT // 395 // 437 // FG-GAP 4; atypical.		ASPIC and UnbV /// Calcium-binding EGF domain /// Repeat domain in Vibrio, Colwellia, Bradyrhizobium and Shewanella
DNAH10	DYH10_HUMAN E1432K	E1432K	medium	3.365	4.25	2.48	DYH10_HUMAN	NP_997320	0	357	hg19:chr12:124317763	1432	E	1432	E					114				REGION // 1 // 1793 // Stem (By similarity).	PF08393 // Dynein heavy chain, N-terminal region 2 // 1252 // 1664	/// Dynein heavy chain and region D6 of dynein motor /// AAA domain (dynein-related subfamily) /// Dynein heavy chain, N-terminal region 1 /// Dynein heavy chain, N-terminal region 2 /// Hydrolytic ATP binding site of dynein motor region D1 /// P-loop containing dynein motor region D3 /// Microtubule-binding stalk of dynein motor /// P-loop containing dynein motor region D4 /// ATP-binding dynein…
EFS	EFS_HUMAN P365L	P365L	medium	2.08	2.08	2.08	EFS_HUMAN	NP_005855	0.79	75	hg19:chr14:23828592	365	P	365	P					46	96				PF12026 // Domain of unknown function (DUF3513) // 364 // 557	/// Domain of unknown function (DUF3513) /// Variant SH3 domain
FAM135A	F135A_HUMAN D440A	D440A	medium	1.955	2.3	1.61	F135A_HUMAN	NP_001156001	0	13	hg19:chr6:71234105	440	D	440	D					108						/// Putative serine esterase (DUF676) /// Protein of unknown function (DUF3657)
GABRB2	GBRB2_HUMAN A112E	A112E	medium	2.23	2.51	1.95	GBRB2_HUMAN	NP_000804	0.03	227	hg19:chr5:160886752	112	A	112	A		1			86	56			TOPO_DOM // 26 // 244 // Extracellular (Probable).	PF02931 // Neurotransmitter-gated ion-channel ligand binding domain // 36 // 242	Neurotransmitter-gated ion-channel ligand binding domain /// Neurotransmitter-gated ion-channel transmembrane region
GPR98	GPR98_HUMAN G2716R	G2716R	medium	2.3	2.3	2.3	GPR98_HUMAN	NP_115495	0.03	29	hg19:chr5:89992954	2716	G	2716	G					651	867			TOPO_DOM // 30 // 5908 // Extracellular (Potential).		/// 7 transmembrane receptor (Secretin family) /// Latrophilin/CL-1-like GPS domain /// Calx-beta domain /// EPTP domain /// Concanavalin A-like lectin/glucanases superfamily
HYDIN	HYDIN_HUMAN R2018H	R2018H	medium	2.52	2.4	2.64	HYDIN_HUMAN	NP_001257903	0	24	hg19:chr16:70993638	2018	R	2018	R					124	589				PB001622 // // 1699 // 2077	/// Flagellar-associated PapD-like
IL6R	IL6RA_HUMAN Q169K	Q169K	medium	2.095	2.4	1.79	IL6RA_HUMAN	NP_000556	0	18	hg19:chr1:154407041	169	Q	169	Q					7	77			TOPO_DOM // 20 // 365 // Extracellular (Potential). /// DOMAIN // 113 // 217 // Fibronectin type-III 1. /// DISULFID // 25 // 193 // /// DISULFID // 165 // 176 // /// STRAND // 159 // 168 // /// TURN // 169 // 172 //	PF09240 // Interleukin-6 receptor alpha chain, binding // 113 // 213	Interleukin-6 receptor alpha chain, binding
KIAA1549L	K154L_HUMAN A1385E	A1385E	medium	2.14	2.08	2.2	K154L_HUMAN	NP_036326	0.13	45	hg19:chr11:33628351	1385	A	1385	A					150
KL	KLOT_HUMAN G206D	G206D	medium	3.43	4.22	2.64	KLOT_HUMAN	NP_004786	0.01	1038	hg19:chr13:33591194	206	G	206	G					111	168			TOPO_DOM // 34 // 981 // Extracellular (Potential). /// REGION // 57 // 506 // Glycosyl hydrolase-1 1.	PF00232 // Glycosyl hydrolase family 1 // 57 // 374	Glycosyl hydrolase family 1
LYPD4	LYPD4_HUMAN C115Y	C115Y	medium	3.225	3.89	2.56	LYPD4_HUMAN	NP_775777	0.02	50	hg19:chr19:42342202	115	C	115	C					32						u-PAR/Ly-6 domain
MRPL21	RM21_HUMAN A102V	A102V	medium	3.13	3.43	2.83	RM21_HUMAN	NP_852615	0.02	162	hg19:chr11:68664073	102	A	102	A		1	1		15	47				PF00829 // Ribosomal prokaryotic L21 protein // 95 // 193	Ribosomal prokaryotic L21 protein
NDUFS2	NDUS2_HUMAN I161T	I161T	medium	2.195	3.29	1.1	NDUS2_HUMAN	NP_004541	0.01	699	hg19:chr1:161179070	161	I	161	I					36						Respiratory-chain NADH dehydrogenase, 49 Kd subunit
NF2	MERL_HUMAN E379D	E379D	medium	2.7	3.61	1.79	MERL_HUMAN	NP_000259	0.04	48	hg19:chr22:30069270	379	E	379	E					537		p.M375fs*20	malignant_melanoma	COMPBIAS // 327 // 465 // Glu-rich.	PF00769 // Ezrin/radixin/moesin family // 347 // 595	FERM central domain /// Ezrin/radixin/moesin family /// FERM N-terminal domain /// FERM C-terminal PH-like domain
NPEPL1	PEPL1_HUMAN G279A	G279A	medium	2.225	1.19	3.26	PEPL1_HUMAN	NP_078939	0.01	1048	hg19:chr20:57282191	279	G	279	G		1		1PE BES 1OT	37	2				PF00883 // Cytosol aminopeptidase family, catalytic domain // 178 // 485	/// Cytosol aminopeptidase family, catalytic domain
NTRK3	NTRK3_HUMAN H394N	H394N	medium	2.765	3.33	2.2	NTRK3_HUMAN	NP_002521	0.14	56	hg19:chr15:88678354	394	H	394	H					198	145	p.H394Q	adenocarcinoma	TOPO_DOM // 32 // 429 // Extracellular (Potential). /// STRAND // 385 // 393 //		Immunoglobulin domain /// Leucine rich repeat N-terminal domain /// Immunoglobulin I-set domain /// Protein tyrosine kinase /// Leucine rich repeat
PCSK4	PCSK4_HUMAN G265S	G265S	medium	2.45	2.46	2.44	PCSK4_HUMAN	NP_060043	0.31	609	hg19:chr19:1487200	265	G	265	G		1			51	151			REGION // 124 // 417 // Catalytic (By similarity).	PF00082 // Subtilase family // 153 // 441	Subtilase family /// Proprotein convertase P-domain
PGLYRP4	PGRP4_HUMAN A304D	A304D	medium	2.36	2.71	2.01	PGRP4_HUMAN	NP_065126	0	254	hg19:chr1:153309688	304	A	304	A					38	68			DISULFID // 210 // 332 // /// HELIX // 301 // 303 // /// STRAND // 304 // 311 //	PF01510 // N-acetylmuramoyl-L-alanine amidase // 225 // 360	N-acetylmuramoyl-L-alanine amidase
PIK3C2A	P3C2A_HUMAN P190A	P190A	medium	2.135	2.48	1.79	P3C2A_HUMAN	NP_002636	0	13	hg19:chr11:17190719	190	P	190	P					136	212				PB011861 // // 1 // 360	/// C2 domain /// Phosphatidylinositol 3- and 4-kinase /// Phosphoinositide 3-kinase family, accessory domain (PIK domain) /// PX domain /// Phosphoinositide 3-kinase C2 /// PI3-kinase family, ras-binding domain
PPP2R5D	2A5D_HUMAN R91S	R91S	medium	2.32	2.56	2.08	2A5D_HUMAN	NP_006236	0.03	32	hg19:chr6:42974366	91	R	91	R					50						Protein phosphatase 2A regulatory B subunit (B56 family)
PSG1	PSG1_HUMAN N57S	N57S	medium	2.6	2.72	2.48	PSG1_HUMAN	NP_008836	0	147	hg19:chr19:43382324	57	N	57	N		1			77				DOMAIN // 35 // 144 // Ig-like V-type.	PF07686 // Immunoglobulin V-set domain // 33 // 140	Immunoglobulin V-set domain /// Immunoglobulin domain
PTCH1	PTC1_HUMAN C304F	C304F	medium	3.115	4.03	2.2	PTC1_HUMAN	NP_000255	0	56	hg19:chr9:98242705	304	C	304	C					526	25			TOPO_DOM // 122 // 436 // Extracellular (Potential).		/// Patched family /// Sterol-sensing domain of SREBP cleavage-activation
PTPN12	PTN12_HUMAN P148S	P148S	medium	2.805	3.41	2.2	PTN12_HUMAN	NP_002826	0.02	593	hg19:chr7:77221523	148	P	148	P					81	13			DOMAIN // 28 // 293 // Tyrosine-protein phosphatase.	PF00102 // Protein-tyrosine phosphatase // 58 // 292	Protein-tyrosine phosphatase
RBPJL	RBPJL_HUMAN R220H	R220H	medium	3.04	4.13	1.95	RBPJL_HUMAN	NP_055091	0.02	65	hg19:chr20:43942146	220	R	220	R			1		65	92	p.R220L	serous_carcinoma	DNA_BIND // 221 // 230 // By similarity.	PF09270 // Beta-trefoil DNA-binding domain // 207 // 359	/// Beta-trefoil DNA-binding domain /// LAG1, DNA binding
RGS12	RGS12_HUMAN K815N	K815N	medium	3.12	4.45	1.79	RGS12_HUMAN	NP_002917	0.01	266	hg19:chr4:3418655	815	K	815	K		1		DTT	114	1			DOMAIN // 715 // 832 // RGS. /// HELIX // 802 // 816 //	PF00615 // Regulator of G protein signaling domain // 715 // 831	PDZ domain (Also known as DHR or GLGF) /// Regulator of G protein signaling domain /// GoLoco motif /// Raf-like Ras-binding domain
RGS9	RGS9_HUMAN T105A	T105A	medium	2.48	2.76	2.2	RGS9_HUMAN	NP_003826	0.03	76	hg19:chr17:63156654	105	T	105	T					85				DOMAIN // 30 // 105 // DEP.		Domain found in Dishevelled, Egl-10, and Pleckstrin (DEP) /// GGL domain /// Regulator of G protein signaling domain ///
RGS9	RGS9_HUMAN T105R	T105R	medium	3.17	4.14	2.2	RGS9_HUMAN	NP_003826	0.03	76	hg19:chr17:63156654	105	T	105	T					85				DOMAIN // 30 // 105 // DEP.		Domain found in Dishevelled, Egl-10, and Pleckstrin (DEP) /// GGL domain /// Regulator of G protein signaling domain ///
RMDN2	RMD2_HUMAN S142G	S142G	medium	3.135	3.5	2.77	RMD2_HUMAN	NP_001164262	0.44	90	hg19:chr2:38156844	142	S	142	S					13	62				PB003659 // // 1 // 379
RPAP2	RPAP2_HUMAN D3G	D3G	medium	2.125	2.3	1.95	RPAP2_HUMAN	NP_079089	0.14	14	hg19:chr1:92764637	3	D	3	D					57	3			MOD_RES // 2 // 2 // N-acetylalanine.		/// Rtr1/RPAP2 family
RXFP2	RXFP2_HUMAN P394L	P394L	medium	2.265	2.13	2.4	RXFP2_HUMAN	NP_570718	0	50	hg19:chr13:32365977	394	P	394	P					96				TOPO_DOM // 1 // 416 // Extracellular (Potential).		7 transmembrane receptor (rhodopsin family) /// Low-density lipoprotein receptor domain class A /// Leucine rich repeat
SAMD9L	SAM9L_HUMAN G1510V	G1510V	medium	2.935	3.47	2.4	SAM9L_HUMAN	NP_689916	0.26	46	hg19:chr7:92760755	1510	G	1510	G					233
SLC24A5	NCKX5_HUMAN A178E	A178E	medium	2.69	3.43	1.95	NCKX5_HUMAN	NP_995322	0	162	hg19:chr15:48427123	178	A	178	A				OLC	63		p.A178G	adenocarcinoma	TRANSMEM // 170 // 190 // Helical; Name=4; (Potential).	PF01699 // Sodium/calcium exchanger protein // 82 // 214	Sodium/calcium exchanger protein
SMC6	SMC6_HUMAN R403W	R403W	medium	1.995	2.2	1.79	SMC6_HUMAN	NP_078900	0	32	hg19:chr2:17898145	403	R	403	R					88				COILED // 226 // 451 // Potential.	PF02463 // RecF/RecN/SMC N terminal domain // 47 // 1071	RecF/RecN/SMC N terminal domain
SPHK1	SPHK1_HUMAN L11V	L11V	medium	2.17	1.57	2.77	SPHK1_HUMAN	NP_068807	0.23	161	hg19:chr17:74382086	11	L	25	L					28	2			DOMAIN // 12 // 159 // DAGKc. /// CONFLICT // 11 // 15 // LPRPC->ARL (in Ref. 4; CAB92131).		Diacylglycerol kinase catalytic domain
STARD13	STA13_HUMAN D134Y	D134Y	medium	2.75	3.71	1.79	STA13_HUMAN	NP_443083	0.03	69	hg19:chr13:33704412	134	D	16	D					93		p.D134N	endometrioid_carcinoma	MOD_RES // 133 // 133 // Phosphoserine (By similarity).		RhoGAP domain /// START domain /// SAM domain (Sterile alpha motif)
STARD8	STAR8_HUMAN G112C	G112C	medium	2.535	2.77	2.3	STAR8_HUMAN	NP_055540	0.23	56	hg19:chrX:67937330	112	G	112	G											RhoGAP domain /// START domain
SYNE1	SYNE1_HUMAN Q6075H	Q6075H	medium	1.975	1.87	2.08	SYNE1_HUMAN	NP_149062	0	17	hg19:chr6:152603098	6075	Q	6004	Q					1161	1375			TOPO_DOM // 1 // 8746 // Cytoplasmic (Potential).	PB000631 // // 5985 // 6192	/// Calponin homology (CH) domain /// Spectrin repeat /// Nuclear envelope localisation domain
TBC1D25	TBC25_HUMAN R297L	R297L	medium	3.32	4.44	2.2	TBC25_HUMAN	NP_002527	0	178	hg19:chrX:48418185	297	R	297	R		1				54			DOMAIN // 228 // 434 // Rab-GAP TBC.	PF00566 // Rab-GTPase-TBC domain // 231 // 435	Rab-GTPase-TBC domain
TFR2	TFR2_HUMAN V708L	V708L	medium	2.19	2.3	2.08	TFR2_HUMAN	NP_003218	0.02	51	hg19:chr7:100224398	708	V	708	V		1			70	150			TOPO_DOM // 105 // 801 // Extracellular (Potential).	PF04253 // Transferrin receptor-like dimerisation domain // 668 // 793	PA domain /// Transferrin receptor-like dimerisation domain /// Peptidase family M28
TGFBR1	TGFR1_HUMAN L464S	L464S	medium	2.41	1.68	3.14	TGFR1_HUMAN	NP_004603	0.68	1843	hg19:chr9:101911465	464	L	464	L					78				TOPO_DOM // 148 // 503 // Cytoplasmic (Potential). /// DOMAIN // 205 // 495 // Protein kinase. /// HELIX // 462 // 472 //	PF00069 // Protein kinase domain // 205 // 492	Protein kinase domain /// Activin types I and II receptor domain /// Transforming growth factor beta type I GS-motif
THOC2	THOC2_HUMAN L1043V	L1043V	medium	3.18	4.06	2.3	THOC2_HUMAN	NP_001075019	0	64	hg19:chrX:122758449	1043	L	1043	L						1				PF11262 // Transcription factor/nuclear export subunit protein 2 // 871 // 1174	/// Transcription factor/nuclear export subunit protein 2 /// Transcription- and export-related complex subunit
TNIP1	TNIP1_HUMAN R589G	R589G	medium	2.045	2.3	1.79	TNIP1_HUMAN	NP_006049	0	11	hg19:chr5:150413181	589	R	589	R					53		p.R589H	adenocarcinoma	REGION // 431 // 588 // Required for inhibitory activity of TNF- induced NF-kappa-B activation (By similarity). /// COMPBIAS // 539 // 636 // Pro-rich.
UNC5D	UNC5D_HUMAN H909R	H909R	medium	2.74	3.18	2.3	UNC5D_HUMAN	NP_543148	0	38	hg19:chr8:35647944	909	H	909	H					222	108			TOPO_DOM // 401 // 953 // Cytoplasmic (Potential). /// DOMAIN // 859 // 936 // Death.	PF00531 // Death domain // 859 // 935	/// Thrombospondin type 1 domain /// Death domain /// ZU5 domain /// Immunoglobulin I-set domain
UPRT	UPP_HUMAN S271P	S271P	medium	2.395	3.69	1.1	UPP_HUMAN	NP_659489	0.01	196	hg19:chrX:74520788	271	S	271	S						16				PF14681 // Uracil phosphoribosyltransferase // 113 // 307	Uracil phosphoribosyltransferase
XBP1	XBP1_HUMAN P15L	P15L	medium	2.36	2.64	2.08	XBP1_HUMAN	NP_005071	0.04	26	hg19:chr22:29196468	15	P	15	P					22	21					Basic region leucine zipper
ZNF226	ZN226_HUMAN Y419C	Y419C	medium	2.3	2.99	1.61	ZN226_HUMAN	NP_001027544	0.01	892	hg19:chr19:44680670	419	Y	419	Y		1	1	MPD	2				ZN_FING // 419 // 441 // C2H2-type 7.	PF13465 // Zinc-finger double domain // 405 // 430	Zinc finger, C2H2 type /// KRAB box /// Zinc-finger double domain
ZNF276	ZN276_HUMAN G418R	G418R	medium	2.585	2.77	2.4	ZN276_HUMAN	NP_689500	0	16	hg19:chr16:89799792	418	G	343	G					49	128					Zinc finger, C2H2 type /// Zinc-finger associated domain (zf-AD) /// C2H2-type zinc finger
ZZEF1	ZZEF1_HUMAN N324Y	N324Y	medium	2.215	2.64	1.79	ZZEF1_HUMAN	NP_055928	0	72	hg19:chr17:4015997	324	N	324	N					224	1	p.N324N	adenocarcinoma,neoplasm	DOMAIN // 226 // 405 // DOC.	PF03256 // Anaphase-promoting complex, subunit 10 (APC10) // 230 // 395	/// Anaphase-promoting complex, subunit 10 (APC10) /// Zinc finger, ZZ type

## Sheet: Sheet2
GENE
MUTATION
AA VARIANT
FUNC. IMPACT
FI SCORE
VC SCORE
VS SCORE
UNIPROT
REFSEQ
GAPS IN MSA
MSA HEIGHT
CODON START POSITION
UNIPROT POSITION
UNIPROT RESIDUE
REFSEQ POSITION
REFSEQ RESIDUE
FUNC. REGION
PROTEIN BIND.SITE
DNA/RNA BIND.SITE
SMALL.MOL BIND.SITE
N.COSMIC
N.SNPS
MUTATIONS IN COSMIC@POSITION
CANCER TYPES IN COSMIC@POSITION
REGIONS@POSITION
DOMAIN@POSITION
DOMAINS
