# Supplementary material for: Identification of TAZ-Dependent Breast Cancer Vulnerabilities Using a Chemical Genomics Screening Approach
Source: Front Cell Dev Biol. 2021 Jun 15;9:673374. doi: 10.3389/fcell.2021.673374 (PMC8239392; doi:10.3389/fcell.2021.673374)
Supplement: Supplementary file 2 [file Table_2.XLSX]

## Sheet: DE Data
ENSEMBL GENE ID	GENE SYMBOL	BASE MEAN	LOG2 Fold Change	LFC SE	STAT	P VALUE	FDR
ENSG00000197956.9	S100A6	4021.12	-12.0631	0.838524	-14.3861	6.33e-47	3.24e-45
ENSG00000205426.10	KRT81	4077.83	-11.9922	0.558001	-21.4914	1.87e-102	2.9e-100
ENSG00000248698.5	LINC01085	159.615	-11.5656	1.51083	-7.65517	1.93e-14	2.57e-13
ENSG00000162706.12	CADM3	586.725	-11.4268	1.43219	-7.97852	1.48e-15	2.11e-14
ENSG00000169715.14	MT1E	1124.64	-11.352	0.841082	-13.4969	1.63e-41	7.26e-40
ENSG00000151388.10	ADAMTS12	497.099	-11.0085	1.43241	-7.6853	1.53e-14	2.04e-13
ENSG00000263426.2	RN7SL471P	1182.53	-10.9554	1.03914	-10.5427	5.49e-26	1.35e-24
ENSG00000184292.6	TACSTD2	227.971	-10.856	1.45516	-7.46033	8.63e-14	1.09e-12
ENSG00000135480.14	KRT7	5128.27	-10.8537	0.345289	-31.4337	7.02e-217	4.03e-214
ENSG00000135443.8	KRT85	82.8695	-10.5998	1.45993	-7.2605	3.86e-13	4.65e-12
ENSG00000173432.10	SAA1	436.74	-10.431	1.02836	-10.1433	3.55e-24	8.15e-23
ENSG00000225383.7	SFTA1P	231.978	-10.3834	1.45061	-7.15796	8.19e-13	9.58e-12
ENSG00000135477.11	KRT87P	334.108	-10.1958	1.0316	-9.88345	4.91e-23	1.06e-21
ENSG00000170523.3	KRT83	154.245	-10.0507	1.43945	-6.98234	2.9e-12	3.24e-11
ENSG00000261379.1	RP11-395N3.1	67.3089	-9.99029	1.46619	-6.81375	9.51e-12	1.02e-10
ENSG00000213088.9	ACKR1	67.338	-9.88843	1.46463	-6.75148	1.46e-11	1.54e-10
ENSG00000142185.16	TRPM2	46.8399	-9.69325	1.46947	-6.59644	4.21e-11	4.28e-10
ENSG00000007038.10	PRSS21	71.1858	-9.62491	1.46176	-6.58448	4.56e-11	4.62e-10
ENSG00000154133.14	ROBO4	69.0857	-9.44961	1.46307	-6.45875	1.06e-10	1.04e-09
ENSG00000165512.4	ZNF22	43.1946	-9.42029	1.47165	-6.4012	1.54e-10	1.49e-09
ENSG00000122862.4	SRGN	2222.7	-9.40283	0.410956	-22.8804	7.29e-116	1.39e-113
ENSG00000273983.1	HIST1H3G	370.803	-9.38473	0.733079	-12.8018	1.6e-37	6.16e-36
ENSG00000106366.8	SERPINE1	10574.5	-9.35121	0.334228	-27.9785	2.97e-172	1.13e-169
ENSG00000139304.12	PTPRQ	86.4646	-9.25843	1.4598	-6.34226	2.26e-10	2.16e-09
ENSG00000137801.10	THBS1	36185.6	-9.24956	0.1076	-85.9621	0	0
ENSG00000169933.12	FRMPD4	49.6728	-9.13075	1.47097	-6.20729	5.39e-10	4.98e-09
ENSG00000225670.4	CADM3-AS1	28.8413	-9.03345	1.48828	-6.06971	1.28e-09	1.14e-08
ENSG00000102854.15	MSLN	599.347	-8.98949	0.840496	-10.6955	1.07e-26	2.68e-25
ENSG00000163751.3	CPA3	159.111	-8.86442	1.45574	-6.08928	1.13e-09	1.02e-08
ENSG00000160255.17	ITGB2	694.703	-8.83176	0.728184	-12.1285	7.46e-34	2.52e-32
ENSG00000173040.12	EVC2	52.8077	-8.73805	1.46893	-5.9486	2.7e-09	2.33e-08
ENSG00000267374.1	RP11-244M2.1	21.4135	-8.6957	1.49972	-5.7982	6.7e-09	5.55e-08
ENSG00000231131.6	LINC01468	29.5733	-8.62052	1.48576	-5.80211	6.55e-09	5.43e-08
ENSG00000229230.3	MT1P3	19.8212	-8.56813	1.50623	-5.68844	1.28e-08	1.03e-07
ENSG00000186493.11	C5orf38	79.1777	-8.55247	1.46372	-5.84298	5.13e-09	4.3e-08
ENSG00000161850.2	KRT82	19.2187	-8.49132	1.50645	-5.63663	1.73e-08	1.38e-07
ENSG00000255986.6	MT1JP	50.3414	-8.45862	1.45593	-5.80976	6.26e-09	5.2e-08
ENSG00000166825.13	ANPEP	965.657	-8.43801	0.368139	-22.9207	2.89e-116	5.57e-114
ENSG00000257151.1	PWAR6	36.8644	-8.39921	1.47867	-5.68023	1.35e-08	1.08e-07
ENSG00000261069.3	RP11-701H24.4	34.3046	-8.37931	1.48233	-5.6528	1.58e-08	1.26e-07
ENSG00000249751.3	ECSCR	36.1215	-8.34056	1.48069	-5.63287	1.77e-08	1.41e-07
ENSG00000272622.1	RP11-395N3.2	57.009	-8.15877	1.46022	-5.58736	2.31e-08	1.81e-07
ENSG00000250786.1	SNHG18	31.5487	-7.98182	1.48923	-5.35969	8.34e-08	6.11e-07
ENSG00000239697.10	TNFSF12	32.0065	-7.97358	1.49138	-5.34643	8.97e-08	6.54e-07
ENSG00000170442.11	KRT86	290.228	-7.96827	0.532527	-14.9632	1.28e-50	7.28e-49
ENSG00000182492.15	BGN	659.662	-7.87806	0.446636	-17.6386	1.24e-69	1.09e-67
ENSG00000117594.9	HSD11B1	89.9278	-7.87357	1.04194	-7.55662	4.14e-14	5.35e-13
ENSG00000276107.1	CTD-2033D15.2	58.0929	-7.78315	1.05176	-7.40013	1.36e-13	1.7e-12
ENSG00000260549.1	MT1L	61.0238	-7.77829	1.05235	-7.39139	1.45e-13	1.81e-12
ENSG00000060558.3	GNA15	162.942	-7.77654	0.850413	-9.14443	5.99e-20	1.1e-18
ENSG00000106991.13	ENG	719.558	-7.75399	0.389276	-19.919	2.79e-88	3.45e-86
ENSG00000184357.4	HIST1H1B	932.457	-7.74947	0.283672	-27.3184	2.56e-164	8.29e-162
ENSG00000171658.8	RP11-443P15.2	33.8695	-7.74125	1.47108	-5.26228	1.42e-07	1.01e-06
ENSG00000279367.1	RP11-157P23.1	40.554	-7.65753	1.46489	-5.22737	1.72e-07	1.21e-06
ENSG00000168497.4	SDPR	548.173	-7.5825	0.36907	-20.5449	8.55e-94	1.15e-91
ENSG00000106484.14	MEST	175.244	-7.52237	0.664017	-11.3286	9.47e-30	2.72e-28
ENSG00000226752.8	PSMD5-AS1	10.6718	-7.46713	1.56089	-4.78389	1.72e-06	1.07e-05
ENSG00000267774.2	RP11-2N1.2	118.919	-7.4615	0.748951	-9.96261	2.22e-23	4.88e-22
ENSG00000078401.6	EDN1	147.099	-7.45403	0.741754	-10.0492	9.26e-24	2.08e-22
ENSG00000113805.8	CNTN3	28.4904	-7.3932	1.49459	-4.94665	7.55e-07	4.93e-06
ENSG00000278621.1	CTD-2033D15.3	21.9395	-7.38393	1.48752	-4.96391	6.91e-07	4.53e-06
ENSG00000257671.1	RP3-416H24.1	87.2032	-7.31924	0.753294	-9.71631	2.57e-22	5.35e-21
ENSG00000170561.12	IRX2	467.737	-7.31537	0.556675	-13.1412	1.91e-39	7.83e-38
ENSG00000198796.6	ALPK2	780.488	-7.26444	0.411869	-17.6377	1.26e-69	1.1e-67
ENSG00000279192.1	PWAR5	122.86	-7.18222	1.03987	-6.90683	4.96e-12	5.44e-11
ENSG00000170396.7	ZNF804A	45.7291	-7.06724	1.06049	-6.66414	2.66e-11	2.75e-10
ENSG00000187908.15	DMBT1	35.2156	-7.04174	1.07229	-6.567	5.13e-11	5.17e-10
ENSG00000246228.6	CASC8	10.0756	-7.03363	1.56455	-4.49563	6.94e-06	3.97e-05
ENSG00000224000.1	RP3-471M13.2	8.60682	-7.01709	1.58342	-4.43161	9.35e-06	5.24e-05
ENSG00000169594.13	BNC1	873.942	-6.98151	0.29622	-23.5686	8.09e-123	1.66e-120
ENSG00000169994.18	MYO7B	171.603	-6.97777	0.611375	-11.4132	3.59e-30	1.05e-28
ENSG00000229647.1	AC007879.7	16.5054	-6.94355	1.50734	-4.60648	4.1e-06	2.42e-05
ENSG00000138356.13	AOX1	692.14	-6.92962	0.359727	-19.2635	1.09e-82	1.21e-80
ENSG00000100558.8	PLEK2	80.9801	-6.92635	0.752601	-9.20322	3.47e-20	6.47e-19
ENSG00000178814.16	OPLAH	100.023	-6.92097	0.859521	-8.05212	8.14e-16	1.18e-14
ENSG00000274928.6	KRT89P	6.54915	-6.90518	1.62192	-4.25741	2.07e-05	0.000110578
ENSG00000275691.1	RP11-249C24.12	5.81537	-6.89817	1.65163	-4.17657	2.96e-05	0.000154707
ENSG00000229373.8	LINC00452	7.289	-6.86685	1.61119	-4.26198	2.03e-05	0.000108507
ENSG00000115380.19	EFEMP1	8646.49	-6.84031	0.105093	-65.0882	0	0
ENSG00000174080.10	CTSF	86.0354	-6.81813	1.04539	-6.52213	6.93e-11	6.9e-10
ENSG00000182585.9	EPGN	5.86925	-6.74163	1.64243	-4.10468	4.05e-05	0.000207913
ENSG00000235269.1	AL162759.1	7.81612	-6.69929	1.59839	-4.19127	2.77e-05	0.000145694
ENSG00000223975.1	AP001048.4	14.536	-6.63821	1.54055	-4.30898	1.64e-05	8.92e-05
ENSG00000120675.5	DNAJC15	168.942	-6.60916	0.534096	-12.3745	3.59e-35	1.27e-33
ENSG00000243658.1	MTND5P16	7.4233	-6.58697	1.60415	-4.1062	4.02e-05	0.000206703
ENSG00000267257.1	RP11-1151B14.4	13.1419	-6.56515	1.54981	-4.23611	2.27e-05	0.000120832
ENSG00000169908.11	TM4SF1	598.688	-6.52433	0.381802	-17.0882	1.82e-65	1.47e-63
ENSG00000166741.7	NNMT	510.823	-6.52387	0.286539	-22.7678	9.56e-115	1.79e-112
ENSG00000120708.16	TGFBI	1055.72	-6.49235	0.183475	-35.3856	2.85e-274	2.67e-271
ENSG00000115295.19	CLIP4	794.84	-6.47227	0.364423	-17.7603	1.43e-70	1.29e-68
ENSG00000277775.1	HIST1H3F	298.471	-6.46649	0.420952	-15.3616	2.96e-53	1.78e-51
ENSG00000258484.3	SPESP1	65.6456	-6.45601	0.867907	-7.4386	1.02e-13	1.28e-12
ENSG00000161849.3	KRT84	13.1059	-6.42827	1.53177	-4.19664	2.71e-05	0.000142631
ENSG00000259571.1	BLID	11.1794	-6.37967	1.53693	-4.15091	3.31e-05	0.000171978
ENSG00000120156.20	TEK	6.62732	-6.37203	1.62299	-3.92611	8.63e-05	0.000418798
ENSG00000204264.8	PSMB8	156.019	-6.37201	0.614493	-10.3695	3.41e-25	8.14e-24
ENSG00000157680.15	DGKI	36.533	-6.34143	0.897416	-7.06632	1.59e-12	1.81e-11
ENSG00000165887.11	ANKRD2	36.0069	-6.2996	0.890874	-7.07125	1.54e-12	1.75e-11
ENSG00000204362.6	RP11-380J14.1	4.01259	-6.29455	1.73606	-3.62576	0.000288114	0.00127461
ENSG00000267761.3	CTD-2130O13.1	138.695	-6.27483	0.614908	-10.2045	1.89e-24	4.41e-23
ENSG00000248187.1	RP11-184M15.1	5.03008	-6.27334	1.66166	-3.77534	0.000159789	0.000738482
ENSG00000172935.8	MRGPRF	50.5348	-6.27195	0.876508	-7.15561	8.33e-13	9.73e-12
ENSG00000158716.8	DUSP23	257.165	-6.26859	0.376608	-16.6449	3.3e-62	2.46e-60
ENSG00000120217.13	CD274	537.737	-6.23127	0.34831	-17.89	1.41e-71	1.28e-69
ENSG00000183783.6	KCTD8	4.14821	-6.21884	1.70904	-3.63879	0.000273921	0.00121718
ENSG00000206075.13	SERPINB5	154.632	-6.18718	0.443022	-13.9658	2.52e-44	1.19e-42
ENSG00000115602.16	IL1RL1	16.4429	-6.16827	2.04062	-3.02275	0.00250492	0.00918331
ENSG00000261307.1	RP11-157P23.2	5.21197	-6.16799	1.6671	-3.69984	0.000215733	0.000975408
ENSG00000154319.14	FAM167A	1063.72	-6.1593	0.191076	-32.2349	5.73e-228	3.93e-225
ENSG00000170477.12	KRT4	4.42413	-6.15109	1.71215	-3.59261	0.000327378	0.00143166
ENSG00000275713.2	HIST1H2BH	294.972	-5.95575	0.28824	-20.6624	7.54e-95	1.04e-92
ENSG00000279769.1	CH507-42P11.3	268.657	-5.95532	0.424664	-14.0236	1.12e-44	5.34e-43
ENSG00000255450.1	CTD-2063L20.1	17.4528	-5.95327	1.50284	-3.96133	7.45e-05	0.000364577
ENSG00000136869.13	TLR4	63.6663	-5.95235	0.601493	-9.89596	4.33e-23	9.36e-22
ENSG00000174808.11	BTC	3.8785	-5.94835	4.79516	-1.24049	0.214794	0.395661
ENSG00000165071.14	TMEM71	34.3479	-5.94446	1.4733	-4.03478	5.47e-05	0.00027446
ENSG00000167601.11	AXL	10912.7	-5.93855	0.106567	-55.7258	0	0
ENSG00000117525.13	F3	2181.7	-5.93056	0.249148	-23.8033	3.08e-125	6.48e-123
ENSG00000221826.9	PSG3	17.144	-5.91589	1.54448	-3.83033	0.00012797	0.000601807
ENSG00000167880.7	EVPL	210.722	-5.90917	0.369938	-15.9734	1.96e-57	1.3e-55
ENSG00000176720.4	BOK	283.197	-5.89613	0.396141	-14.8839	4.19e-50	2.36e-48
ENSG00000144583.4	2021-03-04	190.228	-5.89514	0.377282	-15.6253	4.9e-55	3.07e-53
ENSG00000134802.17	SLC43A3	353.919	-5.86801	0.263628	-22.2587	9.29e-110	1.64e-107
ENSG00000266088.5	RP5-1028K7.2	15.5771	-5.85745	1.13217	-5.17365	2.3e-07	1.59e-06
ENSG00000164128.6	NPY1R	3.58851	-5.84164	1.75676	-3.32524	0.00088343	0.00357707
ENSG00000269964.2	MEI4	6.46484	-5.8275	1.64873	-3.53454	0.000408493	0.00175663
ENSG00000144229.11	THSD7B	3.36336	-5.82023	1.80505	-3.22441	0.00126233	0.00493495
ENSG00000171094.15	ALK	8.84779	-5.8164	1.60076	-3.63353	0.000279569	0.00124051
ENSG00000255281.1	RP11-460B17.1	17.7596	-5.7762	1.50353	-3.84177	0.000122151	0.000575979
ENSG00000170465.9	KRT6C	15.8856	-5.76999	1.12938	-5.10897	3.24e-07	2.2e-06
ENSG00000151490.13	PTPRO	8.13654	-5.73484	1.57303	-3.64572	0.000266647	0.00118786
ENSG00000197646.7	PDCD1LG2	41.2869	-5.73278	0.780961	-7.34067	2.13e-13	2.61e-12
ENSG00000241787.1	MTND4P16	4.04914	-5.73117	1.73625	-3.3009	0.000963761	0.00387335
ENSG00000144810.15	COL8A1	2120.4	-5.71994	0.145815	-39.2273	0	0
ENSG00000147027.3	TMEM47	31.6334	-5.71372	1.0795	-5.29294	1.2e-07	8.63e-07
ENSG00000141753.6	IGFBP4	1964.25	-5.65921	0.141483	-39.9992	0	0
ENSG00000183287.13	CCBE1	2922.16	-5.65643	0.131266	-43.0914	0	0
ENSG00000161896.11	IP6K3	8.84243	-5.65343	1.56153	-3.62045	0.000294091	0.00129881
ENSG00000270246.3	RP11-701H24.8	3.8331	-5.64315	1.77244	-3.18384	0.00145337	0.00560957
ENSG00000236761.5	CTAGE9	10.2415	-5.63611	1.55297	-3.62924	0.000284254	0.00125912
ENSG00000275291.1	U1	2.36178	-5.62685	4.79779	-1.1728	0.240875	0.428593
ENSG00000132470.13	ITGB4	622.184	-5.61211	0.307532	-18.2489	2.11e-74	2.06e-72
ENSG00000124610.4	HIST1H1A	196.783	-5.60626	0.306715	-18.2784	1.23e-74	1.21e-72
ENSG00000113721.13	PDGFRB	1118.26	-5.60289	0.311712	-17.9746	3.08e-72	2.84e-70
ENSG00000162366.7	PDZK1IP1	17.4786	-5.59519	1.55377	-3.60104	0.00031695	0.00138995
ENSG00000238266.1	LINC00707	171.661	-5.59175	0.34421	-16.2452	2.42e-59	1.69e-57
ENSG00000024422.11	EHD2	1027.26	-5.58178	0.188368	-29.6323	5.73e-193	2.56e-190
ENSG00000230309.1	RP3-390M24.1	5.06655	-5.5678	1.69045	-3.29367	0.000988868	0.00396125
ENSG00000198959.11	TGM2	3496.1	-5.50839	0.114959	-47.9159	0	0
ENSG00000120337.8	TNFSF18	14.7217	-5.49077	1.56213	-3.51493	0.000439872	0.00188082
ENSG00000278970.1	HEIH	84.8921	-5.48673	0.759487	-7.22426	5.04e-13	6.02e-12
ENSG00000173210.19	ABLIM3	869.655	-5.46623	0.176228	-31.0179	3.09e-211	1.64e-208
ENSG00000253406.1	AC012613.2	74.7371	-5.43419	0.593205	-9.16073	5.15e-20	9.5e-19
ENSG00000091986.15	CCDC80	4850.91	-5.41258	0.115275	-46.9538	0	0
ENSG00000137752.22	CASP1	26.926	-5.40522	1.09188	-4.95039	7.41e-07	4.84e-06
ENSG00000222032.1	AC112721.2	5.68618	-5.39085	1.65609	-3.25517	0.00113323	0.0044833
ENSG00000235448.1	LURAP1L-AS1	7.10305	-5.3895	1.63343	-3.29949	0.000968595	0.00389056
ENSG00000134463.14	ECHDC3	167.629	-5.37649	0.375032	-14.3361	1.3e-46	6.62e-45
ENSG00000212724.3	KRTAP2-3	39.0007	-5.34199	0.834866	-6.39861	1.57e-10	1.52e-09
ENSG00000127824.13	TUBA4A	371.414	-5.32026	0.248024	-21.4506	4.51e-102	6.89e-100
ENSG00000167772.11	ANGPTL4	490.925	-5.31586	0.192705	-27.5856	1.66e-167	5.83e-165
ENSG00000145287.10	PLAC8	715.081	-5.30812	0.168478	-31.5064	7.1e-218	4.25e-215
ENSG00000267061.1	RP11-760L24.1	18.9108	-5.28774	1.1212	-4.71615	2.4e-06	1.47e-05
ENSG00000184156.15	KCNQ3	28.0645	-5.28662	0.738854	-7.15515	8.36e-13	9.76e-12
ENSG00000185186.8	LINC00313	161.299	-5.27225	0.467785	-11.2707	1.83e-29	5.19e-28
ENSG00000162383.11	SLC1A7	259.542	-5.26704	0.667817	-7.88695	3.1e-15	4.33e-14
ENSG00000280191.3	CH507-42P11.5	77.6324	-5.26245	0.687649	-7.65282	1.97e-14	2.61e-13
ENSG00000261051.1	RP11-274H2.5	77.5885	-5.26016	0.532873	-9.87132	5.54e-23	1.19e-21
ENSG00000178031.16	ADAMTSL1	27.1846	-5.25885	0.804917	-6.5334	6.43e-11	6.42e-10
ENSG00000227039.6	ITGB2-AS1	50.9084	-5.24854	0.610687	-8.59447	8.36e-18	1.37e-16
ENSG00000196154.11	S100A4	1509.52	-5.23266	0.171696	-30.4763	5.37e-204	2.6e-201
ENSG00000198910.12	L1CAM	1007.2	-5.20214	0.182695	-28.4745	2.43e-178	9.75e-176
ENSG00000198467.13	TPM2	1373.3	-5.20157	0.169201	-30.742	1.56e-207	7.85e-205
ENSG00000117228.9	GBP1	58.5225	-5.19387	0.578992	-8.97053	2.95e-19	5.24e-18
ENSG00000220884.2	MESTP1	7.24847	-5.17798	1.60226	-3.23167	0.00123068	0.0048255
ENSG00000131738.10	KRT33B	8.03181	-5.17453	1.63555	-3.16379	0.00155727	0.0059672
ENSG00000170498.8	KISS1	13.1598	-5.17216	1.58344	-3.26641	0.0010892	0.00432437
ENSG00000111348.8	ARHGDIB	100.162	-5.16589	0.392649	-13.1565	1.56e-39	6.44e-38
ENSG00000170549.3	IRX1	46.4874	-5.16417	0.77821	-6.63596	3.22e-11	3.31e-10
ENSG00000125508.3	SRMS	12.246	-5.16392	1.54062	-3.35186	0.000802716	0.00327634
ENSG00000270704.3	RP11-701H24.5	7.18763	-5.15911	1.64435	-3.13748	0.00170406	0.0064759
ENSG00000167653.4	PSCA	49.1352	-5.15648	0.551903	-9.34308	9.36e-21	1.8e-19
ENSG00000185860.13	CCDC190	11.2033	-5.15226	1.16102	-4.43768	9.09e-06	5.11e-05
ENSG00000109321.10	AREG	264.187	-5.14138	0.239144	-21.4991	1.59e-102	2.48e-100
ENSG00000279205.1	RP11-632P5.1	2.74407	-5.1109	1.94015	-2.63429	0.00843133	0.0272845
ENSG00000243130.7	PSG11	21.8824	-5.10199	1.50297	-3.39461	0.000687275	0.0028442
ENSG00000092969.11	TGFB2	1336.68	-5.09352	0.160728	-31.6903	2.12e-220	1.29e-217
ENSG00000238279.1	BX470102.3	8.96475	-5.0868	1.55899	-3.26288	0.00110284	0.00437175
ENSG00000196754.10	S100A2	304.516	-5.05885	0.235343	-21.4957	1.71e-102	2.66e-100
ENSG00000235563.1	RP11-334A14.8	44.9631	-5.03825	1.53196	-3.28877	0.00100625	0.0040223
ENSG00000225877.1	AC004603.4	8.82576	-5.03734	1.6232	-3.10333	0.00191353	0.00720769
ENSG00000149596.6	JPH2	101.529	-5.03534	0.402815	-12.5004	7.43e-36	2.67e-34
ENSG00000242001.1	GS1-388B5.1	5.60883	-5.02787	1.68656	-2.98115	0.00287171	0.0103873
ENSG00000141526.15	SLC16A3	1694.19	-4.98923	0.122524	-40.7206	0	0
ENSG00000170989.8	S1PR1	101.254	-4.98844	0.435776	-11.4473	2.43e-30	7.14e-29
ENSG00000153823.18	PID1	58.5456	-4.9687	0.606611	-8.19091	2.59e-16	3.86e-15
ENSG00000047936.10	ROS1	28.311	-4.94534	0.70502	-7.01447	2.31e-12	2.6e-11
ENSG00000168685.14	IL7R	1120.09	-4.9367	0.231166	-21.3557	3.46e-101	5.23e-99
ENSG00000254526.1	RP11-466I1.1	3.54822	-4.9161	1.79547	-2.73805	0.0061804	0.0206932
ENSG00000154678.16	PDE1C	459.874	-4.91547	0.279262	-17.6016	2.39e-69	2.08e-67
ENSG00000198846.5	TOX	25.0225	-4.90644	0.814614	-6.02303	1.71e-09	1.51e-08
ENSG00000280013.1	CH507-42P11.2	51.8925	-4.8977	0.703381	-6.96308	3.33e-12	3.7e-11
ENSG00000272597.1	RP11-446H18.6	4.45281	-4.89377	1.72681	-2.834	0.00459691	0.0158814
ENSG00000095261.13	PSMD5	405.691	-4.88912	0.225504	-21.6809	3.11e-104	5e-102
ENSG00000131737.5	KRT34	101.6	-4.88633	0.631722	-7.73493	1.03e-14	1.4e-13
ENSG00000170848.15	PSG6	30.7911	-4.85019	1.09144	-4.44382	8.84e-06	4.98e-05
ENSG00000272551.1	RP11-324L17.1	4.6705	-4.84201	1.68666	-2.87077	0.00409476	0.0143322
ENSG00000127129.9	EDN2	5.34014	-4.8243	1.64324	-2.93585	0.00332635	0.0118655
ENSG00000108821.13	COL1A1	3221.05	-4.81157	0.244883	-19.6485	5.96e-86	6.99e-84
ENSG00000255248.7	MIR100HG	314.723	-4.80737	0.24061	-19.9799	8.23e-89	1.03e-86
ENSG00000064042.17	LIMCH1	4770.27	-4.7834	0.0916036	-52.2184	0	0
ENSG00000132821.11	VSTM2L	56.5884	-4.77632	0.498067	-9.58971	8.83e-22	1.8e-20
ENSG00000108846.15	ABCC3	500.875	-4.73617	0.179691	-26.3574	4.22e-153	1.19e-150
ENSG00000114854.7	TNNC1	41.3749	-4.72574	1.49227	-3.1668	0.00154125	0.00591305
ENSG00000226928.1	RPS14P4	4.88711	-4.72161	1.66538	-2.83515	0.00458043	0.0158351
ENSG00000175040.5	CHST2	587.609	-4.69041	0.158717	-29.5519	6.2e-192	2.73e-189
ENSG00000095383.19	TBC1D2	680.906	-4.68475	0.206608	-22.6746	7.97e-114	1.47e-111
ENSG00000178773.14	CPNE7	321.652	-4.67988	0.292037	-16.025	8.55e-58	5.73e-56
ENSG00000244693.1	CTAGE8	5.62313	-4.6698	1.62629	-2.87145	0.00408592	0.014303
ENSG00000104783.11	KCNN4	37.9708	-4.66646	0.631524	-7.38921	1.48e-13	1.84e-12
ENSG00000135905.18	DOCK10	244.386	-4.66231	0.235212	-19.8217	1.93e-87	2.33e-85
ENSG00000188015.9	S100A3	89.9082	-4.63625	0.387843	-11.9539	6.19e-33	2.02e-31
ENSG00000254827.5	SLC22A18AS	10.4716	-4.62033	1.17051	-3.94727	7.9e-05	0.000385524
ENSG00000267439.1	AC002398.11	19.7139	-4.6109	1.51952	-3.03445	0.00240976	0.00886676
ENSG00000162981.13	FAM84A	20.6375	-4.60592	0.939046	-4.90489	9.35e-07	6.03e-06
ENSG00000183087.14	GAS6	2702	-4.60008	0.120579	-38.1501	0	0
ENSG00000109846.7	CRYAB	7.2482	-4.59705	1.5976	-2.87748	0.00400861	0.0140603
ENSG00000111799.20	COL12A1	4859.82	-4.5966	0.09488	-48.4464	0	0
ENSG00000150782.11	IL18	1001.93	-4.58799	0.201753	-22.7406	1.78e-114	3.29e-112
ENSG00000267120.3	AD000671.6	4.77182	-4.57029	1.73311	-2.63704	0.00836326	0.0270798
ENSG00000169252.5	ADRB2	251.561	-4.56696	0.248286	-18.394	1.47e-75	1.47e-73
ENSG00000179862.6	CITED4	405.397	-4.51131	0.24072	-18.7409	2.3e-78	2.42e-76
ENSG00000181019.12	NQO1	1890.66	-4.50998	0.116957	-38.5609	0	0
ENSG00000164283.12	ESM1	7.13187	-4.49221	2.55168	-1.76049	0.0783241	0.181813
ENSG00000197153.4	HIST1H3J	136.072	-4.47434	0.281983	-15.8674	1.07e-56	6.94e-55
ENSG00000168405.14	CMAHP	4.14189	-4.47095	1.70995	-2.61466	0.00893153	0.0287544
ENSG00000189108.12	IL1RAPL2	3.55475	-4.46408	1.73315	-2.57571	0.0100034	0.0317255
ENSG00000232480.1	TGFB2-AS1	11.0971	-4.42793	1.1739	-3.772	0.000161946	0.000747348
ENSG00000136717.14	BIN1	699.75	-4.39344	0.159578	-27.5317	7.34e-167	2.46e-164
ENSG00000255043.1	NAV2-AS5	10.8213	-4.39122	1.02664	-4.27728	1.89e-05	0.000101914
ENSG00000128739.21	SNRPN	127.073	-4.38951	0.431849	-10.1645	2.86e-24	6.6e-23
ENSG00000174567.7	GOLT1A	21.8816	-4.38424	1.51466	-2.89454	0.00379711	0.0133802
ENSG00000273173.5	SNURF	5.18341	-4.38298	1.73414	-2.52747	0.0114886	0.0358665
ENSG00000265206.4	MIR142	3.62554	-4.38298	1.76942	-2.47707	0.0132464	0.0405395
ENSG00000163810.11	TGM4	7.7354	-4.3822	1.21659	-3.60204	0.000315726	0.00138522
ENSG00000155622.6	XAGE2	12.3256	-4.37879	1.551	-2.8232	0.00475471	0.0163612
ENSG00000274376.4	ADAMTS7P1	8.56896	-4.37616	1.60487	-2.7268	0.00639512	0.0213305
ENSG00000116183.10	PAPPA2	133.52	-4.37359	0.596487	-7.33224	2.26e-13	2.78e-12
ENSG00000272825.1	LL21NC02-1C16.2	16.2752	-4.37173	0.796676	-5.48747	4.08e-08	3.1e-07
ENSG00000282943.1	CTC-490G23.6	8.46714	-4.3645	1.6694	-2.61441	0.00893823	0.0287694
ENSG00000230889.2	SHC1P1	5.15188	-4.36233	1.67874	-2.59858	0.00936106	0.0299386
ENSG00000185069.2	KRT76	15.4967	-4.3551	0.814299	-5.34827	8.88e-08	6.48e-07
ENSG00000154589.6	LY96	4.21313	-4.33759	1.83301	-2.36637	0.0179634	0.0527449
ENSG00000234409.6	CCDC188	14.0933	-4.32985	0.973534	-4.44756	8.69e-06	4.91e-05
ENSG00000184838.14	PRR16	154.871	-4.31545	0.292734	-14.7418	3.47e-49	1.88e-47
ENSG00000145934.16	TENM2	80.6752	-4.30629	0.508046	-8.47618	2.33e-17	3.73e-16
ENSG00000169031.18	COL4A3	94.7371	-4.30567	0.528554	-8.14612	3.76e-16	5.55e-15
ENSG00000139220.16	PPFIA2	9.16292	-4.29855	1.22377	-3.51254	0.000443851	0.00189651
ENSG00000080823.21	MOK	1799.45	-4.28964	0.109809	-39.0646	0	0
ENSG00000005243.9	COPZ2	12.2065	-4.28535	1.177	-3.64092	0.000271664	0.00120734
ENSG00000183780.12	SLC35F3	111.608	-4.28031	0.342418	-12.5003	7.44e-36	2.67e-34
ENSG00000178685.13	PARP10	229.958	-4.27629	0.319562	-13.3817	7.73e-41	3.37e-39
ENSG00000179542.15	SLITRK4	28.4836	-4.26129	0.714062	-5.96767	2.41e-09	2.09e-08
ENSG00000171903.16	CYP4F11	64.5662	-4.25462	0.445037	-9.56013	1.18e-21	2.39e-20
ENSG00000152784.15	PRDM8	108.606	-4.25214	0.439327	-9.67877	3.71e-22	7.67e-21
ENSG00000188660.3	LINC00319	89.0597	-4.25133	0.40281	-10.5542	4.86e-26	1.2e-24
ENSG00000196549.10	MME	882.158	-4.24308	0.161286	-26.3078	1.56e-152	4.35e-150
ENSG00000248927.1	CTD-2334D19.1	6.69583	-4.22073	1.62335	-2.60001	0.00932207	0.0298241
ENSG00000154175.16	ABI3BP	2787.03	-4.2152	0.15452	-27.2793	7.46e-164	2.39e-161
ENSG00000124467.18	PSG8	25.5436	-4.18568	1.10876	-3.77509	0.000159949	0.000739102
ENSG00000275126.1	HIST1H4L	88.4983	-4.17058	0.331266	-12.5898	2.4e-36	8.8e-35
ENSG00000136573.12	BLK	12.1441	-4.16594	1.02582	-4.0611	4.88e-05	0.00024721
ENSG00000081923.11	ATP8B1	1687.95	-4.16425	0.134036	-31.068	6.51e-212	3.52e-209
ENSG00000257219.5	RP11-54A9.1	23.6756	-4.15404	0.628688	-6.60746	3.91e-11	3.98e-10
ENSG00000274588.1	DGKK	4.77427	-4.15317	1.75251	-2.36984	0.0177958	0.052313
ENSG00000269332.5	GOLGA2P9	3.9978	-4.15164	1.80774	-2.29659	0.0216422	0.0619378
ENSG00000223784.1	RP11-554I8.2	12.6229	-4.15127	0.841483	-4.93328	8.09e-07	5.26e-06
ENSG00000164125.15	FAM198B	26.2302	-4.13818	0.823233	-5.02674	4.99e-07	3.31e-06
ENSG00000269652.1	CTD-2195B23.3	10.958	-4.1372	1.17434	-3.523	0.000426684	0.00182927
ENSG00000094796.4	KRT31	3.19989	-4.13281	1.88372	-2.19396	0.0282383	0.0778081
ENSG00000242265.5	PEG10	631.939	-4.12754	0.177075	-23.3095	3.55e-120	7.14e-118
ENSG00000127585.11	FBXL16	563.338	-4.08965	0.195747	-20.8925	6.27e-97	8.86e-95
ENSG00000100097.11	LGALS1	2474.26	-4.08735	0.166524	-24.5452	4.87e-133	1.16e-130
ENSG00000126016.14	AMOT	1651.53	-4.07672	0.117294	-34.7564	1.11e-264	9.74e-262
ENSG00000146674.14	IGFBP3	1536.61	-4.07268	0.278573	-14.6198	2.1e-48	1.12e-46
ENSG00000280095.1	CH507-42P11.7	17.3934	-4.06722	0.873795	-4.65467	3.25e-06	1.95e-05
ENSG00000225222.2	CHCHD4P5	8.25692	-4.06064	1.6058	-2.52873	0.0114475	0.0357621
ENSG00000175302.5	ANKRD30BP1	7.11571	-4.05432	1.62038	-2.50208	0.0123468	0.0381604
ENSG00000074416.13	MGLL	2695.78	-4.04031	0.181874	-22.2149	2.47e-109	4.31e-107
ENSG00000204065.2	TCEAL5	7.85367	-4.0348	1.21816	-3.3122	0.000925665	0.00373036
ENSG00000101333.16	PLCB4	1273.96	-4.01939	0.119259	-33.7032	5.2e-249	3.95e-246
ENSG00000081052.11	COL4A4	188.389	-4.01596	0.281188	-14.2821	2.83e-46	1.42e-44
ENSG00000237548.1	TTLL11-IT1	7.62564	-4.01131	1.06602	-3.76287	0.000167973	0.00077313
ENSG00000138347.15	MYPN	201.989	-4.00109	0.240606	-16.6292	4.28e-62	3.18e-60
ENSG00000047230.14	CTPS2	130.085	-3.98421	0.318743	-12.4998	7.49e-36	2.69e-34
ENSG00000144230.16	GPR17	17.232	-3.97931	0.745249	-5.33956	9.32e-08	6.78e-07
ENSG00000204397.7	CARD16	12.5774	-3.96968	0.99523	-3.9887	6.64e-05	0.000328452
ENSG00000107165.12	TYRP1	4.8722	-3.95975	1.67437	-2.36492	0.0180339	0.0529133
ENSG00000134516.15	DOCK2	11.2621	-3.9573	1.0103	-3.91697	8.97e-05	0.000434241
ENSG00000249695.6	RP11-598F7.4	2.52735	-3.93568	1.97559	-1.99215	0.0463548	0.118319
ENSG00000005884.17	ITGA3	3841.1	-3.92465	0.086536	-45.3528	0	0
ENSG00000258667.1	HIF1A-AS2	52.0337	-3.91938	0.514615	-7.61615	2.61e-14	3.44e-13
ENSG00000119888.10	EPCAM	30.5328	-3.91373	0.660747	-5.9232	3.16e-09	2.71e-08
ENSG00000260910.1	LINC00565	8.86072	-3.91176	0.977707	-4.00095	6.31e-05	0.000313174
ENSG00000239627.3	RPL12P20	16.7677	-3.89652	0.96992	-4.01736	5.89e-05	0.000294279
ENSG00000080224.17	EPHA6	10.8044	-3.88537	1.18742	-3.2721	0.0010675	0.00424602
ENSG00000072415.8	MPP5	3399.19	-3.87907	0.0810729	-47.8467	0	0
ENSG00000049192.14	ADAMTS6	674.51	-3.87638	0.175842	-22.0447	1.07e-107	1.84e-105
ENSG00000160284.14	SPATC1L	61.9594	-3.86913	0.47523	-8.14161	3.9e-16	5.76e-15
ENSG00000114251.13	WNT5A	1128.6	-3.85246	0.116064	-33.1925	1.38e-241	1.02e-238
ENSG00000259498.1	RP11-244F12.3	52.6989	-3.84987	0.523368	-7.35595	1.9e-13	2.34e-12
ENSG00000280179.1	CH507-42P11.6	86.051	-3.84747	0.383361	-10.0362	1.06e-23	2.36e-22
ENSG00000123342.15	MMP19	25.0163	-3.84277	0.706887	-5.43619	5.44e-08	4.08e-07
ENSG00000182901.16	RGS7	23.1185	-3.83323	0.679146	-5.64419	1.66e-08	1.33e-07
ENSG00000138685.12	FGF2	1802.03	-3.83142	0.22978	-16.6743	2.02e-62	1.52e-60
ENSG00000164430.15	MB21D1	305.787	-3.82721	0.193956	-19.7324	1.14e-86	1.34e-84
ENSG00000042493.15	CAPG	497.131	-3.82423	0.175917	-21.7388	8.82e-105	1.43e-102
ENSG00000237870.6	AC073130.1	77.6488	-3.81038	0.345911	-11.0155	3.22e-28	8.69e-27
ENSG00000100311.16	PDGFB	320.724	-3.80905	0.191015	-19.9412	1.79e-88	2.23e-86
ENSG00000188487.11	INSC	82.1795	-3.80074	0.324681	-11.7061	1.19e-31	3.68e-30
ENSG00000134369.15	NAV1	2448.01	-3.79871	0.0890273	-42.669	0	0
ENSG00000167767.13	KRT80	226.682	-3.77976	0.202207	-18.6925	5.7e-78	5.89e-76
ENSG00000214944.9	ARHGEF28	1523.95	-3.77882	0.121324	-31.1466	5.63e-213	3.11e-210
ENSG00000105929.15	ATP6V0A4	29.515	-3.77493	0.586104	-6.44071	1.19e-10	1.16e-09
ENSG00000205420.10	KRT6A	14.4331	-3.77309	0.737523	-5.11588	3.12e-07	2.13e-06
ENSG00000146858.7	ZC3HAV1L	120.444	-3.76933	0.301047	-12.5207	5.75e-36	2.08e-34
ENSG00000008300.15	CELSR3	211.983	-3.76816	0.259911	-14.4979	1.25e-47	6.54e-46
ENSG00000167642.12	SPINT2	715.94	-3.76297	0.212655	-17.6952	4.57e-70	4.05e-68
ENSG00000244586.1	WNT5A-AS1	60.6677	-3.75751	0.413105	-9.09579	9.39e-20	1.71e-18
ENSG00000278272.1	HIST1H3C	321.768	-3.7512	0.174595	-21.4852	2.14e-102	3.3e-100
ENSG00000180914.10	OXTR	1017.4	-3.74827	0.180348	-20.7836	6.09e-96	8.49e-94
ENSG00000141574.7	SECTM1	59.8002	-3.74599	0.462421	-8.10082	5.46e-16	8e-15
ENSG00000139926.15	FRMD6	3278.64	-3.7363	0.0896766	-41.6642	0	0
ENSG00000148677.6	ANKRD1	1640.32	-3.72887	0.108387	-34.4034	2.24e-259	1.91e-256
ENSG00000270607.1	RP11-359E10.1	27.1103	-3.71966	0.546717	-6.80364	1.02e-11	1.09e-10
ENSG00000249216.1	RP11-227F19.5	5.68208	-3.71413	1.2844	-2.89173	0.0038313	0.0134855
ENSG00000019549.8	SNAI2	192.736	-3.70597	0.228887	-16.1913	5.81e-59	4.01e-57
ENSG00000000971.15	CFH	81.3713	-3.69538	0.404696	-9.13125	6.77e-20	1.24e-18
ENSG00000107984.9	DKK1	1377.45	-3.69353	0.11367	-32.4934	1.32e-231	9.3e-229
ENSG00000248905.8	FMN1	432.201	-3.68096	0.164851	-22.329	1.93e-110	3.46e-108
ENSG00000277270.1	RP5-827E24.1	6.63103	-3.67677	1.09869	-3.3465	0.000818393	0.00333532
ENSG00000170468.7	C14orf169	108.793	-3.67677	0.292025	-12.5906	2.38e-36	8.73e-35
ENSG00000123388.4	HOXC11	49.585	-3.67517	0.435062	-8.44747	2.98e-17	4.74e-16
ENSG00000118263.14	KLF7	310.165	-3.66757	0.187937	-19.5149	8.2e-85	9.45e-83
ENSG00000137965.10	IFI44	11.6323	-3.6639	1.17716	-3.11249	0.00185516	0.00700095
ENSG00000104518.10	GSDMD	191.751	-3.65718	0.245737	-14.8825	4.28e-50	2.41e-48
ENSG00000176532.3	PRR15	64.5014	-3.65222	0.359797	-10.1508	3.29e-24	7.56e-23
ENSG00000180287.16	PLD5	46.8589	-3.62299	0.424745	-8.52979	1.47e-17	2.37e-16
ENSG00000160207.8	HSF2BP	398.899	-3.62142	0.193609	-18.7048	4.53e-78	4.72e-76
ENSG00000163565.18	IFI16	514.258	-3.61416	0.245101	-14.7456	3.28e-49	1.78e-47
ENSG00000187210.12	GCNT1	391.705	-3.6138	0.160706	-22.487	5.57e-112	1.02e-109
ENSG00000132669.12	RIN2	238.645	-3.61035	0.218696	-16.5085	3.19e-61	2.32e-59
ENSG00000196159.11	FAT4	1042.09	-3.6073	0.114615	-31.4733	2.01e-217	1.18e-214
ENSG00000154188.9	ANGPT1	100.072	-3.5967	0.284212	-12.655	1.05e-36	3.91e-35
ENSG00000133321.10	RARRES3	4.57236	-3.5906	1.69311	-2.12071	0.033946	0.0911001
ENSG00000164692.17	COL1A2	193.343	-3.5906	0.44708	-8.03121	9.65e-16	1.39e-14
ENSG00000156587.15	UBE2L6	207.943	-3.57244	0.295065	-12.1073	9.66e-34	3.25e-32
ENSG00000107105.14	ELAVL2	142.369	-3.5612	0.254018	-14.0195	1.18e-44	5.65e-43
ENSG00000074527.11	NTN4	1230.33	-3.55237	0.146229	-24.2932	2.31e-130	5.29e-128
ENSG00000279250.1	RP11-46D1.2	6.79825	-3.55125	1.25972	-2.81908	0.00481612	0.0165483
ENSG00000189410.11	SH2D5	252.316	-3.5435	0.2659	-13.3264	1.63e-40	6.98e-39
ENSG00000156510.12	HKDC1	7.56002	-3.54134	1.26409	-2.8015	0.00508658	0.0173884
ENSG00000211448.11	DIO2	36.0366	-3.54053	0.460775	-7.68386	1.54e-14	2.07e-13
ENSG00000121552.3	CSTA	59.8589	-3.54043	0.519974	-6.80886	9.84e-12	1.05e-10
ENSG00000108342.12	CSF3	10.8115	-3.53671	0.821715	-4.30406	1.68e-05	9.11e-05
ENSG00000075223.13	SEMA3C	564.875	-3.5354	0.161982	-21.8259	1.32e-105	2.18e-103
ENSG00000105974.11	CAV1	2772.51	-3.53469	0.0858356	-41.1798	0	0
ENSG00000250697.1	CTD-2066L21.3	10.1569	-3.52574	0.883219	-3.99191	6.55e-05	0.000324495
ENSG00000240032.1	RP11-274H2.3	30.9464	-3.52333	0.540363	-6.5203	7.02e-11	6.98e-10
ENSG00000152952.11	PLOD2	3432.71	-3.52161	0.100534	-35.0291	8.12e-269	7.37e-266
ENSG00000012171.18	SEMA3B	498.844	-3.51967	0.203468	-17.2984	4.83e-67	4e-65
ENSG00000231528.2	FAM225A	22.3163	-3.51244	0.588796	-5.96547	2.44e-09	2.11e-08
ENSG00000189280.3	GJB5	15.4453	-3.50565	0.809063	-4.33298	1.47e-05	8.06e-05
ENSG00000122176.10	FMOD	30.8368	-3.50406	0.929576	-3.76953	0.000163558	0.000754661
ENSG00000054277.13	OPN3	110.413	-3.50136	0.294665	-11.8825	1.46e-32	4.68e-31
ENSG00000279602.1	CTD-3014M21.1	23.635	-3.50054	0.565547	-6.18965	6.03e-10	5.54e-09
ENSG00000141338.13	ABCA8	157.977	-3.48528	0.241515	-14.4309	3.31e-47	1.71e-45
ENSG00000151012.13	SLC7A11	2753.81	-3.47802	0.0979173	-35.52	2.42e-276	2.34e-273
ENSG00000228868.3	MYLKP1	29.1584	-3.45823	0.82486	-4.19251	2.76e-05	0.000144955
ENSG00000230082.1	PRRT3-AS1	9.18572	-3.457	0.95209	-3.63096	0.000282374	0.00125178
ENSG00000018408.14	WWTR1	3716.28	-3.45601	0.0803966	-42.9871	0	0
ENSG00000183668.17	PSG9	24.1616	-3.45479	0.944487	-3.65784	0.000254345	0.00113756
ENSG00000185479.5	KRT6B	16.0216	-3.45192	0.673163	-5.12791	2.93e-07	2e-06
ENSG00000006059.3	KRT33A	5.9021	-3.44582	1.67414	-2.05826	0.0395648	0.103581
ENSG00000205663.5	RP11-706O15.5	84.8638	-3.44288	0.358569	-9.60172	7.86e-22	1.6e-20
ENSG00000267269.1	RP11-2N1.1	28.0137	-3.44259	0.584255	-5.89227	3.81e-09	3.23e-08
ENSG00000072163.19	LIMS2	295.706	-3.44084	0.213053	-16.1502	1.13e-58	7.75e-57
ENSG00000163359.15	COL6A3	286.203	-3.43774	0.172367	-19.9443	1.68e-88	2.1e-86
ENSG00000248257.7	PSG10P	11.3476	-3.43331	1.60998	-2.13251	0.0329646	0.0889158
ENSG00000115648.13	MLPH	216.914	-3.42922	0.239227	-14.3346	1.33e-46	6.76e-45
ENSG00000196526.10	AFAP1	2975.41	-3.41177	0.0930607	-36.6618	2.97e-294	2.99e-291
ENSG00000205358.3	MT1H	28.8039	-3.40927	0.530492	-6.42662	1.3e-10	1.27e-09
ENSG00000137767.13	SQRDL	105.538	-3.40558	0.334171	-10.1911	2.17e-24	5.05e-23
ENSG00000263343.1	RP11-388M20.7	13.0069	-3.40523	0.947067	-3.59555	0.000323706	0.00141758
ENSG00000137936.16	BCAR3	845.086	-3.39725	0.122532	-27.7253	3.46e-169	1.23e-166
ENSG00000134339.8	SAA2	91.3708	-3.3947	0.301409	-11.2628	2e-29	5.66e-28
ENSG00000138829.11	FBN2	17459.7	-3.39183	0.0637254	-53.2257	0	0
ENSG00000140368.12	PSTPIP1	92.3819	-3.39002	0.319964	-10.595	3.14e-26	7.76e-25
ENSG00000268894.6	PLCE1-AS1	23.6961	-3.37954	0.589237	-5.73545	9.73e-09	7.94e-08
ENSG00000204767.3	FAM196B	13.8327	-3.36689	0.84009	-4.00777	6.13e-05	0.000305069
ENSG00000179242.15	CDH4	651.755	-3.36557	0.133796	-25.1546	1.26e-139	3.19e-137
ENSG00000276786.1	WI2-8325B5.1	15.6198	-3.36517	0.70691	-4.7604	1.93e-06	1.19e-05
ENSG00000107159.12	CA9	4.0383	-3.36256	1.38887	-2.42108	0.0154745	0.0463905
ENSG00000198753.11	PLXNB3	56.083	-3.35351	0.486784	-6.8891	5.61e-12	6.14e-11
ENSG00000115414.18	FN1	11049.9	-3.34355	0.0649488	-51.4798	0	0
ENSG00000183943.5	PRKX	333.115	-3.34215	0.179184	-18.6521	1.21e-77	1.25e-75
ENSG00000162006.9	MSLNL	5.24108	-3.34178	1.72611	-1.93602	0.0528652	0.131852
ENSG00000162711.16	NLRP3	70.0169	-3.33606	0.333358	-10.0075	1.41e-23	3.14e-22
ENSG00000242861.1	RP11-285F7.2	8.29023	-3.33395	1.6406	-2.03215	0.0421389	0.109213
ENSG00000262801.5	U91319.1	4.31409	-3.32226	1.7298	-1.9206	0.0547821	0.135838
ENSG00000236714.1	AC005592.1	18.6261	-3.31498	1.56499	-2.11822	0.0341564	0.0915861
ENSG00000249867.5	RP11-115J23.1	66.9021	-3.31492	0.38086	-8.70379	3.21e-18	5.37e-17
ENSG00000214517.9	PPME1	5877.67	-3.3047	0.0719652	-45.9208	0	0
ENSG00000260781.1	ARHGAP23P1	48.1576	-3.30236	0.443756	-7.44183	9.93e-14	1.25e-12
ENSG00000205108.5	FAM205A	10.9544	-3.29996	1.60086	-2.06137	0.0392677	0.102928
ENSG00000251203.1	RP11-14I17.1	6.95042	-3.28906	1.65219	-1.99073	0.0465106	0.118652
ENSG00000243701.5	DUBR	393.426	-3.28474	0.157963	-20.7944	4.87e-96	6.81e-94
ENSG00000233695.2	GAS6-AS1	212.636	-3.26941	0.230184	-14.2035	8.72e-46	4.3e-44
ENSG00000256268.1	RP11-221N13.3	5.70988	-3.26861	1.17552	-2.78057	0.00542637	0.0184424
ENSG00000157227.12	MMP14	1244.4	-3.26686	0.135247	-24.1548	6.65e-129	1.5e-126
ENSG00000240775.1	RP11-170N16.2	30.7082	-3.25853	0.827905	-3.93587	8.29e-05	0.000402949
ENSG00000166801.15	FAM111A	459.494	-3.25036	0.147354	-22.0581	7.98e-108	1.38e-105
ENSG00000178726.6	THBD	344.069	-3.24055	0.16852	-19.2295	2.1e-82	2.32e-80
ENSG00000175707.8	KDF1	14.1904	-3.23618	0.715215	-4.52477	6.05e-06	3.49e-05
ENSG00000078018.19	MAP2	84.2827	-3.23573	0.343205	-9.42798	4.18e-21	8.23e-20
ENSG00000101460.12	MAP1LC3A	27.7134	-3.23525	0.67202	-4.81422	1.48e-06	9.26e-06
ENSG00000186676.3	EEF1GP1	121.035	-3.23318	0.312257	-10.3542	4e-25	9.52e-24
ENSG00000153406.13	NMRAL1	161.053	-3.23285	0.245023	-13.1941	9.49e-40	3.95e-38
ENSG00000196878.13	LAMB3	1689.97	-3.21457	0.102279	-31.4294	8.01e-217	4.51e-214
ENSG00000172717.15	FAM71D	43.1991	-3.21368	0.407137	-7.89336	2.94e-15	4.12e-14
ENSG00000197182.13	MIRLET7BHG	277.655	-3.20691	0.184147	-17.4149	6.36e-68	5.31e-66
ENSG00000241943.2	RN7SL188P	2.30713	-3.18053	2.03754	-1.56097	0.118531	0.253464
ENSG00000129474.15	AJUBA	1951.33	-3.17926	0.110223	-28.8438	6.06e-183	2.58e-180
ENSG00000177409.11	SAMD9L	12.4699	-3.17694	0.790183	-4.02051	5.81e-05	0.000290478
ENSG00000162840.4	MT2P1	99.0112	-3.16443	0.496999	-6.36707	1.93e-10	1.85e-09
ENSG00000250033.5	SLC7A11-AS1	90.4753	-3.15696	0.310179	-10.1779	2.49e-24	5.77e-23
ENSG00000233967.6	RP11-250B2.3	4.0163	-3.15508	1.92287	-1.64082	0.100835	0.223135
ENSG00000226876.2	RP11-36N20.1	6.74244	-3.14201	1.66134	-1.89125	0.0585904	0.143386
ENSG00000183150.7	GPR19	7.98337	-3.1411	0.917897	-3.42207	0.000621468	0.00259554
ENSG00000228919.5	AC097381.1	18.5226	-3.13956	0.756357	-4.1509	3.31e-05	0.000171978
ENSG00000277203.1	F8A1	30.6576	-3.13872	0.506332	-6.19894	5.68e-10	5.24e-09
ENSG00000157168.18	NRG1	645.178	-3.12846	0.127722	-24.4942	1.7e-132	4.03e-130
ENSG00000226496.2	LINC00323	2.81058	-3.12678	2.0137	-1.55275	0.120482	0.25662
ENSG00000065325.12	GLP2R	13.3234	-3.12104	0.784883	-3.97644	7e-05	0.000344223
ENSG00000274354.1	RP11-1151B14.5	6.04602	-3.11974	1.29548	-2.40817	0.0160325	0.0478442
ENSG00000119900.7	OGFRL1	3849.86	-3.11474	0.0821113	-37.9331	0	0
ENSG00000125148.6	MT2A	6473.29	-3.11378	0.293876	-10.5955	3.13e-26	7.72e-25
ENSG00000146376.10	ARHGAP18	624.442	-3.11234	0.136128	-22.8634	1.08e-115	2.05e-113
ENSG00000153930.11	ANKFN1	21.4632	-3.10683	0.791944	-3.92305	8.74e-05	0.000424011
ENSG00000182179.11	UBA7	60.3828	-3.10188	0.510266	-6.07896	1.21e-09	1.08e-08
ENSG00000197506.7	SLC28A3	2.5175	-3.09939	2.96174	-1.04648	0.295341	0.493665
ENSG00000267056.2	AC005336.4	11.0723	-3.09617	0.859795	-3.60106	0.000316921	0.00138995
ENSG00000239828.6	RP11-446H18.5	13.7441	-3.0619	1.00451	-3.04815	0.00230258	0.00850578
ENSG00000182240.15	BACE2	1292.99	-3.0456	0.114892	-26.5083	7.78e-155	2.23e-152
ENSG00000164176.12	EDIL3	436.561	-3.04232	0.159399	-19.0862	3.29e-81	3.6e-79
ENSG00000099984.11	GSTT2	32.1945	-3.04028	0.494954	-6.14254	8.12e-10	7.36e-09
ENSG00000171161.12	ZNF672	366.897	-3.03934	0.167702	-18.1235	2.08e-73	2e-71
ENSG00000148426.12	PROSER2	727.34	-3.03625	0.131581	-23.0752	8.22e-118	1.61e-115
ENSG00000181481.13	RNF135	190.675	-3.02219	0.241225	-12.5285	5.21e-36	1.89e-34
ENSG00000162511.7	LAPTM5	11.9275	-3.01913	0.875404	-3.44885	0.000562986	0.00236816
ENSG00000236581.8	STARD13-AS	113.657	-3.0124	0.252566	-11.9272	8.54e-33	2.78e-31
ENSG00000149451.17	ADAM33	147.167	-3.01115	0.344728	-8.73486	2.44e-18	4.12e-17
ENSG00000163697.16	APBB2	1449.97	-2.99869	0.0984408	-30.4618	8.35e-204	3.98e-201
ENSG00000137393.9	RNF144B	297.574	-2.98659	0.199476	-14.9722	1.12e-50	6.38e-49
ENSG00000155816.19	FMN2	1139.78	-2.98271	0.110176	-27.0723	2.09e-161	6.45e-159
ENSG00000175137.10	SH3BP5L	394.871	-2.98041	0.148317	-20.0949	8.17e-90	1.05e-87
ENSG00000150938.9	CRIM1	9902.13	-2.97526	0.0725888	-40.9879	0	0
ENSG00000135362.13	PRR5L	334.183	-2.97041	0.155203	-19.1389	1.2e-81	1.32e-79
ENSG00000136153.19	LMO7	842.757	-2.96828	0.114138	-26.006	4.23e-149	1.15e-146
ENSG00000155324.9	GRAMD3	199.893	-2.96182	0.248486	-11.9195	9.37e-33	3.03e-31
ENSG00000101335.9	MYL9	326.688	-2.96101	0.180165	-16.435	1.07e-60	7.73e-59
ENSG00000228630.5	HOTAIR	12.4018	-2.96089	0.802277	-3.6906	0.000223723	0.00100991
ENSG00000175497.16	DPP10	16.2113	-2.95175	0.661375	-4.46305	8.08e-06	4.59e-05
ENSG00000138271.5	GPR87	45.0243	-2.94312	0.400484	-7.34892	2e-13	2.46e-12
ENSG00000153207.14	AHCTF1	2194.81	-2.94306	0.0858514	-34.2808	1.52e-257	1.26e-254
ENSG00000280269.1	AP000577.2	85.5392	-2.93751	0.284813	-10.3138	6.1e-25	1.44e-23
ENSG00000151364.16	KCTD14	16.8693	-2.935	0.6156	-4.76771	1.86e-06	1.15e-05
ENSG00000188223.9	AC002398.9	11.723	-2.93469	1.20812	-2.42914	0.0151345	0.0455265
ENSG00000235121.1	RP11-90L20.2	21.1828	-2.93217	0.602682	-4.86521	1.14e-06	7.29e-06
ENSG00000261534.1	RP11-244O19.1	90.4499	-2.93087	0.270552	-10.8329	2.4e-27	6.2e-26
ENSG00000188580.13	NKAIN2	7.36077	-2.93025	1.08956	-2.68939	0.00715828	0.0235687
ENSG00000160886.13	LY6K	316.965	-2.9184	0.175386	-16.6399	3.58e-62	2.67e-60
ENSG00000231924.9	PSG1	43.0476	-2.91661	0.643097	-4.53526	5.75e-06	3.33e-05
ENSG00000173401.9	GLIPR1L1	4.09924	-2.91592	1.80031	-1.61967	0.105303	0.231041
ENSG00000145632.14	PLK2	4861.09	-2.91428	0.0852639	-34.1795	4.88e-256	3.92e-253
ENSG00000041515.15	MYO16	12.6493	-2.903	0.757712	-3.83127	0.000127484	0.00059972
ENSG00000260823.1	RP11-249C24.10	3.77696	-2.89204	1.3036	-2.21851	0.02652	0.0737376
ENSG00000150556.16	LYPD6B	159.908	-2.89156	0.251468	-11.4987	1.34e-30	3.98e-29
ENSG00000166396.12	SERPINB7	9.26255	-2.88488	0.898875	-3.20943	0.00132997	0.00517156
ENSG00000081803.15	CADPS2	227.012	-2.88469	0.218461	-13.2046	8.25e-40	3.45e-38
ENSG00000229372.1	SZT2-AS1	4.18401	-2.88329	1.44469	-1.99578	0.0459576	0.117465
ENSG00000185420.18	SMYD3	344.75	-2.88313	0.185376	-15.5529	1.52e-54	9.45e-53
ENSG00000143653.9	SCCPDH	853.899	-2.88242	0.116165	-24.8133	6.44e-136	1.56e-133
ENSG00000183023.18	SLC8A1	271.074	-2.87994	0.175788	-16.3831	2.53e-60	1.8e-58
ENSG00000163171.7	CDC42EP3	1280.24	-2.87715	0.0981533	-29.3128	7.12e-189	3.08e-186
ENSG00000205364.3	MT1M	11.3201	-2.87294	0.746351	-3.84931	0.00011845	0.000560408
ENSG00000122420.9	PTGFR	43.2103	-2.87289	0.687737	-4.17731	2.95e-05	0.000154235
ENSG00000143127.12	ITGA10	82.5636	-2.86786	0.305159	-9.39793	5.56e-21	1.09e-19
ENSG00000070404.9	FSTL3	1343.33	-2.86693	0.104064	-27.5498	4.45e-167	1.55e-164
ENSG00000269416.5	LINC01224	94.9011	-2.86187	0.272346	-10.5082	7.92e-26	1.92e-24
ENSG00000059378.12	PARP12	145.075	-2.86045	0.256287	-11.1611	6.32e-29	1.75e-27
ENSG00000115756.12	HPCAL1	1069.34	-2.84854	0.105419	-27.0212	8.32e-161	2.55e-158
ENSG00000001617.11	SEMA3F	552.037	-2.84755	0.143603	-19.8294	1.66e-87	2.01e-85
ENSG00000205662.2	RP11-706O15.7	23.3457	-2.84172	0.585987	-4.84945	1.24e-06	7.85e-06
ENSG00000267279.1	RP11-879F14.2	16.1842	-2.84061	0.633404	-4.48468	7.3e-06	4.17e-05
ENSG00000076706.15	MCAM	1205.13	-2.83718	0.105305	-26.9424	7.01e-160	2.12e-157
ENSG00000113739.10	STC2	1784.49	-2.83662	0.104476	-27.1508	2.47e-162	7.82e-160
ENSG00000065534.18	MYLK	2454.27	-2.8355	0.0955714	-29.6689	1.93e-193	8.78e-191
ENSG00000205664.10	RP11-706O15.1	192.614	-2.82174	0.214242	-13.1708	1.29e-39	5.34e-38
ENSG00000008394.12	MGST1	1248.78	-2.81712	0.105371	-26.7352	1.84e-157	5.38e-155
ENSG00000274667.1	RP11-31H5.3	6.40503	-2.8136	1.13882	-2.47063	0.0134874	0.0411724
ENSG00000163347.5	CLDN1	449.261	-2.81109	0.193605	-14.5197	9.09e-48	4.77e-46
ENSG00000216740.2	ANXA2P3	47.1271	-2.80847	0.402415	-6.97904	2.97e-12	3.31e-11
ENSG00000047648.21	ARHGAP6	21.0906	-2.80795	0.706207	-3.97609	7.01e-05	0.000344601
ENSG00000140416.19	TPM1	1842.18	-2.79985	0.0914134	-30.6285	5.11e-206	2.52e-203
ENSG00000204071.10	TCEAL6	14.6928	-2.79465	0.741673	-3.76803	0.000164542	0.000758952
ENSG00000169047.5	IRS1	1547.77	-2.79238	0.0902648	-30.9354	3.99e-210	2.08e-207
ENSG00000187653.11	TMSB4XP8	38.3987	-2.78755	0.544078	-5.12344	3e-07	2.05e-06
ENSG00000197415.11	VEPH1	41.4759	-2.78487	0.454207	-6.13127	8.72e-10	7.87e-09
ENSG00000138395.14	CDK15	23.915	-2.78312	0.571247	-4.872	1.1e-06	7.05e-06
ENSG00000231991.4	ANXA2P2	2138.67	-2.77862	0.0993149	-27.9779	3.02e-172	1.13e-169
ENSG00000158089.14	GALNT14	73.3857	-2.77763	0.31641	-8.77857	1.66e-18	2.83e-17
ENSG00000133433.10	GSTT2B	37.7069	-2.77519	0.449714	-6.17101	6.79e-10	6.2e-09
ENSG00000143382.14	ADAMTSL4	600.538	-2.76795	0.171487	-16.1408	1.32e-58	9e-57
ENSG00000168528.11	SERINC2	408.883	-2.76584	0.148914	-18.5733	5.28e-77	5.41e-75
ENSG00000277150.1	F8A3	30.1224	-2.7623	0.472868	-5.84159	5.17e-09	4.33e-08
ENSG00000138623.9	SEMA7A	636.375	-2.76215	0.238373	-11.5875	4.77e-31	1.44e-29
ENSG00000079263.18	SP140	12.3856	-2.75487	0.763629	-3.6076	0.000309041	0.00135908
ENSG00000134013.15	LOXL2	3514.31	-2.75237	0.175408	-15.6912	1.74e-55	1.09e-53
ENSG00000196507.10	TCEAL3	153.618	-2.75087	0.251369	-10.9436	7.13e-28	1.9e-26
ENSG00000099994.10	SUSD2	60.4084	-2.74894	0.389973	-7.04905	1.8e-12	2.05e-11
ENSG00000249055.1	TBCAP3	4.30788	-2.74874	1.77028	-1.55272	0.120491	0.25662
ENSG00000140945.16	CDH13	963.225	-2.74591	0.125741	-21.8378	1.01e-105	1.69e-103
ENSG00000239648.1	MTND1P3	7.58182	-2.71587	1.67592	-1.62052	0.105121	0.230694
ENSG00000277304.1	RP11-989E6.13	50.9513	-2.71507	0.391807	-6.9296	4.22e-12	4.65e-11
ENSG00000257198.6	FAM205BP	5.02069	-2.71474	1.72698	-1.57195	0.115961	0.249276
ENSG00000182718.16	ANXA2	14547.1	-2.71367	0.0852399	-31.8357	2.08e-222	1.33e-219
ENSG00000146966.12	DENND2A	565.975	-2.71283	0.154321	-17.5791	3.56e-69	3.08e-67
ENSG00000226121.2	AC009487.6	685.783	-2.71235	0.121846	-22.2605	8.93e-110	1.59e-107
ENSG00000116977.18	LGALS8	823.873	-2.70994	0.119156	-22.7428	1.69e-114	3.15e-112
ENSG00000110203.8	FOLR3	5.5473	-2.70796	1.71924	-1.57509	0.115235	0.248048
ENSG00000199805.1	RNU1-134P	43.9851	-2.7063	0.37887	-7.14309	9.13e-13	1.06e-11
ENSG00000043143.20	JADE2	979.378	-2.703	0.104261	-25.9252	3.46e-148	9.19e-146
ENSG00000234155.1	RP11-30P6.6	6.04465	-2.70194	1.02278	-2.64177	0.00824751	0.0267512
ENSG00000161267.11	BDH1	283.375	-2.70085	0.17767	-15.2015	3.46e-52	2.04e-50
ENSG00000248719.1	RP11-377G16.2	5.0136	-2.70073	1.74999	-1.54329	0.122761	0.26049
ENSG00000261115.5	TMEM178B	261.376	-2.69802	0.188488	-14.314	1.79e-46	9e-45
ENSG00000282057.1	RP4-621F18.2	72.5623	-2.69794	0.309675	-8.71216	2.98e-18	5e-17
ENSG00000166828.2	SCNN1G	11.6715	-2.69318	0.73917	-3.64351	0.000268943	0.00119676
ENSG00000183722.7	LHFP	324.69	-2.69261	0.187811	-14.3368	1.29e-46	6.57e-45
ENSG00000278588.1	HIST1H2BI	219.92	-2.68892	0.200887	-13.3852	7.38e-41	3.23e-39
ENSG00000146054.17	TRIM7	228.88	-2.68809	0.207722	-12.9408	2.65e-38	1.05e-36
ENSG00000213761.4	MT1P1	116.621	-2.6863	0.418126	-6.42462	1.32e-10	1.29e-09
ENSG00000215845.10	TSTD1	31.2828	-2.68306	0.567736	-4.72589	2.29e-06	1.4e-05
ENSG00000157064.10	NMNAT2	80.0337	-2.68212	0.358901	-7.47315	7.83e-14	9.94e-13
ENSG00000169083.15	AR	161.414	-2.67964	0.230943	-11.603	3.98e-31	1.21e-29
ENSG00000137962.12	ARHGAP29	2701.03	-2.67946	0.0820587	-32.653	7.27e-234	5.25e-231
ENSG00000276651.1	AC007950.2	4.81417	-2.67876	1.21646	-2.2021	0.0276584	0.0764647
ENSG00000125730.16	C3	419.182	-2.67308	0.168059	-15.9056	5.79e-57	3.8e-55
ENSG00000123560.13	PLP1	11.6693	-2.67126	1.05491	-2.53222	0.0113342	0.0354474
ENSG00000163661.3	PTX3	546.762	-2.66732	0.158534	-16.825	1.6e-63	1.25e-61
ENSG00000275832.4	ARHGAP23	1122.09	-2.66729	0.106081	-25.1439	1.65e-139	4.11e-137
ENSG00000171552.12	BCL2L1	1137.84	-2.66599	0.110412	-24.1458	8.27e-129	1.85e-126
ENSG00000196196.2	HRCT1	21.5114	-2.66501	0.517622	-5.14857	2.62e-07	1.8e-06
ENSG00000133121.20	STARD13	544.885	-2.66446	0.145688	-18.2888	1.02e-74	1e-72
ENSG00000162267.12	ITIH3	18.5537	-2.66386	0.813287	-3.27542	0.00105503	0.00420118
ENSG00000162851.7	TFB2M	304.55	-2.6623	0.166756	-15.9652	2.23e-57	1.48e-55
ENSG00000169499.14	PLEKHA2	836.965	-2.66137	0.110244	-24.1407	9.34e-129	2.07e-126
ENSG00000229129.1	ACTG1P2	26.1965	-2.65864	0.528653	-5.0291	4.93e-07	3.27e-06
ENSG00000082482.13	KCNK2	15.0481	-2.65543	0.727972	-3.64771	0.000264593	0.00117964
ENSG00000065308.4	TRAM2	2076.83	-2.64608	0.102051	-25.929	3.14e-148	8.41e-146
ENSG00000179546.4	HTR1D	134.57	-2.64506	0.288369	-9.17248	4.62e-20	8.54e-19
ENSG00000249035.6	CTB-113P19.1	19.7919	-2.64476	0.69257	-3.81875	0.000134128	0.000628034
ENSG00000125144.13	MT1G	92.3586	-2.64366	0.272686	-9.69488	3.17e-22	6.58e-21
ENSG00000231628.1	RP3-355L5.4	10.4709	-2.6424	0.881757	-2.99674	0.00272884	0.00992276
ENSG00000114698.14	PLSCR4	104.862	-2.6415	0.326103	-8.1002	5.49e-16	8.04e-15
ENSG00000176406.21	RIMS2	186.963	-2.63977	0.193461	-13.645	2.16e-42	9.8e-41
ENSG00000139985.6	ADAM21	17.594	-2.63689	0.627501	-4.20221	2.64e-05	0.000139322
ENSG00000214357.8	NEURL1B	253.016	-2.63604	0.199659	-13.2027	8.47e-40	3.53e-38
ENSG00000254387.1	MYL12AP1	50.8749	-2.63543	0.410327	-6.42276	1.34e-10	1.3e-09
ENSG00000123977.9	DAW1	44.2077	-2.62558	0.365805	-7.17753	7.1e-13	8.36e-12
ENSG00000270672.1	MTRNR2L6	14.399	-2.62497	1.40707	-1.86556	0.0621023	0.150581
ENSG00000230552.5	AC092162.1	11.23	-2.62469	0.741302	-3.54064	0.000399151	0.00171856
ENSG00000091483.6	FH	1309.33	-2.62158	0.098778	-26.5401	3.34e-155	9.68e-153
ENSG00000259828.1	RP11-63E9.1	7.37857	-2.62152	1.3229	-1.98164	0.0475193	0.120822
ENSG00000238286.1	SLC35E1P1	5.64534	-2.62096	1.1539	-2.2714	0.023123	0.0654369
ENSG00000185340.15	GAS2L1	309.162	-2.61846	0.158927	-16.4758	5.48e-61	3.97e-59
ENSG00000280109.1	PLAC4	399.309	-2.61688	0.17497	-14.9562	1.42e-50	8.07e-49
ENSG00000163888.3	CAMK2N2	25.693	-2.60929	0.54097	-4.82336	1.41e-06	8.87e-06
ENSG00000243137.7	PSG4	171.692	-2.60749	0.25364	-10.2803	8.65e-25	2.04e-23
ENSG00000142227.10	EMP3	434.751	-2.60646	0.143141	-18.209	4.38e-74	4.27e-72
ENSG00000134954.14	ETS1	1370.59	-2.60359	0.0990658	-26.2815	3.12e-152	8.62e-150
ENSG00000142871.16	CYR61	7427.81	-2.6035	0.0709831	-36.6777	1.66e-294	1.73e-291
ENSG00000023608.4	SNAPC1	617.343	-2.60202	0.142095	-18.3118	6.66e-75	6.6e-73
ENSG00000168209.4	DDIT4	1618.15	-2.59793	0.0957013	-27.1462	2.8e-162	8.77e-160
ENSG00000105383.14	CD33	78.3356	-2.59575	0.326862	-7.94141	2e-15	2.82e-14
ENSG00000275993.2	CH507-42P11.8	523.874	-2.59423	0.155349	-16.6994	1.32e-62	1e-60
ENSG00000185614.4	FAM212A	7.00332	-2.5913	1.02479	-2.52862	0.0114513	0.03577
ENSG00000136378.14	ADAMTS7	140.427	-2.59003	0.258403	-10.0232	1.21e-23	2.69e-22
ENSG00000249293.1	CTC-575I10.1	16.5454	-2.58802	0.770053	-3.36083	0.000777086	0.00318265
ENSG00000123700.4	KCNJ2	60.0491	-2.58653	0.343468	-7.53062	5.05e-14	6.5e-13
ENSG00000142798.17	HSPG2	3771.13	-2.58118	0.0803002	-32.1442	1.07e-226	6.98e-224
ENSG00000183378.11	OVCH2	2.72422	-2.58111	2.0922	-1.23368	0.217321	0.398952
ENSG00000237565.3	SSU72P5	2.96278	-2.58095	2.06735	-1.24843	0.211872	0.39193
ENSG00000213150.2	RP11-346C16.2	4.28687	-2.58051	1.95955	-1.31689	0.187875	0.359
ENSG00000275767.1	CH17-248H7.3	5.14426	-2.58038	1.93281	-1.33504	0.181863	0.350201
ENSG00000213406.3	ANXA2P1	182.587	-2.58037	0.214018	-12.0568	1.79e-33	5.94e-32
ENSG00000166833.19	NAV2	1973.55	-2.57989	0.0915416	-28.1827	9.53e-175	3.72e-172
ENSG00000178922.16	HYI	315.789	-2.57508	0.174074	-14.793	1.63e-49	8.91e-48
ENSG00000162078.11	ZG16B	8.02223	-2.57318	0.894612	-2.87631	0.00402353	0.014111
ENSG00000115594.11	IL1R1	135.965	-2.57151	0.228208	-11.2683	1.88e-29	5.32e-28
ENSG00000113140.10	SPARC	5673.69	-2.56745	0.258057	-9.94916	2.54e-23	5.57e-22
ENSG00000174611.11	KY	7.69987	-2.56739	0.950028	-2.70243	0.00688338	0.0227621
ENSG00000257261.5	RP11-96H19.1	15.0629	-2.56562	0.699941	-3.66548	0.000246879	0.00110769
ENSG00000185650.9	ZFP36L1	2105.87	-2.56543	0.091872	-27.924	1.37e-171	4.99e-169
ENSG00000101911.12	PRPS2	1156.36	-2.5646	0.107981	-23.7504	1.09e-124	2.27e-122
ENSG00000261471.1	RP11-61F12.1	23.5048	-2.56437	0.531501	-4.82477	1.4e-06	8.81e-06
ENSG00000152104.11	PTPN14	6322.58	-2.56389	0.0693548	-36.9678	3.77e-299	4.08e-296
ENSG00000267000.1	RP11-27G24.3	12.236	-2.55522	0.821688	-3.10971	0.00187269	0.00706236
ENSG00000140682.18	TGFB1I1	425.335	-2.55488	0.166435	-15.3506	3.51e-53	2.11e-51
ENSG00000183250.11	LINC01547	72.5688	-2.55436	0.295671	-8.6392	5.66e-18	9.32e-17
ENSG00000136997.15	MYC	1478.55	-2.55398	0.102006	-25.0376	2.38e-138	5.88e-136
ENSG00000243243.5	AC073130.3	15.8765	-2.54942	0.618785	-4.12005	3.79e-05	0.000195197
ENSG00000113389.15	NPR3	91.6168	-2.54554	0.334092	-7.61929	2.55e-14	3.36e-13
ENSG00000180448.10	ARHGAP45	541.844	-2.54396	0.138384	-18.3834	1.79e-75	1.78e-73
ENSG00000082497.11	SERTAD4	261.669	-2.54292	0.184951	-13.7492	5.15e-43	2.36e-41
ENSG00000233493.3	TMEM238	10.5516	-2.54031	0.789497	-3.21764	0.00129252	0.00504127
ENSG00000148154.9	UGCG	3975.73	-2.53881	0.0789129	-32.1722	4.32e-227	2.89e-224
ENSG00000276916.1	RP11-230F18.6	6.648	-2.53719	1.13133	-2.24265	0.0249194	0.0698464
ENSG00000131435.12	PDLIM4	287.622	-2.53693	0.170496	-14.8797	4.46e-50	2.51e-48
ENSG00000069424.14	KCNAB2	497.87	-2.53467	0.141482	-17.9151	8.99e-72	8.25e-70
ENSG00000205644.5	CTD-2375G15.1	30.5901	-2.53033	0.619964	-4.08141	4.48e-05	0.000227745
ENSG00000136010.13	ALDH1L2	1525.65	-2.52961	0.110871	-22.8158	3.19e-115	6.03e-113
ENSG00000126860.11	EVI2A	110.097	-2.52264	0.3428	-7.35891	1.85e-13	2.29e-12
ENSG00000058335.15	RASGRF1	154.505	-2.51593	0.230423	-10.9187	9.38e-28	2.48e-26
ENSG00000135083.14	CCNJL	141.87	-2.51168	0.229937	-10.9233	8.92e-28	2.36e-26
ENSG00000176978.13	DPP7	407.89	-2.5112	0.150545	-16.6807	1.81e-62	1.37e-60
ENSG00000139970.16	RTN1	172.551	-2.5099	0.20071	-12.5051	7e-36	2.52e-34
ENSG00000162714.12	ZNF496	1323.4	-2.50655	0.104987	-23.8748	5.59e-126	1.2e-123
ENSG00000179178.10	TMEM125	5.06108	-2.5056	1.79413	-1.39655	0.162549	0.322678
ENSG00000188643.10	S100A16	1256.49	-2.5034	0.180898	-13.8387	1.49e-43	6.9e-42
ENSG00000117226.11	GBP3	85.8473	-2.50195	0.294498	-8.49567	1.97e-17	3.17e-16
ENSG00000277050.1	RP11-102G14.1	10.859	-2.49612	0.758193	-3.2922	0.000994074	0.0039804
ENSG00000167912.5	RP11-25K19.1	8.48954	-2.49514	0.922782	-2.70393	0.00685243	0.0226837
ENSG00000230191.1	RP4-725G10.3	22.8848	-2.4936	0.578484	-4.31058	1.63e-05	8.86e-05
ENSG00000175592.8	FOSL1	1174.04	-2.493	0.251575	-9.90958	3.78e-23	8.21e-22
ENSG00000205362.11	MT1A	68.8338	-2.48917	0.316741	-7.8587	3.88e-15	5.39e-14
ENSG00000162777.16	DENND2D	27.1285	-2.48826	0.602178	-4.13209	3.59e-05	0.000185922
ENSG00000130147.15	SH3BP4	1371.66	-2.4841	0.0902214	-27.5333	7.01e-167	2.38e-164
ENSG00000220248.1	ZNF402P	6.69089	-2.47252	0.989876	-2.49781	0.0124964	0.0385509
ENSG00000163364.9	LINC01116	192.346	-2.47128	0.190893	-12.9459	2.48e-38	9.88e-37
ENSG00000135318.11	NT5E	876.739	-2.47006	0.131334	-18.8075	6.56e-79	6.94e-77
ENSG00000227671.4	RP11-488L18.4	257.48	-2.4677	0.17155	-14.3848	6.45e-47	3.3e-45
ENSG00000148450.12	MSRB2	106.735	-2.46662	0.262995	-9.37897	6.66e-21	1.3e-19
ENSG00000183840.6	GPR39	8.88615	-2.4656	0.796933	-3.09386	0.00197572	0.00741516
ENSG00000233820.2	RP11-535M15.2	5.95001	-2.46182	1.31486	-1.87231	0.0611638	0.148675
ENSG00000184374.2	COLEC10	13.3453	-2.45786	1.64602	-1.49321	0.135381	0.281432
ENSG00000165985.9	C1QL3	7.91628	-2.45571	0.884667	-2.77586	0.00550566	0.0186713
ENSG00000274238.1	RP11-115D19.3	6.31524	-2.45472	1.32291	-1.85554	0.0635194	0.153256
ENSG00000204941.13	PSG5	81.1973	-2.45461	0.452003	-5.43051	5.62e-08	4.2e-07
ENSG00000125378.15	BMP4	132.123	-2.45377	0.226208	-10.8474	2.05e-27	5.31e-26
ENSG00000260628.5	RP11-1166P10.1	45.3857	-2.45353	0.392208	-6.25568	3.96e-10	3.71e-09
ENSG00000188910.7	GJB3	23.8931	-2.45176	0.522835	-4.68935	2.74e-06	1.66e-05
ENSG00000186603.5	HPDL	14.9797	-2.45137	0.662724	-3.69894	0.000216506	0.000978432
ENSG00000160691.18	SHC1	2714.21	-2.44878	0.0978783	-25.0186	3.83e-138	9.38e-136
ENSG00000116260.16	QSOX1	4076.31	-2.44649	0.0855008	-28.6136	4.54e-180	1.85e-177
ENSG00000173166.17	RAPH1	514.274	-2.4448	0.148914	-16.4175	1.43e-60	1.03e-58
ENSG00000187037.8	GPR141	7.31519	-2.44338	1.00666	-2.42722	0.0152148	0.0457338
ENSG00000132554.19	RGS22	8.18609	-2.44289	0.923391	-2.64557	0.00815539	0.0264982
ENSG00000184995.7	IFNE	3.24061	-2.43873	1.8776	-1.29886	0.193994	0.367225
ENSG00000243896.3	OR2A7	6.23269	-2.43468	1.17298	-2.07563	0.0379284	0.100126
ENSG00000257635.2	RP11-536C10.10	6.86538	-2.42855	1.07315	-2.26302	0.0236345	0.0667301
ENSG00000197879.14	MYO1C	2729.71	-2.42811	0.0881449	-27.5468	4.83e-167	1.66e-164
ENSG00000237172.3	B3GNT9	96.6579	-2.4275	0.304663	-7.96783	1.61e-15	2.3e-14
ENSG00000273090.1	RP11-78I14.1	17.2388	-2.42731	0.788432	-3.07866	0.00207935	0.00776369
ENSG00000120833.13	SOCS2	181.089	-2.42501	0.207105	-11.7091	1.15e-31	3.56e-30
ENSG00000184709.7	LRRC26	4.66285	-2.42397	1.19261	-2.03249	0.0421037	0.109132
ENSG00000064666.14	CNN2	1329.8	-2.42363	0.11026	-21.981	4.38e-107	7.46e-105
ENSG00000181381.13	DDX60L	237.312	-2.4228	0.201488	-12.0245	2.64e-33	8.72e-32
ENSG00000101608.12	MYL12A	2073.15	-2.41854	0.100379	-24.094	2.89e-128	6.35e-126
ENSG00000279465.1	RP11-44D5.2	5.71892	-2.41473	1.01818	-2.37162	0.0177103	0.0521215
ENSG00000048540.14	LMO3	12.4789	-2.41377	0.679311	-3.55325	0.000380498	0.00164353
ENSG00000260604.2	RP1-140K8.5	66.3987	-2.41218	0.311077	-7.75429	8.88e-15	1.21e-13
ENSG00000273760.1	CH17-360D5.3	29.8752	-2.40957	0.423674	-5.68731	1.29e-08	1.04e-07
ENSG00000272620.1	AFAP1-AS1	103.891	-2.40581	0.283871	-8.47501	2.35e-17	3.76e-16
ENSG00000144115.16	THNSL2	70.2659	-2.40529	0.341168	-7.05016	1.79e-12	2.03e-11
ENSG00000229886.1	RP5-1132H15.3	3.91593	-2.40516	1.29771	-1.85339	0.0638261	0.153884
ENSG00000224093.5	RP5-1033H22.2	36.6833	-2.39264	0.428998	-5.57728	2.44e-08	1.91e-07
ENSG00000112297.14	AIM1	306.534	-2.39042	0.163008	-14.6644	1.09e-48	5.86e-47
ENSG00000166922.8	SCG5	41.6496	-2.38856	0.416057	-5.74095	9.41e-09	7.7e-08
ENSG00000225932.3	CTAGE4	6.97258	-2.38688	0.961592	-2.48222	0.0130569	0.0400643
ENSG00000004776.11	HSPB6	19.5538	-2.38555	0.886974	-2.68954	0.00715512	0.023561
ENSG00000005238.19	FAM214B	138.797	-2.38118	0.261574	-9.10327	8.76e-20	1.6e-18
ENSG00000257315.1	ZBED6	898.536	-2.38085	0.115385	-20.634	1.36e-94	1.85e-92
ENSG00000172927.7	MYEOV	121.478	-2.37941	0.238043	-9.9957	1.59e-23	3.52e-22
ENSG00000163017.13	ACTG2	5.88838	-2.37907	1.0661	-2.23155	0.0256447	0.071601
ENSG00000276410.3	HIST1H2BB	84.8032	-2.37779	0.268773	-8.84683	9e-19	1.55e-17
ENSG00000104881.15	PPP1R13L	716.944	-2.37398	0.137263	-17.2951	5.12e-67	4.23e-65
ENSG00000248429.5	RP11-597D13.9	6.8687	-2.36895	0.934411	-2.53523	0.0112372	0.0351793
ENSG00000260466.1	RP4-536B24.2	5.33833	-2.36522	1.24498	-1.8998	0.0574592	0.1411
ENSG00000236559.1	RP11-243J16.7	12.3247	-2.36459	0.780922	-3.02795	0.00246216	0.00904302
ENSG00000237892.1	KLF7-IT1	4.77252	-2.36109	1.06259	-2.22201	0.0262827	0.0731646
ENSG00000112299.7	VNN1	10.6994	-2.36059	0.783978	-3.01104	0.00260357	0.00951151
ENSG00000142178.7	SIK1	516.577	-2.35956	0.145504	-16.2165	3.86e-59	2.68e-57
ENSG00000172340.14	SUCLG2	1043.45	-2.35496	0.107507	-21.9052	2.31e-106	3.88e-104
ENSG00000175745.11	NR2F1	421.664	-2.35068	0.137862	-17.051	3.44e-65	2.76e-63
ENSG00000125538.11	IL1B	195.333	-2.34865	0.511484	-4.59183	4.39e-06	2.59e-05
ENSG00000146648.16	EGFR	6361.06	-2.33616	0.0755682	-30.9145	7.61e-210	3.9e-207
ENSG00000151690.14	MFSD6	445.693	-2.33524	0.139437	-16.7476	5.9e-63	4.54e-61
ENSG00000275379.1	HIST1H3I	180.167	-2.33498	0.197908	-11.7983	3.98e-32	1.26e-30
ENSG00000172037.13	LAMB2	2248.26	-2.32967	0.0926489	-25.1452	1.59e-139	4.01e-137
ENSG00000130508.10	PXDN	2891.61	-2.32003	0.0829207	-27.9789	2.93e-172	1.13e-169
ENSG00000269506.2	RP11-571I18.5	45.7951	-2.3186	0.434585	-5.3352	9.54e-08	6.94e-07
ENSG00000185010.13	F8	36.9943	-2.31074	0.446059	-5.18033	2.21e-07	1.54e-06
ENSG00000233851.1	LATS2-AS1	15.4759	-2.3092	0.912262	-2.53129	0.0113645	0.0355343
ENSG00000253886.1	CTB-158E9.2	10.5717	-2.30812	0.838369	-2.75311	0.00590321	0.0198734
ENSG00000144959.9	NCEH1	744.136	-2.30812	0.131992	-17.4868	1.81e-68	1.53e-66
ENSG00000229915.1	AC016999.2	15.4496	-2.30574	0.814173	-2.832	0.00462575	0.0159702
ENSG00000182197.10	EXT1	2494.98	-2.30566	0.0829701	-27.7891	5.88e-170	2.12e-167
ENSG00000158806.13	NPM2	4.10629	-2.30437	1.41096	-1.63319	0.102428	0.22602
ENSG00000197249.13	SERPINA1	6.59987	-2.30409	1.03258	-2.23139	0.0256553	0.0716236
ENSG00000224763.1	FDPSP8	10.7552	-2.30367	0.755017	-3.05115	0.00227967	0.00842667
ENSG00000189221.9	MAOA	735.276	-2.3015	0.108361	-21.2391	4.16e-100	6.22e-98
ENSG00000168309.16	FAM107A	8.52394	-2.29262	0.924542	-2.47973	0.0131481	0.0402832
ENSG00000197208.5	SLC22A4	110.605	-2.29221	0.241709	-9.48333	2.46e-21	4.91e-20
ENSG00000247844.1	CCAT1	44.0972	-2.28878	0.368907	-6.20422	5.5e-10	5.08e-09
ENSG00000147862.15	NFIB	2253.11	-2.2883	0.0854131	-26.7909	4.12e-158	1.22e-155
ENSG00000115008.5	IL1A	83.3338	-2.28689	0.411174	-5.56187	2.67e-08	2.08e-07
ENSG00000138772.12	ANXA3	685.087	-2.28538	0.14239	-16.0501	5.7e-58	3.83e-56
ENSG00000122641.10	INHBA	53.6582	-2.28344	0.351121	-6.5033	7.86e-11	7.79e-10
ENSG00000162616.8	DNAJB4	646.565	-2.27947	0.115003	-19.821	1.96e-87	2.34e-85
ENSG00000185201.16	IFITM2	926.016	-2.2791	0.12056	-18.9042	1.05e-79	1.14e-77
ENSG00000271009.2	RP11-346C20.3	5.32135	-2.27897	1.02988	-2.21284	0.0269085	0.0746371
ENSG00000168615.11	ADAM9	4054.7	-2.27693	0.0753328	-30.225	1.11e-200	5.21e-198
ENSG00000257432.1	RP11-244H18.4	5.30115	-2.2768	1.20153	-1.89492	0.0581028	0.142378
ENSG00000115884.10	SDC1	774.073	-2.27562	0.111904	-20.3355	6.24e-92	8.25e-90
ENSG00000249302.2	FTH1P24	7.58354	-2.27418	0.937822	-2.42496	0.01531	0.0459758
ENSG00000136068.14	FLNB	11797.5	-2.26845	0.0672045	-33.7545	9.19e-250	7.18e-247
ENSG00000134330.18	IAH1	392.822	-2.26815	0.147608	-15.366	2.77e-53	1.67e-51
ENSG00000150457.8	LATS2	1958.69	-2.26493	0.100844	-22.4597	1.03e-111	1.86e-109
ENSG00000071242.11	RPS6KA2	585.007	-2.26108	0.140574	-16.0847	3.27e-58	2.21e-56
ENSG00000116117.17	PARD3B	638.197	-2.25809	0.13935	-16.2045	4.69e-59	3.25e-57
ENSG00000171522.5	PTGER4	100.195	-2.25183	0.274831	-8.19351	2.54e-16	3.78e-15
ENSG00000184084.7	CTD-2372A4.1	6.64886	-2.24695	1.14387	-1.96435	0.0494901	0.124738
ENSG00000250486.3	FAM218A	25.5815	-2.2448	0.476467	-4.71135	2.46e-06	1.5e-05
ENSG00000026025.14	VIM	9728.02	-2.24426	0.0705449	-31.8132	4.26e-222	2.66e-219
ENSG00000226887.7	ERVMER34-1	83.3055	-2.24318	0.287854	-7.79278	6.56e-15	8.98e-14
ENSG00000129353.14	SLC44A2	2193.87	-2.2419	0.0924211	-24.2574	5.52e-130	1.25e-127
ENSG00000136205.16	TNS3	1120.29	-2.24071	0.100865	-22.2149	2.47e-109	4.31e-107
ENSG00000153317.14	ASAP1	3729.6	-2.23875	0.0744437	-30.0731	1.09e-198	5.02e-196
ENSG00000105976.14	MET	1659.09	-2.23173	0.0876225	-25.4698	4.26e-143	1.11e-140
ENSG00000177311.11	ZBTB38	2059.72	-2.23171	0.0788926	-28.2879	4.87e-176	1.93e-173
ENSG00000118473.21	SGIP1	31.0751	-2.22917	0.65276	-3.415	0.00063783	0.00265717
ENSG00000233929.1	MT1XP1	70.416	-2.22901	0.28438	-7.83814	4.57e-15	6.32e-14
ENSG00000128510.10	CPA4	124.617	-2.22814	0.218242	-10.2095	1.8e-24	4.2e-23
ENSG00000142089.15	IFITM3	877.726	-2.22671	0.130917	-17.0085	7.1e-65	5.66e-63
ENSG00000164741.14	DLC1	1182.17	-2.22196	0.0951592	-23.35	1.38e-120	2.81e-118
ENSG00000223247.1	RNU2-64P	24.1337	-2.22126	0.499667	-4.44548	8.77e-06	4.95e-05
ENSG00000087842.10	PIR	233.134	-2.21962	0.173475	-12.795	1.75e-37	6.68e-36
ENSG00000168874.12	ATOH8	60.6583	-2.21497	0.314445	-7.04406	1.87e-12	2.12e-11
ENSG00000131634.13	TMEM204	30.939	-2.21293	0.442664	-4.99912	5.76e-07	3.8e-06
ENSG00000117143.13	UAP1	3417.93	-2.21135	0.0926934	-23.8566	8.65e-126	1.84e-123
ENSG00000222501.1	RNU4-25P	9.85571	-2.21101	0.897487	-2.46356	0.0137565	0.0418781
ENSG00000244043.1	RPS27P27	4.99362	-2.21022	1.1196	-1.97411	0.0483688	0.122538
ENSG00000272031.2	ANKRD34A	49.8861	-2.20921	0.393124	-5.61963	1.91e-08	1.51e-07
ENSG00000127415.12	IDUA	68.6981	-2.20811	0.426029	-5.183	2.18e-07	1.52e-06
ENSG00000244161.1	FLNB-AS1	93.7362	-2.20546	0.268811	-8.20451	2.32e-16	3.47e-15
ENSG00000186594.13	MIR22HG	153.028	-2.20235	0.218227	-10.092	6e-24	1.36e-22
ENSG00000213977.7	TAX1BP3	215.23	-2.19997	0.180082	-12.2165	2.54e-34	8.7e-33
ENSG00000243147.7	MRPL33	531.928	-2.1995	0.151767	-14.4927	1.35e-47	7.04e-46
ENSG00000277462.1	ZNF670	55.2443	-2.19925	0.355068	-6.19388	5.87e-10	5.41e-09
ENSG00000197381.15	ADARB1	1796.01	-2.19825	0.0947382	-23.2034	4.21e-119	8.4e-117
ENSG00000249628.2	LINC00942	32.4124	-2.19628	0.433528	-5.06607	4.06e-07	2.73e-06
ENSG00000072310.16	SREBF1	1018.5	-2.19321	0.122025	-17.9734	3.15e-72	2.89e-70
ENSG00000144642.21	RBMS3	371.914	-2.19309	0.147913	-14.827	9.81e-50	5.42e-48
ENSG00000163584.17	RPL22L1	595.314	-2.18983	0.121499	-18.0234	1.28e-72	1.19e-70
ENSG00000221869.4	CEBPD	260.034	-2.18817	0.170706	-12.8184	1.29e-37	4.99e-36
ENSG00000156509.13	FBXO43	58.0733	-2.18712	0.325656	-6.71605	1.87e-11	1.95e-10
ENSG00000196954.13	CASP4	423.471	-2.18665	0.149571	-14.6194	2.11e-48	1.13e-46
ENSG00000187800.13	PEAR1	81.237	-2.18443	0.289017	-7.55812	4.09e-14	5.29e-13
ENSG00000236876.3	TMSB4XP1	51.0828	-2.18337	0.402097	-5.42995	5.64e-08	4.22e-07
ENSG00000079459.12	FDFT1	3349.16	-2.18009	0.0969906	-22.4773	6.92e-112	1.26e-109
ENSG00000187134.13	AKR1C1	42.6805	-2.17979	0.398153	-5.47475	4.38e-08	3.32e-07
ENSG00000138119.16	MYOF	5606.97	-2.17862	0.0791806	-27.5145	1.18e-166	3.9e-164
ENSG00000242670.1	RP11-601I15.1	13.3731	-2.17844	0.690896	-3.15307	0.00161563	0.00616984
ENSG00000232734.1	ATP5G1P7	3.84721	-2.17712	1.22272	-1.78055	0.0749857	0.175775
ENSG00000072110.13	ACTN1	4475.45	-2.17696	0.0779444	-27.9296	1.17e-171	4.32e-169
ENSG00000261143.1	ADAMTS7P3	14.9196	-2.16955	0.696699	-3.11405	0.00184541	0.00696846
ENSG00000215795.2	RP11-488L18.3	6.88148	-2.16793	0.940421	-2.30527	0.0211513	0.0606562
ENSG00000136167.13	LCP1	30.8207	-2.16685	0.468586	-4.62423	3.76e-06	2.24e-05
ENSG00000148926.9	ADM	477.125	-2.16605	0.130653	-16.5787	9.94e-62	7.26e-60
ENSG00000272405.1	RP11-284F21.10	74.241	-2.16568	0.299556	-7.22965	4.84e-13	5.79e-12
ENSG00000183691.4	NOG	82.4711	-2.16553	0.273185	-7.92698	2.25e-15	3.16e-14
ENSG00000106617.13	PRKAG2	624.114	-2.16254	0.119554	-18.0884	3.93e-73	3.72e-71
ENSG00000100300.17	TSPO	870.593	-2.15919	0.12825	-16.8357	1.34e-63	1.05e-61
ENSG00000145431.10	PDGFC	619.721	-2.15374	0.123894	-17.3836	1.1e-67	9.14e-66
ENSG00000227212.3	PFN1P6	16.1939	-2.15294	0.755861	-2.84833	0.00439491	0.015265
ENSG00000145428.14	RNF175	4.07499	-2.15222	1.83108	-1.17538	0.239841	0.427277
ENSG00000130303.12	BST2	494.359	-2.15205	0.14937	-14.4075	4.64e-47	2.39e-45
ENSG00000159176.13	CSRP1	2626.49	-2.15176	0.0884748	-24.3206	1.19e-130	2.74e-128
ENSG00000183929.7	DUSP5P1	11.5516	-2.15125	0.737585	-2.91661	0.00353862	0.01254
ENSG00000138028.14	CGREF1	139.206	-2.14703	0.245457	-8.74709	2.19e-18	3.71e-17
ENSG00000185697.16	MYBL1	603.481	-2.14388	0.128097	-16.7364	7.11e-63	5.45e-61
ENSG00000023445.13	BIRC3	265.609	-2.14325	0.166415	-12.879	5.91e-38	2.31e-36
ENSG00000233877.2	RP11-182I10.2	5.55656	-2.14311	1.17183	-1.82885	0.0674222	0.161138
ENSG00000257335.8	MGAM	9.85775	-2.14258	1.0769	-1.98959	0.0466359	0.118875
ENSG00000186354.10	C9orf47	37.1369	-2.14204	0.468576	-4.57139	4.84e-06	2.84e-05
ENSG00000119403.13	PHF19	572.776	-2.14108	0.122317	-17.5043	1.33e-68	1.14e-66
ENSG00000183615.5	FAM167B	6.13445	-2.13864	1.34207	-1.59353	0.11104	0.24098
ENSG00000136830.11	FAM129B	2432.85	-2.13784	0.0982662	-21.7556	6.11e-105	1e-102
ENSG00000231870.4	KRT17P3	20.0454	-2.13668	1.65017	-1.29482	0.195382	0.369279
ENSG00000105767.2	CADM4	430.279	-2.13463	0.150652	-14.1692	1.42e-45	6.98e-44
ENSG00000198739.10	LRRTM3	3.69219	-2.13376	1.84702	-1.15525	0.247988	0.437368
ENSG00000119922.9	IFIT2	29.8806	-2.13337	0.522899	-4.07989	4.51e-05	0.000229119
ENSG00000200792.1	SNORA80A	26.9764	-2.13028	0.465315	-4.57814	4.69e-06	2.75e-05
ENSG00000229465.1	ACTG1P11	27.327	-2.12966	0.48863	-4.35842	1.31e-05	7.21e-05
ENSG00000030304.13	MUSK	6.70506	-2.12952	1.00227	-2.1247	0.0336115	0.0903487
ENSG00000206913.1	SNORA7	3.70436	-2.12936	1.24561	-1.70949	0.0873592	0.198884
ENSG00000135048.13	TMEM2	1586.19	-2.12901	0.0867362	-24.5459	4.79e-133	1.15e-130
ENSG00000140280.13	LYSMD2	70.4191	-2.12678	0.316963	-6.70988	1.95e-11	2.03e-10
ENSG00000279141.3	LINC01451	7.30049	-2.1232	1.73281	-1.2253	0.220464	0.402967
ENSG00000198431.15	TXNRD1	10140.3	-2.12239	0.0736127	-28.8319	8.55e-183	3.59e-180
ENSG00000177699.4	RP11-16K12.1	24.0706	-2.12208	0.558693	-3.79829	0.000145695	0.000678472
ENSG00000111319.12	SCNN1A	196.64	-2.12111	0.177912	-11.9223	9.06e-33	2.94e-31
ENSG00000158711.13	ELK4	2766.79	-2.11936	0.090766	-23.3497	1.39e-120	2.81e-118
ENSG00000240156.1	COX6CP6	4.87525	-2.11921	1.2211	-1.73549	0.0826545	0.190188
ENSG00000174939.10	ASPHD1	66.0546	-2.11448	0.352146	-6.00455	1.92e-09	1.68e-08
ENSG00000115339.13	GALNT3	317.661	-2.1127	0.182317	-11.5881	4.74e-31	1.44e-29
ENSG00000235525.1	FTLP1	3.23843	-2.11231	1.89425	-1.11511	0.264802	0.458882
ENSG00000251188.1	RP11-478C6.6	5.27751	-2.11072	1.05514	-2.00042	0.045455	0.116424
ENSG00000255737.2	AGAP2-AS1	73.307	-2.11055	0.321098	-6.5729	4.93e-11	4.98e-10
ENSG00000120899.17	PTK2B	245.374	-2.10848	0.196925	-10.7071	9.43e-27	2.37e-25
ENSG00000184227.7	ACOT1	46.825	-2.10835	0.36494	-5.77725	7.59e-09	6.26e-08
ENSG00000114019.14	AMOTL2	4361.58	-2.10791	0.0784381	-26.8736	4.47e-159	1.34e-156
ENSG00000223505.2	RP11-397P13.7	11.7025	-2.10466	0.794294	-2.64972	0.00805579	0.0262109
ENSG00000147813.15	NAPRT	232.229	-2.10272	0.188449	-11.158	6.54e-29	1.81e-27
ENSG00000005379.15	TSPOAP1	39.4729	-2.09766	0.485028	-4.32483	1.53e-05	8.34e-05
ENSG00000143369.14	ECM1	222.174	-2.09551	0.231025	-9.0705	1.18e-19	2.15e-18
ENSG00000167779.7	IGFBP6	102.788	-2.09533	0.251054	-8.34615	7.05e-17	1.09e-15
ENSG00000105738.10	SIPA1L3	1757.16	-2.09138	0.115201	-18.1541	1.19e-73	1.15e-71
ENSG00000230902.1	FAM204CP	10.5869	-2.08958	0.810595	-2.57783	0.00994227	0.0315709
ENSG00000213275.2	IFITM9P	17.7974	-2.08899	0.657948	-3.17501	0.0014983	0.00576399
ENSG00000282021.1	CTD-2336O2.3	10.241	-2.08889	0.764786	-2.73134	0.00630777	0.0210666
ENSG00000267648.1	RP11-686D22.3	5.22541	-2.08712	0.991294	-2.10546	0.0352517	0.0939501
ENSG00000237515.7	SHISA9	913.366	-2.08533	0.103086	-20.229	5.44e-91	7.12e-89
ENSG00000151632.17	AKR1C2	27.4537	-2.08448	0.518911	-4.01703	5.89e-05	0.000294534
ENSG00000224078.12	SNHG14	440.353	-2.08061	0.141182	-14.7371	3.72e-49	2.01e-47
ENSG00000100196.10	KDELR3	755.317	-2.07927	0.130656	-15.914	5.06e-57	3.33e-55
ENSG00000046647.13	GEMIN8	69.1244	-2.07816	0.335633	-6.19177	5.95e-10	5.47e-09
ENSG00000131773.13	KHDRBS3	61.6284	-2.07792	0.3529	-5.88811	3.91e-09	3.32e-08
ENSG00000225206.7	MIR137HG	29.676	-2.07342	0.488232	-4.2468	2.17e-05	0.000115571
ENSG00000057657.15	PRDM1	49.1747	-2.07076	0.35234	-5.87717	4.17e-09	3.53e-08
ENSG00000069869.15	NEDD4	2476.49	-2.06704	0.0781562	-26.4475	3.9e-154	1.11e-151
ENSG00000171914.15	TLN2	487.677	-2.06353	0.14723	-14.0157	1.25e-44	5.94e-43
ENSG00000179715.12	PCED1B	28.1681	-2.06341	0.507779	-4.0636	4.83e-05	0.000244744
ENSG00000178209.14	PLEC	16527.5	-2.06258	0.0890684	-23.1572	1.23e-118	2.44e-116
ENSG00000126522.16	ASL	167.078	-2.06041	0.218887	-9.41309	4.82e-21	9.44e-20
ENSG00000261105.5	LMO7-AS1	14.5108	-2.05974	0.719035	-2.8646	0.00417543	0.0145964
ENSG00000134531.9	EMP1	990.189	-2.05251	0.0979866	-20.9469	2e-97	2.86e-95
ENSG00000243004.5	AC005062.2	5.455	-2.05198	1.14802	-1.78741	0.0738716	0.173771
ENSG00000163453.11	IGFBP7	467.061	-2.05037	0.147271	-13.9224	4.63e-44	2.16e-42
ENSG00000142675.17	CNKSR1	60.3958	-2.04805	0.336162	-6.09246	1.11e-09	9.96e-09
ENSG00000250614.1	AC007078.4	5.31187	-2.04274	1.20374	-1.69699	0.0896978	0.203449
ENSG00000171163.15	ZNF692	332.677	-2.03793	0.157552	-12.935	2.86e-38	1.13e-36
ENSG00000260832.1	CTD-3253I12.1	6.81478	-2.03667	1.04785	-1.94366	0.0519359	0.129948
ENSG00000221878.11	PSG7	28.4691	-2.03368	0.696476	-2.91995	0.0035009	0.0124173
ENSG00000270382.1	RP1-152L7.9	5.31662	-2.03284	1.04841	-1.93897	0.0525051	0.131104
ENSG00000197472.14	ZNF695	152.608	-2.03099	0.200547	-10.1273	4.18e-24	9.58e-23
ENSG00000103187.7	COTL1	2511.38	-2.03022	0.0952465	-21.3154	8.17e-101	1.23e-98
ENSG00000197358.9	BNIP3P1	121.296	-2.03017	0.246451	-8.23762	1.76e-16	2.66e-15
ENSG00000142910.15	TINAGL1	439.235	-2.0294	0.147263	-13.7807	3.33e-43	1.54e-41
ENSG00000105971.14	CAV2	691.116	-2.02767	0.115222	-17.5979	2.55e-69	2.22e-67
ENSG00000179111.8	HES7	76.3917	-2.02572	0.323839	-6.25534	3.97e-10	3.71e-09
ENSG00000050405.13	LIMA1	4330.63	-2.02355	0.0795028	-25.4526	6.61e-143	1.71e-140
ENSG00000106804.7	C5	65.7833	-2.02329	0.312025	-6.48438	8.91e-11	8.8e-10
ENSG00000197712.11	FAM114A1	1085.6	-2.02206	0.106507	-18.9853	2.26e-80	2.46e-78
ENSG00000153714.5	LURAP1L	106.255	-2.02198	0.499012	-4.05197	5.08e-05	0.000256501
ENSG00000158246.7	FAM46B	239.463	-2.02039	0.170769	-11.8311	2.7e-32	8.58e-31
ENSG00000184497.12	TMEM255B	24.8095	-2.02032	0.484407	-4.17072	3.04e-05	0.000158559
ENSG00000228974.5	AC006483.5	9.16528	-2.01942	0.814758	-2.47855	0.0131918	0.0403951
ENSG00000130813.17	C19orf66	116.933	-2.01624	0.270927	-7.442	9.92e-14	1.25e-12
ENSG00000240940.3	RN7SL591P	6.05672	-2.01505	1.17194	-1.71942	0.0855386	0.19556
ENSG00000071967.11	CYBRD1	997.617	-2.01156	0.13757	-14.6221	2.03e-48	1.09e-46
ENSG00000148848.14	ADAM12	70.4815	-2.0106	0.293947	-6.84001	7.92e-12	8.54e-11
ENSG00000229280.1	EEF1DP6	9.60233	-2.0083	0.771443	-2.60331	0.00923291	0.0295927
ENSG00000137628.16	DDX60	163.901	-2.00714	0.217382	-9.23321	2.63e-20	4.92e-19
ENSG00000261757.1	AC005592.3	5.14903	-2.00634	1.2015	-1.66987	0.0949448	0.212862
ENSG00000184900.15	SUMO3	812.466	-2.00567	0.106522	-18.8288	4.39e-79	4.66e-77
ENSG00000236349.1	SUCLG2P2	84.3147	-2.00547	0.298654	-6.71501	1.88e-11	1.96e-10
ENSG00000276850.4	CH17-360D5.2	33.2383	-2.00538	0.409141	-4.90144	9.51e-07	6.13e-06
ENSG00000183963.18	SMTN	1105.97	-2.00142	0.108177	-18.5013	2.01e-76	2.05e-74
ENSG00000225745.8	AL773572.7	13.2457	-2.00114	0.776847	-2.57598	0.00999573	0.0317125
ENSG00000250320.5	CTD-2269F5.1	8.58953	-2.00101	0.797598	-2.5088	0.0121143	0.0375492
ENSG00000112186.11	CAP2	361.58	-1.99769	0.149374	-13.3738	8.61e-41	3.73e-39
ENSG00000278513.1	RP11-123C21.3	7.29522	-1.99624	1.14749	-1.73965	0.0819198	0.188727
ENSG00000227765.4	MYL12BP2	23.9625	-1.99573	0.537653	-3.71192	0.000205692	0.000934364
ENSG00000174564.12	IL20RB	69.7165	-1.99416	0.320978	-6.21278	5.21e-10	4.82e-09
ENSG00000052802.12	MSMO1	1716.31	-1.99363	0.106629	-18.6968	5.26e-78	5.46e-76
ENSG00000276810.1	RP11-19G24.2	5.49116	-1.99008	1.13063	-1.76015	0.0783815	0.181916
ENSG00000198331.10	HYLS1	128.706	-1.98915	0.213665	-9.30967	1.28e-20	2.44e-19
ENSG00000162852.13	CNST	476.769	-1.98345	0.146512	-13.5378	9.35e-42	4.18e-40
ENSG00000075391.16	RASAL2	1490.42	-1.98322	0.0944494	-20.9977	6.88e-98	9.99e-96
ENSG00000277367.1	RP11-536C10.26	7.64882	-1.97869	0.951284	-2.08002	0.0375233	0.0992429
ENSG00000186063.12	AIDA	2081.09	-1.97868	0.0823919	-24.0155	1.91e-127	4.18e-125
ENSG00000163995.19	ABLIM2	45.6674	-1.9778	0.406193	-4.86911	1.12e-06	7.16e-06
ENSG00000197375.12	SLC22A5	1380.08	-1.97701	0.0911625	-21.6866	2.74e-104	4.44e-102
ENSG00000237939.1	AC097523.3	7.93222	-1.97659	0.969985	-2.03775	0.0415747	0.108049
ENSG00000103642.11	LACTB	450.702	-1.97593	0.138031	-14.3151	1.76e-46	8.88e-45
ENSG00000274718.1	RP11-346C4.3	5.93737	-1.97348	0.969447	-2.03568	0.0417825	0.108467
ENSG00000232821.1	AC003986.6	14.5354	-1.97296	0.629249	-3.13543	0.00171604	0.00651965
ENSG00000149380.11	P4HA3	61.5151	-1.97294	0.319659	-6.17203	6.74e-10	6.16e-09
ENSG00000120088.14	CRHR1	3.38083	-1.97191	1.50077	-1.31393	0.188869	0.360533
ENSG00000172965.14	MIR4435-2HG	452.382	-1.97105	0.132266	-14.9022	3.19e-50	1.81e-48
ENSG00000205542.10	TMSB4X	2395.99	-1.97024	0.106949	-18.4223	8.71e-76	8.78e-74
ENSG00000265096.1	C1QTNF1-AS1	3.54377	-1.96999	1.26158	-1.56153	0.118399	0.253259
ENSG00000213667.3	PGGT1BP1	5.56302	-1.96904	1.07687	-1.82848	0.0674771	0.161249
ENSG00000047644.18	WWC3	756.153	-1.96818	0.115421	-17.0521	3.37e-65	2.71e-63
ENSG00000175793.11	SFN	300.949	-1.96647	0.151265	-13.0002	1.22e-38	4.91e-37
ENSG00000176871.8	WSB2	1391.27	-1.96607	0.0927287	-21.2024	9.07e-100	1.35e-97
ENSG00000067064.10	IDI1	1018.47	-1.96604	0.113792	-17.2775	6.95e-67	5.72e-65
ENSG00000274658.1	TBC1D3J	5.14712	-1.96442	1.37837	-1.42517	0.154107	0.310551
ENSG00000111846.15	GCNT2	415.632	-1.96139	0.139635	-14.0465	8.09e-45	3.87e-43
ENSG00000169604.19	ANTXR1	1337.83	-1.96029	0.0941358	-20.8241	2.62e-96	3.69e-94
ENSG00000264596.1	RP11-678G15.1	19.6582	-1.95933	0.6274	-3.12293	0.0017906	0.00677876
ENSG00000273143.1	RP11-525A16.4	5.90836	-1.95626	1.05535	-1.85366	0.0637883	0.153819
ENSG00000269906.1	RP11-248J18.2	59.2186	-1.95303	0.352591	-5.53909	3.04e-08	2.35e-07
ENSG00000008517.16	IL32	535.173	-1.95264	0.137877	-14.1622	1.57e-45	7.7e-44
ENSG00000184384.13	MAML2	390.417	-1.95254	0.139876	-13.9591	2.77e-44	1.31e-42
ENSG00000158714.10	SLAMF8	3.93363	-1.95172	1.45363	-1.34265	0.179385	0.346832
ENSG00000243415.2	RP11-274H2.2	21.8346	-1.9509	0.522478	-3.73394	0.000188505	0.000860876
ENSG00000178498.15	DTX3	90.3851	-1.95066	0.3155	-6.18276	6.3e-10	5.77e-09
ENSG00000078081.7	LAMP3	208.322	-1.94966	0.219748	-8.87227	7.17e-19	1.24e-17
ENSG00000274849.1	RP11-49I11.4	15.0925	-1.9492	0.732206	-2.66209	0.00776578	0.0253523
ENSG00000133065.10	SLC41A1	1695.78	-1.94302	0.0891717	-21.7896	2.91e-105	4.79e-103
ENSG00000279629.1	RP11-426J5.1	3.80108	-1.94293	1.49038	-1.30365	0.192354	0.365128
ENSG00000230583.6	GTF2IRD1P1	9.90559	-1.94107	0.980543	-1.97959	0.04775	0.121271
ENSG00000237101.1	RP11-365O16.6	4.54854	-1.94087	1.40681	-1.37962	0.167705	0.330072
ENSG00000259030.6	FPGT-TNNI3K	6.16091	-1.94064	1.29323	-1.50062	0.133454	0.278477
ENSG00000275342.4	SGK223	348.081	-1.93521	0.153359	-12.6188	1.66e-36	6.15e-35
ENSG00000140853.15	NLRC5	122.301	-1.93388	0.251702	-7.68324	1.55e-14	2.07e-13
ENSG00000206560.11	ANKRD28	1310.37	-1.92358	0.0956267	-20.1155	5.4e-90	6.97e-88
ENSG00000233532.5	LINC00460	24.0097	-1.92178	0.480285	-4.00133	6.3e-05	0.00031272
ENSG00000230300.1	STARD13-IT1	4.89048	-1.91884	1.07531	-1.78445	0.0743504	0.174591
ENSG00000155850.7	SLC26A2	1502.45	-1.91876	0.0915211	-20.9653	1.36e-97	1.96e-95
ENSG00000234219.1	CDCA4P4	21.1867	-1.91824	0.618413	-3.10187	0.00192303	0.00723765
ENSG00000271204.1	RP11-138A9.1	189.213	-1.91798	0.385219	-4.97892	6.39e-07	4.2e-06
ENSG00000163513.17	TGFBR2	973.284	-1.91476	0.101591	-18.8477	3.07e-79	3.27e-77
ENSG00000233952.1	FTLP15	19.8161	-1.91446	0.68262	-2.80457	0.00503832	0.0172339
ENSG00000163814.7	CDCP1	203.607	-1.91396	0.191137	-10.0135	1.33e-23	2.95e-22
ENSG00000137460.8	FHDC1	103.903	-1.91348	0.242613	-7.88696	3.1e-15	4.33e-14
ENSG00000198892.6	SHISA4	96.7035	-1.91294	0.310009	-6.17061	6.8e-10	6.21e-09
ENSG00000163191.5	S100A11	1349.49	-1.9104	0.0987346	-19.3489	2.08e-83	2.35e-81
ENSG00000182809.10	CRIP2	131.128	-1.90881	0.225272	-8.47336	2.38e-17	3.81e-16
ENSG00000267592.1	CTC-507E2.2	8.4226	-1.90618	1.14608	-1.66322	0.0962676	0.215176
ENSG00000113356.11	POLR3G	490.648	-1.90554	0.13125	-14.5184	9.26e-48	4.85e-46
ENSG00000184792.15	OSBP2	425.189	-1.9034	0.145776	-13.0571	5.79e-39	2.35e-37
ENSG00000158023.9	WDR66	561.892	-1.90325	0.121416	-15.6755	2.23e-55	1.4e-53
ENSG00000223653.5	RP11-131L23.1	34.3656	-1.90265	0.422906	-4.499	6.83e-06	3.91e-05
ENSG00000154620.5	TMSB4Y	19.7795	-1.90232	0.640486	-2.97012	0.00297686	0.0107427
ENSG00000196581.10	AJAP1	6.78656	-1.89908	1.16822	-1.62561	0.104032	0.228932
ENSG00000234327.7	AC012146.7	53.599	-1.899	0.327055	-5.80637	6.38e-09	5.3e-08
ENSG00000217555.12	CKLF	48.038	-1.89632	0.353421	-5.36561	8.07e-08	5.92e-07
ENSG00000260035.1	CTD-2651B20.6	19.385	-1.89526	0.584274	-3.24378	0.00117953	0.00464427
ENSG00000112851.14	ERBIN	5196.77	-1.89341	0.069158	-27.3779	5.02e-165	1.64e-162
ENSG00000159860.6	TCAF2P1	7.98583	-1.89296	0.801197	-2.36266	0.0181441	0.0531535
ENSG00000077942.18	FBLN1	3396.32	-1.89191	0.0824126	-22.9566	1.27e-116	2.46e-114
ENSG00000148484.17	RSU1	416.729	-1.88877	0.132743	-14.2288	6.07e-46	3.01e-44
ENSG00000196110.7	ZNF699	219.697	-1.88138	0.18272	-10.2965	7.3e-25	1.72e-23
ENSG00000232536.1	RP11-74C1.4	20.5133	-1.88111	0.671207	-2.80258	0.00506951	0.0173364
ENSG00000226028.2	PFN1P12	4.84645	-1.88094	1.23318	-1.52528	0.12719	0.267848
ENSG00000173706.12	HEG1	1785.51	-1.8796	0.0935648	-20.0888	9.26e-90	1.18e-87
ENSG00000120913.23	PDLIM2	641.304	-1.87921	0.134147	-14.0086	1.38e-44	6.56e-43
ENSG00000092964.17	DPYSL2	1459.52	-1.87839	0.0930828	-20.1797	1.48e-90	1.92e-88
ENSG00000221963.5	APOL6	360.562	-1.87454	0.154203	-12.1563	5.31e-34	1.8e-32
ENSG00000240163.1	RP11-745A24.1	15.6091	-1.87438	0.609868	-3.07341	0.00211624	0.00788471
ENSG00000250945.1	RP11-810P8.1	3.63018	-1.8731	1.31746	-1.42174	0.155101	0.312053
ENSG00000125531.6	FNDC11	6.92887	-1.87206	1.15347	-1.62298	0.104594	0.229845
ENSG00000139508.14	SLC46A3	108.137	-1.87048	0.24936	-7.50111	6.33e-14	8.09e-13
ENSG00000147526.19	TACC1	2130.32	-1.86999	0.0809022	-23.1142	3.33e-118	6.56e-116
ENSG00000223551.1	TMSB4XP4	197.378	-1.86863	0.219898	-8.49771	1.93e-17	3.11e-16
ENSG00000139629.15	GALNT6	524.389	-1.86808	0.132921	-14.054	7.28e-45	3.49e-43
ENSG00000087086.14	FTL	15701.5	-1.86563	0.0715369	-26.0793	6.26e-150	1.71e-147
ENSG00000151414.14	NEK7	2339.94	-1.86448	0.086421	-21.5744	3.12e-103	4.94e-101
ENSG00000219201.4	RP11-181C21.4	174.679	-1.86322	0.19736	-9.4407	3.7e-21	7.32e-20
ENSG00000270190.1	RP11-803D5.4	6.49047	-1.86243	0.907011	-2.05337	0.0400371	0.104623
ENSG00000217824.1	SNRPEP6	4.95503	-1.86119	1.03508	-1.79811	0.0721599	0.170471
ENSG00000266780.1	MIR4444-2	8.15433	-1.86018	0.785817	-2.36719	0.0179238	0.0526398
ENSG00000180801.13	ARSJ	363.866	-1.85639	0.13819	-13.4336	3.84e-41	1.69e-39
ENSG00000111145.7	ELK3	839.988	-1.85617	0.120159	-15.4477	7.82e-54	4.79e-52
ENSG00000271525.1	ARF4P1	25.2744	-1.85478	0.52444	-3.53669	0.000405168	0.0017434
ENSG00000041880.14	PARP3	87.2518	-1.85155	0.278565	-6.64674	3e-11	3.08e-10
ENSG00000112414.14	ADGRG6	2543.78	-1.8511	0.0860753	-21.5055	1.38e-102	2.17e-100
ENSG00000239398.3	RN7SL342P	16.6785	-1.85041	0.615521	-3.00625	0.00264492	0.00964379
ENSG00000234449.2	RP11-706O15.3	165.261	-1.8493	0.205066	-9.01809	1.91e-19	3.43e-18
ENSG00000171408.13	PDE7B	51.2467	-1.84869	0.340811	-5.42437	5.82e-08	4.34e-07
ENSG00000150456.10	EEF1AKMT1	72.0321	-1.84764	0.272748	-6.77415	1.25e-11	1.32e-10
ENSG00000202536.2	Y_RNA	5.26264	-1.84394	0.996213	-1.85095	0.0641763	0.154586
ENSG00000240925.1	RPS20P31	7.33022	-1.84373	1.03389	-1.7833	0.0745376	0.174909
ENSG00000276170.4	AC124789.1	35.9408	-1.84361	0.403488	-4.56918	4.9e-06	2.86e-05
ENSG00000214063.10	TSPAN4	539.778	-1.84182	0.12897	-14.281	2.88e-46	1.44e-44
ENSG00000135925.8	WNT10A	5.80591	-1.8411	1.15886	-1.58872	0.112124	0.242827
ENSG00000170011.13	MYRIP	15.2081	-1.84105	0.691785	-2.6613	0.00778395	0.0253998
ENSG00000279314.1	RP1-257C22.2	14.2388	-1.84065	0.735235	-2.50348	0.0122977	0.0380296
ENSG00000196923.13	PDLIM7	683.47	-1.83916	0.111745	-16.4584	7.3e-61	5.28e-59
ENSG00000262663.1	RP11-497H17.1	17.5618	-1.83803	0.622266	-2.95376	0.00313929	0.011263
ENSG00000258011.2	HMGA1P3	44.1515	-1.83504	0.362285	-5.06519	4.08e-07	2.74e-06
ENSG00000015171.18	ZMYND11	618.516	-1.83432	0.117511	-15.6098	6.25e-55	3.9e-53
ENSG00000209042.1	SNORD12C	7.68636	-1.83163	0.822483	-2.22695	0.0259505	0.0723687
ENSG00000225462.1	FDPSP1	21.4602	-1.82691	0.50708	-3.60281	0.000314792	0.00138156
ENSG00000243566.6	UPK3B	10.2079	-1.82611	0.927749	-1.96833	0.0490304	0.12379
ENSG00000186777.11	ZNF732	38.5513	-1.82156	0.38315	-4.75417	1.99e-06	1.23e-05
ENSG00000185013.16	NT5C1B	6.21027	-1.81938	0.901494	-2.01818	0.0435719	0.112203
ENSG00000182158.14	CREB3L2	2510.16	-1.81814	0.100241	-18.1377	1.61e-73	1.55e-71
ENSG00000248394.1	FOSL1P1	27.7835	-1.81788	0.458664	-3.96343	7.39e-05	0.000361698
ENSG00000234616.8	JRK	1051.37	-1.81733	0.101529	-17.8996	1.19e-71	1.08e-69
ENSG00000226149.5	RP1-69D17.4	5.42238	-1.81595	1.124	-1.61561	0.106179	0.232465
ENSG00000278896.1	RP11-474P2.7	20.1241	-1.81405	0.568048	-3.19347	0.00140573	0.00544134
ENSG00000203668.2	CHML	1377.01	-1.8129	0.0848776	-21.359	3.22e-101	4.89e-99
ENSG00000132613.14	MTSS1L	824.996	-1.81275	0.117382	-15.4431	8.39e-54	5.1e-52
ENSG00000236449.1	AC018890.6	6.79325	-1.8122	1.01085	-1.79274	0.0730145	0.172071
ENSG00000236562.4	RP11-396M11.1	44.7309	-1.81075	0.385732	-4.69431	2.68e-06	1.62e-05
ENSG00000266899.2	AKR1B1P7	16.743	-1.81067	0.631212	-2.86856	0.00412341	0.0144253
ENSG00000162782.15	TDRD5	16.3586	-1.80876	0.823675	-2.19596	0.0280946	0.0774576
ENSG00000072682.18	P4HA2	820.429	-1.80774	0.110506	-16.3588	3.76e-60	2.66e-58
ENSG00000232368.1	FTLP2	191.863	-1.80745	0.222663	-8.11744	4.76e-16	7.01e-15
ENSG00000222365.1	SNORD12B	8.49281	-1.8053	0.836921	-2.15708	0.0309998	0.0843435
ENSG00000169857.7	AVEN	161.422	-1.80449	0.19343	-9.32891	1.07e-20	2.05e-19
ENSG00000214027.3	ARPC3P5	14.2053	-1.80346	0.67389	-2.67619	0.00744645	0.024426
ENSG00000116016.13	EPAS1	3533.4	-1.80045	0.105544	-17.0588	3.01e-65	2.43e-63
ENSG00000160789.19	LMNA	3686.5	-1.80044	0.089866	-20.0347	2.74e-89	3.48e-87
ENSG00000198121.13	LPAR1	751.16	-1.80015	0.107581	-16.7329	7.55e-63	5.77e-61
ENSG00000143537.13	ADAM15	1824.74	-1.79857	0.0920219	-19.545	4.55e-85	5.31e-83
ENSG00000232035.1	RP11-87N24.3	11.1294	-1.79828	0.783282	-2.29582	0.0216859	0.0620313
ENSG00000225684.3	FAM225B	33.8235	-1.79775	0.407047	-4.41656	1e-05	5.6e-05
ENSG00000261553.5	RP11-29G8.3	64.7178	-1.79719	0.31032	-5.7914	6.98e-09	5.77e-08
ENSG00000267250.1	RP11-118B18.2	7.78278	-1.79547	0.843979	-2.12739	0.0333874	0.0898322
ENSG00000276368.1	HIST1H2AJ	256.246	-1.79447	0.16655	-10.7744	4.55e-27	1.16e-25
ENSG00000198853.11	RUSC2	752.641	-1.79444	0.113892	-15.7556	6.28e-56	4.01e-54
ENSG00000232797.1	FAM207CP	6.3425	-1.79397	0.964664	-1.85969	0.0629301	0.15214
ENSG00000271639.1	RP11-289A15.1	10.0416	-1.7939	0.83101	-2.1587	0.0308737	0.0840738
ENSG00000173482.16	PTPRM	1082.08	-1.7935	0.104111	-17.2269	1.67e-66	1.37e-64
ENSG00000214309.4	MBLAC1	27.1562	-1.79325	0.453236	-3.95655	7.6e-05	0.000371434
ENSG00000176692.5	FOXC2	149.374	-1.79283	0.188448	-9.51366	1.84e-21	3.69e-20
ENSG00000269653.1	CTB-102L5.7	17.676	-1.79228	0.61041	-2.93618	0.00332279	0.0118543
ENSG00000234424.2	RP11-213G2.1	6.81017	-1.79217	1.00598	-1.78151	0.0748288	0.175465
ENSG00000103257.8	SLC7A5	12093.8	-1.78857	0.0731315	-24.4569	4.25e-132	9.98e-130
ENSG00000124587.13	PEX6	418.072	-1.78849	0.147613	-12.1161	8.68e-34	2.92e-32
ENSG00000177707.10	NECTIN3	811.555	-1.78824	0.102522	-17.4424	3.93e-68	3.29e-66
ENSG00000274598.1	RP11-423G4.10	13.9675	-1.78721	0.728916	-2.45187	0.0142117	0.0431146
ENSG00000215035.2	FDPSP5	15.1451	-1.78338	0.611615	-2.91586	0.0035471	0.0125637
ENSG00000140859.15	KIFC3	1206.96	-1.78307	0.0988567	-18.0369	1e-72	9.35e-71
ENSG00000230450.1	NEK2P4	8.97484	-1.78276	0.881085	-2.02336	0.0430357	0.111064
ENSG00000189362.11	NEMP2	269.108	-1.78131	0.159567	-11.1634	6.16e-29	1.7e-27
ENSG00000261278.1	RP11-430C1.2	5.35255	-1.7735	0.969107	-1.83003	0.0672453	0.160778
ENSG00000134775.15	FHOD3	110.956	-1.77323	0.236564	-7.49575	6.59e-14	8.41e-13
ENSG00000213033.4	AURKAPS1	8.21474	-1.77048	0.866281	-2.04377	0.0409763	0.10673
ENSG00000160752.14	FDPS	1335.27	-1.76885	0.10021	-17.6515	9.91e-70	8.72e-68
ENSG00000213149.3	CNN2P9	9.27554	-1.76693	0.780738	-2.26316	0.0236258	0.0667122
ENSG00000235734.4	HMGN1P36	10.2437	-1.76594	0.777276	-2.27196	0.0230888	0.0653599
ENSG00000104522.15	TSTA3	763.341	-1.76453	0.107556	-16.4057	1.74e-60	1.25e-58
ENSG00000243056.1	EIF4EBP3	8.64342	-1.76286	0.929654	-1.89625	0.0579267	0.142021
ENSG00000228523.1	RP11-131O15.2	23.5128	-1.76197	0.483385	-3.64506	0.000267327	0.00119032
ENSG00000129354.11	AP1M2	118.695	-1.76109	0.228158	-7.7187	1.18e-14	1.58e-13
ENSG00000226608.3	FTLP3	708.057	-1.76096	0.133147	-13.2257	6.23e-40	2.63e-38
ENSG00000237852.1	RP4-630A11.3	3.46936	-1.76009	1.55098	-1.13483	0.256448	0.447909
ENSG00000075643.5	MOCOS	873.017	-1.76005	0.120734	-14.5779	3.88e-48	2.06e-46
ENSG00000150471.16	ADGRL3	127.418	-1.75887	0.229995	-7.64744	2.05e-14	2.72e-13
ENSG00000172936.12	MYD88	127.331	-1.75881	0.23054	-7.62911	2.36e-14	3.12e-13
ENSG00000223722.3	RP11-467L13.5	22.4475	-1.75614	0.507767	-3.45856	0.000543073	0.00228919
ENSG00000163701.18	IL17RE	67.3949	-1.75488	0.306251	-5.73021	1e-08	8.17e-08
ENSG00000273319.1	RP11-138A9.2	348.957	-1.75474	0.195754	-8.964	3.13e-19	5.55e-18
ENSG00000280721.1	AC133644.2	50.2899	-1.75459	0.338836	-5.17831	2.24e-07	1.55e-06
ENSG00000225778.5	PROSER2-AS1	50.0053	-1.75361	0.346648	-5.05876	4.22e-07	2.83e-06
ENSG00000123609.10	NMI	84.6257	-1.75336	0.270941	-6.47137	9.71e-11	9.56e-10
ENSG00000178605.13	GTPBP6	196.077	-1.75293	0.189969	-9.22743	2.77e-20	5.19e-19
ENSG00000259663.2	CTD-2314G24.2	13.4074	-1.74737	0.636507	-2.74525	0.00604646	0.0203023
ENSG00000267190.1	AC002314.4	6.30556	-1.74648	0.915904	-1.90684	0.056542	0.139257
ENSG00000215482.3	CALM2P3	82.9309	-1.74603	0.270769	-6.44841	1.13e-10	1.11e-09
ENSG00000170162.13	VGLL2	5.41694	-1.74567	1.13504	-1.53799	0.124051	0.262639
ENSG00000115041.12	KCNIP3	84.4273	-1.74483	0.272909	-6.39344	1.62e-10	1.57e-09
ENSG00000166250.11	CLMP	728.751	-1.74454	0.110124	-15.8416	1.61e-56	1.04e-54
ENSG00000164574.15	GALNT10	983.128	-1.74429	0.0955695	-18.2515	2.01e-74	1.97e-72
ENSG00000176171.11	BNIP3	805.996	-1.74397	0.114488	-15.2328	2.14e-52	1.28e-50
ENSG00000270575.1	RP11-21M7.2	6.51428	-1.74299	1.08725	-1.60312	0.108908	0.23723
ENSG00000006534.15	ALDH3B1	245.823	-1.7395	0.173055	-10.0517	9.03e-24	2.03e-22
ENSG00000188549.12	C15orf52	347.071	-1.73913	0.139797	-12.4404	1.58e-35	5.6e-34
ENSG00000272008.1	RP11-393I2.4	7.95475	-1.73864	0.85352	-2.03702	0.0416479	0.108189
ENSG00000181355.20	OFCC1	6.10675	-1.73607	1.1154	-1.55646	0.119598	0.255231
ENSG00000279640.1	RP13-977J11.6	19.1139	-1.73375	0.630416	-2.75016	0.00595663	0.0200389
ENSG00000214274.9	ANG	13.4221	-1.73373	0.83	-2.08884	0.0367225	0.0973902
ENSG00000171608.15	PIK3CD	459.95	-1.73001	0.134067	-12.9041	4.27e-38	1.68e-36
ENSG00000279191.1	RP11-803D5.1	137.805	-1.72993	0.206079	-8.3945	4.68e-17	7.33e-16
ENSG00000203709.10	C1orf132	522.141	-1.7295	0.129234	-13.3827	7.64e-41	3.33e-39
ENSG00000182700.4	IGIP	168.848	-1.72838	0.223253	-7.74179	9.8e-15	1.33e-13
ENSG00000222041.10	LINC00152	381.717	-1.72772	0.136671	-12.6415	1.25e-36	4.62e-35
ENSG00000107738.19	C10orf54	263.861	-1.72545	0.176816	-9.75841	1.7e-22	3.58e-21
ENSG00000236592.5	S100A11P2	4.13164	-1.72451	1.43554	-1.2013	0.229636	0.414882
ENSG00000225043.1	RPL18AP2	3.92611	-1.72326	1.49027	-1.15634	0.247542	0.436746
ENSG00000183853.17	KIRREL	1913.03	-1.72313	0.0882502	-19.5255	6.67e-85	7.72e-83
ENSG00000139793.18	MBNL2	1128.36	-1.72195	0.103581	-16.6241	4.66e-62	3.45e-60
ENSG00000226124.6	FTCDNL1	21.3309	-1.7206	0.541864	-3.17534	0.0014966	0.00575982
ENSG00000223694.1	ADH5P3	32.4898	-1.71946	0.439345	-3.91368	9.09e-05	0.000439746
ENSG00000249717.1	RP11-44F21.3	8.77282	-1.71937	1.76548	-0.973885	0.330114	0.533008
ENSG00000186364.11	NUDT17	29.6002	-1.71866	0.475384	-3.61531	0.000299989	0.00132278
ENSG00000169583.12	CLIC3	51.9647	-1.71848	0.425231	-4.04128	5.32e-05	0.000267714
ENSG00000268764.1	CTC-450M9.1	4.88431	-1.71835	1.83373	-0.937079	0.348718	0.552923
ENSG00000143774.16	GUK1	1834.13	-1.7177	0.0984018	-17.456	3.1e-68	2.61e-66
ENSG00000278959.1	RP11-455I9.1	18.3879	-1.71711	1.26538	-1.357	0.174782	0.340171
ENSG00000168374.10	ARF4	2975.5	-1.71669	0.0925032	-18.5582	7e-77	7.14e-75
ENSG00000265413.1	RP11-789C17.1	9.4969	-1.71626	0.783929	-2.18931	0.0285742	0.0786413
ENSG00000152332.15	UHMK1	4843.85	-1.71549	0.0704438	-24.3526	5.44e-131	1.27e-128
ENSG00000118193.11	KIF14	1524.66	-1.71464	0.0890477	-19.2553	1.27e-82	1.42e-80
ENSG00000167644.11	C19orf33	62.8579	-1.71253	0.353282	-4.84748	1.25e-06	7.92e-06
ENSG00000256083.1	RP11-366L20.3	5.59638	-1.7122	0.986925	-1.73488	0.0827616	0.190386
ENSG00000071127.16	WDR1	3025.02	-1.71192	0.0828838	-20.6545	8.9e-95	1.22e-92
ENSG00000136628.17	EPRS	6349.81	-1.71192	0.0724054	-23.6436	1.38e-123	2.85e-121
ENSG00000249986.1	YWHAQP6	4.01273	-1.71028	1.45662	-1.17414	0.240339	0.427899
ENSG00000170275.14	CRTAP	2746.1	-1.7082	0.0829979	-20.5813	4.04e-94	5.47e-92
ENSG00000260776.5	RP11-114H24.2	3.35842	-1.70768	1.89742	-0.899998	0.368121	0.572685
ENSG00000226232.8	RP11-419C5.2	3.33958	-1.70668	1.91983	-0.888972	0.374018	0.578824
ENSG00000065802.11	ASB1	1550.39	-1.70538	0.0925954	-18.4175	9.51e-76	9.55e-74
ENSG00000229007.1	EXOSC3P1	14.4763	-1.70436	0.611847	-2.78559	0.00534299	0.0181964
ENSG00000214200.2	TPM3P2	6.66053	-1.70396	0.878898	-1.93874	0.0525326	0.131138
ENSG00000238137.2	ARPC3P2	13.6217	-1.70314	0.635592	-2.67961	0.00737091	0.0242092
ENSG00000112893.9	MAN2A1	1913.51	-1.70268	0.0899243	-18.9346	5.92e-80	6.43e-78
ENSG00000240875.5	LINC00886	29.7087	-1.69986	0.433959	-3.9171	8.96e-05	0.000434088
ENSG00000100345.20	MYH9	13552.5	-1.69982	0.083106	-20.4537	5.57e-93	7.43e-91
ENSG00000128965.11	CHAC1	55.4491	-1.69746	0.360579	-4.7076	2.51e-06	1.53e-05
ENSG00000269899.1	RP11-589N15.2	4.5786	-1.69727	1.4345	-1.18318	0.236737	0.42365
ENSG00000226380.8	MIR29A	378.467	-1.6964	0.164544	-10.3097	6.37e-25	1.5e-23
ENSG00000130164.12	LDLR	2095	-1.69226	0.0935614	-18.0872	4.02e-73	3.79e-71
ENSG00000251633.3	GYG1P1	9.81419	-1.69177	0.863713	-1.95871	0.0501464	0.126245
ENSG00000163297.16	ANTXR2	465.931	-1.68865	0.137027	-12.3235	6.77e-35	2.36e-33
ENSG00000249853.7	HS3ST5	11.8749	-1.68848	0.687597	-2.45563	0.0140638	0.0426983
ENSG00000176678.5	FOXL1	31.4656	-1.68794	0.415534	-4.0621	4.86e-05	0.000246234
ENSG00000144677.14	CTDSPL	725.947	-1.68793	0.107385	-15.7185	1.13e-55	7.14e-54
ENSG00000163378.13	EOGT	355	-1.68536	0.133913	-12.5855	2.54e-36	9.29e-35
ENSG00000122691.12	TWIST1	230.763	-1.68496	0.173405	-9.71688	2.55e-22	5.33e-21
ENSG00000105755.7	ETHE1	226.933	-1.68383	0.200361	-8.40398	4.32e-17	6.78e-16
ENSG00000237187.8	NR2F1-AS1	174.311	-1.68319	0.198228	-8.49117	2.05e-17	3.29e-16
ENSG00000250303.3	RP11-356J5.12	60.1183	-1.68264	0.332617	-5.0588	4.22e-07	2.83e-06
ENSG00000114268.11	PFKFB4	96.9057	-1.68232	0.297479	-5.65526	1.56e-08	1.25e-07
ENSG00000248571.1	RP11-768B22.2	6.70232	-1.68047	0.955179	-1.75933	0.0785224	0.182228
ENSG00000102452.15	NALCN	372.91	-1.6784	0.144505	-11.6149	3.46e-31	1.06e-29
ENSG00000259682.1	RP11-702L15.4	9.38145	-1.67808	0.858839	-1.95389	0.0507138	0.127457
ENSG00000149591.16	TAGLN	62.6962	-1.67788	0.298431	-5.62232	1.88e-08	1.49e-07
ENSG00000084636.17	COL16A1	26.963	-1.67515	0.45766	-3.66024	0.000251982	0.00112788
ENSG00000267201.1	AC005624.2	7.9747	-1.67477	0.880708	-1.90162	0.0572216	0.140562
ENSG00000140836.14	ZFHX3	1744.25	-1.67433	0.0925631	-18.0885	3.92e-73	3.72e-71
ENSG00000064652.10	SNX24	391.881	-1.6734	0.14102	-11.8664	1.77e-32	5.65e-31
ENSG00000106829.18	TLE4	906.589	-1.66933	0.0989722	-16.8666	7.92e-64	6.26e-62
ENSG00000230154.1	AC018463.4	63.7126	-1.66572	0.320045	-5.20464	1.94e-07	1.36e-06
ENSG00000230439.2	RP11-488P3.1	11.6426	-1.66488	0.69686	-2.38911	0.0168891	0.0499817
ENSG00000223813.2	AC007255.8	6.3211	-1.66473	0.90096	-1.84772	0.0646422	0.155518
ENSG00000137076.19	TLN1	7345.55	-1.66322	0.0814737	-20.4142	1.25e-92	1.66e-90
ENSG00000258101.2	RP11-977B10.2	8.2747	-1.66153	0.783462	-2.12076	0.0339423	0.0910988
ENSG00000165996.13	HACD1	179.173	-1.66139	0.195774	-8.48629	2.13e-17	3.43e-16
ENSG00000141905.17	NFIC	1882.08	-1.66098	0.0988031	-16.811	2.03e-63	1.58e-61
ENSG00000136560.13	TANK	315.575	-1.66096	0.148664	-11.1726	5.55e-29	1.54e-27
ENSG00000184922.13	FMNL1	445.612	-1.65951	0.140879	-11.7797	4.96e-32	1.57e-30
ENSG00000234496.2	MRPS21P1	8.59983	-1.65885	0.79753	-2.07998	0.0375272	0.0992439
ENSG00000267796.7	LIN37	98.8309	-1.65837	0.310158	-5.34685	8.95e-08	6.52e-07
ENSG00000242510.1	NDUFB4P1	7.74427	-1.65769	0.879379	-1.88507	0.0594203	0.145139
ENSG00000251062.1	CTD-2218G20.1	10.872	-1.65618	0.785087	-2.10955	0.0348972	0.0932082
ENSG00000119681.11	LTBP2	259.284	-1.65558	0.174244	-9.50149	2.07e-21	4.14e-20
ENSG00000229953.1	RP11-284F21.7	9.31104	-1.65359	0.795196	-2.07948	0.0375731	0.0993465
ENSG00000164197.11	RNF180	116.293	-1.65215	0.253923	-6.50651	7.69e-11	7.63e-10
ENSG00000111859.16	NEDD9	143.462	-1.65206	0.204771	-8.06783	7.16e-16	1.04e-14
ENSG00000240733.3	RN7SL502P	8.66444	-1.65146	0.862581	-1.91456	0.0555491	0.137435
ENSG00000276542.1	RP11-115D19.2	9.22717	-1.65064	0.889387	-1.85593	0.0634643	0.153166
ENSG00000229596.3	MYL8P	33.3132	-1.65049	0.428878	-3.8484	0.000118893	0.000562314
ENSG00000224273.2	AC005077.7	9.03962	-1.64967	0.797238	-2.06923	0.0385246	0.101348
ENSG00000125618.16	PAX8	14.1003	-1.64864	0.666913	-2.47204	0.0134343	0.0410439
ENSG00000260025.1	RP11-490M8.1	40.5428	-1.6486	0.473358	-3.48279	0.000496223	0.00210241
ENSG00000196639.6	HRH1	84.0947	-1.64846	0.258023	-6.38882	1.67e-10	1.61e-09
ENSG00000119673.14	ACOT2	109.106	-1.64737	0.232241	-7.09337	1.31e-12	1.5e-11
ENSG00000239455.1	RP11-561O4.1	36.3761	-1.64667	0.404135	-4.07454	4.61e-05	0.000234025
ENSG00000277224.2	HIST1H2BF	274.451	-1.64604	0.14968	-10.997	3.95e-28	1.06e-26
ENSG00000256043.2	CTSO	81.8999	-1.64583	0.292642	-5.62404	1.87e-08	1.48e-07
ENSG00000230074.1	RP11-195F19.9	26.0962	-1.6444	0.592529	-2.77522	0.00551639	0.0187055
ENSG00000172260.14	NEGR1	384.396	-1.64422	0.144755	-11.3586	6.72e-30	1.95e-28
ENSG00000166073.9	GPR176	149.937	-1.64403	0.229747	-7.15585	8.32e-13	9.72e-12
ENSG00000230650.1	AC112229.1	5.96621	-1.64254	1.0051	-1.63421	0.102216	0.225675
ENSG00000274791.1	F8A2	11.3103	-1.64129	0.698564	-2.34953	0.0187973	0.0547252
ENSG00000265399.1	RP13-270P17.2	6.51232	-1.63923	0.941898	-1.74035	0.081797	0.188521
ENSG00000096060.14	FKBP5	2403.96	-1.63807	0.0747777	-21.9058	2.29e-106	3.85e-104
ENSG00000143367.15	TUFT1	809.896	-1.63792	0.12461	-13.1444	1.83e-39	7.51e-38
ENSG00000263189.1	RP11-618P13.1	5.76884	-1.63694	1.02427	-1.59815	0.11001	0.239149
ENSG00000150961.14	SEC24D	1644.84	-1.63646	0.0952688	-17.1773	3.93e-66	3.22e-64
ENSG00000235162.8	C12orf75	1209.76	-1.6361	0.0962378	-17.0005	8.14e-65	6.47e-63
ENSG00000199990.1	VTRNA1-1	7.60593	-1.63407	0.810453	-2.01624	0.0437746	0.112628
ENSG00000226995.7	LINC00658	7.1895	-1.63333	0.926118	-1.76363	0.0777942	0.180941
ENSG00000154027.18	AK5	74.1039	-1.63269	0.401575	-4.06572	4.79e-05	0.000242657
ENSG00000047056.14	WDR37	316.383	-1.63202	0.152085	-10.731	7.28e-27	1.85e-25
ENSG00000231566.1	RP5-1158E12.3	13.836	-1.63202	0.721659	-2.26148	0.0237296	0.0669718
ENSG00000169814.12	BTD	138.049	-1.63045	0.215744	-7.55735	4.11e-14	5.32e-13
ENSG00000233621.1	LINC01137	13.7167	-1.62947	0.702967	-2.31798	0.0204502	0.0588855
ENSG00000225282.1	AP000350.6	15.5184	-1.62906	0.613828	-2.65394	0.00795578	0.0259184
ENSG00000244671.3	RN7SL280P	8.22885	-1.62716	0.931589	-1.74666	0.0806973	0.186476
ENSG00000180353.10	HCLS1	53.5241	-1.62706	0.354787	-4.58601	4.52e-06	2.66e-05
ENSG00000181804.14	SLC9A9	30.1981	-1.62446	0.485305	-3.34731	0.000816004	0.00332655
ENSG00000151491.12	EPS8	835.214	-1.62406	0.100714	-16.1254	1.69e-58	1.15e-56
ENSG00000236607.3	EEF1DP8	9.41101	-1.62292	0.78757	-2.06067	0.0393343	0.103074
ENSG00000259396.1	RP11-16O9.2	7.7338	-1.62161	0.963654	-1.68277	0.0924191	0.208261
ENSG00000213514.2	RP11-428P16.2	23.1065	-1.61871	0.513989	-3.14931	0.00163657	0.00624218
ENSG00000273269.1	RP11-761B3.1	5.38141	-1.61651	1.02407	-1.57852	0.114447	0.246778
ENSG00000279358.1	RP11-688I9.5	21.7632	-1.6159	0.555257	-2.91018	0.00361222	0.0127703
ENSG00000110921.12	MVK	345.023	-1.61552	0.143701	-11.2422	2.53e-29	7.11e-28
ENSG00000069275.12	NUCKS1	11726.2	-1.61445	0.0639069	-25.2625	8.25e-141	2.11e-138
ENSG00000251169.2	AC005355.2	14.6028	-1.61418	0.63384	-2.54666	0.0108758	0.0342
ENSG00000276588.1	RN7SL322P	8.87685	-1.61281	0.86452	-1.86556	0.062103	0.150581
ENSG00000184349.12	EFNA5	932.793	-1.61258	0.100334	-16.0721	4e-58	2.69e-56
ENSG00000180346.3	TIGD2	165.317	-1.61235	0.20325	-7.93285	2.14e-15	3.02e-14
ENSG00000268318.5	CTD-3187F8.11	9.18657	-1.60938	0.814621	-1.97561	0.0481986	0.122216
ENSG00000239413.1	RPS27P23	8.66886	-1.6079	0.816446	-1.96938	0.048909	0.123572
ENSG00000089159.16	PXN	2182.41	-1.60719	0.0808301	-19.8836	5.65e-88	6.91e-86
ENSG00000257070.1	RP11-667M19.4	7.03246	-1.6071	0.997592	-1.61098	0.107185	0.234257
ENSG00000274471.1	RP11-228M15.1	15.791	-1.60548	0.631904	-2.54071	0.0110628	0.0347066
ENSG00000131711.14	MAP1B	3288.01	-1.60497	0.0825965	-19.4314	4.19e-84	4.77e-82
ENSG00000251128.1	WWC2-AS1	3.92523	-1.60457	1.3717	-1.16976	0.242096	0.430076
ENSG00000137203.10	TFAP2A	1187.03	-1.60434	0.104462	-15.3581	3.13e-53	1.88e-51
ENSG00000134375.10	TIMM17A	1272.3	-1.60413	0.100192	-16.0106	1.08e-57	7.21e-56
ENSG00000250829.2	RP11-11N5.1	5.82773	-1.60412	1.0983	-1.46055	0.14414	0.295106
ENSG00000232184.1	RP11-370K11.1	5.92503	-1.60394	1.09029	-1.47111	0.14126	0.290602
ENSG00000163430.10	FSTL1	5361.75	-1.60391	0.18497	-8.67117	4.28e-18	7.11e-17
ENSG00000137871.19	ZNF280D	660.027	-1.60334	0.124279	-12.9012	4.43e-38	1.74e-36
ENSG00000140563.14	MCTP2	457.477	-1.60099	0.149578	-10.7034	9.81e-27	2.46e-25
ENSG00000048052.21	HDAC9	200.644	-1.59964	0.202551	-7.89748	2.85e-15	3.99e-14
ENSG00000260455.1	NBAT1	1.84529	-1.59809	2.48937	-0.641966	0.520895	0.713553
ENSG00000205035.8	RP11-707M1.1	1.8296	-1.59782	2.48223	-0.643705	0.519767	0.712492
ENSG00000224959.1	AC017002.2	52.5624	-1.59775	0.340623	-4.69068	2.72e-06	1.65e-05
ENSG00000229118.1	AC068491.2	9.5861	-1.59772	0.738623	-2.1631	0.0305331	0.0832913
ENSG00000134046.11	MBD2	835.738	-1.59697	0.108324	-14.7426	3.43e-49	1.86e-47
ENSG00000198598.6	MMP17	230.991	-1.59657	0.194048	-8.2277	1.91e-16	2.88e-15
ENSG00000130429.12	ARPC1B	1036.65	-1.59611	0.0976877	-16.339	5.21e-60	3.67e-58
ENSG00000118200.14	CAMSAP2	1689.25	-1.59516	0.0930313	-17.1464	6.68e-66	5.45e-64
ENSG00000177464.4	GPR4	25.2392	-1.59481	0.502878	-3.17136	0.00151725	0.00582895
ENSG00000184743.12	ATL3	1818.39	-1.5944	0.0826578	-19.2891	6.63e-83	7.43e-81
ENSG00000230109.1	RP11-275N1.1	5.90166	-1.59439	1.0473	-1.52238	0.127913	0.269027
ENSG00000263674.1	RP11-443G13.2	2.24977	-1.59367	2.36136	-0.674895	0.499742	0.695821
ENSG00000233457.1	RP11-336N8.1	5.25971	-1.59353	1.13418	-1.40501	0.160019	0.319102
ENSG00000267691.1	SHC1P2	51.4785	-1.59229	0.345209	-4.61254	3.98e-06	2.36e-05
ENSG00000051128.18	HOMER3	244.989	-1.59128	0.173139	-9.19076	3.9e-20	7.25e-19
ENSG00000182557.7	SPNS3	3.14701	-1.59098	2.28633	-0.695866	0.486513	0.683148
ENSG00000144188.9	TRIM43CP	3.11872	-1.59031	2.2704	-0.700454	0.483644	0.680954
ENSG00000272821.1	CTA-384D8.36	11.9721	-1.58996	0.683663	-2.32565	0.0200373	0.0578253
ENSG00000023572.8	GLRX2	174.738	-1.58884	0.187263	-8.48454	2.17e-17	3.48e-16
ENSG00000274272.1	RP11-44M6.7	19.1011	-1.5887	0.643419	-2.46916	0.0135432	0.0413181
ENSG00000168918.13	INPP5D	193.49	-1.58807	0.245229	-6.47586	9.43e-11	9.29e-10
ENSG00000154134.14	ROBO3	176.662	-1.58698	0.23071	-6.8787	6.04e-12	6.58e-11
ENSG00000273703.1	HIST1H2BM	66.7591	-1.58568	0.286668	-5.53142	3.18e-08	2.44e-07
ENSG00000272777.1	RP11-571L19.8	10.0926	-1.58562	0.797824	-1.98743	0.0468745	0.119451
ENSG00000243910.7	TUBA4B	49.983	-1.58362	0.327769	-4.83152	1.35e-06	8.55e-06
ENSG00000271064.1	RP11-792A8.3	10.8231	-1.58289	0.994867	-1.59106	0.111597	0.241889
ENSG00000140939.14	NOL3	139.836	-1.5816	0.227827	-6.94209	3.86e-12	4.28e-11
ENSG00000176014.12	TUBB6	1820.23	-1.58129	0.0895459	-17.659	8.67e-70	7.67e-68
ENSG00000255150.2	EID3	150.385	-1.57901	0.219256	-7.20168	5.95e-13	7.07e-12
ENSG00000243847.3	RN7SL610P	74.3228	-1.57886	0.313428	-5.03739	4.72e-07	3.15e-06
ENSG00000149571.11	KIRREL3	104.113	-1.57858	0.296789	-5.31887	1.04e-07	7.55e-07
ENSG00000120594.16	PLXDC2	238.767	-1.57827	0.194712	-8.10567	5.25e-16	7.7e-15
ENSG00000186832.8	KRT16	6.29911	-1.57617	2.16086	-0.729419	0.465745	0.665527
ENSG00000182053.12	TRIM49B	5.23914	-1.57547	2.18438	-0.721244	0.47076	0.669851
ENSG00000238273.3	AC012360.6	61.7867	-1.57537	0.303988	-5.18234	2.19e-07	1.52e-06
ENSG00000163235.15	TGFA	32.5058	-1.57535	0.475545	-3.31272	0.000923924	0.00372388
ENSG00000030419.16	IKZF2	104.48	-1.57524	0.257024	-6.12877	8.86e-10	7.99e-09
ENSG00000224391.1	LINC01280	4.57475	-1.57461	2.22057	-0.709101	0.478262	0.676218
ENSG00000008283.15	CYB561	463.106	-1.57218	0.134411	-11.6968	1.32e-31	4.1e-30
ENSG00000151418.11	ATP6V1G3	2.64552	-1.57209	2.33626	-0.67291	0.501005	0.696752
ENSG00000261801.5	LOXL1-AS1	145.667	-1.57181	0.206964	-7.59462	3.09e-14	4.03e-13
ENSG00000236175.3	SSU72P6	2.34433	-1.57169	2.35352	-0.667806	0.504258	0.699475
ENSG00000230015.3	RP11-80B9.4	2.4867	-1.57165	2.35893	-0.666257	0.505247	0.700194
ENSG00000240661.3	RP11-174O3.3	28.6934	-1.57155	0.476191	-3.30025	0.00096599	0.0038812
ENSG00000227495.1	AC109333.10	5.87641	-1.5699	1.21102	-1.29634	0.194858	0.368588
ENSG00000258300.2	NUTF2P2	6.23876	-1.5691	0.948581	-1.65416	0.0980957	0.218355
ENSG00000089505.17	CMTM1	17.7371	-1.568	0.566161	-2.76953	0.00561367	0.0190033
ENSG00000104549.11	SQLE	1941.92	-1.56745	0.10525	-14.8926	3.68e-50	2.08e-48
ENSG00000259865.1	RP11-488L18.10	87.4642	-1.56736	0.273609	-5.72848	1.01e-08	8.25e-08
ENSG00000067082.14	KLF6	1058.79	-1.56513	0.0987885	-15.8432	1.57e-56	1.01e-54
ENSG00000165480.15	SKA3	370.357	-1.56336	0.13278	-11.774	5.31e-32	1.67e-30
ENSG00000259556.2	RP11-56B16.2	8.25081	-1.5624	0.81544	-1.91602	0.0553628	0.137097
ENSG00000225032.5	RP11-228B15.4	22.4104	-1.56072	0.526646	-2.96351	0.00304157	0.0109426
ENSG00000249138.1	SLED1	5.79636	-1.55962	1.2064	-1.29279	0.196083	0.370384
ENSG00000225872.3	LINC01529	6.19178	-1.55939	1.19625	-1.30356	0.192382	0.365133
ENSG00000162819.11	BROX	1014.57	-1.55691	0.105161	-14.8051	1.36e-49	7.48e-48
ENSG00000234213.1	FHP1	20.6887	-1.55459	0.555051	-2.80082	0.00509736	0.017421
ENSG00000113916.17	BCL6	411.671	-1.55384	0.160663	-9.67148	3.99e-22	8.23e-21
ENSG00000113083.12	LOX	970.162	-1.55353	0.131833	-11.7841	4.71e-32	1.49e-30
ENSG00000164241.13	C5orf63	65.7762	-1.55304	0.307017	-5.05848	4.23e-07	2.84e-06
ENSG00000241990.5	PRR34-AS1	19.7333	-1.55243	0.519747	-2.9869	0.00281825	0.0102083
ENSG00000119686.9	FLVCR2	36.9786	-1.55126	0.369137	-4.20239	2.64e-05	0.000139235
ENSG00000271779.1	RP11-87N3.6	5.81076	-1.54944	1.20429	-1.28661	0.198231	0.373513
ENSG00000265393.1	CTD-2517M22.17	4.05979	-1.54922	1.33842	-1.1575	0.247069	0.436184
ENSG00000128340.14	RAC2	583.073	-1.54818	0.134749	-11.4893	1.49e-30	4.43e-29
ENSG00000143256.4	PFDN2	805.872	-1.54759	0.120701	-12.8216	1.24e-37	4.8e-36
ENSG00000147394.18	ZNF185	331.768	-1.5461	0.154437	-10.0112	1.36e-23	3.02e-22
ENSG00000279633.1	RP11-442G21.2	17.9416	-1.54594	0.698756	-2.21242	0.0269375	0.074692
ENSG00000108448.20	TRIM16L	277.637	-1.54574	0.150592	-10.2644	1.02e-24	2.4e-23
ENSG00000213625.8	LEPROT	871.061	-1.54519	0.108054	-14.3002	2.18e-46	1.1e-44
ENSG00000177694.15	NAALADL2	57.6524	-1.5451	0.347234	-4.44973	8.6e-06	4.86e-05
ENSG00000279841.1	RP11-274A11.4	14.1708	-1.54495	0.664305	-2.32567	0.0200362	0.0578253
ENSG00000228499.1	TMSB10P1	72.9746	-1.54337	0.298949	-5.16266	2.43e-07	1.68e-06
ENSG00000104884.14	ERCC2	1681.45	-1.54295	0.103958	-14.842	7.84e-50	4.34e-48
ENSG00000172250.14	SERHL	7.91528	-1.54052	1.16572	-1.32152	0.186328	0.356674
ENSG00000243710.7	CFAP57	11.5304	-1.53892	0.858818	-1.79191	0.0731478	0.172332
ENSG00000140030.5	GPR65	40.3965	-1.53866	0.397474	-3.87111	0.000108341	0.000517099
ENSG00000110080.18	ST3GAL4	338.188	-1.53864	0.157233	-9.78576	1.3e-22	2.75e-21
ENSG00000170458.13	CD14	13.0132	-1.53752	0.661478	-2.32436	0.020106	0.0580012
ENSG00000073464.11	CLCN4	176.584	-1.53651	0.191061	-8.04201	8.84e-16	1.28e-14
ENSG00000241852.9	C8orf58	85.0059	-1.53578	0.257072	-5.97413	2.31e-09	2.01e-08
ENSG00000264978.2	RN7SL630P	10.8849	-1.53555	0.766691	-2.00282	0.0451961	0.115866
ENSG00000117335.19	CD46	3210.82	-1.53512	0.0748771	-20.5019	2.07e-93	2.78e-91
ENSG00000228767.1	KRT8P18	20.3613	-1.53355	0.480565	-3.19114	0.00141715	0.00548255
ENSG00000227082.1	CH17-437K3.1	10.7559	-1.53253	0.707076	-2.16741	0.0302033	0.0825436
ENSG00000198417.6	MT1F	23.1428	-1.53236	0.500734	-3.06024	0.0022116	0.00820415
ENSG00000087095.12	NLK	438.152	-1.53186	0.124478	-12.3063	8.38e-35	2.89e-33
ENSG00000167508.11	MVD	662.345	-1.53134	0.131123	-11.6787	1.64e-31	5.07e-30
ENSG00000231501.1	MTND4LP1	6.08613	-1.53132	0.929528	-1.64742	0.0994718	0.220638
ENSG00000275322.1	RP11-262A16.1	12.5698	-1.53023	0.67395	-2.27053	0.0231753	0.065565
ENSG00000120318.15	ARAP3	548.213	-1.53023	0.118458	-12.9178	3.57e-38	1.41e-36
ENSG00000240298.3	RPL36AP40	8.80296	-1.52999	0.778745	-1.96469	0.0494504	0.12466
ENSG00000035681.7	NSMAF	921.346	-1.52887	0.112269	-13.618	3.13e-42	1.41e-40
ENSG00000109790.16	KLHL5	1166.93	-1.5288	0.0989074	-15.4569	6.78e-54	4.15e-52
ENSG00000155368.16	DBI	505.818	-1.52855	0.151206	-10.109	5.04e-24	1.15e-22
ENSG00000188158.14	NHS	102.08	-1.52811	0.277935	-5.49808	3.84e-08	2.93e-07
ENSG00000227230.1	RP11-261C10.5	10.6145	-1.52703	0.750253	-2.03535	0.0418155	0.108514
ENSG00000119684.15	MLH3	170.101	-1.5268	0.190919	-7.99708	1.27e-15	1.83e-14
ENSG00000124496.12	TRERF1	346.438	-1.52652	0.136824	-11.1568	6.64e-29	1.83e-27
ENSG00000170017.12	ALCAM	2737.52	-1.52615	0.0757629	-20.1438	3.05e-90	3.95e-88
ENSG00000006432.15	MAP3K9	723.072	-1.52512	0.115692	-13.1826	1.11e-39	4.58e-38
ENSG00000250496.2	ABT1P1	5.12498	-1.52479	1.09976	-1.38647	0.165604	0.327012
ENSG00000100344.10	PNPLA3	219.271	-1.52458	0.19944	-7.64431	2.1e-14	2.78e-13
ENSG00000115641.18	FHL2	1151.78	-1.52306	0.0941275	-16.1808	6.89e-59	4.73e-57
ENSG00000166979.12	EVA1C	83.7228	-1.52129	0.272741	-5.57778	2.44e-08	1.9e-07
ENSG00000183255.11	PTTG1IP	3856.67	-1.52066	0.0811813	-18.7316	2.73e-78	2.87e-76
ENSG00000109062.10	SLC9A3R1	785.314	-1.51971	0.115032	-13.2112	7.56e-40	3.16e-38
ENSG00000251429.1	RP11-597D13.7	60.925	-1.51949	0.327104	-4.64529	3.4e-06	2.04e-05
ENSG00000279569.1	RP11-394B2.1	19.4954	-1.51829	0.567263	-2.67652	0.00743922	0.024408
ENSG00000263716.1	SLC25A51P2	5.15263	-1.51785	1.05635	-1.43688	0.150753	0.305446
ENSG00000034510.5	TMSB10	7800.79	-1.51661	0.208662	-7.26825	3.64e-13	4.41e-12
ENSG00000111450.13	STX2	900.327	-1.51632	0.108821	-13.9341	3.93e-44	1.84e-42
ENSG00000187537.13	POTEG	181.709	-1.51541	0.194982	-7.77206	7.72e-15	1.05e-13
ENSG00000143499.13	SMYD2	583.242	-1.51514	0.118404	-12.7964	1.72e-37	6.57e-36
ENSG00000137699.16	TRIM29	23.2555	-1.5148	0.549903	-2.75466	0.00587525	0.0197935
ENSG00000256618.2	MTRNR2L1	16.802	-1.51464	1.82515	-0.829871	0.406612	0.612061
ENSG00000253374.5	RP11-257P3.3	7.37325	-1.51368	0.869754	-1.74036	0.0817966	0.188521
ENSG00000279605.1	RP11-661A12.8	17.0805	-1.51274	0.544204	-2.77973	0.00544041	0.0184768
ENSG00000159884.11	CCDC107	42.763	-1.51254	0.410611	-3.68364	0.00022993	0.00103627
ENSG00000204113.6	BMP2KL	18.2222	-1.51117	0.610653	-2.47467	0.0133358	0.040774
ENSG00000230146.1	SEPHS1P4	13.1753	-1.5109	0.593101	-2.54746	0.0108509	0.0341371
ENSG00000259232.2	RP11-349G13.1	5.07151	-1.51069	1.08306	-1.39483	0.163068	0.323481
ENSG00000272576.1	RP11-365H22.2	6.75817	-1.51035	1.01929	-1.48178	0.1384	0.286081
ENSG00000076944.15	STXBP2	166.724	-1.50674	0.22262	-6.76822	1.3e-11	1.38e-10
ENSG00000231185.6	AC005592.2	20.9657	-1.50368	0.534627	-2.81258	0.00491463	0.01686
ENSG00000105137.12	SYDE1	730.195	-1.50313	0.110334	-13.6234	2.91e-42	1.31e-40
ENSG00000224117.1	PTPN2P2	9.32681	-1.50289	0.792222	-1.89706	0.05782	0.141796
ENSG00000238213.1	TARDBPP2	29.6597	-1.50285	0.449501	-3.34337	0.00082766	0.00336967
ENSG00000275992.1	RN7SL327P	4.96973	-1.50177	1.02331	-1.46756	0.142224	0.291992
ENSG00000137309.19	HMGA1	4449.47	-1.5015	0.0844294	-17.7841	9.39e-71	8.44e-69
ENSG00000185483.11	ROR1	381.596	-1.5006	0.1331	-11.2742	1.76e-29	4.99e-28
ENSG00000075624.13	ACTB	24273.6	-1.50039	0.0881555	-17.0198	5.86e-65	4.68e-63
ENSG00000143702.15	CEP170	2116.74	-1.50015	0.0814129	-18.4265	8.06e-76	8.16e-74
ENSG00000119865.8	CNRIP1	119.882	-1.49985	0.228676	-6.55885	5.42e-11	5.45e-10
ENSG00000123240.16	OPTN	611.231	-1.49755	0.138309	-10.8275	2.55e-27	6.57e-26
ENSG00000124813.20	RUNX2	483.593	-1.49744	0.132043	-11.3405	8.26e-30	2.38e-28
ENSG00000196114.3	RP3-391O22.3	9.92731	-1.49729	0.771768	-1.94008	0.0523695	0.130812
ENSG00000138639.17	ARHGAP24	123.495	-1.49713	0.237533	-6.30284	2.92e-10	2.76e-09
ENSG00000171388.11	APLN	9.04523	-1.49666	0.749679	-1.9964	0.0458901	0.117314
ENSG00000076928.17	ARHGEF1	835.539	-1.49597	0.112605	-13.285	2.83e-40	1.21e-38
ENSG00000250602.5	RP11-517I3.1	7.85323	-1.49472	0.929666	-1.6078	0.107879	0.235426
ENSG00000215864.5	NBPF7	9.26524	-1.49439	0.800636	-1.86651	0.06197	0.15031
ENSG00000135636.13	DYSF	461.857	-1.49436	0.257187	-5.81041	6.23e-09	5.18e-08
ENSG00000261697.5	RP11-178L8.5	5.82974	-1.49364	0.95027	-1.57181	0.115995	0.249329
ENSG00000135926.13	TMBIM1	1245.52	-1.49266	0.0966491	-15.4441	8.27e-54	5.04e-52
ENSG00000023892.10	DEF6	89.5921	-1.48963	0.277829	-5.36168	8.25e-08	6.04e-07
ENSG00000128284.19	APOL3	12.2514	-1.48933	0.747939	-1.99124	0.0464544	0.118535
ENSG00000132429.9	POPDC3	123.563	-1.48931	0.235205	-6.33196	2.42e-10	2.3e-09
ENSG00000225703.1	AC005522.7	3.90547	-1.4877	1.53661	-0.968169	0.33296	0.535939
ENSG00000141429.13	GALNT1	1222.27	-1.4876	0.0943891	-15.7603	5.84e-56	3.73e-54
ENSG00000159899.14	NPR2	24.0041	-1.48632	0.496997	-2.99061	0.00278421	0.010098
ENSG00000218976.2	RP11-528A10.1	10.9753	-1.48426	0.679309	-2.18496	0.0288921	0.0794152
ENSG00000162704.15	ARPC5	2078.72	-1.48363	0.0828553	-17.9063	1.05e-71	9.63e-70
ENSG00000100526.19	CDKN3	345.866	-1.48342	0.141962	-10.4494	1.48e-25	3.54e-24
ENSG00000213087.3	RP11-613F7.1	21.8464	-1.48316	0.507481	-2.92259	0.00347133	0.0123202
ENSG00000230849.2	GOT2P2	24.7024	-1.48184	0.465164	-3.18562	0.00144443	0.00558041
ENSG00000231345.3	BEND3P1	47.3438	-1.48041	0.361342	-4.09699	4.19e-05	0.000214394
ENSG00000125726.10	CD70	104.22	-1.47917	0.317819	-4.65411	3.25e-06	1.96e-05
ENSG00000229840.2	ISCA1P2	7.40707	-1.47861	0.83414	-1.77261	0.0762928	0.178067
ENSG00000162909.17	CAPN2	7120.43	-1.47827	0.0705946	-20.9403	2.3e-97	3.27e-95
ENSG00000185404.16	SP140L	210.061	-1.47797	0.182839	-8.08344	6.3e-16	9.17e-15
ENSG00000152818.18	UTRN	2848.52	-1.47688	0.0743852	-19.8545	1.01e-87	1.23e-85
ENSG00000177425.10	PAWR	2286.32	-1.47593	0.0814394	-18.123	2.1e-73	2.01e-71
ENSG00000253837.1	RP11-177H13.2	142.138	-1.47572	0.206351	-7.1515	8.58e-13	1e-11
ENSG00000248288.1	CTD-2194F4.2	11.1479	-1.47562	0.731455	-2.01738	0.0436562	0.11239
ENSG00000224057.1	EGFR-AS1	36.3742	-1.47536	0.392251	-3.76126	0.000169058	0.000777743
ENSG00000203706.8	SERTAD4-AS1	42.6645	-1.47419	0.370729	-3.97647	6.99e-05	0.000344223
ENSG00000131746.12	TNS4	50.2452	-1.47326	0.329629	-4.46945	7.84e-06	4.46e-05
ENSG00000160796.16	NBEAL2	649.693	-1.47314	0.112009	-13.152	1.66e-39	6.83e-38
ENSG00000171241.8	SHCBP1	775.621	-1.47303	0.11013	-13.3754	8.42e-41	3.66e-39
ENSG00000273445.1	RP11-1399P15.1	27.2428	-1.47278	0.447088	-3.29416	0.000987153	0.0039555
ENSG00000245060.6	LINC00847	89.8417	-1.47271	0.264832	-5.56092	2.68e-08	2.09e-07
ENSG00000164930.11	FZD6	1276.45	-1.47244	0.0948412	-15.5253	2.34e-54	1.45e-52
ENSG00000233674.2	RP11-184I16.3	4.46764	-1.4718	1.16661	-1.2616	0.207094	0.38554
ENSG00000267101.5	RP11-846C15.2	5.12654	-1.47165	1.15821	-1.27063	0.203861	0.381338
ENSG00000196747.4	HIST1H2AI	549.146	-1.47154	0.128094	-11.4879	1.52e-30	4.5e-29
ENSG00000162512.15	SDC3	1114.01	-1.47125	0.100287	-14.6704	9.98e-49	5.38e-47
ENSG00000118990.5	GLRXP3	10.6056	-1.47018	0.887018	-1.65744	0.09743	0.217153
ENSG00000243789.10	JMJD7	3.76925	-1.47009	1.52977	-0.960987	0.336559	0.539602
ENSG00000171532.4	NEUROD2	8.2895	-1.46964	1.05315	-1.39548	0.162873	0.323184
ENSG00000228797.2	FAM207BP	31.9562	-1.46949	0.419154	-3.50586	0.000455142	0.00194092
ENSG00000259904.1	ACTG1P15	77.6854	-1.46838	0.26187	-5.60726	2.06e-08	1.62e-07
ENSG00000279685.2	MAPT-IT1	4.38783	-1.4679	1.46548	-1.00165	0.316512	0.517576
ENSG00000267170.1	CALM2P1	8.09338	-1.46784	0.859818	-1.70715	0.087794	0.199661
ENSG00000228288.6	PCAT6	10.7339	-1.46715	1.00334	-1.46227	0.143666	0.29433
ENSG00000163739.4	CXCL1	43.441	-1.4671	0.39221	-3.7406	0.00018358	0.000840293
ENSG00000139192.11	TAPBPL	37.3199	-1.46705	0.426977	-3.4359	0.000590594	0.00247652
ENSG00000188859.6	FAM78B	7.34998	-1.46671	0.869989	-1.68589	0.091817	0.207236
ENSG00000229190.1	RP11-390B4.3	7.50029	-1.4664	1.36576	-1.07369	0.282961	0.479352
ENSG00000074657.13	ZNF532	497.962	-1.46603	0.125641	-11.6684	1.85e-31	5.71e-30
ENSG00000002834.17	LASP1	3517.05	-1.46602	0.0783749	-18.7052	4.49e-78	4.69e-76
ENSG00000260490.2	MYL12BP1	52.3671	-1.46468	0.343672	-4.26185	2.03e-05	0.000108548
ENSG00000182795.12	C1orf116	15.7019	-1.46337	0.82002	-1.78455	0.0743339	0.174566
ENSG00000223401.2	RP11-211G3.2	7.84069	-1.46159	1.0555	-1.38474	0.166132	0.327781
ENSG00000249741.2	RP11-673E1.3	57.0763	-1.46062	0.319531	-4.57114	4.85e-06	2.84e-05
ENSG00000198363.16	ASPH	2750.25	-1.45963	0.0872406	-16.7311	7.78e-63	5.94e-61
ENSG00000262480.2	SAMD11P1	10.2198	-1.45863	0.876307	-1.66452	0.0960087	0.214709
ENSG00000075426.11	FOSL2	1701.12	-1.45738	0.0928584	-15.6947	1.65e-55	1.04e-53
ENSG00000271601.3	LIX1L	937.628	-1.45735	0.101351	-14.3792	6.99e-47	3.57e-45
ENSG00000139289.13	PHLDA1	1551	-1.45716	0.111154	-13.1094	2.91e-39	1.18e-37
ENSG00000106733.20	NMRK1	71.3709	-1.45651	0.310785	-4.68654	2.78e-06	1.68e-05
ENSG00000151917.17	BEND6	69.177	-1.45602	0.336077	-4.3324	1.47e-05	8.08e-05
ENSG00000266920.1	ACTBP9	160.218	-1.45597	0.201239	-7.23503	4.65e-13	5.57e-12
ENSG00000184470.20	TXNRD2	768.918	-1.4553	0.110697	-13.1466	1.78e-39	7.31e-38
ENSG00000164520.11	RAET1E	42.2815	-1.4548	0.358827	-4.05434	5.03e-05	0.000254057
ENSG00000128335.13	APOL2	382.979	-1.45467	0.144134	-10.0925	5.96e-24	1.35e-22
ENSG00000136636.12	KCTD3	1543.18	-1.45362	0.0829217	-17.53	8.46e-69	7.26e-67
ENSG00000244199.1	EIF4EP3	6.96242	-1.45359	0.9345	-1.55547	0.119834	0.255542
ENSG00000213549.3	AC005077.8	3.43668	-1.4529	1.52771	-0.951031	0.341589	0.545154
ENSG00000154328.15	NEIL2	156.341	-1.45255	0.192797	-7.5341	4.92e-14	6.33e-13
ENSG00000134030.13	CTIF	856.582	-1.45223	0.107908	-13.458	2.76e-41	1.22e-39
ENSG00000153904.18	DDAH1	2189.21	-1.4522	0.0896706	-16.1948	5.49e-59	3.79e-57
ENSG00000282855.1	RP11-50D9.4	6.4577	-1.45207	1.1114	-1.30652	0.191375	0.363687
ENSG00000240577.3	RN7SL445P	6.44678	-1.45092	1.0037	-1.44558	0.148296	0.301554
ENSG00000161944.16	ASGR2	5.35884	-1.45043	1.14782	-1.26364	0.20636	0.384555
ENSG00000173535.13	TNFRSF10C	18.9942	-1.44973	0.640359	-2.26394	0.0235779	0.0665902
ENSG00000228672.3	PROB1	74.8653	-1.44912	0.32328	-4.48255	7.38e-06	4.21e-05
ENSG00000213450.4	VDAC1P7	29.6613	-1.44778	0.435608	-3.32359	0.000888679	0.00359573
ENSG00000157613.10	CREB3L1	149.813	-1.44708	0.230463	-6.27901	3.41e-10	3.2e-09
ENSG00000172985.10	SH3RF3	566.213	-1.44688	0.11335	-12.7647	2.58e-37	9.81e-36
ENSG00000137434.11	C6orf52	8.59971	-1.44596	0.788581	-1.83363	0.0667097	0.15966
ENSG00000140044.12	JDP2	321.406	-1.44581	0.154208	-9.3757	6.87e-21	1.33e-19
ENSG00000143498.17	TAF1A	244.804	-1.44549	0.159113	-9.08465	1.04e-19	1.89e-18
ENSG00000196924.14	FLNA	24827.9	-1.44538	0.0682609	-21.1743	1.65e-99	2.44e-97
ENSG00000224155.2	RP11-700P18.2	13.2473	-1.44514	0.681828	-2.1195	0.034048	0.09133
ENSG00000253741.1	CTD-2292P10.4	11.9484	-1.44365	0.673639	-2.14307	0.0321076	0.086929
ENSG00000164318.17	EGFLAM	139.516	-1.44307	0.21525	-6.70416	2.03e-11	2.11e-10
ENSG00000101871.14	MID1	342.399	-1.44262	0.156887	-9.1953	3.74e-20	6.96e-19
ENSG00000161638.10	ITGA5	1603.99	-1.44258	0.0880946	-16.3754	2.87e-60	2.03e-58
ENSG00000123983.13	ACSL3	2047.68	-1.44233	0.081442	-17.71	3.51e-70	3.14e-68
ENSG00000198682.12	PAPSS2	1427.76	-1.44228	0.104169	-13.8456	1.35e-43	6.28e-42
ENSG00000200534.1	SNORA33	8.16238	-1.44155	0.830635	-1.73548	0.0826551	0.190188
ENSG00000010704.18	HFE	140.503	-1.4415	0.207674	-6.94119	3.89e-12	4.3e-11
ENSG00000115993.12	TRAK2	564.513	-1.44043	0.126698	-11.369	5.97e-30	1.73e-28
ENSG00000106351.12	AGFG2	211.986	-1.43948	0.166563	-8.64226	5.51e-18	9.08e-17
ENSG00000111801.15	BTN3A3	146.588	-1.43904	0.24237	-5.93736	2.9e-09	2.49e-08
ENSG00000114353.16	GNAI2	2262.96	-1.43882	0.0967051	-14.8784	4.55e-50	2.55e-48
ENSG00000240793.1	UBA52P8	6.8964	-1.43785	0.961462	-1.49548	0.134789	0.280555
ENSG00000258373.1	SLC25A3P2	28.697	-1.43649	0.496899	-2.89091	0.00384131	0.0135174
ENSG00000027075.13	PRKCH	150.157	-1.43581	0.212185	-6.76678	1.32e-11	1.39e-10
ENSG00000206903.1	SNORA24	38.017	-1.43399	0.386268	-3.71243	0.00020528	0.000933094
ENSG00000217897.2	HSPE1P8	7.06715	-1.43364	0.881844	-1.62573	0.104006	0.228918
ENSG00000171208.9	NETO2	752.791	-1.43236	0.10431	-13.7318	6.55e-43	3e-41
ENSG00000258450.1	RP11-649E7.7	8.80294	-1.43148	0.801059	-1.78699	0.0739393	0.173901
ENSG00000115963.13	RND3	2585.03	-1.43136	0.106953	-13.3831	7.59e-41	3.32e-39
ENSG00000104369.4	JPH1	483.644	-1.43097	0.122191	-11.7109	1.12e-31	3.5e-30
ENSG00000273007.1	RP11-170N16.3	101.161	-1.42861	0.294901	-4.84438	1.27e-06	8.04e-06
ENSG00000280374.1	RP11-337N6.3	10.5609	-1.42719	0.807933	-1.76647	0.0773165	0.180023
ENSG00000276045.2	ORAI1	345.238	-1.42643	0.141633	-10.0713	7.4e-24	1.67e-22
ENSG00000230581.2	ACTG1P14	78.165	-1.42603	0.261345	-5.45653	4.86e-08	3.66e-07
ENSG00000205683.11	DPF3	31.418	-1.42586	0.415438	-3.43218	0.000598759	0.00250627
ENSG00000187123.14	LYPD6	262.76	-1.42407	0.161351	-8.82595	1.09e-18	1.87e-17
ENSG00000272695.1	GAS6-AS2	55.5389	-1.42394	0.31818	-4.47527	7.63e-06	4.35e-05
ENSG00000251234.1	PSMA2P2	6.79387	-1.422	0.946194	-1.50286	0.132874	0.277533
ENSG00000188765.7	TMSB4XP2	54.7562	-1.42166	0.365387	-3.89084	9.99e-05	0.000479562
ENSG00000186854.10	TRABD2A	545.193	-1.42165	0.114093	-12.4605	1.23e-35	4.38e-34
ENSG00000251359.4	WWC2-AS2	6.85134	-1.42131	0.85291	-1.66643	0.0956284	0.21407
ENSG00000136643.11	RPS6KC1	663.063	-1.42014	0.119208	-11.9131	1.01e-32	3.27e-31
ENSG00000170006.11	TMEM154	270.086	-1.41837	0.159908	-8.86996	7.32e-19	1.27e-17
ENSG00000117724.12	CENPF	6104.63	-1.41769	0.0676308	-20.9622	1.45e-97	2.09e-95
ENSG00000183155.4	RABIF	156.066	-1.4173	0.186804	-7.58707	3.27e-14	4.25e-13
ENSG00000255642.1	PABPC1P4	493.549	-1.41677	0.12977	-10.9175	9.5e-28	2.51e-26
ENSG00000163071.10	SPATA18	233.036	-1.41647	0.192377	-7.36302	1.8e-13	2.22e-12
ENSG00000126458.3	RRAS	205.688	-1.41599	0.212706	-6.65703	2.79e-11	2.87e-10
ENSG00000114270.16	COL7A1	42.829	-1.41576	0.398015	-3.55705	0.000375037	0.00162218
ENSG00000205220.11	PSMB10	52.7515	-1.41548	0.351212	-4.03027	5.57e-05	0.000279172
ENSG00000259933.6	RP11-304L19.1	6.90538	-1.41454	1.0261	-1.37856	0.16803	0.330574
ENSG00000213763.4	ACTBP2	666.39	-1.41438	0.118936	-11.8919	1.3e-32	4.2e-31
ENSG00000218459.1	RPS27P15	10.6963	-1.41323	0.778725	-1.8148	0.0695544	0.165281
ENSG00000073060.15	SCARB1	1882.6	-1.41195	0.0833941	-16.9311	2.65e-64	2.1e-62
ENSG00000236739.3	CLIC4P1	59.0159	-1.41032	0.330223	-4.27081	1.95e-05	0.000104559
ENSG00000258096.1	RP11-474P2.2	7.86692	-1.41007	0.870052	-1.62068	0.105087	0.23064
ENSG00000181885.18	CLDN7	41.6746	-1.40975	0.389955	-3.61517	0.000300156	0.00132317
ENSG00000067798.14	NAV3	339.555	-1.40886	0.146219	-9.63529	5.67e-22	1.16e-20
ENSG00000235805.1	SOCS5P3	9.93388	-1.40765	0.768394	-1.83193	0.0669615	0.160194
ENSG00000258021.1	RP11-1100L3.4	21.5107	-1.40726	0.507324	-2.77389	0.00553897	0.0187753
ENSG00000155016.17	CYP2U1	251.654	-1.40499	0.175435	-8.0086	1.16e-15	1.67e-14
ENSG00000267156.1	TPMTP1	18.0543	-1.4047	0.60677	-2.31504	0.0206106	0.0592928
ENSG00000227001.3	NBPF2P	35.0644	-1.40403	0.409023	-3.43263	0.000597755	0.00250281
ENSG00000184860.9	SDR42E1	84.7917	-1.40304	0.262606	-5.34275	9.15e-08	6.67e-07
ENSG00000171174.13	RBKS	35.5498	-1.40237	0.41594	-3.37156	0.000747441	0.00306793
ENSG00000091436.16	AC013461.1	1814.01	-1.40208	0.0841708	-16.6576	2.67e-62	2e-60
ENSG00000099250.17	NRP1	959.209	-1.40188	0.106009	-13.2242	6.36e-40	2.67e-38
ENSG00000151846.8	PABPC3	1412.95	-1.40167	0.0942931	-14.865	5.56e-50	3.1e-48
ENSG00000152223.12	EPG5	1692.37	-1.40045	0.093457	-14.985	9.21e-51	5.3e-49
ENSG00000101849.15	TBL1X	591.979	-1.39904	0.114992	-12.1664	4.69e-34	1.59e-32
ENSG00000002586.18	CD99	557.453	-1.39901	0.130979	-10.6812	1.25e-26	3.12e-25
ENSG00000154608.14	CEP170P1	541.111	-1.39828	0.127501	-10.9668	5.52e-28	1.48e-26
ENSG00000151914.19	DST	8212.04	-1.39695	0.0633186	-22.0622	7.29e-108	1.27e-105
ENSG00000103381.11	CPPED1	644.413	-1.39652	0.113015	-12.357	4.47e-35	1.57e-33
ENSG00000113070.7	HBEGF	178.364	-1.39613	0.199557	-6.99614	2.63e-12	2.95e-11
ENSG00000142669.14	SH3BGRL3	669.833	-1.39601	0.119164	-11.7151	1.07e-31	3.34e-30
ENSG00000073712.14	FERMT2	1219	-1.39581	0.0920071	-15.1707	5.53e-52	3.24e-50
ENSG00000118515.11	SGK1	796.576	-1.39576	0.101906	-13.6966	1.06e-42	4.86e-41
ENSG00000199753.1	SNORD104	13.8773	-1.39516	0.604765	-2.30694	0.021058	0.0604072
ENSG00000254780.1	RP11-793I11.1	10.1295	-1.39508	0.730815	-1.90893	0.0562707	0.138783
ENSG00000225108.1	ZBTB45P1	7.88009	-1.39429	0.786142	-1.77358	0.0761321	0.17784
ENSG00000254702.1	CTD-2651C21.3	5.12698	-1.39363	0.97913	-1.42333	0.15464	0.311308
ENSG00000241473.1	RP11-259P15.3	111.852	-1.39203	0.228105	-6.10258	1.04e-09	9.37e-09
ENSG00000253555.1	RP11-16E18.1	33.1464	-1.392	0.403031	-3.45384	0.000552669	0.00232754
ENSG00000127528.5	KLF2	72.5328	-1.39142	0.310647	-4.47909	7.5e-06	4.27e-05
ENSG00000277744.1	CTC-435M10.12	7.39527	-1.39128	0.999428	-1.39208	0.163899	0.324717
ENSG00000252213.1	SNORA74	196.62	-1.39123	0.515199	-2.70038	0.00692598	0.0228922
ENSG00000250956.1	CTB-88F18.3	9.86391	-1.39008	0.809825	-1.71652	0.0860671	0.196544
ENSG00000150991.14	UBC	20376	-1.38973	0.0700712	-19.8331	1.54e-87	1.87e-85
ENSG00000142794.18	NBPF3	541.789	-1.38949	0.118457	-11.73	8.95e-32	2.8e-30
ENSG00000163545.8	NUAK2	407.579	-1.38924	0.155826	-8.91533	4.86e-19	8.52e-18
ENSG00000185130.5	HIST1H2BL	262.047	-1.38877	0.161213	-8.6145	7.02e-18	1.16e-16
ENSG00000160256.12	FAM207A	197.421	-1.38835	0.178715	-7.76848	7.94e-15	1.08e-13
ENSG00000197461.13	PDGFA	575.472	-1.38833	0.122488	-11.3344	8.86e-30	2.55e-28
ENSG00000275597.1	RP11-1378G18.1	14.0699	-1.3874	0.596964	-2.32409	0.0201207	0.0580378
ENSG00000248098.11	BCKDHA	31.6756	-1.38715	0.448733	-3.09125	0.00199313	0.00747548
ENSG00000184371.13	CSF1	470.644	-1.38601	0.13167	-10.5264	6.53e-26	1.6e-24
ENSG00000231087.2	FDPSP7	19.7892	-1.38526	0.579839	-2.38905	0.0168919	0.0499847
ENSG00000250920.1	RP11-297P16.4	7.54894	-1.38504	0.979227	-1.41443	0.157237	0.315061
ENSG00000259299.1	RP11-37J13.1	19.9061	-1.38503	0.5307	-2.60983	0.00905884	0.029111
ENSG00000235159.1	RP6-109B7.4	7.20482	-1.38434	0.879276	-1.5744	0.115394	0.248265
ENSG00000198868.3	MTND4LP30	30.7032	-1.38373	0.425189	-3.25439	0.00113637	0.00449265
ENSG00000162889.10	MAPKAPK2	1478.6	-1.38316	0.0946723	-14.61	2.43e-48	1.29e-46
ENSG00000076344.15	RGS11	5.97612	-1.38298	1.21752	-1.13589	0.256001	0.447321
ENSG00000226148.1	SLC25A39P1	38.6671	-1.38209	0.428968	-3.22189	0.00127349	0.00497534
ENSG00000067167.7	TRAM1	4142.14	-1.38133	0.0790692	-17.4699	2.43e-68	2.05e-66
ENSG00000159840.15	ZYX	2069.85	-1.38086	0.0935954	-14.7535	2.92e-49	1.59e-47
ENSG00000219951.4	RP11-378G13.2	77.8274	-1.38075	0.298071	-4.63231	3.62e-06	2.16e-05
ENSG00000241159.3	RN7SL160P	22.1552	-1.37969	0.52055	-2.65044	0.00803877	0.0261616
ENSG00000131374.14	TBC1D5	967.37	-1.37922	0.111656	-12.3525	4.72e-35	1.66e-33
ENSG00000258204.1	RP11-90E9.1	10.0047	-1.37855	0.757416	-1.82007	0.0687485	0.163739
ENSG00000135723.13	FHOD1	498.981	-1.37769	0.121535	-11.3357	8.73e-30	2.51e-28
ENSG00000100106.19	TRIOBP	654.58	-1.37747	0.112748	-12.2172	2.52e-34	8.63e-33
ENSG00000174332.5	GLIS1	27.1891	-1.37617	0.444414	-3.09659	0.0019576	0.00735696
ENSG00000233994.2	GDI2P2	74.0366	-1.37599	0.284104	-4.84327	1.28e-06	8.08e-06
ENSG00000263528.7	IKBKE	83.5272	-1.37515	0.280409	-4.90406	9.39e-07	6.06e-06
ENSG00000073792.15	IGF2BP2	2531.14	-1.37492	0.0815484	-16.8601	8.84e-64	6.97e-62
ENSG00000264570.1	SNX19P3	9.94805	-1.3745	0.742921	-1.85013	0.064295	0.154815
ENSG00000176697.18	BDNF	415.868	-1.37432	0.130935	-10.4962	9e-26	2.18e-24
ENSG00000254879.1	PTPRJ-AS1	4.94306	-1.37375	1.27779	-1.0751	0.28233	0.478559
ENSG00000166128.12	RAB8B	704.764	-1.37342	0.113159	-12.1371	6.72e-34	2.27e-32
ENSG00000241749.4	RPSAP52	59.0921	-1.37332	0.319167	-4.30282	1.69e-05	9.16e-05
ENSG00000283132.1	RP4-614C10.3	8.20407	-1.373	0.858442	-1.59941	0.109729	0.238649
ENSG00000122966.14	CIT	2145.42	-1.372	0.081719	-16.7892	2.93e-63	2.26e-61
ENSG00000184188.6	CTC-512J14.7	40.9986	-1.37019	0.345486	-3.96599	7.31e-05	0.000358214
ENSG00000161265.14	U2AF1L4	267.199	-1.3699	0.17989	-7.6152	2.63e-14	3.46e-13
ENSG00000277914.1	DDX6P2	15.9069	-1.36963	0.642152	-2.13287	0.0329354	0.0888452
ENSG00000020577.13	SAMD4A	1056.72	-1.36892	0.0970748	-14.1017	3.71e-45	1.79e-43
ENSG00000225603.3	RP11-325P15.1	51.3929	-1.36878	0.345688	-3.95957	7.51e-05	0.000367088
ENSG00000280055.1	TMEM75	161.635	-1.36814	0.210753	-6.49169	8.49e-11	8.4e-10
ENSG00000213214.4	ARHGEF35	44.1675	-1.368	0.369441	-3.70288	0.000213164	0.000965188
ENSG00000109906.13	ZBTB16	195.452	-1.36648	0.170987	-7.99174	1.33e-15	1.9e-14
ENSG00000271075.1	RP11-589M4.4	11.7849	-1.36647	0.759853	-1.79834	0.0721232	0.170399
ENSG00000100889.11	PCK2	601.857	-1.3656	0.128537	-10.6242	2.3e-26	5.71e-25
ENSG00000263989.2	RN7SL615P	11.1692	-1.36544	0.806343	-1.69337	0.0903848	0.20471
ENSG00000196139.13	AKR1C3	41.8172	-1.36493	0.423166	-3.22553	0.00125742	0.00491936
ENSG00000171451.13	DSEL	288.627	-1.36488	0.152761	-8.9347	4.08e-19	7.18e-18
ENSG00000134242.15	PTPN22	11.9158	-1.36377	0.705947	-1.93183	0.0533798	0.132841
ENSG00000203724.10	C1orf53	14.1014	-1.36267	0.64	-2.12917	0.0332401	0.0895301
ENSG00000106266.9	SNX8	590.792	-1.36213	0.113357	-12.0163	2.92e-33	9.62e-32
ENSG00000233579.1	KRT8P15	23.2084	-1.362	0.461969	-2.94824	0.00319586	0.0114513
ENSG00000254649.1	RP11-452H21.2	8.22468	-1.36199	0.916674	-1.48579	0.137333	0.284483
ENSG00000248696.1	AC011406.2	8.2894	-1.36194	0.910863	-1.49522	0.134857	0.280633
ENSG00000263155.5	MYZAP	6.23645	-1.3617	0.982451	-1.38602	0.165741	0.32717
ENSG00000134852.14	CLOCK	1325.34	-1.36168	0.102693	-13.2597	3.97e-40	1.69e-38
ENSG00000255014.1	ARL6IP1P3	12.9302	-1.36156	0.713061	-1.90946	0.0562032	0.13866
ENSG00000113645.14	WWC1	741.217	-1.36129	0.110538	-12.3152	7.51e-35	2.61e-33
ENSG00000268942.2	CKS1BP3	24.868	-1.36097	0.457885	-2.9723	0.00295575	0.0106693
ENSG00000113369.8	ARRDC3	147.078	-1.36044	0.206083	-6.6014	4.07e-11	4.15e-10
ENSG00000145335.15	SNCA	191.061	-1.36012	0.194133	-7.00611	2.45e-12	2.75e-11
ENSG00000251095.6	RP11-115D19.1	165.466	-1.35984	0.230142	-5.90868	3.45e-09	2.94e-08
ENSG00000139211.6	AMIGO2	170.5	-1.35917	0.177921	-7.6392	2.19e-14	2.89e-13
ENSG00000143776.18	CDC42BPA	2682.86	-1.35915	0.0834096	-16.2949	1.07e-59	7.51e-58
ENSG00000057608.16	GDI2	3100.88	-1.35857	0.0767655	-17.6976	4.37e-70	3.9e-68
ENSG00000232672.1	ACTG1P21	23.4532	-1.35831	0.466079	-2.91434	0.00356439	0.0126218
ENSG00000202357.1	Y_RNA	22.794	-1.35718	0.461958	-2.93789	0.00330456	0.0117982
ENSG00000214552.4	COPS8P2	21.9384	-1.35706	0.501926	-2.70371	0.00685699	0.0226961
ENSG00000072786.12	STK10	935.324	-1.35626	0.108141	-12.5416	4.42e-36	1.61e-34
ENSG00000171724.2	VAT1L	33.1421	-1.35623	0.45353	-2.99038	0.0027863	0.010103
ENSG00000100644.16	HIF1A	2226.91	-1.3554	0.0771988	-17.5572	5.24e-69	4.52e-67
ENSG00000219930.4	GAPDHP67	12.3819	-1.35534	0.680086	-1.99289	0.0462731	0.118132
ENSG00000254181.1	SLC25A51P3	6.31455	-1.35524	1.0117	-1.33957	0.180384	0.348185
ENSG00000229989.3	MIR181A1HG	72.0626	-1.35507	0.282984	-4.78851	1.68e-06	1.05e-05
ENSG00000168310.10	IRF2	176.002	-1.35491	0.195446	-6.9324	4.14e-12	4.56e-11
ENSG00000255437.1	RP11-510I21.1	6.15442	-1.35438	0.982279	-1.37881	0.167952	0.330444
ENSG00000133816.13	MICAL2	1282.96	-1.35428	0.0951374	-14.235	5.55e-46	2.76e-44
ENSG00000153815.16	CMIP	825.842	-1.35377	0.109781	-12.3315	6.13e-35	2.14e-33
ENSG00000157193.15	LRP8	811.052	-1.35309	0.109912	-12.3106	7.94e-35	2.75e-33
ENSG00000117650.12	NEK2	686.079	-1.35278	0.120683	-11.2094	3.67e-29	1.02e-27
ENSG00000164342.12	TLR3	110.724	-1.35269	0.249132	-5.42962	5.65e-08	4.22e-07
ENSG00000143479.15	DYRK3	523.163	-1.35232	0.137279	-9.85092	6.79e-23	1.46e-21
ENSG00000118680.12	MYL12B	2013.12	-1.3523	0.0955402	-14.1543	1.76e-45	8.58e-44
ENSG00000213431.4	RP11-301G23.1	7.44454	-1.3517	1.1154	-1.21185	0.225568	0.409662
ENSG00000224365.1	RP11-252P18.1	7.80401	-1.34876	0.793279	-1.70024	0.0890857	0.20219
ENSG00000283117.1	CTD-2060L22.1	5.55642	-1.34829	0.991054	-1.36047	0.173683	0.338712
ENSG00000178826.10	TMEM139	18.5484	-1.34822	0.575033	-2.34459	0.0190481	0.0553238
ENSG00000169504.14	CLIC4	4671.29	-1.34765	0.0713712	-18.8822	1.6e-79	1.71e-77
ENSG00000070756.14	PABPC1	17242.3	-1.34763	0.0670946	-20.0855	9.89e-90	1.26e-87
ENSG00000143819.12	EPHX1	597.875	-1.34725	0.122291	-11.0168	3.17e-28	8.58e-27
ENSG00000170153.10	RNF150	456.579	-1.34672	0.135346	-9.95018	2.52e-23	5.52e-22
ENSG00000273017.1	AP000240.9	6.06106	-1.34512	0.875463	-1.53646	0.124424	0.263166
ENSG00000111012.9	CYP27B1	121.155	-1.34439	0.2828	-4.75385	2e-06	1.23e-05
ENSG00000011426.10	ANLN	4251.32	-1.3437	0.0750794	-17.897	1.24e-71	1.13e-69
ENSG00000229715.4	EEF1DP3	47.7042	-1.34279	0.364338	-3.68556	0.000228203	0.00102914
ENSG00000264343.5	NOTCH2NL	793.449	-1.3425	0.115799	-11.5934	4.45e-31	1.35e-29
ENSG00000135596.17	MICAL1	359.315	-1.34236	0.145039	-9.25518	2.14e-20	4.03e-19
ENSG00000254332.1	GS1-44D20.1	187.724	-1.34221	0.192264	-6.98105	2.93e-12	3.27e-11
ENSG00000069122.18	ADGRF5	8.30966	-1.34214	0.931366	-1.44104	0.149573	0.303493
ENSG00000023909.9	GCLM	837.509	-1.34152	0.11183	-11.9961	3.72e-33	1.22e-31
ENSG00000244703.3	CD46P1	48.3704	-1.34056	0.366219	-3.66055	0.000251675	0.00112687
ENSG00000236060.2	HSPB1P1	76.2316	-1.34004	0.280794	-4.77234	1.82e-06	1.13e-05
ENSG00000131188.11	PRR7	152.75	-1.33979	0.218341	-6.13619	8.45e-10	7.64e-09
ENSG00000164294.13	GPX8	819.929	-1.33746	0.108815	-12.2912	1.01e-34	3.48e-33
ENSG00000213179.4	RPL17P41	6.69498	-1.33624	0.959786	-1.39223	0.163853	0.324673
ENSG00000128595.16	CALU	6245.24	-1.33548	0.076547	-17.4466	3.65e-68	3.07e-66
ENSG00000155070.8	UNC93B2	5.09328	-1.33515	1.15127	-1.15972	0.246164	0.435133
ENSG00000162888.4	C1orf147	7.03814	-1.33503	0.931338	-1.43345	0.151728	0.306958
ENSG00000222112.1	RN7SKP16	9.19792	-1.33466	0.769456	-1.73456	0.0828192	0.190488
ENSG00000234564.1	HSPA8P20	6.30311	-1.33463	0.852159	-1.56617	0.117308	0.251556
ENSG00000187838.16	TMEM256-PLSCR3	15.991	-1.33383	0.621404	-2.14647	0.0318354	0.0863417
ENSG00000258613.1	RPL21P7	10.1375	-1.33297	0.749876	-1.77759	0.0754712	0.176633
ENSG00000276809.1	RP11-10E18.7	16.7966	-1.3315	0.694489	-1.91724	0.0552074	0.13676
ENSG00000233402.1	TARDBPP1	7.11409	-1.33091	0.89338	-1.48975	0.136291	0.282885
ENSG00000213005.3	PTTG3P	15.5005	-1.33081	0.60081	-2.21502	0.0267586	0.0742765
ENSG00000155189.11	AGPAT5	671.952	-1.32917	0.110411	-12.0384	2.23e-33	7.38e-32
ENSG00000184378.2	ACTRT3	30.5189	-1.32878	0.404019	-3.28892	0.00100574	0.00402081
ENSG00000204520.12	MICA	341.709	-1.3287	0.162609	-8.17118	3.05e-16	4.54e-15
ENSG00000272574.1	RP11-359K18.4	59.2184	-1.32859	0.371437	-3.5769	0.000347693	0.00151321
ENSG00000283235.1	RP11-844P9.6	13.1097	-1.32823	0.715218	-1.85709	0.063298	0.152886
ENSG00000174226.8	SNX31	50.3498	-1.32755	0.719567	-1.84493	0.0650473	0.156306
ENSG00000105810.9	CDK6	3215.68	-1.32721	0.0736909	-18.0106	1.61e-72	1.5e-70
ENSG00000236683.3	HMGA1P1	116.316	-1.32699	0.23703	-5.59838	2.16e-08	1.7e-07
ENSG00000177706.8	FAM20C	224.74	-1.32694	0.16944	-7.83132	4.83e-15	6.66e-14
ENSG00000232177.1	MTND4P24	71.9813	-1.32478	0.306061	-4.32849	1.5e-05	8.21e-05
ENSG00000278637.1	HIST1H4A	181.35	-1.32427	0.182097	-7.27232	3.53e-13	4.28e-12
ENSG00000131187.9	F12	99.9119	-1.32383	0.251704	-5.25946	1.44e-07	1.03e-06
ENSG00000137857.17	DUOX1	96.4997	-1.3233	0.258054	-5.12798	2.93e-07	2e-06
ENSG00000065357.19	DGKA	351.42	-1.32255	0.156843	-8.4323	3.39e-17	5.36e-16
ENSG00000213786.3	NHP2P2	8.67088	-1.32188	0.816247	-1.61946	0.105349	0.231106
ENSG00000114850.6	SSR3	5014.67	-1.32153	0.0830062	-15.9209	4.54e-57	2.99e-55
ENSG00000117394.19	SLC2A1	862.528	-1.32146	0.0983167	-13.4409	3.48e-41	1.54e-39
ENSG00000262903.1	RP11-235E17.6	8.12299	-1.32092	0.84868	-1.55645	0.119602	0.255231
ENSG00000186575.17	NF2	4263.25	-1.32065	0.0903815	-14.612	2.36e-48	1.26e-46
ENSG00000271327.1	RP11-1109F11.3	9.08208	-1.32008	0.772218	-1.70947	0.0873638	0.198884
ENSG00000243951.1	RN7SL308P	34.3848	-1.31859	0.451011	-2.92363	0.00345974	0.0122868
ENSG00000138594.13	TMOD3	1899.65	-1.31831	0.0830469	-15.8743	9.54e-57	6.25e-55
ENSG00000157617.16	C2CD2	830.872	-1.3171	0.110944	-11.8718	1.66e-32	5.31e-31
ENSG00000226389.3	RP11-507K13.4	15.1118	-1.31628	0.626993	-2.09936	0.0357851	0.0951642
ENSG00000258640.3	RPL21P5	6.83256	-1.31584	0.929764	-1.41524	0.156997	0.314833
ENSG00000232199.1	RPL3P8	20.8089	-1.31576	0.526337	-2.49984	0.0124249	0.0383555
ENSG00000246705.4	H2AFJ	107.254	-1.31453	0.245323	-5.35837	8.4e-08	6.15e-07
ENSG00000124839.12	RAB17	8.47238	-1.31444	0.792078	-1.65948	0.0970195	0.216422
ENSG00000224011.1	AC111155.1	33.5431	-1.31435	0.437555	-3.00386	0.00266578	0.00971231
ENSG00000174137.12	FAM53A	42.548	-1.31402	0.369077	-3.56028	0.000370461	0.00160362
ENSG00000244198.5	RP4-545C24.1	32.9826	-1.31388	0.411322	-3.19429	0.00140176	0.00542747
ENSG00000130021.13	PUDP	216.366	-1.31294	0.162236	-8.09278	5.83e-16	8.53e-15
ENSG00000280544.1	AC107081.1	11.5833	-1.31285	0.777979	-1.68751	0.0915048	0.206698
ENSG00000015475.18	BID	452.913	-1.31231	0.129706	-10.1176	4.62e-24	1.06e-22
ENSG00000145817.16	YIPF5	1326.52	-1.31131	0.0875827	-14.9723	1.11e-50	6.38e-49
ENSG00000079841.18	RIMS1	198.751	-1.30974	0.250445	-5.22964	1.7e-07	1.2e-06
ENSG00000112183.14	RBM24	76.1179	-1.30947	0.302347	-4.331	1.48e-05	8.13e-05
ENSG00000167397.14	VKORC1	155.301	-1.30919	0.209586	-6.24653	4.2e-10	3.92e-09
ENSG00000166548.15	TK2	316.193	-1.30893	0.163827	-7.98973	1.35e-15	1.93e-14
ENSG00000213190.3	MLLT11	575.884	-1.30865	0.120509	-10.8594	1.8e-27	4.68e-26
ENSG00000003436.14	TFPI	1864.83	-1.30857	0.0897225	-14.5846	3.52e-48	1.87e-46
ENSG00000267904.1	CTC-429P9.5	25.8447	-1.30744	0.466478	-2.80278	0.00506638	0.0173278
ENSG00000215351.3	PPIAP1	11.1461	-1.30706	0.704319	-1.85578	0.0634845	0.153191
ENSG00000151748.14	SAV1	866.607	-1.30694	0.103659	-12.6082	1.9e-36	7.01e-35
ENSG00000263513.5	FAM72C	147.512	-1.30684	0.222111	-5.88373	4.01e-09	3.4e-08
ENSG00000219274.1	RPS20P2	18.5162	-1.3068	0.569642	-2.29407	0.0217862	0.0622612
ENSG00000185220.11	PGBD2	80.9561	-1.30674	0.269258	-4.85312	1.22e-06	7.72e-06
ENSG00000169764.14	UGP2	1026.96	-1.30607	0.102051	-12.7982	1.68e-37	6.42e-36
ENSG00000232883.1	RP11-302I18.1	138.389	-1.30568	0.222316	-5.87309	4.28e-09	3.62e-08
ENSG00000008256.15	CYTH3	1228.83	-1.30562	0.103049	-12.6699	8.69e-37	3.25e-35
ENSG00000273136.6	NBPF26	579.618	-1.30521	0.133871	-9.74975	1.85e-22	3.89e-21
ENSG00000126226.21	PCID2	1070.09	-1.30495	0.104158	-12.5286	5.21e-36	1.89e-34
ENSG00000214484.3	RPSAP28	6.33277	-1.30484	0.931021	-1.40152	0.16106	0.320582
ENSG00000183791.4	TCEB3C	8.0642	-1.30402	0.856708	-1.52212	0.127978	0.269125
ENSG00000133454.15	MYO18B	7.67007	-1.30383	1.10088	-1.18434	0.236276	0.423102
ENSG00000147459.17	DOCK5	1861.41	-1.30374	0.0930106	-14.0171	1.23e-44	5.83e-43
ENSG00000106665.15	CLIP2	758.99	-1.30289	0.128272	-10.1572	3.08e-24	7.1e-23
ENSG00000206144.5	RP11-400K9.2	14.5975	-1.30251	0.617422	-2.1096	0.034893	0.0932059
ENSG00000197385.5	ZNF860	24.4568	-1.30225	0.457854	-2.84424	0.00445176	0.0154396
ENSG00000233328.3	PFN1P1	294.015	-1.30189	0.155046	-8.39677	4.59e-17	7.2e-16
ENSG00000042832.11	TG	7.24131	-1.30183	1.03235	-1.26103	0.207299	0.385743
ENSG00000131408.13	NR1H2	482.257	-1.30167	0.143324	-9.08198	1.07e-19	1.94e-18
ENSG00000090615.13	GOLGA3	2856.41	-1.30117	0.0876338	-14.8478	7.19e-50	3.99e-48
ENSG00000233270.1	SNRPEP4	30.1259	-1.30065	0.409599	-3.17542	0.00149618	0.00575957
ENSG00000078403.16	MLLT10	552.313	-1.30054	0.119795	-10.8564	1.86e-27	4.83e-26
ENSG00000143476.17	DTL	1110.23	-1.30052	0.0932519	-13.9463	3.31e-44	1.56e-42
ENSG00000135090.13	TAOK3	586.085	-1.30026	0.1213	-10.7194	8.25e-27	2.08e-25
ENSG00000182004.12	SNRPE	864.346	-1.29935	0.100069	-12.9845	1.5e-38	6e-37
ENSG00000244371.2	PFN1P8	43.2877	-1.29735	0.403757	-3.2132	0.00131266	0.00511347
ENSG00000111328.6	CDK2AP1	1002.77	-1.29709	0.105374	-12.3094	8.06e-35	2.79e-33
ENSG00000163794.6	UCN	7.8113	-1.29706	1.06918	-1.21313	0.225079	0.409143
ENSG00000198113.2	TOR4A	633.063	-1.29624	0.115441	-11.2286	2.95e-29	8.28e-28
ENSG00000145908.12	ZNF300	227.228	-1.29618	0.165953	-7.81057	5.69e-15	7.82e-14
ENSG00000170044.8	ZPLD1	6.49047	-1.296	1.09652	-1.18192	0.237237	0.424341
ENSG00000213237.4	AC008155.1	17.8299	-1.29583	0.556341	-2.32919	0.0198488	0.0573418
ENSG00000218187.2	RP11-325O24.1	7.05012	-1.29432	0.955048	-1.35525	0.175339	0.340926
ENSG00000242252.1	BGLAP	7.4486	-1.29385	1.03618	-1.24867	0.211785	0.391888
ENSG00000148444.15	COMMD3	112.222	-1.29345	0.245175	-5.27561	1.32e-07	9.44e-07
ENSG00000225300.1	RP11-1086F11.1	59.5	-1.29294	0.361645	-3.57517	0.000350001	0.00152231
ENSG00000091073.19	DTX2	318.615	-1.29118	0.154311	-8.36735	5.89e-17	9.16e-16
ENSG00000275014.1	RN7SL166P	25.7606	-1.29044	0.500787	-2.57682	0.00997139	0.0316529
ENSG00000201498.1	Y_RNA	6.05051	-1.28877	0.919601	-1.40144	0.161081	0.320602
ENSG00000235619.1	RPL36AP33	7.8976	-1.28862	0.838117	-1.53751	0.124167	0.262781
ENSG00000167460.14	TPM4	3704.47	-1.28696	0.0799385	-16.0994	2.57e-58	1.74e-56
ENSG00000117280.12	RAB29	454.613	-1.28585	0.126622	-10.155	3.15e-24	7.25e-23
ENSG00000229294.1	RP5-1044H5.1	6.61113	-1.28498	1.01708	-1.2634	0.206445	0.384639
ENSG00000128298.16	BAIAP2L2	34.9433	-1.28455	0.387021	-3.31906	0.000903199	0.00364714
ENSG00000120437.8	ACAT2	695.254	-1.28324	0.113156	-11.3405	8.26e-30	2.38e-28
ENSG00000109220.10	CHIC2	234.986	-1.28282	0.167013	-7.68096	1.58e-14	2.11e-13
ENSG00000188219.14	POTEE	199.032	-1.28256	0.196127	-6.53944	6.18e-11	6.17e-10
ENSG00000106397.11	PLOD3	1098.38	-1.2823	0.103362	-12.4058	2.43e-35	8.61e-34
ENSG00000121900.18	TMEM54	168.202	-1.28194	0.198481	-6.45876	1.06e-10	1.04e-09
ENSG00000233006.6	AC034220.3	99.481	-1.28166	0.245457	-5.22152	1.77e-07	1.25e-06
ENSG00000109099.13	PMP22	550.05	-1.28128	0.119842	-10.6914	1.12e-26	2.8e-25
ENSG00000174529.7	TMEM81	79.9748	-1.28118	0.309263	-4.14269	3.43e-05	0.000177955
ENSG00000180777.13	ANKRD30B	45.5385	-1.28082	0.377763	-3.39053	0.000697569	0.00288172
ENSG00000067057.16	PFKP	2959.45	-1.27986	0.0794554	-16.1079	2.24e-58	1.52e-56
ENSG00000261468.1	RP11-1024P17.1	12.3594	-1.27961	0.628693	-2.03535	0.0418152	0.108514
ENSG00000013364.18	MVP	622.097	-1.27862	0.122048	-10.4764	1.11e-25	2.67e-24
ENSG00000232676.1	ADH5P2	19.6275	-1.27857	0.532082	-2.40296	0.016263	0.0484395
ENSG00000128283.6	CDC42EP1	925.731	-1.27822	0.100381	-12.7336	3.84e-37	1.45e-35
ENSG00000102981.9	PARD6A	19.64	-1.27808	0.527235	-2.42411	0.0153459	0.04605
ENSG00000242066.3	RN7SL214P	5.08862	-1.27767	1.09553	-1.16626	0.24351	0.431634
ENSG00000224167.1	RP3-522D1.1	8.54739	-1.27757	0.761138	-1.67851	0.0932484	0.209811
ENSG00000257732.1	RP11-818F20.5	6.52902	-1.27714	1.02499	-1.246	0.212763	0.393104
ENSG00000160310.16	PRMT2	512.19	-1.27674	0.118536	-10.7709	4.72e-27	1.2e-25
ENSG00000243635.1	RP11-281P11.1	18.9732	-1.27631	0.524115	-2.43518	0.0148846	0.0448611
ENSG00000232015.2	HSPE1P25	28.3707	-1.27444	0.433942	-2.93689	0.0033152	0.0118307
ENSG00000235912.1	RP1-159A19.3	13.5063	-1.27438	0.629952	-2.02298	0.0430757	0.111139
ENSG00000169100.13	SLC25A6	1713.04	-1.27399	0.0950841	-13.3986	6.16e-41	2.7e-39
ENSG00000106635.7	BCL7B	349.691	-1.27358	0.138242	-9.21268	3.18e-20	5.94e-19
ENSG00000253227.1	RP11-383J24.1	7.27981	-1.27342	0.964503	-1.32029	0.186739	0.357379
ENSG00000279265.1	AC000123.3	16.8673	-1.27333	0.612161	-2.08006	0.0375202	0.0992429
ENSG00000244060.2	RPS2P41	7.45511	-1.27282	0.95658	-1.33059	0.183323	0.352408
ENSG00000256108.1	RP13-672B3.5	7.72669	-1.27241	0.856178	-1.48615	0.137238	0.284349
ENSG00000231707.4	PABPC1P1	121.48	-1.27238	0.229069	-5.55457	2.78e-08	2.16e-07
ENSG00000158615.8	PPP1R15B	3108.21	-1.27116	0.0772665	-16.4516	8.17e-61	5.9e-59
ENSG00000225267.1	RPL8P2	8.56917	-1.27103	0.85558	-1.48558	0.13739	0.284558
ENSG00000181722.16	ZBTB20	499.85	-1.26946	0.137401	-9.23903	2.49e-20	4.67e-19
ENSG00000134871.17	COL4A2	3596.56	-1.26928	0.080337	-15.7994	3.14e-56	2.02e-54
ENSG00000164733.20	CTSB	5074.95	-1.26857	0.0718591	-17.6536	9.55e-70	8.42e-68
ENSG00000266794.2	RN7SL7P	35.09	-1.26814	0.443292	-2.86072	0.00422673	0.0147501
ENSG00000261366.1	MANEA-AS1	9.74779	-1.26804	0.768998	-1.64895	0.0991577	0.220028
ENSG00000249068.1	CTC-287O8.1	9.18267	-1.26775	0.787613	-1.60961	0.107483	0.234751
ENSG00000241395.3	RN7SL344P	10.4387	-1.26744	0.739651	-1.71357	0.0866076	0.19755
ENSG00000102007.10	PLP2	1066.12	-1.26732	0.0999607	-12.6782	7.81e-37	2.93e-35
ENSG00000095015.5	MAP3K1	1532.99	-1.26714	0.0837836	-15.1239	1.13e-51	6.56e-50
ENSG00000240322.3	RN7SL481P	5.84039	-1.26696	0.996672	-1.27119	0.203661	0.381041
ENSG00000235374.2	SSR4P1	29.7001	-1.26669	0.417294	-3.03548	0.00240149	0.00884079
ENSG00000174791.10	RIN1	198.804	-1.26652	0.17885	-7.08144	1.43e-12	1.63e-11
ENSG00000047849.21	MAP4	5229.44	-1.26607	0.075094	-16.8598	8.89e-64	6.99e-62
ENSG00000107104.18	KANK1	727.298	-1.26601	0.107816	-11.7423	7.73e-32	2.43e-30
ENSG00000236430.1	KRT8P29	5.36616	-1.26543	0.913951	-1.38457	0.166185	0.327856
ENSG00000276393.1	RP11-106D4.3	13.1114	-1.26441	0.647381	-1.95311	0.0508064	0.127656
ENSG00000248986.1	RP11-774O3.1	12.0839	-1.26317	0.718319	-1.75851	0.0786605	0.182503
ENSG00000159921.14	GNE	659.122	-1.2626	0.109882	-11.4905	1.47e-30	4.38e-29
ENSG00000267583.5	RP11-322E11.5	11.1353	-1.26254	0.711745	-1.77387	0.0760855	0.17776
ENSG00000228960.5	OR2A9P	31.9264	-1.26208	0.411396	-3.06779	0.00215647	0.00801971
ENSG00000120526.10	NUDCD1	851.719	-1.26108	0.109942	-11.4704	1.86e-30	5.49e-29
ENSG00000214807.2	NPM1P31	31.9441	-1.26079	0.420468	-2.99853	0.00271286	0.00986977
ENSG00000124575.6	HIST1H1D	868.228	-1.25978	0.1087	-11.5895	4.66e-31	1.41e-29
ENSG00000138674.16	SEC31A	3481.2	-1.25964	0.0720076	-17.4931	1.62e-68	1.37e-66
ENSG00000074855.10	ANO8	267.016	-1.25942	0.179224	-7.02707	2.11e-12	2.38e-11
ENSG00000110090.12	CPT1A	1225.33	-1.25838	0.0977209	-12.8773	6.04e-38	2.35e-36
ENSG00000256898.1	RP11-707G14.8	24.4617	-1.25798	0.515538	-2.44014	0.0146816	0.0443441
ENSG00000261040.6	WFDC21P	30.2761	-1.25753	0.447242	-2.81175	0.00492733	0.0168912
ENSG00000076356.6	PLXNA2	1188.91	-1.25734	0.0933347	-13.4713	2.31e-41	1.02e-39
ENSG00000259767.1	RP11-90B9.2	8.45871	-1.25678	0.924742	-1.35906	0.174128	0.339368
ENSG00000124067.16	SLC12A4	1252.48	-1.25621	0.0975317	-12.88	5.83e-38	2.28e-36
ENSG00000065882.15	TBC1D1	1360.95	-1.25507	0.0880176	-14.2593	3.92e-46	1.95e-44
ENSG00000212588.1	SNORA26	23.7726	-1.25443	0.476556	-2.63229	0.00848107	0.027436
ENSG00000158715.5	SLC45A3	172.592	-1.25395	0.188737	-6.6439	3.05e-11	3.14e-10
ENSG00000070614.14	NDST1	2343.14	-1.25363	0.0874813	-14.3302	1.42e-46	7.18e-45
ENSG00000240065.7	PSMB9	72.4259	-1.25295	0.325186	-3.85302	0.000116671	0.000552546
ENSG00000162946.20	DISC1	151.922	-1.25286	0.212954	-5.88325	4.02e-09	3.41e-08
ENSG00000249641.2	HOXC13-AS	20.9501	-1.25187	0.504016	-2.48379	0.0129992	0.0399139
ENSG00000188004.9	C1orf204	6.40595	-1.25145	0.993139	-1.2601	0.207635	0.386065
ENSG00000104213.12	PDGFRL	70.6392	-1.25034	0.33598	-3.72146	0.000198078	0.000901522
ENSG00000090097.20	PCBP4	211.754	-1.25003	0.180278	-6.93387	4.09e-12	4.52e-11
ENSG00000100503.23	NIN	1773.91	-1.24989	0.0822505	-15.1961	3.75e-52	2.21e-50
ENSG00000226742.3	HSBP1L1	279.243	-1.2498	0.166016	-7.52817	5.15e-14	6.61e-13
ENSG00000228054.2	RANP5	5.45538	-1.24969	1.07787	-1.15941	0.246288	0.435269
ENSG00000099904.15	ZDHHC8	847.229	-1.24917	0.10414	-11.9951	3.77e-33	1.24e-31
ENSG00000277452.1	RN7SL473P	16.2481	-1.24902	0.572353	-2.18225	0.0290908	0.0798797
ENSG00000186352.8	ANKRD37	18.5069	-1.24864	0.54261	-2.30118	0.0213817	0.0612483
ENSG00000223749.8	MIR503HG	45.0291	-1.24755	0.36851	-3.38538	0.000710802	0.0029308
ENSG00000175701.10	LINC00116	81.2758	-1.24732	0.267222	-4.66773	3.05e-06	1.83e-05
ENSG00000163931.15	TKT	5888.62	-1.24712	0.0692718	-18.0033	1.84e-72	1.7e-70
ENSG00000240350.2	AC017002.1	16.3266	-1.24678	0.585428	-2.1297	0.0331967	0.0894231
ENSG00000241838.3	LA16c-3G11.7	99.5108	-1.24621	0.249277	-4.99927	5.75e-07	3.8e-06
ENSG00000107929.14	LARP4B	1634.22	-1.24528	0.0822086	-15.1479	7.83e-52	4.58e-50
ENSG00000175764.14	TTLL11	93.2541	-1.24335	0.250166	-4.97011	6.69e-07	4.39e-06
ENSG00000219257.2	NPM1P38	42.7239	-1.243	0.365275	-3.4029	0.000666736	0.00276735
ENSG00000182325.10	FBXL6	255.297	-1.24288	0.165456	-7.51183	5.83e-14	7.47e-13
ENSG00000106772.17	PRUNE2	125.208	-1.24262	0.275156	-4.51606	6.3e-06	3.63e-05
ENSG00000224451.2	ATP5F1P1	7.88597	-1.24226	0.877978	-1.41491	0.157095	0.314939
ENSG00000279660.1	RP11-849N15.3	13.7465	-1.2412	0.67205	-1.84689	0.0647628	0.155755
ENSG00000166401.14	SERPINB8	155.384	-1.24114	0.183722	-6.75555	1.42e-11	1.5e-10
ENSG00000168952.15	STXBP6	172.125	-1.24106	0.192589	-6.44411	1.16e-10	1.14e-09
ENSG00000259518.1	LINC01583	26.1906	-1.23972	0.592337	-2.09294	0.0363548	0.096506
ENSG00000270504.1	RP11-420L9.5	61.2468	-1.2397	0.326958	-3.79162	0.000149666	0.00069581
ENSG00000226144.2	RPS27AP3	7.23895	-1.23937	0.925733	-1.3388	0.180635	0.348598
ENSG00000099998.17	GGT5	111.863	-1.23841	0.22888	-5.41076	6.28e-08	4.67e-07
ENSG00000083290.19	ULK2	438.312	-1.23744	0.127667	-9.69273	3.24e-22	6.71e-21
ENSG00000273245.1	RP11-434P11.2	15.8887	-1.23734	0.654121	-1.89161	0.0585424	0.143301
ENSG00000238168.5	RP11-686G8.1	36.5043	-1.23668	0.448137	-2.75959	0.00578735	0.0195325
ENSG00000266402.3	SNHG25	39.1881	-1.23617	0.348823	-3.54384	0.000394344	0.0017002
ENSG00000198526.7	PABPC1P2	27.245	-1.23556	0.528828	-2.33641	0.0194702	0.0563925
ENSG00000254612.2	RP11-676M6.1	189.801	-1.23552	0.183709	-6.72539	1.75e-11	1.83e-10
ENSG00000246334.2	PRR7-AS1	44.4818	-1.23538	0.353826	-3.49149	0.000480329	0.00203967
ENSG00000275216.1	RP11-54H7.4	818.644	-1.23522	0.115135	-10.7285	7.48e-27	1.9e-25
ENSG00000128245.14	YWHAH	1285.84	-1.23507	0.0933371	-13.2323	5.71e-40	2.41e-38
ENSG00000233559.1	AC016831.7	124.855	-1.23503	0.26772	-4.61316	3.97e-06	2.35e-05
ENSG00000165621.8	OXGR1	5.42038	-1.23475	1.02132	-1.20897	0.226673	0.411244
ENSG00000199550.1	Y_RNA	4.55561	-1.23384	1.0813	-1.14107	0.253839	0.444622
ENSG00000260612.1	RP11-432I5.4	6.36985	-1.23248	0.940681	-1.3102	0.190127	0.362025
ENSG00000230449.1	RPL7P4	8.40095	-1.23166	0.785664	-1.56767	0.116959	0.250923
ENSG00000232578.4	CTC-303L1.1	6.37878	-1.23159	0.967592	-1.27284	0.203075	0.38012
ENSG00000142949.16	PTPRF	7472.84	-1.23139	0.0793211	-15.5241	2.38e-54	1.47e-52
ENSG00000240366.1	RPL36AP45	20.4272	-1.23123	0.542522	-2.26946	0.0232402	0.0657221
ENSG00000108518.7	PFN1	5019.12	-1.23042	0.0916805	-13.4208	4.57e-41	2.01e-39
ENSG00000164111.14	ANXA5	3218.19	-1.23007	0.0762462	-16.1328	1.5e-58	1.02e-56
ENSG00000219391.1	AC019129.1	112.553	-1.22937	0.243743	-5.04372	4.57e-07	3.05e-06
ENSG00000170540.14	ARL6IP1	2605.81	-1.22932	0.0892267	-13.7775	3.48e-43	1.6e-41
ENSG00000266965.1	RP11-712P20.2	25.0901	-1.22926	0.513942	-2.39182	0.016765	0.0496876
ENSG00000198612.10	COPS8	940.802	-1.22891	0.103986	-11.818	3.15e-32	1e-30
ENSG00000215796.3	RP11-551G24.2	8.88482	-1.22804	0.789083	-1.55628	0.11964	0.25527
ENSG00000272150.5	NBPF25P	194.761	-1.22707	0.18432	-6.65726	2.79e-11	2.87e-10
ENSG00000180370.10	PAK2	3021.89	-1.227	0.0825505	-14.8637	5.67e-50	3.15e-48
ENSG00000132692.18	BCAN	33.6775	-1.22689	0.39255	-3.12543	0.00177544	0.00672716
ENSG00000273552.1	RP11-87C7.3	11.7732	-1.22661	0.769652	-1.59372	0.110998	0.240944
ENSG00000241907.1	RPS20P4	9.0972	-1.22648	0.894499	-1.37113	0.170333	0.333496
ENSG00000009724.16	MASP2	105.825	-1.22607	0.262215	-4.67582	2.93e-06	1.77e-05
ENSG00000168994.13	PXDC1	480.832	-1.22577	0.134454	-9.11665	7.75e-20	1.42e-18
ENSG00000213857.3	RP11-12M9.4	55.2053	-1.22532	0.323349	-3.78945	0.000150981	0.000701229
ENSG00000139278.9	GLIPR1	109.272	-1.2247	0.228402	-5.36204	8.23e-08	6.03e-07
ENSG00000139132.14	FGD4	403.907	-1.22465	0.131175	-9.336	1e-20	1.92e-19
ENSG00000164933.11	SLC25A32	793.124	-1.22321	0.105519	-11.5924	4.51e-31	1.37e-29
ENSG00000223676.1	RPL34P26	43.7767	-1.22203	0.37678	-3.24334	0.00118137	0.00464966
ENSG00000119917.13	IFIT3	81.8795	-1.22147	0.278301	-4.38903	1.14e-05	6.31e-05
ENSG00000269546.1	CLIC4P2	14.3709	-1.22109	0.626726	-1.94836	0.051372	0.128698
ENSG00000186174.12	BCL9L	1158.87	-1.2204	0.0946674	-12.8915	5.03e-38	1.97e-36
ENSG00000263988.2	RN7SL147P	21.2374	-1.22015	0.566114	-2.15531	0.0311375	0.0846855
ENSG00000258397.1	BCAR1P1	15.7656	-1.2198	0.596715	-2.0442	0.0409343	0.106631
ENSG00000092841.18	MYL6	2872.8	-1.21873	0.104083	-11.7092	1.14e-31	3.56e-30
ENSG00000270528.1	RP11-674I16.2	6.29306	-1.21832	0.955154	-1.27552	0.202126	0.378949
ENSG00000162734.12	PEA15	2699.61	-1.21828	0.0906696	-13.4364	3.7e-41	1.63e-39
ENSG00000234793.1	AC114730.7	8.54038	-1.21817	0.78386	-1.55407	0.120168	0.256109
ENSG00000213694.3	S1PR3	1319.86	-1.21802	0.0954896	-12.7556	2.9e-37	1.1e-35
ENSG00000263432.2	RN7SL689P	7.85434	-1.21801	0.826342	-1.47398	0.140486	0.289311
ENSG00000239443.1	PABPC1P10	62.1386	-1.21768	0.309049	-3.94009	8.14e-05	0.00039628
ENSG00000175395.15	ZNF25	162.622	-1.21718	0.218475	-5.57126	2.53e-08	1.97e-07
ENSG00000171992.12	SYNPO	177.64	-1.21705	0.198318	-6.13684	8.42e-10	7.61e-09
ENSG00000145107.15	TM4SF19	63.3912	-1.21696	0.309149	-3.93647	8.27e-05	0.000402027
ENSG00000260578.1	CTD-2541J13.1	15.786	-1.21678	0.729191	-1.66867	0.0951823	0.213309
ENSG00000259932.1	CTD-2651B20.7	44.4425	-1.21634	0.340867	-3.56837	0.000359205	0.00155945
ENSG00000267551.3	AC005264.2	12.9334	-1.21582	0.712985	-1.70526	0.0881459	0.200349
ENSG00000035862.12	TIMP2	2604.89	-1.21577	0.0897141	-13.5516	7.75e-42	3.47e-40
ENSG00000130270.16	ATP8B3	174.387	-1.21571	0.202297	-6.00953	1.86e-09	1.64e-08
ENSG00000271153.1	RPL23AP88	7.98389	-1.21539	0.826816	-1.46996	0.141571	0.290976
ENSG00000175336.9	APOF	14.8178	-1.2151	0.638294	-1.90367	0.0569533	0.140038
ENSG00000165502.6	RPL36AL	592.455	-1.21501	0.249075	-4.8781	1.07e-06	6.85e-06
ENSG00000198860.11	TSEN15	557.457	-1.21417	0.120176	-10.1033	5.34e-24	1.21e-22
ENSG00000058673.15	ZC3H11A	3358.56	-1.21339	0.0743036	-16.3302	6.02e-60	4.22e-58
ENSG00000213785.3	RP11-449L13.2	20.4554	-1.21332	0.530589	-2.28674	0.0222108	0.0632817
ENSG00000123485.11	HJURP	763.051	-1.21331	0.111327	-10.8987	1.17e-27	3.07e-26
ENSG00000266338.6	NBPF15	1051.44	-1.21276	0.0958475	-12.653	1.08e-36	4e-35
ENSG00000116679.15	IVNS1ABP	1915.14	-1.212	0.0856271	-14.1544	1.76e-45	8.58e-44
ENSG00000100439.10	ABHD4	335.847	-1.21187	0.199155	-6.08507	1.16e-09	1.04e-08
ENSG00000131389.16	SLC6A6	858.375	-1.21147	0.105768	-11.454	2.24e-30	6.62e-29
ENSG00000095303.14	PTGS1	29.9748	-1.21063	0.475319	-2.54698	0.010866	0.0341769
ENSG00000220267.1	ACTBP8	83.9348	-1.21022	0.257971	-4.69131	2.71e-06	1.65e-05
ENSG00000235587.2	GAPDHP65	227.243	-1.20909	0.171371	-7.05541	1.72e-12	1.96e-11
ENSG00000264322.2	RN7SL448P	11.6802	-1.20908	0.731014	-1.65398	0.0981321	0.218355
ENSG00000258769.1	RAP1AP	8.30937	-1.20898	0.786251	-1.53765	0.124134	0.262769
ENSG00000008441.16	NFIX	839.595	-1.20763	0.10387	-11.6263	3.03e-31	9.28e-30
ENSG00000175416.12	CLTB	727.141	-1.20746	0.124167	-9.7245	2.37e-22	4.95e-21
ENSG00000249784.1	SCARNA22	17.8328	-1.20715	0.55605	-2.17094	0.029936	0.0819325
ENSG00000102871.15	TRADD	82.6516	-1.20702	0.283186	-4.26228	2.02e-05	0.000108383
ENSG00000177106.14	EPS8L2	1204.9	-1.20677	0.101725	-11.863	1.84e-32	5.88e-31
ENSG00000085982.13	USP40	425.461	-1.20653	0.123607	-9.76101	1.65e-22	3.5e-21
ENSG00000259017.1	RP11-561B11.6	16.0413	-1.20569	0.656404	-1.83682	0.0662373	0.158704
ENSG00000136938.8	ANP32B	1673.8	-1.20433	0.0974083	-12.3638	4.1e-35	1.45e-33
ENSG00000158104.11	HPD	12.7158	-1.20398	0.621452	-1.93737	0.0527	0.131486
ENSG00000244091.1	RN7SL483P	41.1956	-1.20291	0.412829	-2.91382	0.00357032	0.0126396
ENSG00000182263.13	FIGN	435.631	-1.20281	0.133481	-9.01106	2.04e-19	3.65e-18
ENSG00000196517.11	SLC6A9	158.337	-1.20276	0.255288	-4.71137	2.46e-06	1.5e-05
ENSG00000171940.13	ZNF217	1435.24	-1.20067	0.0862588	-13.9193	4.83e-44	2.25e-42
ENSG00000254759.1	NAP1L1P1	110.823	-1.20016	0.241044	-4.97902	6.39e-07	4.2e-06
ENSG00000103404.14	USP31	786.329	-1.20009	0.109712	-10.9386	7.54e-28	2e-26
ENSG00000079150.17	FKBP7	128.535	-1.19985	0.229671	-5.2242	1.75e-07	1.23e-06
ENSG00000155975.9	VPS37A	545.335	-1.19897	0.120735	-9.93051	3.07e-23	6.7e-22
ENSG00000118197.13	DDX59	299.522	-1.19854	0.154624	-7.75132	9.09e-15	1.23e-13
ENSG00000223864.1	NPM1P19	90.2147	-1.19821	0.266083	-4.50313	6.7e-06	3.84e-05
ENSG00000269893.6	SNHG8	643.109	-1.19796	0.117397	-10.2044	1.9e-24	4.41e-23
ENSG00000264608.1	RP11-192H23.8	11.6754	-1.19796	0.710798	-1.68537	0.0919166	0.207428
ENSG00000101255.10	TRIB3	1353.64	-1.19758	0.122764	-9.75518	1.75e-22	3.69e-21
ENSG00000224577.1	LINC01117	9.19079	-1.19655	0.740973	-1.61483	0.106347	0.232769
ENSG00000104728.15	ARHGEF10	139.284	-1.19593	0.236096	-5.06541	4.08e-07	2.74e-06
ENSG00000092010.14	PSME1	810.981	-1.19558	0.108406	-11.0288	2.78e-28	7.51e-27
ENSG00000279641.1	CTD-2545G14.6	10.6886	-1.19453	0.71561	-1.66925	0.0950687	0.213106
ENSG00000243633.3	RN7SL542P	85.3308	-1.19444	0.273748	-4.36328	1.28e-05	7.07e-05
ENSG00000154640.14	BTG3	693.653	-1.19424	0.115375	-10.351	4.14e-25	9.84e-24
ENSG00000230216.1	HSPB1P2	37.763	-1.19386	0.383262	-3.11501	0.00183938	0.00694884
ENSG00000185022.11	MAFF	690.166	-1.19376	0.119017	-10.0302	1.12e-23	2.51e-22
ENSG00000257433.5	RP1-197B17.3	7.78855	-1.19369	0.833725	-1.43175	0.152215	0.307694
ENSG00000120896.13	SORBS3	1009.16	-1.19286	0.111194	-10.7278	7.54e-27	1.91e-25
ENSG00000171055.14	FEZ2	816.355	-1.19254	0.107957	-11.0464	2.28e-28	6.2e-27
ENSG00000222038.3	POTEJ	181.238	-1.19101	0.213324	-5.58308	2.36e-08	1.85e-07
ENSG00000196155.12	PLEKHG4	291.556	-1.19052	0.155741	-7.64426	2.1e-14	2.78e-13
ENSG00000205639.9	MFSD2B	150.893	-1.18971	0.210885	-5.6415	1.69e-08	1.34e-07
ENSG00000169093.15	ASMTL	135.545	-1.1897	0.223894	-5.31367	1.07e-07	7.75e-07
ENSG00000225355.1	ARL6IP1P2	32.8338	-1.18882	0.418623	-2.83985	0.00451351	0.0156249
ENSG00000109320.11	NFKB1	748.712	-1.18814	0.108717	-10.9287	8.4e-28	2.23e-26
ENSG00000257519.1	RP11-116D17.2	9.63053	-1.18803	0.791021	-1.5019	0.133124	0.27791
ENSG00000154229.11	PRKCA	1764.18	-1.1877	0.0848422	-13.9989	1.58e-44	7.5e-43
ENSG00000154447.14	SH3RF1	640.904	-1.18705	0.110129	-10.7787	4.34e-27	1.11e-25
ENSG00000144283.21	PKP4	1656.01	-1.18666	0.0899153	-13.1975	9.07e-40	3.77e-38
ENSG00000270640.1	RP11-373D23.2	5.61057	-1.18618	1.09683	-1.08146	0.279493	0.475668
ENSG00000216616.1	RP11-550C4.4	8.76904	-1.18596	0.75886	-1.56282	0.118095	0.252819
ENSG00000171051.8	FPR1	37.7349	-1.1854	0.389364	-3.04445	0.00233107	0.00859745
ENSG00000153002.11	CPB1	10.6129	-1.18539	0.755993	-1.568	0.116882	0.250872
ENSG00000231574.5	KCCAT211	67.1227	-1.18447	0.316474	-3.74271	0.000182045	0.000833946
ENSG00000116133.11	DHCR24	5493.59	-1.18436	0.094963	-12.4718	1.06e-35	3.8e-34
ENSG00000075711.20	DLG1	2605.41	-1.18369	0.0829538	-14.2693	3.4e-46	1.69e-44
ENSG00000154305.16	MIA3	2153.57	-1.18273	0.0797784	-14.8251	1.01e-49	5.56e-48
ENSG00000120725.12	SIL1	521.829	-1.1827	0.11883	-9.95292	2.45e-23	5.38e-22
ENSG00000077152.9	UBE2T	453.559	-1.18261	0.138216	-8.5562	1.17e-17	1.9e-16
ENSG00000267369.1	RP11-1094M14.8	10.4184	-1.18253	0.686972	-1.72136	0.0851855	0.194974
ENSG00000232917.5	HSPE1P6	45.7235	-1.1818	0.332101	-3.55856	0.000372893	0.00161365
ENSG00000248596.7	RP11-844P9.5	28.0276	-1.18163	0.494991	-2.38718	0.0169783	0.0502139
ENSG00000174099.10	MSRB3	622.412	-1.1812	0.108509	-10.8857	1.35e-27	3.53e-26
ENSG00000213553.4	RPLP0P6	2471.72	-1.18063	0.091835	-12.856	7.96e-38	3.09e-36
ENSG00000185989.10	RASA3	522.47	-1.18058	0.140061	-8.42903	3.49e-17	5.5e-16
ENSG00000206885.1	SNORA75	7.49473	-1.18	0.903022	-1.30673	0.191305	0.363628
ENSG00000260855.1	RP11-439E19.10	43.1125	-1.17985	0.409657	-2.88009	0.00397564	0.0139553
ENSG00000048162.20	NOP16	339.454	-1.17981	0.13635	-8.65279	5.03e-18	8.32e-17
ENSG00000259790.1	ANP32BP1	123.8	-1.1797	0.21474	-5.49364	3.94e-08	3e-07
ENSG00000144668.11	ITGA9	29.4345	-1.17936	0.538331	-2.19078	0.0284679	0.078387
ENSG00000197935.6	ZNF311	27.5343	-1.17872	0.431222	-2.73345	0.00626748	0.0209569
ENSG00000206538.8	VGLL3	1210.27	-1.17859	0.0926897	-12.7155	4.85e-37	1.83e-35
ENSG00000143486.15	EIF2D	995.833	-1.17778	0.0991174	-11.8826	1.46e-32	4.68e-31
ENSG00000231007.5	CDC20P1	124.823	-1.17685	0.217241	-5.41725	6.05e-08	4.51e-07
ENSG00000188613.6	NANOS1	190.783	-1.1766	0.16857	-6.97987	2.95e-12	3.3e-11
ENSG00000197536.10	C5orf56	70.8922	-1.17654	0.328174	-3.58509	0.000336962	0.00147015
ENSG00000114853.13	ZBTB47	190.349	-1.17623	0.185407	-6.344	2.24e-10	2.14e-09
ENSG00000117009.11	KMO	17.613	-1.17559	0.567677	-2.07088	0.0383701	0.101017
ENSG00000142920.16	AZIN2	195.448	-1.17557	0.21875	-5.37403	7.7e-08	5.66e-07
ENSG00000173559.12	NABP1	928.498	-1.17544	0.0989857	-11.8749	1.6e-32	5.12e-31
ENSG00000005302.17	MSL3	240.263	-1.17529	0.162222	-7.24495	4.33e-13	5.19e-12
ENSG00000203666.12	EFCAB2	178.341	-1.17499	0.184984	-6.35188	2.13e-10	2.03e-09
ENSG00000155158.20	TTC39B	435.81	-1.17412	0.142938	-8.21421	2.14e-16	3.21e-15
ENSG00000169258.6	GPRIN1	200.286	-1.17306	0.164624	-7.12569	1.04e-12	1.2e-11
ENSG00000118596.11	SLC16A7	846.269	-1.17254	0.104598	-11.2099	3.64e-29	1.02e-27
ENSG00000233347.1	ERP29P1	23.2544	-1.17245	0.540834	-2.16785	0.0301703	0.0824775
ENSG00000162620.15	LRRIQ3	8.56468	-1.17237	0.791345	-1.48149	0.138475	0.286174
ENSG00000234107.1	TPT1P1	35.2064	-1.17158	0.407048	-2.87823	0.0039991	0.0140322
ENSG00000121957.12	GPSM2	629.992	-1.17044	0.108923	-10.7456	6.22e-27	1.58e-25
ENSG00000166130.14	IKBIP	955.893	-1.17004	0.104084	-11.2413	2.56e-29	7.18e-28
ENSG00000268034.1	AC005795.1	115.789	-1.16795	0.211611	-5.51934	3.4e-08	2.61e-07
ENSG00000145012.12	LPP	3381.81	-1.16795	0.0779741	-14.9787	1.01e-50	5.81e-49
ENSG00000163479.13	SSR2	2011.76	-1.16793	0.0837993	-13.9372	3.76e-44	1.76e-42
ENSG00000200087.1	SNORA73B	3909.17	-1.16768	0.153739	-7.5952	3.07e-14	4.01e-13
ENSG00000231721.6	LINC-PINT	392.616	-1.16647	0.164331	-7.09831	1.26e-12	1.45e-11
ENSG00000184916.8	JAG2	442.613	-1.16642	0.134149	-8.69492	3.47e-18	5.79e-17
ENSG00000279177.1	CH507-338C24.2	6.40315	-1.16621	0.895912	-1.3017	0.193019	0.365947
ENSG00000174989.12	FBXW8	604.164	-1.16604	0.119945	-9.72148	2.44e-22	5.1e-21
ENSG00000123454.10	DBH	5.47883	-1.16586	1.04873	-1.11169	0.266272	0.460579
ENSG00000263547.1	RP11-1O2.1	9.47724	-1.16558	0.758428	-1.53683	0.124334	0.263015
ENSG00000115310.17	RTN4	4613.12	-1.1648	0.069532	-16.7519	5.48e-63	4.23e-61
ENSG00000164323.12	CFAP97	1340.83	-1.16454	0.0880471	-13.2264	6.18e-40	2.61e-38
[truncated: 26,142 more rows]
