# Supplementary material for: Identification of TAZ-Dependent Breast Cancer Vulnerabilities Using a Chemical Genomics Screening Approach
Source: Front Cell Dev Biol. 2021 Jun 15;9:673374. doi: 10.3389/fcell.2021.673374 (PMC8239392; doi:10.3389/fcell.2021.673374)
Supplement: Supplementary file 3 [file Table_3.XLSX]

## Sheet: Small Molecule Library
DRUG NAME	TARGET	PATHWAY	DRUG DESCRIPTION	M.W.	CAS NUMBER	FORMULA	FORM	URL	CATALOG NUMBER
MCC950(CP-456773)	NOD-like receptor	Others	MCC950 sodium salt is a potent, selective inhibitor of NLRP3 with IC50 of 7.5 nM in BMDMs.	426.46	256373-96-3	C20H23N2NaO5S	Salt	http://selleckchem.com/products/mcc950-sodium-salt.html	S7809
CGS 21680 HCl	5-alpha Reductase	Angiogenesis	CGS 21680 HCl is an adenosine A2 receptor agonist with IC50 of 22 nM, exhibits 140-fold over A1 receptor.	535.98	124431-80-7	C23H30ClN7O6	HCl	http://www.selleckchem.com/products/CGS-21680-hydrochloride.html	S2153
Finasteride	5-alpha Reductase	Endocrinology & Hormones	Finasteride is an inhibitor of steroid Type II 5α-reductase.	372.54	98319-26-7	C23H36N2O2	Free Base	http://www.selleckchem.com/products/Finasteride.html	S1197
Dutasteride	5-alpha Reductase	Endocrinology & Hormones	Dutasteride is a dual 5-α reductase inhibitor that inhibits conversion of testosterone to dihydrotestosterone (DHT).	528.53	164656-23-9	C27H30F6N2O2	Free Base	http://www.selleckchem.com/products/Dutasteride.html	S1202
Pimavanserin	5-HT Receptor	GPCR & G Protein	Pimavanserin is a potent and selective serotonin 5-HT2A inverse agonist with pIC50 of 8.73, used to treat psychosis associated with Parkinson’s disease.	1005.2	706782-28-7	C54H74F2N6O10	Free Base	http://selleckchem.com/products/pimavanserin.html	S8183
Fluvoxamine maleate	5-HT Receptor	Neuronal Signaling	Fluvoxamine maleate is a selective serotonin (5-HT) reuptake inhibitor (SSRI).	434.41	61718-82-9	C19H25F3N2O6	Maleate	http://www.selleckchem.com/products/Fluvoxamine-maleate.html	S1336
SB742457	5-HT Receptor	Neuronal Signaling	SB742457 is a highly selective 5-HT6 receptor antagonist with pKi of 9.63, exhibits >100-fold selectivity over other receptors. Phase 2.	353.44	607742-69-8	C19H19N3O2S	Free Base	http://www.selleckchem.com/products/sb-742457.html	S2894
Sertraline HCl	5-HT Receptor	Neuronal Signaling	Sertraline HCl is a 5-HT antagonist with Ki of 13 nM.	342.69	79559-97-0	C17H18Cl3N	HCl	http://www.selleckchem.com/products/sertraline-hcl.html	S4053
Vilazodone HCl	5-HT Receptor	Neuronal Signaling	Vilazodone HCl is a selective serotonin reuptake inhibitor (SSRI) and a partial agonist of 5-HT1A receptors, used for the treatment of major depressive disorder.	477.99	163521-08-2	C26H28ClN5O2	Hydrochloride	http://selleckchem.com/products/vilazodone-hcl.html	S4259
Cyproheptadine hydrochloride	5-HT receptor	Neuronal Signaling	Cyproheptadine hydrochloride is non-selective 5HT2 antagonist with IC50 of 0.6 nM. Also a SETD7/9 inhibitor.	350.88	41354-29-4	C21H22ClNR	hydrochloride	http://selleckchem.com/products/cyproheptadine-hydrochloride.html	S4635
Guanfacine Hydrochloride	5-HT Receptor	Neuronal Signaling	Guanfacine Hydrochloride is a selective α2A-adrenoceptor agonist with anti-hypertensive effect.	282.55	29110-48-3	C9H10Cl3N3O	hydrochloride	http://selleckchem.com/products/guanfacine-hydrochloride.html	S4693
PFK15	6-phosphofructo-2-kinase (PFKFB3)	Others	PFK15 is a potent and selective 6-phosphofructo-2-kinase (PFKFB3) with IC50 of 207 nM.	260.29	4382-63-2	C17H12N2O	Free Base	http://www.selleckchem.com/products/pfk15.html	S7289
Tropicamide	AChR	Neuronal Signaling	Tropicamide is an anticholinergic and a muscarinic receptor subtype M4-preferring antagonist with IC50 of 8.0 nM.	284.35	1508-75-4	C17H20N2O2	Free Base	http://www.selleckchem.com/products/tropicamide.html	S1913
Pancuronium dibromide	AChR	Neuronal Signaling	Pancuronium dibromide is a competitive acetylcholine antagonist with an IC50 of 5.5 ± 0.5 nM.	732.67	15500-66-0	C35H60Br2N2O4	Bromide	http://www.selleckchem.com/products/Pancuronium-bromide(Pavulon).html	S2497
Trospium chloride	AChR	Neuronal Signaling	Trospium chloride (Sanctura) is a competitive muscarinic cholinergic receptor antagonist.	427.96	10405-02-4	C25H30ClNO3	Chloride	http://www.selleckchem.com/products/Trospium-chloride-Sanctura.html	S2549
PNU-120596	AChR	Neuronal Signaling	PNU-120596 is a positive allosteric modulator of α7 nAChR with EC50 of 216 nM.	311.72	501925-31-1	C13H14ClN3O4	Free Base	http://www.selleckchem.com/products/pnu120596.html	S2629
5-hydroxymethyl Tolterodine (PNU 200577, 5-HMT, 5-HM)	AChR	Neuronal Signaling	5-hydroxymethyl tolterodine (PNU 200577) is a new muscarinic receptor antagonist with Kb of 0.84 nM.	341.49	207679-81-0	C22H31NO2	Free Base	http://www.selleckchem.com/products/5-hydroxymethyl-tolterodine-pnu-200577.html	S2659
Hexamethonium Bromide	AChR	Neuronal Signaling	Hexamethonium Bromide is a selective antagonist of neuronal-type nicotinic AChR in ganglia.	362.19	55-97-0	C12H30Br2N2	Bromide	http://selleckchem.com/products/hexamethonium-bromide.html	S4069
SCH58261	Adenosine Receptor	GPCR & G Protein	SCH 58261 is a potent and selective A2a adenosine receptor antagonist with Ki of 2.3 nM and 2 nM for rat A2a and bovine A2a, respectively.	345.36	160098-96-4	C18H15N7O	Free Base	http://selleckchem.com/products/sch58261.html	S8104
ZM241385	Adenosine Receptor	GPCR & G Protein	ZM-241385?is a high affinity antagonist ligand selective for the adenosine A2A receptor.	337.34	139180-30-6	C16H15N7O2	Free Base	http://selleckchem.com/products/zm241385.html	S8105
Propranolol HCl	Adrenergic Receptor	GPCR & G Protein	Propranolol HCl is a competitive non-selective beta-adrenergic receptors inhibitor with IC50 of 12 nM.	295.8	318-98-9	C16H22ClNO2	HCl	http://www.selleckchem.com/products/propranolol-hcl.html	S4076
Labetalol HCl	Adrenergic Receptor	GPCR & G Protein	Labetalol HCl is a dual antagonist for both selective alpha1-adrenergic and nonselective beta-adrenergic receptors, used in the treatment of high blood pressure.	364.87	32780-64-6	C19H25ClN2O3	Salt	http://www.selleckchem.com/products/labetalol-hcl.html	S4291
Terazosin	Adrenergic receptor	GPCR & G Protein	Terazosin is a selective alpha-1 antagonist used for treatment of symptoms of an enlarged prostate (BPH). It works by blocking the action of adrenaline on smooth muscle of the bladder and the blood vessel walls.	423.89	63074-08-8	C19H26ClN5O4	hydrochloride	http://selleckchem.com/products/terazosin.html	S4679
L755507	adrenergic receptor	GPCR & G Protein	L-755,507 is characterized as a potent and selective β3 adrenergic receptor partial agonist with EC50 of 0.43 nM. It is also recently identified to enhance CRISPR-mediated homology-directed repair (HDR) efficiency in human induced pluripotent stem cells (iPSCs) and other cell types.	584.73	159182-43-1	C30H40N4O6S	Free Base	http://selleckchem.com/products/l755507.html	S7974
ICI-118551	Adrenergic Receptor	GPCR & G Protein	ICI-118551 is a highly selective β2-adrenergic receptor antagonist with Ki values of 0.7, 49.5 and 611 nM for β2, β1 and β3 receptors, respectively.	313.86	1217094-53-5	C17H28ClNO2	Salt	http://selleckchem.com/products/ici-118551-ici-118-551.html	S8114
Terbutaline Sulfate	Adrenergic Receptor	GPCR & G Protein	Terbutaline Sulfate is a selective β2-adrenergic receptor agonist with IC50 of 53 nM.	548.65	23031-32-5	C24H40N2O10S	Sulfate	http://selleckchem.com/products/terbutaline-sulfate.html	S4127
Doxazosin Mesylate	Adrenergic Receptor	Neuronal Signaling	Doxazosin mesylate is an alpha-1 adrenergic receptor blocker.	547.58	77883-43-3	C24H29N5O8S	Mesylate	http://www.selleckchem.com/products/Doxazosin-mesylate.html	S1324
Nebivolol	Adrenergic Receptor	Neuronal Signaling	Nebivolol selectively inhibits β1-adrenoceptor with IC50 of 0.8 nM.	441.9	152520-56-4	C22H26ClF2NO4	Free Base	http://www.selleckchem.com/products/Nebivolol(Bystolic).html	S1549
Carvedilol	Adrenergic Receptor	Neuronal Signaling	Carvedilol is a non-selective beta blocker/alpha-1 blocker with an IC50 of 3.8 μM for inhibition of LDL oxidation.	406.47	72956-09-3	C24H26N2O4	Free Base	http://www.selleckchem.com/products/carvedilol.html	S1831
Formoterol Hemifumarate	Adrenergic Receptor	Neuronal Signaling	Formoterol hemifumarate is a potent, selective and long-acting β2-adrenoceptor agonist to β2 and β1 receptors with pKd of 8.12 and 5.58, respectively.	402.4	43229-80-7	C42H52N4O12	Fumarate	http://www.selleckchem.com/products/formoterol-hemifumarate.html	S2020
Naftopidil	Adrenergic Receptor	Neuronal Signaling	Naftopidil (Flivas) is a selective α1-adrenergic receptor antagonist or alpha blocker with a Ki of 58.3 nM.	392.49	57149-07-2	C24H28N2O3	Free Base	http://www.selleckchem.com/products/Naftopidil(Flivas).html	S2126
Oxymetazoline hydrochloride	Adrenergic Receptor	Neuronal Signaling	Oxymetazoline hydrochloride is an α1 and α2 adrenergic receptor agonist.	296.84	2315-02-8	C16H25ClN2O	Hydrochloride	http://www.selleckchem.com/products/Oxymetazoline-hydrochloride.html	S2495
Mirabegron	Adrenergic Receptor	Neuronal Signaling	Mirabegron is a selective β3-adrenoceptor agonist with EC50 of 22.4 nM.	396.51	223673-61-8	C21H24N4O2S	Free Base	http://www.selleckchem.com/products/mirabegron-ym178.html	S4009
Tolazoline HCl	Adrenergic Receptor	Neuronal Signaling	Tolazoline is a non-selective competitive α-adrenergic receptor antagonist.	196.68	59-97-2	C10H13ClN2	Free Base	https://www.selleckchem.com/products/tolazoline-hcl.html	S4124
MK-2206 2HCl	Akt	Others	MK-2206 2HCl is a highly selective inhibitor of Akt1/2/3 with IC50 of 8 nM/12 nM/65 nM, respectively; no inhibitory activities against 250 other protein kinases observed. Phase 2.	480.39	1032350-13-2	C25H23Cl2N5O	Dihydrochloride	http://www.selleckchem.com/products/MK-2206.html	S1078
GSK690693	Akt	Others	GSK690693 is a pan-Akt inhibitor targeting Akt1/2/3 with IC50 of 2 nM/13 nM/9 nM, also sensitive to the AGC kinase family: PKA, PrkX and PKC isozymes. Phase 1.	425.48	937174-76-0	C21H27N7O3	Free Base	http://www.selleckchem.com/products/GSK690693.html	S1113
CCT128930	Akt	PI3K/Akt/mTOR	CCT128930 is a potent, ATP-competitive and selective inhibitor of Akt2 with IC50 of 6 nM, 28-fold greater selectivity for Akt2 than the closely related PKA kinase.	341.84	885499-61-6	C18H20ClN5	Free Base	http://www.selleckchem.com/products/cct128930.html	S2635
GDC-0068	Akt	PI3K/Akt/mTOR	GDC-0068 is a highly selective pan-Akt inhibitor targeting Akt1/2/3 with IC50 of 5 nM/18 nM/8 nM, 620-fold selectivity over PKA. Phase 2.	458	1001264-89-6	C24H32ClN5O2	Free Base	http://www.selleckchem.com/products/gdc-0068.html	S2808
Uprosertib (GSK2141795)	Akt	PI3K/Akt/mTOR	Uprosertib (GSK2141795) is a selective, ATP-competitive, and orally bioavailable Akt inhibitor with IC50 of 180 nM, 328 nM, and 38 nM for Akt 1, 2 and 3, respectively. Phase 2.	429.25	1047634-65-0	C18H16Cl2F2N4O2	Free Base	http://selleckchem.com/products/gsk2141795.html	S7492
AP26113	ALK	Protein Tyrosine Kinase	AP26113 is a potent ALK inhibitor with IC50 of 0.62 nM, demonstrated ability overcome Crizotinib resistance mediated by a L1196M mutation. Phase 1/2.	529.01	1197958-12-5	C26H34ClN6O2P	Free Base	http://www.selleckchem.com/products/ap26113.html	S7000
LDK378	ALK	Protein Tyrosine Kinase	LDK378 is potent inhibitor against ALK with IC50 of 0.2 nM, shows 40- and 35-fold selectivity against IGF-1R and InsR, respectively. Phase 2.	558.14	1032900-25-6	C28H36ClN5O3S	Free Base	http://www.selleckchem.com/products/ldk378.html	S7083
AZD3463	ALK	Protein Tyrosine Kinase	AZD3463 is a novel orally bioavailable ALK inhibitor with Ki of 0.75 nM, which also inhibits IGF1R with equivalent potency.	448.95	1356962-20-3	C24H25ClN6O	Free Base	http://www.selleckchem.com/products/azd3463.html	S7106
ASP3026	ALK	Protein Tyrosine Kinase	ASP3026 is a novel and selective inhibitor for ALK with IC50 of 3.5 nM. Phase 1.	580.74	1097917-15-1	C29H40N8O3S	Free Base	http://selleckchem.com/products/asp3026.html	S8054
Aniracetam	AMPA Receptor-kainate Receptor-NMDA Receptor	Neuronal Signaling	Aniracetam is a nootropics and neuroprotective drug.	219.24	72432-10-1	C12H13NO3	Free Base	http://www.selleckchem.com/products/Aniracetam.html	S1281
Memantine HCl	AMPA Receptor-kainate Receptor-NMDA Receptor	Neuronal Signaling	Memantine hydrochloride (Namenda) is a CYP2B6 and CYP2D6 inhibitor for recombinant CYP2B6 and CYP2D6 with Ki of 0.51 nM and 94.9 μM, respectively.	215.76	41100-52-1	C12H22ClN	Hydrochloride	http://www.selleckchem.com/products/memantine-hydrochloride-namenda.html	S2043
Acadesine	AMPK	PI3K/Akt/mTOR	Acadesine results in accumulation of ZMP, which mimics the stimulating effect of AMP on AMPK and AMPK kinase. Phase 3.	258.23	2627-69-2	C9H14N4O5	Free Base	http://www.selleckchem.com/products/Acadesine.html	S1802
A-769662	AMPK	PI3K/Akt/mTOR	A-769662 is a potent, reversible AMPK activator with EC50of 0.8 μM, little effect on GPPase/FBPase activity.	360.39	844499-71-4	C20H12N2O3S	Free Base	http://www.selleckchem.com/products/a-769662.html	S2697
WZ4003	AMPK	PI3K/Akt/mTOR	WZ4003 is a highly specific NUAK kinase inhibitor with IC50 of 20 nM and 100 nM for NUAK1 and NUAK2, respectively, without significant inhibition on 139 other kinases.	496.99	1214265-58-3	C25H29ClN6O3	Free Base	http://www.selleckchem.com/products/wz4003.html	S7317
HTH-01-015	AMPK	PI3K/Akt/mTOR	HTH-01-015 is a potent and selective <b>NUAK1</b> inhibitor with <b>IC50</b> of 100 nM, >100-fold selectivity over NUAK2.	468.55	1613724-42-7	C26H28N8O	Free Base	http://www.selleckchem.com/products/hth-01-015.html	S7318
Dorsomorphin 2HCl	AMPK	PI3K/Akt/mTOR	Dorsomorphin 2HCl is a potent, reversible, selective AMPK inhibitor with Ki of 109 nM in cell-free assays, exhibiting no significant inhibition of several structurally related kinases including ZAPK, SYK, PKCθ, PKA, and JAK3. Also inhibits type Ⅰ BMP receptor activity.	472.41	1219168-18-9	C24H27Cl2N5O	Dihydrochloric	http://selleckchem.com/products/dorsomorphin-2hcl.html	S7306
MK-2866 (GTx-024)	Androgen Receptor	Endocrinology & Hormones	MK-2866 (GTx-024) is a selective androgen receptor modulator (SARM) with Ki of 3.8 nM, and is tissue-selective for anabolic organs. Phase 3.	389.33	841205-47-8	C19H14F3N3O3	Free Base	http://www.selleckchem.com/products/Ostarine.html	S1174
EPI-001	Androgen Receptor	Endocrinology & Hormones	EPI-001 is an androgen receptor N-terminal domain antagonist with IC50 of ∼6 μM and a selective PPAR-gamma modulator.	394.89	227947-06-0	C21H27ClO5	Free Base	http://selleckchem.com/products/epi-001.html	S7955
Dexmedetomidine HCl (Precedex)	Androgen Receptor	Neuronal Signaling	Dexmedetomidine is a highly selective and potent alpha-2 adrenoceptor agonist, which reduces anesthetic requirements for patients by providing significant sedation.	236.74	145108-58-3	C13H17ClN2	HCl	http://www.selleckchem.com/products/dexmedetomidine-hcl-precedex.html	S2090
Enzalutamide (MDV3100)	Androgen Receptor, P450	Endocrinology & Hormones	Enzalutamide (MDV3100) is an androgen-receptor (AR) antagonist with IC50 of 36 nM.	464.44	915087-33-1	C21H16F4N4O2S	Free Base	http://www.selleckchem.com/products/MDV3100.html	S1250
Cyproterone Acetate	Androgen Receptor/P450	Endocrinology & Hormones	Cyproterone acetate is an androgen receptor (AR) antagonist with IC50 of 7.1 nM, as well as a weak progesterone receptor agonist with weak pro-gestational and glucocorticoid activity.	416.94	427-51-0	C24H29ClO4	Acetate	http://www.selleckchem.com/products/cyproterone-acetate.html	S2042
GSK2830371	Angiogenesis	Angiogenesis	GSK2830371 is an orally active, allosteric <b>Wip1 phosphatase</b> inhibitor with <b>IC50</b> of 6 nM.	461.02	1404456-53-6	C23H29ClN4O2S	Free Base	http://www.selleckchem.com/products/gsk2830371.html	S7573
Anastrozole	Aromatase	Endocrinology & Hormones	Anastrozole is a third-generation nonsteroidal selective aromatase inhibitor.	293.37	120511-73-1	C17H19N5	Free Base	http://www.selleckchem.com/products/Anastrozole.html	S1188
Exemestane	Aromatase	Endocrinology & Hormones	Exemestane is an aromatase inhibitor, inhibits human placental and rat ovarian aromatase with IC50 of 30 nM and 40 nM, respectively.	296.4	107868-30-4	C20H24O2	Free Base	http://www.selleckchem.com/products/Exemestane.html	S1196
Letrozole	Aromatase	Endocrinology & Hormones	Letrozole is a third generation inhibitor of aromatase with IC50 of 0.07-20 nM.	285.3	112809-51-5	C17H11N5	Free Base	http://www.selleckchem.com/products/Letrozole.html	S1235
KU-60019	ATM	DNA Damage	KU-60019 is an improved analogue of KU-55933, with IC50 of 6.3 nM for ATM, 270- and 1600-fold more selective for ATM than DNA-PK and ATR,and is a highly effective radiosensitizer.	547.67	925701-49-1	C30H33N3O5S	Free Base	http://www.selleckchem.com/products/KU-60019.html	S1570
KU-55933 (ATM Kinase Inhibitor)	ATM	Others	KU-55933 is a potent and specific ATM inhibitor with IC50/Ki of 12.9 nM/2.2 nM, and is highly selective for ATM as compared to DNA-PK, PI3K/PI4K, ATR and mTOR.	395.49	587871-26-9	C21H17NO3S2	Free Base	http://www.selleckchem.com/products/KU-55933.html	S1092
CGK 733	ATM/ATR	DNA Damage	CGK 733 is a potent and selective inhibitor of ATM/ATR with IC50 of ~200 nM.	555.84	905973-89-9	C23H18Cl3FN4O3S	Free Base	http://www.selleckchem.com/products/cgk-733.html	S7136
VE-821	ATM/ATR	DNA Damage	VE-821 is a potent and selective ATP competitive inhibitor of ATR with Ki/IC50 of 13 nM/26 nM, shows inhibition of H2AX phosphorylation, minimal activity against PIKKs ATM, DNA-PK, mTOR and PI3Kγ.	368.41	1232410-49-9	C18H16N4O3S	Free Base	http://www.selleckchem.com/products/ve-821.html	S8007
AZ20	ATM/ATR	PI3K/Akt/mTOR	AZ20 is a novel potent and selective inhibitor of ATR kinase with IC50 of 5 nM, 8-fold selectivity over mTOR.	412.51	1233339-22-4	C21H24N4O3S	Free Base	http://www.selleckchem.com/products/az20.html	S7050
VE-822	ATM/ATR	PI3K/Akt/mTOR	VE-822 is an ATR inhibitor with IC50 of 19 nM.	463.55	1232416-25-9	C24H25N5O3S	Free Base	http://www.selleckchem.com/products/ve-822.html	S7102
AZD6738	ATM/ATR	PI3K/Akt/mTOR	AZD6738 is an orally active, and selective <b>ATR</b> kinase inhibitor with <b>IC50</b> of 1 nM. Phase 1/2.	412.51	1352226-88-0	C20H24N6O2S	Free Base	http://www.selleckchem.com/products/azd6738.html	S7693
Esomeprazole Sodium	ATPase	Transmembrane Transporters	Esomeprazole sodium (Nexium) is a sodium salt of esomeprazole that is a potent proton pump inhibitor with an IC50 of 0.076 mg/kg.	367.4	161796-78-7	C17H18N3NaO3S	Free Base	http://www.selleckchem.com/products/Esomeprazole-sodium-Nexium-I.V..html	S2233
Golgicide A	ATPase	Transmembrane Transporters	Golgicide A is a potent and rapidly reversible GBF1 inhibitor.	284.3	1139889-93-2	C17H14F2N2	Free Base	http://www.selleckchem.com/products/golgicide-a.html	S7266
BTB06584	ATPase	Transmembrane Transporters	BTB06584 is an IF1-dependent, selective inhibitor of the mitochondrial F1 Fo-ATPase.	417.82	219793-45-0	C19H12ClNO6S	Free Base	http://www.selleckchem.com/products/btb06584.html	S7460
CB-5083	ATPase	Transmembrane Transporters	CB-5083 is a potent, selective, and orally bioavailable p97 AAA ATPase inhibitor with IC50 of 11 nM. Phase 1.	413.47	1542705-92-9	C24H23N5O2	Free Base	http://selleckchem.com/products/cb-5083.html	S8101
PF-3716556	ATPase,Proton Pump	Transmembrane Transporters	PF 3716556 is a potent and selective P-CAB (potassium-competitive acid blocker), with pIC50 of 6.026 and 7.095 for the inhibition of porcine H+,K+-ATPase activity in ion-leaky and ion-tight assay, respectively, inhibits gastric acid secretion, displays no activity at Na+,K+-ATPase, used for the treatment of gastroesophageal reflux disease.	394.47	928774-43-0	C22H26N4O3	Free Base	http://selleckchem.com/products/PF-3716556.html	S2222
VX-680 (Tozasertib, MK-0457)	Aurora Kinase	Endocrinology & Hormones	VX-680 (Tozasertib, MK-0457) is a pan-Aurora inhibitor, mostly against Aurora A with Kiapp of 0.6 nM, less potent towards Aurora B/Aurora C and 100-fold more selective for Aurora A than 55 other kinases. Phase 2.	464.59	639089-54-6	C23H28N8OS	Free Base	http://www.selleckchem.com/products/VX-680(MK-0457).html	S1048
MLN8054	Aurora Kinase	Others	MLN8054 is a potent and selective inhibitor of Aurora A with IC50 of 4 nM. It is more than 40-fold selective for Aurora A than Aurora B. Phase 1.	476.86	869363-13-3	C25H15ClF2N4O2	Free Base	http://www.selleckchem.com/products/MLN8054.html	S1100
ZM 447439	Aurora Kinase	Others	ZM 447439 is a selective and ATP-competitive inhibitor for Aurora A and Aurora B with IC50 of 110 nM and 130 nM, respectively. It is more than 8-fold selective for Aurora A/B than MEK1, Src, Lck and has little effect againstCDK1/2/4, Plk1, Chk1, etc.	513.59	331771-20-1	C29H31N5O4	Free Base	http://www.selleckchem.com/products/ZM-447439.html	S1103
SNS-314 Mesylate	Aurora Kinase	Others	SNS-314 Mesylate is a potent and selective inhibitor of Aurora A, Aurora B and Aurora C with IC50 of 9 nM, 31 nM, and 3 nM, respectively. It is less potent to Trk A/B, Flt4, Fms, Axl, c-Raf and DDR2. Phase 1.	527.04	1146618-41-8	C19H19ClN6O4S3	Mesylate	http://www.selleckchem.com/products/SNS-314.html	S1154
ENMD-2076 L-(+)-Tartaric acid	Aurora Kinase,FLT3,VEGFR	Angiogenesis	ENMD-2076 L-(+)-Tartaric acid is the tartaric acid of ENMD-2076, selective activity against Aurora A and Flt3 with IC50 of 14 nM and 1.86 nM, 25-fold more selective for Aurora A than Aurora B and less potent to VEGFR2/KDR and VEGFR3, FGFR1 and FGFR2 and PDGFRα. Phase 2.	525.56	1291074-87-7	C25H31N7O6	Free Base	http://selleckchem.com/products/enmd-2076-l-tartaric-acid.html	S2018
PIK-III	Autophagy	Autophagy	PIK-III, which is a selective inhibitor of ​VPS34 enzymatic activity, inhibits autophagy and de novo lipidation of LC3 and leads to the stabilization of autophagy substrates.	319.36	1383716-40-2	C17H17N7	Free Base	http://selleckchem.com/products/pik-iii.html	S7683
SBI-0206965	Autophagy	Autophagy	SBI-0206965 is a highly selective autophagy kinase <b>ULK1</b> inhibitor with <b>IC50</b> of 108 nM, about 7-fold selectivity over ULK2.	489.32	NA	C21H21BrN4O5	Free Base	http://www.selleckchem.com/products/sbi-0206965.html	S7885
Spautin-1	Autophagy	Autophagy	Spautin-1 is a potent and specific <b>autophagy</b> inhibitor, and inhibits the deubiquitinating activity of <b>USP10</b> and <b>USP13</b> with <b>IC50</b> of ∼0.6-0.7 μM.	271.26	1262888-28-7	C15H11F2N3	Free Base	http://www.selleckchem.com/products/spautin-1.html	S7888
LDC1267	Axl	Protein Tyrosine Kinase	LDC1267 is a highly selective <b>TAM kinase</b> inhibitor with <b>IC50</b> of <5 nM, 8 nM, and 29 nM for Mer, Tyro3, and Axl, respectively. Displays lower activity against Met, Aurora B, Lck, Src, and CDK8.	560.55	1361030-48-9	C30H26F2N4O5	Free Base	http://www.selleckchem.com/products/ldc1267.html	S7638
ABT-263 (Navitoclax)	Bcl-2	Apoptosis	ABT-263 (Navitoclax) is a potent inhibitor of Bcl-xL, Bcl-2 and Bcl-w with Ki of ≤ 0.5 nM, ≤1 nM and ≤1 nM, but binds more weakly to Mcl-1 and A1. Phase 1/2.	974.61	923564-51-6	C47H55ClF3N5O6S3	Free Base	http://www.selleckchem.com/products/ABT-263.html	S1001
AT101	Bcl-2	Apoptosis	AT101, the R-(-) enantiomer of Gossypol acetic acid, binds with Bcl-2, Bcl-xL and Mcl-1 with Ki of 0.32 μM, 0.48 μM and 0.18 μM; does not inhibit BIR3 domain and BID. Phase 1/2.	578.61	866541-93-7	C32H34O10	Free Base	http://www.selleckchem.com/products/at101.html	S2812
UMI-77	Bcl-2	Apoptosis	UMI-77 is a selective <b>Mcl-1</b> inhibitor with <b>K</sub>i</sub></b> of 490 nM, showing selectivity over other members of Bcl-2 family.	468.34	518303-20-3	C18H14BrNO5S2	Free Base	http://www.selleckchem.com/products/umi-77.html	S7531
ABT-199 (GDC-0199)	Bcl-2	Apoptosis	ABT-199 (GDC-0199) is a Bcl-2-selective inhibitor with Ki of <0.01 nM, >4800-fold more selective versus Bcl-xL and Bcl-w, and no activity to Mcl-1. Phase 2.	868.44	1257044-40-8	C45H50ClN7O7S	Free Base	http://www.selleckchem.com/products/abt-199.html	S8048
HA14-1	Bcl-2	Neuronal Signaling	HA14-1 is a non-peptidic ligand of a Bcl-2 surface pocket with IC50 of ~9 μM.	409.23	65673-63-4	C17H17BrN2O5	Free Base	http://www.selleckchem.com/products/HA14-1.html	S1071
Nilotinib (AMN-107)	Bcr-Abl	Angiogenesis	Nilotinib (AMN-107) is a Bcr-Abl inhibitor with IC50 less than 30 nM.	529.52	641571-10-0	C28H22F3N7O	Free Base	http://www.selleckchem.com/products/Nilotinib.html	S1033
DCC-2036 (Rebastinib)	Bcr-Abl	Angiogenesis	DCC-2036 is a conformational control Bcr-Abl inhibitor for Abl1(WT) and Abl1(T315I) with IC50 of 0.8 nM and 4 nM, also inhibits SRC, LYN, FGR, HCK, KDR, FLT3, and Tie-2, and low activity to seen towards c-Kit. Phase 1/2.	553.59	1020172-07-9	C30H28FN7O3	Free Base	http://www.selleckchem.com/products/dcc-2036.html	S2634
GNF-2	Bcr-Abl	Angiogenesis	GNF-2 is a highly selective non-ATP competitive inhibitor of Bcr-Abl, shows no activity to Flt3-ITD, Tel-PDGFR, TPR-MET and Tel-JAK1 transformed tumor cells.	374.32	778270-11-4	C18H13F3N4O2	Free Base	http://www.selleckchem.com/products/gnf-2.html	S2899
GNF-5	Bcr-Abl	Angiogenesis	GNF-5 is a selective and allosteric Bcr-Abl inhibitor with IC50 of 220 nM.	418.37	778277-15-9	C20H17F3N4O3	Free Base	http://www.selleckchem.com/products/gnf-5.html	S7526
Radotinib	Bcr-Abl	Angiogenesis	Radotinib is a selective BCR-ABL1 tyrosine kinase inhibitor with IC50 of 34 nM, used to treat Chronic Myeloid Leukemia.	530.50	926037-48-1	C27H21F3N8O	Free Base	http://selleckchem.com/products/radotinib.html	S8134
(+)-JQ1	BET	Epigenetics	(+)-JQ1 is a BET bromodomain inhibitor, with IC50 of 77 nM/33 nM for BRD4(1/2), binding to all bromodomains of the BET family, but not to bromodomains outside the BET family.	456.99	1268524-70-4	C23H25ClN4O2S	Free Base	http://www.selleckchem.com/products/jq1.html	S7110
OTX015	BET	Epigenetics	OTX015 is a potent BET bromodomain inhibitor with EC50 ranging from 10 to 19 nM for BRD2, BRD3, and BRD4. Phase 1.	491.99	202590-98-5	C25H22ClN5O2S	Free Base	http://www.selleckchem.com/products/otx015.html	S7360
EUK 134	Beta Amyloid	Neuronal Signaling	EUK 134, a synthetic superoxide dismutase (SOD)/catalase mimetic, exhibits potent antioxidant activities, and inhibits the formation of β-amyloid and related amyloid fibril.	416.74	81065-76-1	C18H18ClMnN2O4	Free Base	http://www.selleckchem.com/products/euk-134.html	S4261
CGI1746	BTK	Angiogenesis	CGI1746 is a potent and highly selective small-molecule inhibitor of the Btk with IC50 of 1.9 nM.	579.69	910232-84-7	C34H37N5O4	Free Base	http://www.selleckchem.com/products/cgi1746.html	S7051
RN486	BTK	Angiogenesis	RN486 is a potent and selective <b>BTK</b> inhibitor with <b>IC50</b> of 4 nM.	606.69	1242156-23-5	C35H35FN6O3	Free Base	http://www.selleckchem.com/products/rn486.html	S7080
AVL-292	BTK	Angiogenesis	AVL-292 is a covalent, orally active, and highly selective BTK inhibitor with IC50 of <0.5 nM, displaying at least 1400-fold selectivity over the other kinases assayed. Phase 1.	423.44	1202757-89-8	C22H22FN5O3	Free Base	http://www.selleckchem.com/products/avl-292.html	S7173
CNX-774	BTK	Angiogenesis	CNX-774 is an irreversible, orally active, and highly selective BTK inhibitor with IC50 of <1 nM.	499.5	1202759-32-7	C26H22FN7O3	Free Base	http://www.selleckchem.com/products/cnx-774.html	S7257
LFM-A13	BTK	Angiogenesis	LFM-A13 is a specific Bruton's tyrosine kinase (<b>BTK</b>) inhibitor with <b>IC50</b> of 2.5 μM, >100-fold selectivity over other protein kinases including JAK1, JAK2, HCK, EGFR,and IRK.	360	244240-24-2	C11H8Br2N2O2	Free Base	http://www.selleckchem.com/products/lfm-a13.html	S7734
ONO-4059	BTK	Angiogenesis	ONO-4059 is a highly potent and selective oral <b>BTK</b> inhibitor with <b>IC50</b> of 23.9 nM. Phase 1.	456.50	1351635-67-0	C25H24N6O3	Free Base	http://www.selleckchem.com/products/ono-4059.html	S7877
ACP-196	BTK	Angiogenesis	Acalabrutinib is a selective second-generation Bruton’s tyrosine kinase (BTK) inhibitor, which prevents the activation of the B-cell antigen receptor (BCR) signaling pathway.	465.51	1420477-60-6	C26H23N7O2	Free Base	http://selleckchem.com/products/acalabrutinib.html	S8116
SU11274	c-Met	Neuronal Signaling	SU11274 is a selective Met inhibitor with IC50 of 10 nM, no effects on PGDFRβ, EGFR or Tie2.	568.09	658084-23-2	C28H30ClN5O4S	Free Base	http://www.selleckchem.com/products/SU11274.html	S1080
PHA-665752	c-Met	Others	PHA-665752 is a potent, selective and ATP-competitive c-Met inhibitor with IC50 of 9 nM, >50-fold selectivity for c-Met than RTKs or STKs.	641.61	477575-56-7	C32H34Cl2N4O4S	Free Base	http://www.selleckchem.com/products/PHA-665752.html	S1070
PF-04217903	c-Met	Others	PF-04217903 is a selective ATP-competitive c-Met inhibitor with IC50 of 4.8 nM, susceptible to oncogenic mutations (no activity to Y1230C mutant). Phase 1.	372.38	956905-27-4	C19H16N8O	Free Base	http://www.selleckchem.com/products/PF-04217903.html	S1094
Tepotinib (EMD 1214063)	c-Met	Protein Tyrosine Kinase	Tepotinib (EMD 1214063) is a potent and selective <b>c-Met</b> inhibitor with <b>IC50</b> of 4 nM, >200-fold selective for c-Met than IRAK4, TrkA, Axl, IRAK1, and Mer. Phase 1.	492.57	1100598-32-0	C29H28N6O2	Free Base	http://www.selleckchem.com/products/emd-1214063.html	S7067
AMG 337	c-Met	Protein Tyrosine Kinase	AMG 337 is an oral, small molecule, ATP-competitive, highly selective inhibitor of the MET receptor.	463.46	1173699-31-4	C23H22FN7O3	Free Base	http://selleckchem.com/products/amg-337.html	S8167
Amlodipine	Calcium Channel	Transmembrane Transporters	Amlodipine(Norvasc) is a long-acting calcium channel blocker with an IC50 of 1.9 nM.	408.88	88150-42-9	C20H25ClN2O5	Free Base	http://www.selleckchem.com/products/Amlodipine(Norvasc).html	S1905
Nilvadipine	Calcium Channel	Transmembrane Transporters	Nilvadipine is a potent calcium channel blocker with an IC50 of 0.03 nM.	385.37	75530-68-6	C19H19N3O6	Free Base	http://www.selleckchem.com/products/nilvadipine-arc029.html	S2721
Bay K 8644	Calcium Channel	Transmembrane Transporters	Bay K 8644 is a potent, selective activator of L-type Ca2+ channel with IC50 of 17.3 nM.	356.30	71145-03-4	C16H15F3N2O4	Free Base	http://selleckchem.com/products/bay-k-8644.html	S7924
Forskolin	cAMP	GPCR & G Protein	Forskolin is a ubiquitous activator of eukaryotic adenylyl cyclase (AC), commonly used to raise levels of cAMP in the study and research of cell physiology.	410.5	66575-29-9	C22H34O7	Free Base	http://www.selleckchem.com/products/forskolin.html	S2449
Org 27569	Cannabinoid Receptor	GPCR & G Protein	Org 27569 is an allosteric modulator of cannabinoid CB1 receptor, induces a CB1 receptor state that is characterized by enhanced agonist affinity and decreased inverse agonist affinity.	409.95	868273-06-7	C24H28ClN3O	Free Base	http://www.selleckchem.com/products/Org-27569.html	S1534
AM1241	Cannabinoid Receptor	GPCR & G Protein	AM-1241 is a selective cannabinoid CB2 receptor agonist with Ki of 3.4 nM, exhibits 82-fold selectivity over CB1 receptor.	503.33	444912-48-5	C22H22IN3O3	Free Base	http://www.selleckchem.com/products/AM-1241.html	S1544
BML-190	Cannabinoid Receptor	GPCR & G Protein	BML-190 is a selective cannabinoid CB2 receptor inverse agonist with Ki of 435 nM, with 50-fold selectivity over CB1 receptor.	426.89	2854-32-2	C23H23ClN2O4	Free Base	http://www.selleckchem.com/products/bml-190.html	S2854
Rimonabant	Cannabinoid Receptor	GPCR & G Protein	Rimonabant is a selective antagonist of CB1 with IC50 of 13.6 nM and EC50 of 17.3 nM in hCB1 transfected HEK 293 membrane.	463.79	168273-06-1	C22H21Cl3N4O	Free Base	http://www.selleckchem.com/products/rimonabant-sr141716.html	S3021
Otenabant (CP-945598) HCl	Cannabinoid Receptor	GPCR & G Protein	Otenabant (CP-945598) HCl is a potent and selective cannabinoid receptor CB1 antagonist with Ki of 0.7 nM, exhibits 10,000-fold greater selectivity against human CB2 receptor. Phase 1.	546.88	686347-12-6	C25H26Cl3N7O	HCl	http://selleckchem.com/products/cp-945598-hcl.html	S8012
Tioxolone	Carbonic Anhydrase	Metabolism	Tioxolone is a metalloenzyme carbonic anhydrase I inhibitor with a Ki of 91 nM.	168.17	4991-65-5	C7H4O3S	Free Base	http://www.selleckchem.com/products/tioxolone.html	S2603
U-104	Carbonic Anhydrase	Metabolism	U-104 is a potent carbonic anhydrase (CA) inhibitor for CA IX and CA XII with Ki of 45.1 nM and 4.5 nM, respectively, very low inhibition for CA I and CA II.	309.32	178606-66-1	C13H12FN3O3S	Free Base	http://www.selleckchem.com/products/u-104.html	S2866
Brinzolamide	Carbonic Anhydrase	Metabolism	Brinzolamide is a potent carbonic anhydrase II inhibitor with IC50 of 3.19 nM.	383.51	138890-62-7	C12H21N3O5S3	Free Base	http://www.selleckchem.com/products/brinzolamide.html	S3178
VX-765	Caspase	Apoptosis	VX-765 is a potent and selective inhibitor of caspase-1 with Ki of 0.8 nM.	509	273404-37-8	C24H33ClN4O6	Free Base	http://www.selleckchem.com/products/VX-765.html	S2228
PAC-1	Caspase	Apoptosis	PAC-1 is a potent procaspase-3 activator with EC50 of 0.22 μM and the first small molecule known to directly activate procaspase-3 to caspase-3.	392.49	315183-21-2	C23H28N4O2	Free Base	http://www.selleckchem.com/products/pac-1.html	S2738
Apoptosis Activator 2	Caspase	Apoptosis	Apoptosis Activator 2 strongly induces caspase-3 activation, PARP cleavage, and DNA fragmentation which leads to the destruction of cells (Apaf-1 dependent) with IC50 of ~4 μM, inactive to HMEC, PREC, or MCF-10A cells.	306.14	79183-19-0	C15H9Cl2NO2	Free Base	http://www.selleckchem.com/products/apoptosis-activator-2.html	S2927
Birinapant	Caspase	Apoptosis	Birinapant is a SMAC mimetic antagonist, mostly to cIAP1 with Kd of <1 nM, less potent to XIAP. Phase 1/2.	806.94	1260251-31-7	C42H56F2N8O6	Free Base	http://www.selleckchem.com/products/birinapant-tl32711.html	S7015
Selonsertib (GS-4997)	caspase	Apoptosis	GS-4997 is a highly selective and potent once-daily oral ASK1 inhibitor with potential anti-inflammatory, antineoplastic and anti-fibrotic activities.	445.49	1448428-04-3	C24H24FN7O	Free Base	http://selleckchem.com/products/selonsertib-gs-4997.html	S8292
Cinacalcet HCl	CaSR	GPCR & G Protein	AMG-073 represents a new class of compounds for the treatment of hyperparathyroidism.	393.87	364782-34-3	C22H23ClF3N	Hydrochloride	http://www.selleckchem.com/products/Cinacalcet-hydrochloride.html	S1260
NPS-2143	CaSR	GPCR & G Protein	NPS 2143 is a novel potent and selective antagonist of Ca(2+) receptor with IC50 of 43 nM.	408.92	284035-33-2	C24H25ClN2O2	Free Base	http://www.selleckchem.com/products/nps-2143.html	S2633
Odanacatib (MK-0822)	Cathepsin K	Others	Odanacatib (MK 0822) is a potent, selective, and neutral inhibitor of cathepsin K (human/rabbit) with IC50 of 0.2 nM/1 nM, and demonstrated high selectivity versus off-target cathepsin B, L, S. Phase 3.	525.56	603139-19-1	C25H27F4N3O3S	Free Base	http://www.selleckchem.com/products/Odanacatib-(MK0822).html	S1115
Maraviroc	CCR5	Microbiology	Maraviroc is a CCR5 antagonist for MIP-1α, MIP-1β and RANTES with IC50 of 3.3 nM, 7.2 nM and 5.2 nM, respectively.	513.67	376348-65-1	C29H41F2N5O	Free Base	http://www.selleckchem.com/products/Maraviroc.html	S2003
ZCL278	Cdc42 GTPase	Cell Cycle	ZCL278 is a selective Cdc42 GTPase inhibitor with Kd of 11.4 μM.	584.89	587841-73-4	C21H19BrClN5O4S2	Free Base	http://www.selleckchem.com/products/zcl278.html	S7293
PHA-793887	CDK	Cell Cycle	PHA-793887 is a novel and potent inhibitor of CDK2, CDK5 and CDK7 with IC50 of 8 nM, 5 nM and 10 nM. It is greater than 6-fold more selective for CDK2, 5, and 7 than CDK1, 4, and 9. Phase 1.	361.48	718630-59-2	C19H31N5O2	Free Base	http://www.selleckchem.com/products/PHA-793887.html	S1487
LDC000067	CDK	Cell Cycle	LDC000067 is a highly selective CDK9 inhibitor with IC50 of 44 nM, 55/125/210/ >227/ >227-fold selectivity over CDK2/1/4/6/7.	370.43	1073485-20-7	C18H18N4O3S	Free Base	http://www.selleckchem.com/products/ldc000067.html	S7461
Palbociclib (PD0332991) Isethionate	CDK	Cell Cycle	Palbociclib (PD0332991) Isethionate is a highly selective inhibitor of CDK4/6 with IC50 of 11 nM/16 nM in cell-free assays. It shows no activity against CDK1/2/5, EGFR, FGFR, PDGFR, InsR, etc. Phase 3.	573.66	827022-33-3	C26H35N7O6S		http://selleckchem.com/products/pd-0332991-palbociclib-isethionate.html	S1579
XL413 (BMS-863233)	CDK	Cell Cycle	XL413 (BMS-863233) is a potent and selective cell division cycle 7 homolog (CDC7) kinase inhibitor with IC50 of 3.4 nM, showing 63-, 12- and 35-fold selectivity over CK2, Pim-1 and pMCM2, respectively. Phase 1/2.	326.18	1169562-71-3	C14H13Cl2N3O2	Free Base	http://selleckchem.com/products/xl413-bms-863233.html	S7547
SNS-032 (BMS-387032)	CDK	Others	SNS-032 has firstly been described as a selective inhibitor of CDK2 with IC50 of 48 nM and is 10- and 20-fold selective over CDK1/CDK4. It is also found to be sensitive to CDK7/9 with IC50 of 62 nM/4 nM, with little effect on CDK6. Phase 1.	380.53	345627-80-7	C17H24N4O2S2	Free Base	http://www.selleckchem.com/products/SNS-032.html	S1145
Palbociclib (PD-0332991) HCl	CDK	Others	PD0332991 is a highly selective inhibitor of CDK4/6 with IC50 of 11 nM/16 nM. It shows no activity against CDK1/2/5, EGFR, FGFR, PDGFR, InsR, etc. Phase 2/3.	483.99	827022-32-2, 571190-30-2 (free base)	C24H30ClN7O2	HCl	http://www.selleckchem.com/products/PD-0332991.html	S1116
Anacetrapib (MK-0859)	CETP	Metabolism	Anacetrapib (MK0859) is a potent, selective, reversible rhCETP and mutant CETP(C13S) inhibitor with IC50 of 7.9 nM and 11.8 nM, increases HDL-C and decreases LDL-C, does not increase aldosterone or blood pressure. Phase 3.	637.51	875446-37-0	C30H25F10NO3	Free Base	http://selleckchem.com/products/anacetrapib-mk-0859.html	S2748
Dalcetrapib (JTT-705, RO4607381)	CETP	Metabolism	Dalcetrapib (JTT-705) is a rhCETP inhibitor with IC50 of 0.2 μM that increases the plasma HDL cholesterol. Phase 3.	389.59	211513-37-0	C23H35NO2S	Free Base	http://www.selleckchem.com/products/dalcetrapib-jtt-705.html	S2772
Torcetrapib	CETP	Metabolism	Torcetrapib is a CETP inhibitor with IC50 of 37 nM, elevates HDL-C and reduces nonHDL-C in plasma. Phase 3.	600.47	262352-17-0	C26H25F9N2O4	Free Base	http://www.selleckchem.com/products/torcetrapib-cp-529414.html	S2792
Ivacaftor (VX-770)	CFTR	Others	Ivacaftor (VX-770) is a potentiator of CFTR targeting G551D-CFTR and F508del-CFTR with EC50 of 100 nM and 25 nM, respectively.	392.49	873054-44-5	C24H28N2O3	Free Base	http://www.selleckchem.com/products/VX-770.html	S1144
GlyH-101	CFTR	Transmembrane Transporters	GlyH-101 is a selective and reversible CFTR inhibitor with Ki of 4.3 μM.	493.15	328541-79-3	C19H15Br2N3O3	Free Base	http://selleckchem.com/products/glyh-101.html	S8094
AZD7762	Chk	Cell Cycle	AZD7762 is a potent and selective inhibitor of Chk1 with IC50 of 5 nM. It is equally potent against Chk2 and less potent against CAM, Yes, Fyn, Lyn, Hck and Lck. Phase 1.	362.42	860352-01-8	C17H19FN4O2S	Free Base	http://www.selleckchem.com/products/AZD7762.html	S1532
LY2603618	Chk	Cell Cycle	LY2603618 is a selective Chk1 inhibitor with potential anti-tumor activity.	436.3	911222-45-2	C18H22BrN5O3	Free Base	http://www.selleckchem.com/products/LY2603618-IC-83.html	S2626
CHIR-124	Chk	Cell Cycle	CHIR-124 is a novel and potent Chk1 inhibitor with IC50 of 0.3 nM. It shows 2,000-fold selectivity against Chk2, 500- to 5,000-fold less activity against CDK2/4 and Cdc2.	419.91	405168-58-3	C23H22ClN5O	Free Base	http://www.selleckchem.com/products/chir-124.html	S2683
Celecoxib	COX	Neuronal Signaling	Celecoxib is a selective COX-2 inhibitor with IC50 of 40 nM.	381.37	169590-42-5	C17H14F3N3O2S	Free Base	http://www.selleckchem.com/products/Celecoxib.html	S1261
Etodolac	COX	Neuronal Signaling	Etodolac (Lodine) is a COX inhibitor with an IC50 of 53.5 nM.	287.35	41340-25-4	C17H21NO3	Free Base	http://www.selleckchem.com/products/Etodolac.html	S1328
Naproxen	COX	Neuronal Signaling	Naproxen is a COX inhibitor for COX-1 and COX-2 with IC50 of 8.7 μM and 5.2 μM, respectively.	252.24	26159-34-2	C14H13NaO3	Sodium	http://www.selleckchem.com/products/Naproxen-Sodium(Aleve).html	S1626
Etoricoxib	COX	Neuronal Signaling	Etoricoxib is a new COX-2 selective inhibitor with anti-inflammatory, antipyretic, analgesic, and potential antineoplastic properties.	358.84	202409-33-4	C18H15ClN2O2S	Free Base	http://selleckchem.com/products/etoricoxib.html	S4651
Parecoxib	COX	Neuronal Signaling	Parecoxib is a selective COX2 inhibitor.	370.42	198470-84-7	C19H18N2O4S	Free Base	http://selleckchem.com/products/parecoxib.html	S4656
KPT-185	CRM1	Transmembrane Transporters	KPT-185 is a selective CRM1 inhibitor.	355.31	1333151-73-7	C16H16F3N3O3	Free Base	http://www.selleckchem.com/products/kpt-185.html	S7125
KPT-276	CRM1	Transmembrane Transporters	KPT-276 is an orally bioavailable selective CRM1 inhibitor.	426.26	1421919-75-6	C16H10F8N4O	Free Base	http://www.selleckchem.com/products/kpt-276.html	S7251
KPT-330	CRM1	Transmembrane Transporters	KPT-330 is an orally bioavailable selective CRM1 inhibitor.	443.31	1393477-72-9	C17H11F6N7O	Free Base	http://www.selleckchem.com/products/kpt-330.html	S7252
BLZ945	CSF-1R	Protein Tyrosine Kinase	BLZ945 is an orally active, potent and selective <b>CSF-1R</b> inhibitor with <b>IC50</b> of 1 nM, >1000-fold selective against its closest receptor tyrosine kinase homologs.	398.48	953769-46-5	C20H22N4O3S	Free Base	http://www.selleckchem.com/products/blz945.html	S7725
GW2580	CSF-1R	Protein Tyrosine Kinase	GW2580 is a selective CSF-1R inhibitor for c-FMS with IC50 of 30 nM, 150- to 500-fold selective compared to b-Raf, CDK4, c-KIT, c-SRC, EGFR, ERBB2/4, ERK2, FLT-3, GSK3, ITK, JAK2 etc.	366.41	870483-87-7	C20H22N4O3	Free Base	http://www.selleckchem.com/products/gw2580.html	S8042
WZ811	CXCR	GPCR & G Protein	WZ811 is a highly potent competitive CXCR4 antagonist with EC50 of 0.3 nM.	290.36	55778-02-4	C18H18N4	Free Base	http://www.selleckchem.com/products/wz-811.html	S2912
SB225002	CXCR	GPCR & G Protein	SB225002 is a potent, and selective <b>CXCR2</b> antagonist with <b>IC50</b> of 22 nM for inhibiting interleukin IL-8 binding to CXCR2, > 150-fold selectivity over the other 7-TMRs tested.	352.14	182498-32-4	C13H10BrN3O4	Free Base	http://www.selleckchem.com/products/sb225002.html	S7651
E-64	Cysteine Protease	Proteases	E-64 is an irreversible and selective cysteine protease inhibitor with IC50 of 9 nM for papain.	357.41	66701-25-5	C15H27N5O5	Free Base	http://www.selleckchem.com/products/e-64.html	S7379
Loxistatin Acid (E-64C)	Cysteine Protease	Proteases	Loxistatin Acid (E-64C), a derivative of E-64, is an irreversible and membrane-permeant cysteine protease inhibitor.	314.38	76684-89-4	C15H26N2O5	Free Base	http://www.selleckchem.com/products/loxistatin-acid-e-64c.html	S7392
Aloxistatin	Cysteine Protease	Proteases	Aloxistatin is an irreversible and membrane-permeable cysteine protease inhibitor.	342.43	88321-09-9	C17H30N2O5	Free Base	http://www.selleckchem.com/products/Aloxistatin.html	S7393
PD 151746	Cysteine Protease	Proteases	PD 151746 is a selective, cell-permeable calpain inhibitor with Ki of 0.26 μM for μ-Calpain, about 20-fold selectivity over m-calpain.	237.25	179461-52-0	C11H8FNO2S	Free Base	http://www.selleckchem.com/products/pd-151746.html	S7424
DDR1-IN-1	DDR(receptor tyrosine kinase)	Others	DDR1-IN-1 is a potent and selective <b>discoidin domain receptor 1 (DDR1)</b> receptor tyrosine kinase inhibitor with <b>IC50</b> of 105 nM, about 3-fold selectivity over DDR2.	552.59	1449685-96-4	C30H31F3N4O3	Free Base	http://www.selleckchem.com/products/ddr1-in-1.html	S7498
AGI-5198	Dehydrogenase	Metabolism	AGI-5198 is the first highly potent and selective inhibitor of IDH1 R132H/R132C mutants with IC50 of 0.07 μM/0.16 μM.	462.56	1355326-35-0	C27H31FN4O2	Free Base	http://www.selleckchem.com/products/agi-5198.html	S7185
AGI-6780	Dehydrogenase	Metabolism	AGI-6780 is a potent and selective inhibitor of IDH2 R140Q mutant with IC50 of 23 nM.	481.51	1432660-47-3	C21H18F3N3O3S2	Free Base	http://www.selleckchem.com/products/agi-6780.html	S7241
SW033291	Dehydrogenase	Metabolism	SW033291 is a selective inhibitor of 15-hydroxyprostaglandin dehydrogenase (15-PGDH) with IC50 and Kiapp of 1.5 nM and 0.1 nM, respectively.	412.59	459147-39-8	C21H20N2OS3	Free Base	http://selleckchem.com/products/sw033291.html	S7900
NCT-501	Dehydrogenase	Metabolism	NCT-501 is a potent and selective inhibitor of Aldehyde Dehydrogenase 1A1 (ALDH1A1) with IC50 of 40 nM.	416.52	1802088-50-1	C21H32N6O3	Free Base	http://selleckchem.com/products/nct-501.html	S7941
PluriSIn #1 (NSC 14613)	Dehydrogenase	Metabolism	PluriSIn #1 is an inhibitor of the stearoyl-coA desaturase 1 (SCD1), which is able to selectively eliminate hPSCs.	213.24	91396-88-2	C12H11N3O	Free Base	http://www.selleckchem.com/products/PluriSIn-1-nsc-14613.html	S8076
AG-221 (Enasidenib)	Dehydrogenase	Metabolism	Enasidenib is a first-in-class, oral, potent, reversible, selective inhibitor of the IDH2 mutant enzyme.	473.38	1446502-11-9	C19H17F6N7O	Free Base	http://selleckchem.com/products/ag-221-enasidenib.html	S8205
Methotrexate	DHFR	Metabolism	Methotrexate is an antimetabolite and antifolate drug, which acts by inhibiting the metabolism of folic acid.	454.44	59-05-2	C20H22N8O5	Free Base	http://www.selleckchem.com/products/Abitrexate.html	S1210
Pralatrexate	DHFR	Metabolism	Pralatrexate(Folotyn) is an antifolate, and structurally a folate analog. Its IC50 is < 300 nM in some cell lines.	477.47	146464-95-1	C23H23N7O5	Free Base	http://www.selleckchem.com/products/Pralatrexate(Folotyn).html	S1497
Zebularine	DNA Methyltransferase	Epigenetics	Zebularine is a DNA methylation inhibitor that forms a covalent complex with DNA methyltransferases, also inhibits cytidinedeaminase with Ki of 2 μM.	228.2	3690-10-6	C9H12N2O5	Free Base	https://www.selleckchem.com/products/zebularine.html	S7113
SGI-1027	DNA Methyltransferase	Epigenetics	SGI-1027 is a DNMT inhibitor with IC50 of 6, 8, 7.5 μM for DNMT1, DNMT3A, and DNMT3B	461.52	1020149-73-8	C27H23N7O	Free Base	http://www.selleckchem.com/products/sgi-1027.html	S7276
Lomeguatrib	DNA Methyltransferase	Epigenetics	Lomeguatrib is a potent inhibitor of O6-alkylguanine-DNA-alkyltransferase with IC50 of 5 nM.	326.17	192441-08-0	C10H8BrN5OS	Free Base	http://www.selleckchem.com/products/lomeguatrib.html	S8056
E3330	DNA/RNA Synthesis	DNA Damage	E3330 is a potent and selective <b>APE1(Ref-1)</b> inhibitor, which suppressed NF-kappa B DNA-binding activity.	378.46	136164-66-4	C21H30O6	Free Base	http://www.selleckchem.com/products/e3330.html	S7445
CRT0044876	DNA/RNA Synthesis	DNA Damage	CRT0044876 is a potent and selective APE1 inhibitor with IC50 of ~3 μM.	206.15	6960-45-8	C9H6N2O4	Free Base	http://www.selleckchem.com/products/crt0044876.html	S7449
SCR7	DNA/RNA Synthesis	DNA Damage	SCR7 is a specific DNA Ligase IV inhibitor, which blocks nonhomologous end-joining (NHEJ).	332.38	14892-97-8	C18H12N4OS	Free Base	http://www.selleckchem.com/products/scr7.html	S7742
Favipiravir (T-705)	DNA/RNA Synthesis	DNA Damage	Favipiravir (T-705) is a potent and selective <b>RNA-dependent RNA polymerase</b> inhibitor, used to treat influenza virus infections.	157.1	259793-96-9	C5H4FN3O2	Free Base	http://www.selleckchem.com/products/favipiravir-t-705.html	S7975
Mizoribine	DNA/RNA Synthesis	DNA Damage	Mizoribine is an imidazole nucleoside, selectively inhibits inosine monophosphate synthetase and guanosine monophosphate synthetase.	259.22	50924-49-7	C9H13N3O6	Free Base	http://selleckchem.com/products/Mizoribine.html	S1384
Levosulpiride	Dopamine Receptor	Neuronal Signaling	Levosulpiride is a selective antagonist for D2 dopamine receptors used as an antipsychotic and prokinetic agent.	341.43	23672-07-3	C15H23N3O4S	Free Base	http://www.selleckchem.com/products/levosulpiride-levogastrol.html	S2104
PD128907 HCl	Dopamine Receptor	Neuronal Signaling	PD 128907 HCl is a potent and selective dopamine D3 receptor agonist, with EC50 of 0.64 nM, exhibits 53-fold selectivity over dopamine D2 receptor.	285.77	112960-16-4	C14H20ClNO3	Salt	http://www.selleckchem.com/products/PD-128907.html	S2168
Rotundine	Dopamine Receptor	Neuronal Signaling	Rotundine (L-tetrahydropalmatine, L-THP) is a selective dopamine D1 receptor antagonist with IC50 of 166 nM.	355.43	483-14-7	C21H25NO4	Free Base	http://www.selleckchem.com/products/rotundine.html	S2437
Pramipexole	Dopamine Receptor	Neuronal Signaling	Pramipexole is a partial/full D2S, D2L, D3, D4 receptor agonist with a Ki of 3.9, 2.2, 0.5 and 5.1 nM for D2S, D2L, D3, D4 receptor, respectively.	211.33	104632-26-0	C10H17N3S	Free Base	http://www.selleckchem.com/products/Pramipexole-Mirapex.html	S2460
MetoclopraMide HCl	Dopamine Receptor	Neuronal Signaling	MetoclopraMide HCl is a selective dopamine D2 receptor antagonist, used for the treatment of nausea and vomiting.	336.26	7232-21-5	C14H23Cl2N3O2	Salt	http://www.selleckchem.com/products/metoclopramide-hcl.html	S4289
Fenoldopam (mesylate)	Dopamine Receptor	Neuronal Signaling	Fenoldopam is a selective dopamine-1 receptor (DA1) agonist with natriuretic/diuretic properties. It lowers blood pressure through arteriolar vasodilation.	401.86	67227-57-0	C17H20ClNO6S	methanesulfonat	http://selleckchem.com/products/fenoldopam-mesylate.html	S4618
Linagliptin	DPP-4	Proteases	Linagliptin is a highly potent, selective DPP-4 inhibitor with IC50 of 1 nM.	472.54	668270-12-0	C25H28N8O2	Free Base	http://www.selleckchem.com/products/linagliptin-bi-1356.html	S3031
Vildagliptin (LAF-237)	DPP-4	Proteases	Vildagliptin (LAF-237) inhibits DPP−4 with IC50 of 2.3 nM.	303.4	274901-16-5	C17H25N3O2	Free Base	http://www.selleckchem.com/products/vildagliptin-laf-237.html	S3033
Saxagliptin hydrate	DPP-4	Proteases	Saxagliptin H2O is a selective and reversible DPP4 inhibitor with IC50 of 26 nM.	333.43	945667-22-1	C18H27N3O3	hydrate	http://selleckchem.com/products/saxagliptin-hydrate.html	S4697
Trelagliptin	DPP-4	Proteases	Trelagliptin is a highly selective, long-acting DPP-4 inhibitor. Phase 3.	357.38	865759-25-7	C18H20FN5O2	Free Base	http://www.selleckchem.com/products/trelagliptin.html	S7513
PR-619	DUB	Ubiquitin	PR-619 is a non-selective, reversible inhibitor of the deubiquitinylating enzymes (DUBs) with EC50 of 1-20 μM.	223.28	2645-32-1	C7H5N5S2	Free Base	http://www.selleckchem.com/products/pr-619.html	S7130
P22077	DUB	Ubiquitin	P22077 is an inhibitor of ubiquitin-specific protease USP7 with EC50 of 8.6 μM, also inhibits the closely related USP47.	315.32	1247819-59-5	C12H7F2NO3S2	Free Base	http://www.selleckchem.com/products/p22077.html	S7133
TCID	DUB	Ubiquitin	TCID is a DUB inhibitor for ubiquitin C-terminal hydrolase L3 with IC50 of 0.6 μM, 125-fold selective to L1.	283.92	30675-13-9	C9H2Cl4O2	Free Base	http://www.selleckchem.com/products/tcid.html	S7140
ML323	DUB	Ubiquitin	ML323 is a highly potent and selective USP1-UAF1 inhibitor with IC50 of 76 nM.	384.48	1572414-83-5	C23H24N6	Free Base	http://www.selleckchem.com/products/ml323.html	S7529
Mdivi-1	Dynamin	Cytoskeletal Signaling	Mdivi-1 is a selective cell-permeable inhibitor of mitochondrial division DRP1 (dynamin-related GTPase) and mitochondrial division Dynamin I (Dnm1) with IC50 of 1-10 μM.	353.22	338967-87-6	C15H10Cl2N2O2S	Free Base	http://www.selleckchem.com/products/mdivi-1.html	S7162
Dynasore	Dynamin	Others	Dynasore is a cell-permeable, reversible non-competitive dynamin inhibitor of GTPase activity of dynamin 1/2, with IC50 of 15 μM, also inhibits the mitochondrial dynamin Drp1, with no effect against other small GTPase.	322.31	304448-55-3	C18H14N2O4	Free Base	http://www.selleckchem.com/products/dynasore.html	S8047
PYR-41	E1 Activating	Ubiquitin	PYR-41 is the first cell-permeable inhibitor of ubiquitin-activating enzyme E1, with no activity at E2.	371.3	418805-02-4	C17H13N3O7	Free Base	http://www.selleckchem.com/products/pyr-41.html	S7129
NSC697923	E2 conjugating	Ubiquitin	NSC697923 is a cell-permeable and selective inhibitor of the Ub-conjugating enzyme (E2) complex Ubc13-Uev1A.	267.26	343351-67-7	C11H9NO5S	Free Base	http://www.selleckchem.com/products/nsc697923.html	S7142
WZ4002	EGFR	Protein Tyrosine Kinase	WZ4002 is a novel, mutant-selective EGFR inhibitor for EGFR(L858R)/(T790M) with IC50 of 2 nM/8 nM; does not inhibit ERBB2 phosphorylation (T798I).	494.18	1213269-23-8	C25H27ClN6O3	Free Base	http://www.selleckchem.com/products/WZ4002.html	S1173
OSI-420	EGFR	Protein Tyrosine Kinase	OSI-420 is the active metabolite of Erlotinib (EGFR inhibitor with IC50 of 2 nM).	415.87	183320-51-6	C21H22ClN3O4	Hydrochloride	http://www.selleckchem.com/products/OSI-420-Desmethyl-Erlotinib,CP-473420.html	S2205
Icotinib	EGFR	Protein Tyrosine Kinase	Icotinib is a potent and specific EGFR inhibitor with IC50 of 5 nM, including the EGFR, EGFR(L858R), EGFR(L861Q), EGFR(T790M) and EGFR(T790M, L858R). Phase 4.	391.42	610798-31-7	C22H21N3O4	Free Base	http://www.selleckchem.com/products/icotinib.html	S2922
CNX-2006	EGFR	Protein Tyrosine Kinase	CNX-2006 is a novel irreversible mutant-selective EGFR inhibitor with IC50 of < 20 nM, with very weak inhibition at wild-type EGFR.	545.53	1375465-09-0	C26H27F4N7O2	Free Base	http://www.selleckchem.com/products/cnx-2006.html	S7206
AZD9291	EGFR	Protein Tyrosine Kinase	AZD9291 is an oral, irreversible, and mutant-selective EGFR inhibitor with IC50 of 12.92, 11.44 and 493.8 nM for Exon 19 deletion EGFR, L858R/T790M EGFR, and WT EGFR, respectively. Phase 3.	499.61	1421373-65-0	C28H33N7O2	Free Base	http://www.selleckchem.com/products/azd9291.html	S7297
CL-387785 (EKI-785)	EGFR	Protein Tyrosine Kinase	CL-387785 (EKI-785) is an irreversible, and selective <b>EGFR</b> inhibitor with <b>IC50</b> of 370 pM.	381.23	194423-06-8	C18H13BrN4O	Free Base	http://www.selleckchem.com/products/cl-387785-eki-785.html	S7557
Sitaxentan sodium	Endothelin Receptor	GPCR & G Protein	Sitaxentan sodium is a selective endothelin A receptor (ETA) antagonist with IC50 and Ki of 1.4 nM and 0.43 nM, respectively, exhibits 7000-fold selectivity over ETB. Phase 3.	476.89	210421-74-2	C18H14ClN2NaO6S2	Free Base	http://selleckchem.com/products/sitaxentan-sodium-tbc-11251.html	S3034
BQ-123	Endothelin Receptor	GPCR & G Protein	BQ-123 is a selective <b>endothelin A receptor (ETA)</b> antagonist with <b>IC50</b> of 7.3 nM. Phase 2.	610.7	136553-81-6	C31H42N6O7	Free Base	http://www.selleckchem.com/products/bq-123.html	S7883
UNC669	Epigenetic Reader Domain	Epigenetics	UNC669 is a potent and selective MBT (malignant brain tumor) inhibitor with IC50 of 6 μM for L3MBTL1, 5- and 11-fold selective over L3MBTL3 and L3MBTL4.	338.24	1314241-44-5	C15H20BrN3O	Free Base	http://www.selleckchem.com/products/unc669.html	S7373
GSK1324726A (I-BET726)	Epigenetic Reader Domain	Epigenetics	GSK1324726A (I-BET726) is a highly selective inhibitor of <b>BET</b> family proteins with <b>IC50</b> of 41 nM, 31 nM, and 22 nM for BRD2, BRD3, and BRD4, respectively.	434.91	1300031-52-0	C25H23ClN2O3	Free Base	http://www.selleckchem.com/products/gsk1324726a-i-bet726.html	S7620
I-BRD9	Epigenetic Reader Domain	Epigenetics	I-BRD9 (GSK602) is a potent and selective BRD9 inhibitor with pIC50 of 7.3, while it displayed a pIC50 of 5.3 against BRD4.	497.55	1714146-59-4	C22H22F3N3O3S2	Free Base	http://selleckchem.com/products/i-brd9-gsk602.html	S7835
PFI-4	Epigenetic Reader Domain	Epigenetics	PFI-4 is a potent and selective <b>BRPF1 bromodomain</b> inhibitor with <b>IC50</b> of 80 nM.	380.44	900305-37-5	C21H24N4O3	Free Base	http://www.selleckchem.com/products/pfi-4.html	S7906
PF-CBP1	Epigenetic Reader Domain	Epigenetics	PF-CBP1 is a highly selective inhibitor of the bromodomain of CREB-binding protein(CREBBP).It inhibits CREBBP and p300 bromodomains with IC50 of 125 and 363 nM respectively.	525.08	NA	C29H37ClN4O3	Salt	http://selleckchem.com/products/pf-cbp1.html	S8180
BI-7273	Epigenetic Reader Domain	Epigenetics	BI-7273 is a potent, selective, and cell-permeable BRD9 BD Inhibitor.	353.41	1883429-21-7	C20H23N3O3	Free Base	http://selleckchem.com/products/bi-7273.html	S8179
ERK5-IN-1	ERK	MAPK	ERK5-IN-1 is a potent, and selective <b>ERK5</b> inhibitor with <b>IC50</b> of 162 nM.	638.81	1435488-37-1	C36H46N8O3	Free Base	http://www.selleckchem.com/products/erk5-in-1.html	S7334
FR 180204	ERK	MAPK	FR 180204 is an ATP-competitive, selective <b>ERK</b> inhibitor with <b>K<sub>i</sub></b> of 0.31 μM and 0.14 μM for ERK1 And ERK2, respectively.	327.34	865362-74-9	C18H13N7	Free Base	http://www.selleckchem.com/products/fr180204.html	S7524
XMD8-92	ERK	MAPK	XMD8-92 is a potent and selective BMK1/ERK5 inhibitor with Kd of 80 nM.	474.55	1234480-50-2	C26H30N6O3	Free Base	http://www.selleckchem.com/products/xmd8-92.html	S7525
VX-11e	ERK	MAPK	VX-11e is a potent, selective, and orally bioavailable ERK2 inhibitor with Ki of <2 nM, over 200-fold selective over other kinases tested.	500.35	896720-20-0	C24H20Cl2FN5O2	Free Base	http://selleckchem.com/products/vx-11e.html	S7709
Bazedoxifene HCl	Estrogen/progestin receptor	Endocrinology & Hormones	Bazedoxifene HCl is a novel, non-steroidal, indole-based estrogen receptor modulator (SERM) binding to both ERα and ERβ with IC50 of 23 nM and 89 nM.	507.06	198480-56-7	C30H35ClN2O3	Free Base	http://www.selleckchem.com/products/bazedoxifene-hcl.html	S2128
Fulvestrant	Estrogen/progestogen Receptor	Endocrinology & Hormones	Fulvestrant is an estrogen receptor (ER) antagonist with IC50 of 0.094 nM.	606.77	129453-61-8	C32H47F5O3S	Free Base	http://www.selleckchem.com/products/Fulvestrant.html	S1191
Ospemifene	Estrogen/progestogen Receptor	Endocrinology & Hormones	Ospemifene is a non-hormonal selective estrogen receptor modulator (SERM), used for the treatment of dyspareunia.	378.89	128607-22-7	C24H23ClO2	Free Base	http://www.selleckchem.com/products/ospemifene.html	S4285
Chlorotrianisene	Estrogen/progestogen Receptor	Endocrinology & Hormones	Chlorotrianisene is a synthetic, non-steroidal estrogen. It is a selective estrogen receptor modulator.	380.86	569-57-3	C23H21ClO3	Free Base	http://selleckchem.com/products/chlorotrianisene.html	S4629
4-Hydroxytamoxifen	Estrogen/progestogen Receptor	Endocrinology & Hormones	4-Hydroxytamoxifen is the active metabolite of tamoxifen and a selective estrogen receptor (ER) modulator that is widely used in the therapeutic and chemopreventive treatment of breast cancer.	387.51	68392-35-8	C26H29NO2	Free Base	http://selleckchem.com/products/4-hydroxytamoxifen-4-ht-afimoxifene.html	S7827
Endoxifen HCl	Estrogen/progestogen Receptor	Endocrinology & Hormones	Endoxifen HCl, the active metabolite of Tamoxifen, ia a potent and selective <b>estrogen receptor</b> antagonist. Phase 2.	409.95	1032008-74-4	C25H28ClNO2	Salt	http://www.selleckchem.com/products/endoxifen-hcl.html	S7839
Tolvaptan	Estrogen/progestogen Receptor	GPCR & G Protein	Tolvaptan is a selective, competitive arginine vasopressin receptor 2 antagonist with an IC50 of 1.28μM for the inhibition of AVP-induced platelet aggregation.	448.94	150683-30-0	C26H25ClN2O3	Free Base	http://www.selleckchem.com/products/tolvaptan-opc-41061.html	S2593
Zibotentan (ZD4054)	ETA Receptor	GPCR & G Protein	Zibotentan (ZD4054) is a specific Endothelin (ET)A antagonist with IC50 of 21 nM, exhibiting no activity at ETB. Phase 3.	424.43	186497-07-4	C19H16N6O4S	Free Base	http://www.selleckchem.com/products/Zibotentan(ZD4054).html	S1456
Bosentan Hydrate	ETA Receptor	GPCR & G Protein	Bosentan is an endothelin (ET) receptors antagonist for ET-A and ET-B with Ki of 4.7 nM and 95 nM, respectively.	569.63	157212-55-0	C27H31N5O7S	Hydrate	http://www.selleckchem.com/products/bosentan-hydrate.html	S3051
URB597	FAAH	Metabolism	URB597 is a potent, orally bioavailable FAAH inhibitor with IC50 of 4.6 nM, with no activity on other cannabinoid-related targets.	338.4	546141-08-6	C20H22N2O3	Free Base	http://www.selleckchem.com/products/urb597.html	S2631
PF-3845	FAAH	Metabolism	PF-3845 is a potent, selective and irreversible FAAH inhibitor with Ki of 230 nM, showing negligible activity against FAAH2.	456.46	1196109-52-0	C24H23F3N4O2	Free Base	http://www.selleckchem.com/products/pf-3845.html	S2666
JNJ-1661010	FAAH	Metabolism	JNJ-1661010 is a potent and selective FAAH inhibitor with IC50 of 10 nM (rat) and 12 nM (human), exhibits >100-fold selectivity for FAAH-1 when compared to FAAH-2.	365.45	681136-29-8	C19H19N5OS	Free Base	http://www.selleckchem.com/products/jnj-1661010.html	S2828
Apixaban	Factor Xa	Metabolism	Apixaban is a highly selective, reversible inhibitor of Factor Xa with Ki of 0.08 nM and 0.17 nM in human and rabbit, respectively.	459.5	503612-47-3	C25H25N5O4	Free Base	http://www.selleckchem.com/products/Apixaban(BMS-562247-01).html	S1593
Ozagrel	Factor Xa	Metabolism	Ozagrel is a potent and selective thromboxane A2 synthetase inhibitor with an IC50 of 4 nM.	228.25	82571-53-7	C13H12N2O2	Free Base	http://www.selleckchem.com/products/Ozagrel.html	S2496
Rivaroxaban	Factor Xa	Metabolism	Rivaroxaban is a direct inhibitor of Factor Xa with Ki and IC50 of 0.4 nM and 0.7 nM, respectively.	435.88	366789-02-8	C19H18ClN3O5S	Free Base	http://www.selleckchem.com/products/Rivaroxaban.html	S3002
PF-573228	FAK	Angiogenesis	PF-573228 is an ATP-competitive inhibitor of FAK with IC50 of 4 nM, ~50- to 250-fold selective for FAK than Pyk2, CDK1/7 and GSK-3β.	491.49	869288-64-2	C22H20F3N5O3S	Free Base	http://www.selleckchem.com/products/pf-573228.html	S2013
TAE226 (NVP-TAE226)	FAK	Angiogenesis	NVP-TAE226 is a potent FAK inhibitor with IC50 of 5.5 nM and modestly potent to Pyk2, ~10- to 100-fold less potent against InsR, IGF-1R, ALK, and c-Met.	468.94	761437-28-9	C23H25ClN6O3	Free Base	http://www.selleckchem.com/products/nvp-tae226.html	S2820
PF-562271	FAK	Angiogenesis	PF-562271 is a potent, ATP-competitive, reversible inhibitor of FAK with IC50 of 1.5 nM, ~10-fold less potent for Pyk2 than FAK and >100-fold selectivity against other protein kinases, except for some CDKs.	507.49	717907-75-0	C21H20F3N7O3S	Free Base	http://www.selleckchem.com/products/pf-562271.html	S2890
Erastin	Ferroptosis	Metabolism	Erastin is a ferroptosis activator by acting on mitochondrial VDAC, exhibiting selectivity for tumor cells bearing oncogenic RAS.	547.04	571203-78-6	C30H31ClN4O4	Free Base	http://www.selleckchem.com/products/erastin.html	S7242
Ferrostatin-1 (Fer-1)	Ferroptosis	Metabolism	Ferrostatin-1 (Fer-1) is a potent and selective inhibitor of ferroptosis with EC50 of 60 nM.	262.35	347174-05-4	C15H22N2O2	Free Base	http://www.selleckchem.com/products/ferrostatin-1-fer-1.html	S7243
AZD4547	FGFR	Angiogenesis	AZD4547 is a novel selective FGFR inhibitor targeting FGFR1/2/3 with IC50 of 0.2 nM/2.5 nM/1.8 nM, weaker activity against FGFR4, VEGFR2(KDR), and little activity observed against IGFR, CDK2, and p38. Phase 1/2.	463.57	1035270-39-3	C26H33N5O3	Free Base	http://www.selleckchem.com/products/azd4547.html	S2801
SSR128129E	FGFR	Angiogenesis	SSR128129E is an orally-active and allosteric FGFR1 inhibitor with IC50 of 1.9 μM, while not affecting other related RTKs.	346.31	848318-25-2	C18H15N2NaO4	Free Base	http://www.selleckchem.com/products/ssr128129e.html	S7167
Quizartinib (AC220)	Flt	Angiogenesis	Quizartinib (AC220) is a second-generation FLT3 inhibitor for Flt3(ITD/WT) with IC50 of 1.1 nM/4.2 nM, 10-fold more selective for Flt3 than KIT, PDGFRα, PDGFRβ, RET, and CSF-1R. Phase 1/2.	560.67	950769-58-1	C29H32N6O4S	Free Base	http://www.selleckchem.com/products/AC-220.html	S1526
TCS 359	FLT3	Angiogenesis	TCS 359 is a potent FLT3 inhibitor with IC50 of 42 nM.	360.43	301305-73-7	C18H20N2O4S	Free Base	http://www.selleckchem.com/products/tcs-359.html	S8023
XL335	FXR	Others	XL335 is a potent, selective FXR agonist with EC50 of 4 nM, highly selective versus other nuclear receptors, such as LXR, PPAR, ER and etc. Phase 1.	438.47	629664-81-9	C25H24F2N2O3	Free Base	http://www.selleckchem.com/products/way-362450.html	S2694
GW4064	FXR	Others	GW4064 is an agonist of farnesoid X receptor (FXR) with EC50 of 65 nM.	542.84	278779-30-9	C28H22Cl3NO4	Free Base	http://www.selleckchem.com/products/gw-4064.html	S2782
Etomidate	GABA Receptor	Neuronal Signaling	Etomidate is a GABAA receptors agonist at GABAA receptors.	244.29	33125-97-2	C14H16N2O2	Free Base	http://www.selleckchem.com/products/Etomidate.html	S1329
Ginkgolide A	GABA Receptor	Neuronal Signaling	Ginkgolide A is an extract from in Ginkgo biloba and a g-aminobutyric acid (GABA) antagonist with a Ki of 14.5 μM.	408.4	15291-75-5	C20H24O9	Free Base	http://www.selleckchem.com/products/ginkgolide-a.html	S2026
Tiagabine hydrochloride	GABA Receptor	Neuronal Signaling	Tiagabine Hydrochloride is the hydrochloride salt form of tiagabine, a nipecotic acid derivative with anticonvulsant property. A selective gamma-aminobutyric acid (GABA) reuptake inhibitor.	412.01	145821-59-6	C20H26ClNO2S2	hydrochloride	http://selleckchem.com/products/tiagabine-hydrochloride.html	S4661
Tiagabine	GABA Receptor	Neuronal Signaling	Tiagabine is an anti-convulsive medication and a selective gamma-aminobutyric acid (GABA) reuptake inhibitor.	375.55	115103-54-3	C20H25NO2S2	Free Base	http://selleckchem.com/products/tiagabine.html	S4675
PF-03084014 (PF-3084014)	Gamma-secretase	Neuronal Signaling	PF-03084014 (PF-3084014) is a selective <b>gamma-secretase</b> inhibitor with <b>IC50</b> of 6.2 nM in a cell-free assay. Phase 2.	489.64	1290543-63-3	C27H41F2N5O	Free Base	http://www.selleckchem.com/products/pf-03084014-pf-3084014.html	S8018
Semagacestat (LY450139)	Gamma-secretase	Proteases	Semagacestat (LY450139) is a γ-secretase blocker for Aβ42, Aβ40 and Aβ38 with IC50 of 10.9 nM, 12.1 nM and 12.0 nM, also inhibits Notch signaling with IC50 of 14.1 nM. Phase 3.	361.44	425386-60-3	C19H27N3O4	Free Base	http://www.selleckchem.com/products/Semagacestat(LY450139).html	S1594
YO-01027	Gamma-secretase	Proteases	YO-01027 (Dibenzazepine, DBZ) is a dipeptidic γ-secretase inhibitor with IC50 of 2.6 nM and 2.9 nM for APPL and Notch cleavage, respectively.	463.48	209984-56-5	C26H23F2N3O3	Free Base	http://www.selleckchem.com/products/yo-01027.html	S2711
LY411575	Gamma-secretase	Proteases	LY411575 is a potent γ-secretase inhibitor with IC50 of 0.078 nM/0.082 nM (membrane/cell-based), also inhibits Notch clevage with withIC50 of 0.39 nM.	479.48	209984-57-6	C26H23F2N3O4	Free Base	http://www.selleckchem.com/products/ly-411575.html	S2714
FLI-06	Gamma-secretase	Stem Cells & Wnt	FLI-06 is a novel inhibitor of Notch signaling with EC50 of 2.3 μM.	438.52	313967-18-9	C25H30N2O5	Free Base	http://www.selleckchem.com/products/fli-06.html	S7399
ADX-47273	GluR	Neuronal Signaling	ADX47273 is a potent and specific mGlu5 positive allosteric modulator(PAM) with EC50 of 0.17 μM, showing no activity at other mGlu subtypes.	369.36	851881-60-2	C20H17F2N3O2	Free Base	http://www.selleckchem.com/products/adx-47273.html	S2690
VU 0357121	GluR	Neuronal Signaling	VU0357121 is a novel positive allosteric modulator (PAM) of mGlu5 with EC50 of 33 nM, is inactive or very weakly antagonizing at other mGlu receptor subtypes.	305.32	433967-28-3	C17H17F2NO2	Free Base	http://www.selleckchem.com/products/vu-0357121.html	S2795
VU 0364770	GluR	Neuronal Signaling	VU 0364770 is a positive allosteric modulator(PAM) of mGlu4 with EC50 of 1.1 μM, exhibits insignificant activity at 68 other receptors, including other mGlu subtypes.	232.67	61350-00-3	C12H9ClN2O	Free Base	http://www.selleckchem.com/products/vu-0364770.html	S2862
Perampanel	GluR	Neuronal Signaling	Perampanel is an orally active, non-competitive, and selective alpha-amino-3-hydroxy-5-methyl-4-isoxazolepropionic acid (AMPA) glutamate receptor antagonist, with anti-epileptic activity.	349.38	380917-97-5	C23H15N3O	Free Base	http://selleckchem.com/products/perampanel.html	S4688
BMS-378806	gp120/CD4	Others	BMS-378806 selectively inhibits the binding of HIV-1 gp120 to the CD4 receptor with EC50 of 0.85-26.5 nM in virus.	406.43	357263-13-9	C22H22N4O4	Free Base	http://selleckchem.com/products/bms806.html	S2632
GSK1292263	GPR	Endocrinology & Hormones	GSK1292263 is a novel GPR119 agonist, showing potential for the treatment of type 2 diabetes. Phase 2.	456.56	1032823-75-8	C23H28N4O4S	Free Base	http://www.selleckchem.com/products/GSK1292263.html	S2149
TAK-875	GPR	Endocrinology & Hormones	TAK-875 is a selective GPR40 agonist with EC50 of 14 nM, 400-fold more potent than oleic acid.	533.63	1374598-80-7	C58H66O15S2	Hydrate	http://www.selleckchem.com/products/tak-875.html	S2637
OC000459	GPR	Endocrinology & Hormones	OC000459 is a potent and selective D prostanoid receptor 2 (DP2) antagonist with IC50 of 13 nM.	348.37	851723-84-7, 950688-14-9 (sodium salt)	C21H17FN2O2	Free Base	http://www.selleckchem.com/products/oc000459.html	S2822
AZD1981	GPR	Endocrinology & Hormones	AZD1981 is a potent, selective CRTh2 (DP2) receptor antagonist with IC50 of 4 nM, showing >1000-fold selectivity over more than 340 other enzymes and receptors, including DP1.	388.87	802904-66-1	C19H17ClN2O3S	Free Base	http://www.selleckchem.com/products/azd1981.html	S7263
GW9508	GPR	Endocrinology & Hormones	GW9508 is a potent and selective agonist for FFA1 (GPR40) with pEC50 of 7.32, 100-fold selective against GPR120, stimulates insulin secretion in a glucose-sensitive manner.	347.41	885101-89-3	C22H21NO3	Free Base	http://www.selleckchem.com/products/gw9508.html	S8014
TWS119	GSK-3	PI3K/Akt/mTOR	TWS119 is a GSK-3β inhibitor with IC50 of 30 nM; capable of inducing neuronal differentiation and may be useful to stem cell biology.	318.33	601514-19-6	C18H14N4O2	Free Base	http://www.selleckchem.com/products/TWS119.html	S1590
SB415286	GSK-3	PI3K/Akt/mTOR	SB415286 is a potent GSK3α inhibitor with IC50/Ki of 78 nM/31 nM with equally effective inhibition of GSK-3β.	359.72	264218-23-7	C16H10ClN3O5	Free Base	http://www.selleckchem.com/products/sb-415286.html	S2729
IM-12	GSK-3	PI3K/Akt/mTOR	IM-12 is a selective GSK-3β inhibitor with IC50 of 53 nM, and also enhances canonical Wnt signalling.	377.41	1129669-05-1	C22H20FN3O2	Free Base	http://www.selleckchem.com/products/im-12.html	S7566
Santacruzamate A (CAY10683)	HDAC	DNA Damage	Santacruzamate A (CAY10683) is a potent and selective HDAC inhibitor with IC50 of 119 pM for HDAC2, >3600-fold selectivity over other HDACs.	278.35	1477949-42-0	C15H22N2O3	Free Base	http://www.selleckchem.com/products/santacruzamate-a-cay10683.html	S7595
CAY10603	HDAC	DNA Damage	CAY10603 is a potent and selective <b>HDAC6</b> inhibitor with <b>IC50</b> of 2 pM, >200-fold selectivity over other HDACs.	446.5	1045792-66-2	C22H30N4O6	Free Base	http://www.selleckchem.com/products/cay10603.html	S7596
Panobinostat (LBH589)	HDAC	Epigenetics	Panobinostat (LBH589) is a novel broad-spectrum HDAC inhibitor with IC50 of 5 nM. Phase 3.	349.43	404950-80-7	C21H23N3O2	Free Base	http://www.selleckchem.com/products/LBH-589.html	S1030
TMP269	HDAC	Epigenetics	TMP269 is a potent, selective class IIa HDAC inhibitor with IC50 of 157 nM, 97 nM, 43 nM and 23 nM for HDAC4, HDAC5, HDAC7 and HDAC9, respectively.	514.52	1314890-29-3	C25H21F3N4O3S	Free Base	http://www.selleckchem.com/products/tmp269.html	S7324
4SC-202	HDAC	Epigenetics	4SC-202 is a selective class I <b>HDAC</b> inhibitor with <b>IC50</b> of 1.20 μM, 1.12 μM, and 0.57 μM for HDAC1, HDAC2, and HDAC3, respectively. Also displays inhibitory activity against <b>Lysine specific demethylase 1 (LSD1)</b>. Phase 1.	447.51	910462-43-0	C23H21N5O3S	Free Base	http://www.selleckchem.com/products/4sc-202.html	S7555
Trichostatin A (TSA)	HDAC	Others	Trichostatin A (TSA) is an HDAC inhibitor with IC50 of ~1.8 nM – HDAC8 is the only known member of the HDAC-family that is not affected by TSA. Phase 3.	302.4	58880-19-6	C17H22N2O3	Free Base	http://www.selleckchem.com/products/Trichostatin-A.html	S1045
Belinostat (PXD101)	HDAC	Others	Belinostat (PXD101) is a novel HDAC inhibitor with IC50 of 27 nM, with activity demonstrated in cisplatin-resistant tumors. Phase 1/2.	318.35	414864-00-9	C15H14N2O4S	Free Base	http://www.selleckchem.com/products/Belinostat.html	S1085
PF-5274857	Hedgehog/Smoothened	Stem Cells & Wnt	PF-5274857 is a potent and selective Smoothened (Smo) antagonist, inhibits Hedgehog (Hh) signaling with IC50 and Ki of 5.8 nM and 4.6 nM, respectively, and can penetrate the blood–brain barrier.	436.96	1373615-35-0	C20H25ClN4O3S	Free Base	http://selleckchem.com/products/pf-5274857.html	S2777
Mubritinib (TAK 165)	HER2	Protein Tyrosine Kinase	Mubritinib (TAK-165) is a potent inhibitor of HER2/ErbB2 with IC50 of 6 nM; no activity to EGFR, FGFR, PDGFR, JAK1, Src and Blk.	468.47	366017-09-6	C25H23F3N4O2	Free Base	http://www.selleckchem.com/products/Mubritinib-TAK-165.html	S2216
Tyrphostin AG 879	HER2	Protein Tyrosine Kinase	Tyrphostin AG 879 potently inhibits HER2/ErbB2 with IC50 of 1 μM, 100- and 500-fold higher selective to ErbB2 than PDGFR and EGFR.	316.46	148741-30-4	C18H24N2OS	Free Base	http://www.selleckchem.com/products/tyrphostin-ag-879-ag-879.html	S2816
FG-4592	HIF	Angiogenesis	FG-4592 is an HIF α prolyl hydroxylase inhibitor, stabilizes HIF-2 and induces EPO production. Phase 2/3.	352.34	808118-40-3	C19H16N2O5	Free Base	http://www.selleckchem.com/products/fg-4592.html	S1007
2-Methoxyestradiol (2-MeOE2)	HIF	Angiogenesis	2-Methoxyestradiol depolymerizes microtubules and blocks HIF-1α nuclear accumulation and HIF-transcriptional activity. Phase 2.	302.41	362-07-2	C19H26O3	Free Base	http://www.selleckchem.com/products/2-Methoxyestradiol(2ME2).html	S1233
IOX2	HIF	Angiogenesis	IOX2 is a potent inhibitor of HIF-1α prolyl hydroxylase-2 (PHD2) with IC50 of 21 nM, >100-fold selectivity over JMJD2A, JMJD2C, JMJD2E, JMJD3, or the 2OG oxygenase FIH.	352.34	931398-72-0	C19H16N2O5	Free Base	http://www.selleckchem.com/products/iox2.html	S2919
PX-478 2HCl	HIF	Angiogenesis	PX-478 2HCl is an orally active, and selective <b>hypoxia-inducible factor-1α (HIF-1α)</b> inhibitor. Phase 1.	394.12	685898-44-6	C13H20Cl4N2O3	Salt	http://www.selleckchem.com/products/px-478-2hcl.html	S7612
KC7F2	HIF	Angiogenesis	KC7F2 is a selective <b>HIF-1α</b> transcription inhibitor with <b>IC50</b> of 20 μM in a cell-based assay.	570.38	927822-86-4	C16H16Cl4N2O4S4	Free Base	http://www.selleckchem.com/products/kc7f2.html	S7946
Lidocaine	Histamine Receptor	Neuronal Signaling	Lidocaine is a selective inverse peripheral histamine H1-receptor agonist with an IC50 of >32 μM.	234.34	137-58-6	C14H22N2O	Free Base	http://www.selleckchem.com/products/Lidocaine.html	S1357
Loratadine	Histamine Receptor	Neuronal Signaling	Loratadine is a selective inverse peripheral histamine H1-receptor agonist with an IC50 of >32 μM.	382.88	79794-75-5	C22H23ClN2O2	Free Base	http://www.selleckchem.com/products/Loratadine.html	S1358
Clemastine Fumarate	Histamine Receptor	Neuronal Signaling	Clemastine Fumarate (Clemastine) is a selective histamine H1 receptor antagonist with IC50 of 3 nM.	459.96	14976-57-9	C25H30ClNO5	Free Base	http://www.selleckchem.com/products/Clemastine-Fumarate.html	S1847
Roxatidine Acetate HCl	Histamine Receptor	Neuronal Signaling	Roxatidine Acetate HCl is a specific and competitive histamin H2-receptor antagonist, with IC50 of 3.2 μM, inhibits gastric acid secretion and ulcer formation.	384.9	93793-83-0	C19H29ClN2O4	HCl	http://www.selleckchem.com/products/roxatidine-acetate-hcl.html	S1880
Lafutidine	Histamine Receptor	Neuronal Signaling	Lafutidine, a newly developed histamine H(2)-receptor antagonist, inhibits gastric acid secretion.	431.55	118288-08-7	C22H29N3O4S	Free Base	http://www.selleckchem.com/products/lafutidine.html	S2065
C646	Histone Acetyltransferase	Epigenetics	C646 is an inhibitor for histone acetyltransferase, and inhibits p300 with a Ki of 400 nM. Preferentially selective for p300 versus other acetyltransferases.	445.42	328968-36-1	C24H19N3O6	Free Base	http://www.selleckchem.com/products/c646.html	S7152
ML324	Histone Demethylase	Epigenetics	ML324 is a selective inhibitor of <b>jumonji histone demethylase (JMJD2)</b> with <b>IC50</b> of 920 nM.	349.43	1222800-79-4	C21H23N3O2	Free Base	http://www.selleckchem.com/products/ml324.html	S7296
GSK-LSD1 2HCl	Histone Demethylase	Epigenetics	GSK-LSD1 2HCl is an irreversible, and selective <b>LSD1</b> inhibitor with <b>IC50</b> of 16 nM, > 1000 fold selective over other closely related FAD utilizing enzymes (i.e. LSD2, MAO-A, MAO-B).	289.24	1431368-48-7	C14H22Cl2N2	Salt	http://www.selleckchem.com/products/gsk-lsd1-2hcl.html	S7574
SP2509	Histone Demethylase	Epigenetics	SP2509 is a selective <b>histone demethylase LSD1</b> inhibitor with <b>IC50</b> of 13 nM, showing no activity against MAO-A, MAO-B, lactate dehydrogenase and glucose oxidase.	437.90	1423715-09-6	C19H20ClN3O5S	Free Base	http://www.selleckchem.com/products/sp2509.html	S7680
GSK2879552 2HCl	Histone demethylase	Epigenetics	GSK2879552 2HCl is a potent, selective, orally bioavailable, irreversible LSD1 inhibitor with Kiapp of 1.7 μM. Phase 1.	437.4	1401966-69-5 (free base)	C23H30Cl2N2O2	Salt	http://selleckchem.com/products/gsk2879552-2hcl.html	S7796
OG-L002	Histone demethylases	Epigenetics	OG-L002 is a potent and specific LSD1 inhibitor with IC50 of 20 nM, exhibiting 36- and 69-fold selectivity over MAO-B and MAO-A, respectively.	225.29	1357302-64-7	C15H15NO	Free Base	http://www.selleckchem.com/products/og-l002.html	S7237
JIB-04	Histone demethylases	Epigenetics	JIB-04 is a pan-selective <b>Jumonji histone demethylase</b> inhibitor with <b>IC50</b> of 230, 340, 855, 445, 435, 1100, and 290 nM for JARID1A, JMJD2E, JMJD3, JMJD2A, JMJD2B, JMJD2C, and JMJD2D in cell-free assays, respectively.	308.76	199596-05-9	C17H13ClN4	Free Base	http://www.selleckchem.com/products/jib-04.html	S7281
SGC 0946	Histone Methyltransferase	Epigenetics	SGC 0946 is a highly potent and selective DOT1L methyltransferase inhibitor with IC50 of 0.3 nM, is inactive against a panel of 12 PMTs and DNMT1.	618.57	1561178-17-3	C28H40BrN7O4	Free Base	http://www.selleckchem.com/products/sgc-0946.html	S7079
MM-102	Histone Methyltransferase	Epigenetics	MM-102 is a high-affinity peptidomimetic MLL1 inhibitor with IC50 of 0.4 μM.	669.8	1417329-24-8	C35H49F2N7O4	Free Base	http://www.selleckchem.com/products/mm-102.html	S7265
PFI-2	Histone Methyltransferase	Epigenetics	PFI-2 is a potent, selective, and cell-active <b>lysine methyltransferase SETD7</b> inhibitor with <b>K<sub>i (app)</sub></b> and <b>IC50</b> of 0.33 nM and 2 nM, 1000-fold selectivity over other methyltransferases and other non-epigenetic targets.	499.52	1627676-59-8	C23H25F4N3O3S	Free Base	http://www.selleckchem.com/products/pfi-2.html	S7294
A-366	Histone Methyltransferase	Epigenetics	A-366 is a potent and selective G9a/GLP histone lysine methyltransferase inhibitor with IC50 of 3.3nM, exhibiting >1000-fold selectivity for G9a/GLP over 21 other methyltransferases.	329.44	1527503-11-2	C19H27N3O2	Free Base	http://selleckchem.com/products/a-366.html	S7572
EI1	Histone Methyltransferase	Epigenetics	EI1 is a potent and selective <b>EZH2</b> inhibitor with <b>IC50</b> of 15 nM and 13 nM for EZH2 (WT) and EZH2 (Y641F), respectively.	390.48	1418308-27-6	C23H26N4O2	Free Base	http://www.selleckchem.com/products/ei1.html	S7611
CPI-360	Histone Methyltransferase	Epigenetics	CPI-360 is a potent, selective,and SAM-competitive <b>EZH1</b> inhibitor with <b>IC50</b> of 102.3 nM, >100-fold selectivity over other methyltransferases.	437.53	1802175-06-9	C25H31N3O4	Free Base	http://www.selleckchem.com/products/cpi-360.html	S7656
EPZ015666	Histone Methyltransferase	Epigenetics	EPZ015666 is a potent, selective and orally bioavailable <b>PRMT5</b> inhibitor with <b>K<sub>i</sub></b> of 5 nM, >20,000-fold selectivity over other PMTs.	383.44	1616391-65-1	C20H25N5O3	Free Base	http://www.selleckchem.com/products/epz015666.html	S7748
GSK503	Histone Methyltransferase	Epigenetics	GSK503 is a potent and specific <b>EZH2</b> methyltransferase inhibitor.	526.67	1346572-63-1	C31H38N6O2	Free Base	http://www.selleckchem.com/products/gsk503.html	S7804
EPZ011989	Histone Methyltransferase	Epigenetics	EPZ011989 is a potent, selective, orally bioavailable EZH2 inhibitor with Ki of <3 nM.	642.27	1598383-40-4(free base)	C35H52ClN5O4	Salt	http://selleckchem.com/products/epz011989.html	S7805
SGC707	Histone Methyltransferase	Epigenetics	SGC707 is a potent, selective and cell-active allosteric inhibitor of protein arginine methyltransferase 3 (PRMT3) with IC50 and Kd of 31 nM and 53 nM, respectively.	298.34	1687736-54-4	C16H18N4O2	Free Base	http://selleckchem.com/products/sgc707.html	S7832
GSK591	Histone Methyltransferase	Epigenetics	GSK591 (EPZ015866,GSK3203591) is a potent selective inhibitor of the arginine methyltransferase PRMT5 with IC50 of 11 nM.	380.48	1616391-87-7	C22H28N4O2	Free Base	http://selleckchem.com/products/gsk591-epz015866-gsk3203591.html	S8111
MS023	Histone Methyltransferase	Epigenetics	MS023 is a potent, selective, and cell-active Type I PRMT inhibitor with IC50 of 30 nM, 119 nM, 83 nM, 4 nM, and 5 nM for PRMT1, PRMT3, PRMT4, PRMT6 and PRMT8, respectively.	287.40	1831110-54-3	C17H25N3O	Free Base	http://selleckchem.com/products/ms023.html	S8112
HLCL-61	Histone Methyltransferase	Epigenetics	HLCL-61 hydrochloride is a potent and selective PRMT5 inhibitor for the treatment of acute myeloid leukemia.	380.91	1158279-20-9	C23H25ClN2O	Salt	http://selleckchem.com/products/hlcl-61-hydrochloride.html	S8209
Fluvastatin Sodium	HMG-CoA Reductase	Metabolism	Fluvastatin Sodium inhibits HMG-CoA reductase activity with IC50 of 8 nM.	433.45	93957-55-2	C24H25FNNaO4	Sodium	http://www.selleckchem.com/products/Fluvastatin-Sodium(Lescol).htm	S1909
Lovastatin	HMG-CoA Reductase	Metabolism	Lovastatin is an inhibitor of HMG-CoA reductase with IC50 of 3.4 nM, used for lowering cholesterol (hypolipidemic agent).	404.54	75330-75-5	C24H36O5	Free Base	http://www.selleckchem.com/products/lovastatin-mevacor.html	S2061
Atorvastatin Calcium	HMG-CoA Reductase	Metabolism	Atorvastatin (Lipitor) is an inhibitor of HMG-CoA reductase used as a cholesterol-lowering medication that blocks the production of cholesterol.	1155.34	134523-03-8	C66H68CaF2N4O10	Calcium	http://www.selleckchem.com/products/atorvastatin-calcium-lipitor.html	S2077
PU-H71	HSP	Cytoskeletal Signaling	PU-H71 is a potent and selective inhibitor of HSP90 with IC50 of 51 nM. Phase 1.	512.37	873436-91-0	C18H21IN6O2S	Free Base	http://www.selleckchem.com/products/pu-h71.html	S8039
AUY922 (NVP-AUY922)	HSP	Others	AUY922 (NVP-AUY922) is a highly potent HSP90 inhibitor for HSP90α/β with IC50 of 13 nM /21 nM, weaker potency against the HSP90 family members GRP94 and TRAP-1, exhibits the tightest binding of any small-molecule HSP90 ligand. Phase 1/2.	465.54	747412-49-3	C26H31N3O5	Free Base	http://www.selleckchem.com/products/NVP-AUY922.html	S1069
17-AAG (Tanespimycin)	HSP	Others	17-AAG is a potent HSP90 inhibitor with IC50 of 5 nM, having a 100-fold higher binding affinity for HSP90 derived from tumour cells than HSP90 from normal cells.	585.69	75747-14-7	C31H43N3O8	Free Base	http://www.selleckchem.com/products/17-AAG(Geldanamycin).html	S1141
Ganetespib (STA-9090)	HSP	Others	Ganetespib is an HSP90 inhibitor with IC50 of 4 nM in OSA 8 cells, induces apoptosis of OSA cells while normal osteoblasts are not affected; active metabolite of STA-1474.	364.4	888216-25-9	C20H20N4O3	Free Base	http://www.selleckchem.com/products/ganetespib-sta-9090.html	S1159
HSP990 (NVP-HSP990)	HSP (e.g. HSP90)	Cytoskeletal Signaling	NVP-HSP990 (HSP990) is a novel, potent and selective HSP90 inhibitor for HSP90α/β with IC50 of 0.6 nM/0.8 nM.	379.39	934343-74-5	C20H18FN5O2	Free Base	http://www.selleckchem.com/products/hsp990-nvp-hsp990.html	S7097
Isotretinoin	Hydroxylase	Metabolism	It was developed to be used as a chemotherapy medication for the treatment of brain cancer, pancreatic cancer and more.	300.44	4759-48-2	C20H28O2	Free Base	http://www.selleckchem.com/products/Isotretinoin.html	S1379
(R)-Nepicastat HCl	Hydroxylase	Metabolism	(R)-Nepicastat HCl, the R-enantiomer of Nepicastat HCl, is a potent and selective inhibitor with IC50 of 25.1 nM and 18.3 nM for bovine and human dopamine-β-hydroxylase, with negligible affinity for twelve other enzymes and thirteen neurotransmitter receptors.	331.81	195881-94-8	C14H16ClF2N3S	Salt	http://www.selleckchem.com/products/r-nepicastat-hcl.html	S4926
GDC-0152	IAP	Apoptosis	GDC-0152 is a potent antagonist of XIAP-BIR3, ML-IAP-BIR3, cIAP1-BIR3 and cIAP2-BIR3 with Ki of 28 nM, 14 nM, 17 nM and 43 nM, respectively; less affinity shown to cIAP1-BIR2 and cIAP2-BIR2. Phase 1.	498.64	873652-48-3	C25H34N6O3S	Free Base	http://www.selleckchem.com/products/gdc-0152.html	S7010
Embelin	IAP	Apoptosis	Embelin, a quinone isolated from the Japanese Ardisia herb, is an inhibitor of X-linked inhibitor of apoptosis (XIAP) with IC50 of 4.1 &mu;M.	294.39	550-24-3	C17H26O4	Free Base	https://www.selleckchem.com/products/embelin.html	S7025
NLG919	IDO	Metabolism	NLG919 is a potent IDO (indoleamine-(2,3)-dioxygenase) pathway inhibitor with Ki/EC50 of 7 nM/75 nM.	282.38	1402836-58-1	C18H22N2O	Free Base	http://www.selleckchem.com/products/nlg919.html	S7111
Epacadostat (INCB024360)	IDO	Metabolism	Epacadostat (INCB024360) is a potent and selective indoleamine 2,3-dioxygenase (<b>IDO1</b>) inhibitor with <b>IC50</b> of 10 nM. Phase 2.	438.23	1204669-58-8	C11H13BrFN7O4S	Free Base	http://www.selleckchem.com/products/epacadostat-incb024360.html	S7910
OSI-906 (Linsitinib)	IGF-1R	Others	OSI-906 (Linsitinib) is a selective inhibitor of IGF-1R with IC50 of 35 nM; modestly potent to InsR with IC50 of 75 nM, and no activity towards Abl, ALK, BTK, EGFR, FGFR1/2, PKA etc. Phase 3.	421.49	867160-71-2	C26H23N5O	Free Base	http://www.selleckchem.com/products/OSI-906.html	S1091
GSK1904529A	IGF-1R	Others	GSK1904529A is a selective inhibitor of IGF-1R and IR with IC50 of 27 nM and 25 nM, >100-fold more selective for IGF-1R/InsR than Akt1/2, Aurora A/B,B-Raf, CDK2, EGFR etc.	851.96	1089283-49-7	C44H47F2N9O5S	Free Base	http://www.selleckchem.com/products/GSK1904529A.html	S1093
Picropodophyllin (PPP)	IGF-1R	Protein Tyrosine Kinase	Picropodophyllin (PPP) is a selective <b>IGF-1R</b> inhibitor with <b>IC50</b> of 1 nM. Phase 1/2.	414.41	477-47-4	C22H22O8	Free Base	http://www.selleckchem.com/products/picropodophyllin-ppp.html	S7668
TPCA-1	IKK	NF-κB	TPCA-1 is an inhibitor of IKK-2 with IC50 of 17.9 nM, inhibits NF-κB pathway, exhibits 22-fold selectivity over IKK-1.	279.29	507475-17-4	C12H10FN3O2S	Free Base	http://www.selleckchem.com/products/tpca-1.html	S2824
IMD 0354	IKK	NF-κB	IMD-0354 is an IKKβ inhibitor and blocks IκBα phosphorylation in NF-κB pathway.	383.67	978-62-1	C15H8ClF6NO2	Free Base	http://www.selleckchem.com/products/imd-0354.html	S2864
IKK-16 (IKK Inhibitor VII)	IKK	NF-κB	IKK 16 is a selective IκB kinase (IKK) inhibitor for IKK-2, IKK complex and IKK-1 with IC50 of 40 nM, 70 nM and 200 nM, respectively.	483.63	873225-46-8	C28H29N5OS	Free Base	http://www.selleckchem.com/products/ikk-16.html	S2882
BMS-707035	Integrase	Microbiology	BMS-707035 is a specific HIV-I integrase (IN) inhibitor with IC50 of 15 nM. Phase 2.	410.42	729607-74-3	C17H19FN4O5S	Free Base	http://www.selleckchem.com/products/BMS-707035.html	S1366
Elvitegravir (GS-9137, JTK-303)	Integrase	Microbiology	Elvitegravir (EVG, JTK-303/GS-9137) is an HIV integrase inhibitor for HIV-1 IIIB, HIV-2 EHO and HIV-2 ROD with IC50 of 0.7 nM, 2.8 nM and 1.4 nM, respectively.	447.88	697761-98-1	C23H23ClFNO5	Free Base	http://www.selleckchem.com/products/Elvitegravir.html	S2001
Raltegravir (MK-0518)	Integrase	Microbiology	Raltegravir (MK-0518) is a potent integrase (IN) inhibitor for WT and S217Q PFV IN with IC50 of 90 nM and 40 nM, respectively.	444.42	518048-05-0	C20H21FN6O5	Free Base	http://www.selleckchem.com/products/Raltegravir-(MK-0518).html	S2005
Cyclo (-RGDfK)	Integrin	Cytoskeletal Signaling	Cyclo (-RGDfK) is a potent and selective <b>αvβ3 integrin</b> inhibitor.	717.69	161552-03-0	C29H42F3N9O9	Free Base	http://www.selleckchem.com/products/cyclo-rgdfk.html	S7834
Cyclo(RGDyK)	Integrin	Cytoskeletal Signaling	Cyclo(RGDyK) is a potent and selective <b>αVβ3 integrin</b> inhibitor with <b>IC50</b> of 20 nM.	847.72	250612-42-1	C31H45F6N9O12	Free Base	http://www.selleckchem.com/products/cyclo-rgdyk.html	S7844
SC-514	IκB/IKK	NF-κB	SC-514 is an orally active, ATP-competitive IKK-2 inhibitor with IC50 of 3-12 μM, blocks NF-κB-dependent gene expression, does not inhibit other IKK isoforms or other serine-threonine and tyrosine kinases.	224.3	354812-17-2	C9H8N2OS2	Free Base	http://www.selleckchem.com/products/sc-514.html	S4907
LY2409881	IκB/IKK	NF-κB	LY2409881 is a potent and selective <b>IKK2</b> inhibitor with <b>IC50</b> of 30 nM, >10-fold selectivity over IKK1 and other common kinases.	594.43	946518-60-1	C24H32Cl4N6OS	Salt	http://www.selleckchem.com/products/ly2409881.html	S7697
Ruxolitinib (INCB018424)	JAK	JAK/STAT	INCB018424 is the first potent, selective, JAK1/2 inhibitor to enter the clinic with IC50 of 3.3 nM/2.8 nM, >130-fold selectivity for JAK1/2 versus JAK3. Phase 3.	306.37	941678-49-5	C17H18N6	Free Base	http://www.selleckchem.com/products/INCB18424.html	S1378
LY2784544	JAK	JAK/STAT	LY2784544 is a potent JAK2 inhibitor with IC50 of 3 nM, effective in JAK2V617F, 8- and 20-fold selective versus JAK1 and JAK3. Phase 2.	469.94	1229236-86-5	C23H25ClFN7O	Free Base	http://www.selleckchem.com/products/LY2784544.html	S2179
Tofacitinib (CP-690550,Tasocitinib)	JAK	JAK/STAT	Tofacitinib is a novel inhibitor of JAK3 with IC50 of 1 nM, 20- to 100-fold less potent against JAK2 and JAK1.	312.37	477600-75-2	C16H20N6O	Free Base	http://www.selleckchem.com/products/tofacitinib-cp-690550.html	S2789
Decernotinib (VX-509)	JAK	JAK/STAT	Decernotinib (VX-509) is a potent and selective JAK3 inhibitor with Ki of 2.5 nM, >4-fold selectivity over JAK1, JAK2, and TYK2, respectively. Phase 2/3.	392.38	944842-54-0	C18H19F3N6O	Free Base	http://selleckchem.com/products/decernotinib-vx-509.html	S7541
Filgotinib (GLPG0634)	JAK	JAK/STAT	Filgotinib (GLPG0634) is a selective JAK1 inhibitor with IC50 of 10 nM, 28 nM, 810 nM, and 116 nM for JAK1, JAK2, JAK3, and TYK2, respectively. Phase 2.	425.5	1206161-97-8	C21H23N5O3S	Free Base	http://www.selleckchem.com/products/filgotinib.html	S7605
Pacritinib (SB1518)	JAK	JAK/STAT	Pacritinib (SB1518) is a potent and selective inhibitor of Janus Kinase 2 (JAK2) and Fms-Like Tyrosine Kinase-3 (FLT3) with IC50s of 23 and 22 nM, respectively.	472.58	937272-79-2	C28H32N4O3	Free Base	http://www.selleckchem.com/products/pacritinib-sb1518.html	S8057
SP600125	JNK	MAPK	SP600125 is a broad-spectrum JNK inhibitor for JNK1, JNK2 and JNK3 with IC50 of 40 nM, 40 nM and 90 nM, respectively; 10-fold greater selectivity against MKK4, 25-fold greater selectivity against MKK3, MKK6, PKB, and PKCα, and 100-fold selectivity against ERK2, p38, Chk1, EGFR etc.	220.23	129-56-6	C14H8N2O	Free Base	http://www.selleckchem.com/products/SP600125.html	S1460
JNK Inhibitor IX	JNK	MAPK	JNK inhibitor IX is a selective and potent JNK inhibitor with pIC50 of 6.5 and 6.7 for JNK2 and JNK3, respectively.	332.42	312917-14-9	C20H16N2OS	Free Base	http://www.selleckchem.com/products/jnk-inhibitor-ix.html	S7508
Vacquinol-1	JNK	MAPK	Vacquinol-1 is an MKK4 activator, which rapidly and selectively induces glioma cell death.	425.78	5428-80-8（free base）	C21H23Cl3N2O	dihydrochloride	http://selleckchem.com/products/vacquinol-1.html	S7544
6H05	K-Ras(G12C)	Cell Cycle	6H05 is a selective, and allosteric inhibitor of oncogenic K-Ras(G12C).	590.14	NA	C22H31ClF3N3O4S3	Free Base	http://www.selleckchem.com/products/6h05.html	S7330
Ispinesib (SB-715992)	Kinesin	Cytoskeletal Signaling	Ispinesib (SB-715992, CK0238273) is a potent, specific and reversible inhibitor of kinesin spindle protein (KSP) with Ki app of 1.7 nM, no inhibition to CENP-E, RabK6, MCAK, MKLP1, KHC or Kif1A. Phase 1/2.	517.06	336113-53-2	C30H33ClN4O2	Free Base	http://www.selleckchem.com/products/Ispinesib-mesilate(SB-715992).html	S1452
AZ 3146	Kinesin	Cytoskeletal Signaling	AZ3146 is a selective Mps1 inhibitor with IC50 of ~35 nM, contributes to recruitment of CENP-E (kinesin-related motor protein), less potent to FAK, JNK1, JNK2, and Kit.	452.55	1124329-14-1	C24H32N6O3	Free Base	http://www.selleckchem.com/products/az-3146.html	S2731
ARQ 621	Kinesin	Cytoskeletal Signaling	ARQ 621 is an allosteric, and selective Eg5 mitotic motor protein inhibitor. Phase 1.	552.43	1095253-39-6	C28H24Cl2FN5O2	Free Base	http://www.selleckchem.com/products/arq-621.html	S7355
GNE-0877	leucine-rich repeat kinase 2 (LRRK2)	Autophagy	GNE-0877 is a highly potent and selective leucine-rich repeat kinase 2 (LRRK2) inhibitor with Ki of 0.7 nM.	339.32	1374828-69-9	C14H16F3N7	Free Base	http://www.selleckchem.com/products/gne-0877.html	S7367
GW3965 HCl	Liver X Receptor	Others	GW3965 is a potent, selective LXRagonist for hLXRα and hLXRβ with EC50 of 190 and 30 nM, respectively.	618.51	405911-17-3	C33H32Cl2F3NO3	hydrochloride	http://www.selleckchem.com/products/gw3965.html	S2630
T0901317	Liver X Receptor	Others	T0901317 is a potent and selective agonist for both LXR and FXR, with EC50 of ~50 nM and 5 μM, respectively.	481.33	293754-55-9	C17H12F9NO3S	Free Base	http://www.selleckchem.com/products/t0901317.html	S7076
Ki16425	LPA Receptor	GPCR & G Protein	Ki16425 is a competitive, potent and reversible antagonist to LPA1, LPA2 and LPA3 with Ki of 0.34 μM, 6.5 μM and 0.93 μM, respectively, shows no activity at LPA4, LPA5, LPA6.	474.96	355025-24-0	C23H23ClN2O5S	Free Base	http://www.selleckchem.com/products/Ki16425.html	S1315
Ki16198	LPA Receptor	GPCR & G Protein	Ki16198 is the methyl ester of Ki16425, which is a LPA antagonist and inhibits LPA1- and LPA3-induced inositol phosphate production with Ki of 0.34 μM and 0.93 μM, respectively, shows weaker inhibition for LPA2, no activity at LPA4, LPA5, LPA6.	488.98	355025-13-7	C24H25ClN2O5S	Free Base	http://www.selleckchem.com/products/ki16198.html	S2906
GNE-7915	LRRK	Autophagy	GNE-7915 is a highly potent, selective, and brain-penetrable leucine-rich repeat kinase 2 (LRRK2) inhibitor, with IC50 and Ki of 9 nM and 1 nM, respectively.	443.4	1351761-44-8	C19H21F4N5O3	Free Base	http://www.selleckchem.com/products/gne-7915.html	S7528
GNE-9605	LRRK2	Autophagy	GNE-9605 is a highly potent and selective leucine-rich repeat kinase 2 (LRRK2) inhibitor with Ki and IC50 of 2 nM and 19 nM, respectively.	449.83	1536200-31-3	C17H20ClF4N7O	Free Base	http://www.selleckchem.com/products/gne-9605.html	S7368
PF-06447475	LRRK2	Autophagy	PF-06447475 is a potent, selective, and brain penetrant LRRK2 kinase inhibitor with IC50 of 3 nM.	305.33	1527473-33-1	C17H15N5O	Free Base	http://selleckchem.com/products/pf-06447475.html	S8202
Tranylcypromine (2-PCPA) HCl	MAO	Epigenetics	Tranylcypromine is a monoamine oxidase inhibitor, which inhibits CYP2A6 with Ki of 0.08 μM and 0.2 μM in cDNA-expressing microsomes and Human Liver Microsomes, respectively.	169.65	4548-34-9	C9H12ClNR	Salt	http://www.selleckchem.com/products/tranylcypromine-2-pcpa-hcl.html	S4246
Safinamide Mesylate	MAO	Metabolism	Safinamide Mesylate is mesylate salt of Safinamide, selectively and reversibly inhibits MAO-B with IC50 of 98 nM, exhibits 5918-fold selectivity against MAO-A. Phase 3.	398.45	202825-46-5	C18H23FN2O5S	Mesylate	http://www.selleckchem.com/products/Safinamide-mesilate.html	S1472
Rasagiline Mesylate	MAO	Metabolism	Rasagiline Mesylate is a new MAO-B inhibitor for the treatment of idiopathic Parkinson's disease.	267.34	161735-79-1	C13H17NO3S	Mesylate	http://www.selleckchem.com/products/rasagiline-mesylate.html	S2102
Moclobemide (Ro 111163)	MAO	Metabolism	Moclobemide is MAO-A (5-HT) inhibitor with IC50 of 6.1 μM.	268.74	71320-77-9	C13H17ClN2O2	Free Base	http://www.selleckchem.com/products/moclobemide.html	S3212
RG-7112	Mdm2	Apoptosis	RG7112 (RO5045337) is an orally bioavailable and selective <b>p53-MDM2</b> inhibitor. Phase 1.	726.28	939981-39-2	C38H48Cl2N4O4S	Free Base	http://www.selleckchem.com/products/rg-7112.html	S7030
Idasanutlin (RG-7388)	Mdm2	Apoptosis	Idasanutlin (RG-7388) is a potent and selective <b>p53-MDM2</b> inhibitor with <b>IC50</b> of 6 nM.	616.48	1229705-06-9	C31H29Cl2F2N3O4	Free Base	http://www.selleckchem.com/products/idasanutlin-rg-7388.html	S7205
PD0325901	MEK	DNA Damage	PD0325901 (PD325901) is selective and non ATP-competitive MEK inhibitor with IC50 of 0.33 nM, roughly 500-fold more potent than CI-1040 on phosphorylation of ERK1 and ERK2. Phase 1/2.	482.19	391210-10-9	C16H14F3IN2O4	Free Base	http://www.selleckchem.com/products/PD-0325901.html	S1036
Selumetinib (AZD6244)	MEK	MAPK	Selumetinib (AZD6244) is a potent, highly selective MEK1 inhibitor with IC50 of 14 nM, also inhibits ERK1/2 phosphorylation with IC50 of 10 nM, no inhibition to p38α, MKK6, EGFR, ErbB2, ERK2, B-Raf, etc. Phase 1/2.	457.68	606143-52-6	C17H15BrClFN4O3	Free Base	http://www.selleckchem.com/products/AZD6244.html	S1008
PD184352 (CI-1040)	MEK	MAPK	CI-1040 (PD 184352) is an ATP non-competitive MEK1/2 inhibitor with IC50 of 17 nM, 100-fold more selective for MEK1/2 than MEK5. Phase 2.	478.67	212631-79-3	C17H14ClF2IN2O2	Free Base	http://www.selleckchem.com/products/CI-1040-(PD184352).html	S1020
BI-847325	MEK	MAPK	BI-847325 is an orally bioavailable, and selective dual <b>MEK/Aurora kinase</b> inhibitor with <b>IC50</b> of 3 nM, 25 nM, 15 nM, 25 nM, and 4 nM for Xenopus laevis Aurora B, human Aurora A and Aurora C, as well as human MEK1 and MEK2, respectively. Phase 1.	464.56	1207293-36-4	C29H28N4O2	Free Base	http://www.selleckchem.com/products/bi-847325.html	S7843
Cobimetinib (GDC-0973, RG7420)	MEK	MAPK	Cobimetinib (GDC-0973, RG7420) is a potent and highly selective <b>MEK1</b> inhibitor with <b>IC50</b> of 4.2 nM. Phase 3.	531.31	934660-93-2	C21H21F3IN3O2	Free Base	http://www.selleckchem.com/products/cobimetinib-gdc-0973-rg7420.html	S8041
Refametinib (RDEA119, Bay 86-9766)	MEK	Others	Refametinib (RDEA119, Bay 86-9766) is a potent, ATP non-competitive and highly selective inhibitor of MEK1 and MEK2 with IC50 of 19 nM and 47 nM, respectively.	572.34	923032-37-5	C19H20F3IN2O5S	Free Base	http://www.selleckchem.com/products/refametinib-rdea119-bay86-9766.html	S1089
U0126-EtOH	MEK	Others	U0126-EtOH is a highly selective inhibitor of MEK1/2 with IC50 of 0.07 μM/0.06 μM, 100-fold higher affinity for ΔN3-S218E/S222D MEK than PD098059.	426.56	1173097-76-1	C20H22N6OS2	Free Base	http://www.selleckchem.com/products/U0126.html	S1102
CW069	Microtubule Associated	Cytoskeletal Signaling	CW069 is an allosteric, and selective inhibitor of microtubule motor protein HSET with IC50 of 75 μM, significant selectivity over KSP.	500.33	1594094-64-0	C23H21IN2O3	Free Base	http://www.selleckchem.com/products/cw069.html	S7336
CK-636	Microtubule Associated	Cytoskeletal Signaling	CK-636 is an Arp2/3 complex inhibitor with IC50 of 4 μM, 24 μM and 32 μM for inhibition of actin polymerization induced by human, fission yeast and bovine Arp2/3 complex, respectively.	284.38	442632-72-6	C16H16N2OS	Free Base	http://www.selleckchem.com/products/ck-636.html	S7497
Batimastat (BB-94)	MMP	Proteases	Batimastat (BB-94) is a potent, broad spectrum matrix metalloprotease (MMP) inhibitor for MMP-1, MMP-2, MMP-9, MMP-7 and MMP-3 with IC50 of 3 nM, 4 nM, 4 nM, 6 nM and 20 nM, respectively.	477.64	130370-60-4	C23H31N3O4S2	Free Base	https://www.selleckchem.com/products/bb-94.html	S7155
SB-3CT	MMP	Proteases	SB-3CT is an effective and selective gelatinase inhibitor with Ki of 13.9 nM and 600 nM for MMP-2 and MMP-9, respectively.	306.4	292605-14-2	C15H14O3S2	Free Base	http://www.selleckchem.com/products/sb-3ct.html	S7430
NSC 405020	MMP	Proteases	NSC 405020 is a noncatalytic inhibitor of MT1-MMP, directly interacts with PEX domain of MT1-MMP, affects PEX homodimerization but not catalytic activity of MT1-MMP.	260.16	7497-07-6	C12H15Cl2NO	Free Base	http://www.selleckchem.com/products/nsc-405020.html	S8072
Temsirolimus (CCI-779, NSC 683864)	mTOR	Neuronal Signaling	Temsirolimus (CCI-779) is a specific mTOR inhibitor with IC50 of 1.76 μM.	1030.29	162635-04-3	C56H87NO16	Free Base	http://www.selleckchem.com/products/Temsirolimus.html	S1044
Everolimus (RAD001)	mTOR	Others	Everolimus (RAD001) is an mTOR inhibitor of FKBP12 with IC50 of 1.6-2.4 nM.	958.22	159351-69-6	C53H83NO14	Free Base	http://www.selleckchem.com/products/Everolimus(RAD001).html	S1120
Ridaforolimus (Deforolimus, MK-8669)	mTOR	PI3K/Akt/mTOR	Ridaforolimus (Deforolimus, MK-8669) is a selective mTOR inhibitor with IC50 of 0.2 nM in HT-1080 cell line; while not classified as a prodrug, mTOR inhibition and FKBP12 binding is similar to rapamycin. Phase 3.	990.21	572924-54-0	C53H84NO14P	Free Base	http://selleckchem.com/products/Deforolimus.html	S1022
CC-223	mTOR	PI3K/Akt/mTOR	CC-223 is a potent, selective, and orally bioavailable mTOR inhibitor with IC50 of 16 nM, >200-fold selectivity over the related PI3K-α. Phase 1/2.	397.47	1228013-30-6	C21H27N5O3	Free Base	http://selleckchem.com/products/cc-223.html	S7886
Sodium 4-Aminosalicylate	NF-κB	NF-κB	Sodium 4-Aminosalicylate is an antibiotic used to treat tuberculosis via NF-κB inhibition and free radical scavenging.	211.15	133-10-8	C7H6NNaO3	Sodium	http://www.selleckchem.com/products/aminosalicylate-sodium.html	S4073
JSH-23	NF-κB	NF-κB	JSH-23 is an inhibitor of NF-κB transcriptional activity with IC50 of 7.1 μM.	240.34	749886-87-1	C16H20N2	Free Base	http://www.selleckchem.com/products/jsh-23.html	S7351
Caffeic Acid Phenethyl Ester	NF-κB	NF-κB	Caffeic acid phenethyl ester is a potent and specific inhibitor of NF-κB activation, and also displays antioxidant, immunomodulatory and antiinflammatory activities.	284.31	104594-70-9	C17H16O4	Free Base	http://www.selleckchem.com/products/caffeic-acid-phenethyl-ester.html	S7414
(+)-MK 801 maleate	NMDAR	Neuronal Signaling	(+)-MK-801 is a potent, selective and non-competitive NMDA receptor antagonist with Kd of 37.2 nM in rat brain membranes	337.37	77086-22-7	C20H19NO4	Free Base	http://www.selleckchem.com/products/mk-801-maleate.html	S2876
ML130 (Nodinitib-1)	NOD1	NF-κB	ML130 is a potent and selective inhibitor of NOD1 with IC50 of 0.56 μM, inhibits NF-κB activation, exhibits 36-fold selectivity over NOD2.	287.34	799264-47-4	C14H13N3O2S	Free Base	http://www.selleckchem.com/products/ml130.html	S2863
Pyrimethamine	NULL	Metabolism	Pyrimethamine is a dihydrofolate reductase(DHFR) inhibitor with an IC50 of 15.4 nM.	248.71	58-14-0	C12H13ClN4	Free Base	http://www.selleckchem.com/products/Pyrimethamine.html	S2006
Ranitidine	NULL	Neuronal Signaling	Ranitidine is a histamine H2-receptor antagonist with IC50 of 3.3 ± 1.4 μM.	350.86	66357-59-3	C13H23ClN4O3S	Hydrochloride	http://www.selleckchem.com/products/Ranitidine-hydrochloride(Zantac).html	S1801
Felodipine	NULL	Transmembrane Transporters	Felodipine is a selective L-type Ca2+ channel blocker with IC50 of 0.15 nM.	384.25	72509-76-3	C18H19Cl2NO4	Free Base	http://www.selleckchem.com/products/Felodipine(Plendil).html	S1885
Trimebutine	Opioid Receptor	Neuronal Signaling	Trimebutine is an agonist of peripheral mu, kappa and delta opiate receptors, used as spasmolytic agent for treatment of both acute and chronic abdominal pain.	387.47	39133-31-8	C22H29NO5	Free Base	http://www.selleckchem.com/products/trimebutine.html	S2085
Naltrexone HCl	Opioid Receptor	Neuronal Signaling	Naltrexone is an opioid receptor antagonist with IC50 of 8 nM used primarily in the management of alcohol dependence and opioid dependence.	377.86	16676-29-2	C20H24ClNO4	HCl	http://www.selleckchem.com/products/naltrexone-hcl.html	S2103
ADL5859 HCl	Opioid Receptor	Others	ADL5859 HCl is a δ-opioid receptor agonist with Ki of 0.8 nM, selectivity against opioid receptor κ, μ, and weak inhibitory activity at the hERG channel. Phase 2.	428.95	850173-95-4	C24H29ClN2O3	Hydrochloride	http://www.selleckchem.com/products/ADL-5859.html	S1139
Telmisartan	Others	Endocrinology & Hormones	Telmisartan (Micardis) is an angiotensin II receptor antagonist (ARB) used in the management of hypertension.	514.62	144701-48-4	C33H30N4O2	Free Base	http://www.selleckchem.com/products/Telmisartan(Micardis).html	S1738
Toremifene Citrate	Others	Endocrinology & Hormones	Toremifene Citrate is an oral selective estrogen receptor modulator (SERM) which helps oppose the actions of estrogen in the body.	598.08	89778-27-8	C32H36ClNO8	Citrate	www.selleckchem.com/products/Toremifene-Citrate(Fareston).html	S1776
PFI-1 (PF-6405761)	Others	Epigenetics	PFI-1 is a selective BET (bromodomain-containing protein) inhibitor for BRD4 with IC50 of 0.22 μM.	347.39	1403764-72-6	C16H17N3O4S	Free Base	http://www.selleckchem.com/products/pfl-1.html	S1216
Entacapone	Others	Epigenetics	Entacapone inhibits catechol-O-methyltransferase(COMT) with IC50 of 151 nM.	305.29	130929-57-6	C14H15N3O5	Free Base	http://www.selleckchem.com/products/entacapone.html	S3147
GSK J4 HCl	Others	Epigenetics	GSK J4 HCl is a cell permeable prodrug of GSK J1, which is the first selective inhibitor of the H3K27 histone demethylase JMJD3 and UTX with IC50 of 60 nM and inactive against a panel of demethylases of the JMJ family.	453.96	1373423-53-0(free base)	C24H28ClN5O2	HCl	http://www.selleckchem.com/products/gsk-j4-hcl.html	S7070
Ramelteon	Others	GPCR & G Protein	Ramelteon is a novel melatonin receptor agonist for human MT1 and MT2 receptors and chick forebrain melatonin receptors with Ki of 14 pM, 112 pM and 23.1 pM, respectively.	259.34	196597-26-9	C16H21NO2	Free Base	http://www.selleckchem.com/products/Ramelteon.html	S1259
SB408124	Others	GPCR & G Protein	SB408124 (Tocris-1963) is a non-peptide antagonist for OX1 receptor with Ki of 57 nM and27 nM in both whole cell and membrane, respectively, exhibits 50-fold selectivity over OX2 receptor.	356.37	288150-92-5	C19H18F2N4O	Free Base	http://www.selleckchem.com/products/SB-408124.html	S1545
Allopurinol	Others	GPCR & G Protein	Allopurinol (Zyloprim) is a xanthine oxidase inhibitor with an IC50 of 7.82±0.12 μM.	136.11	315-30-0	C5H4N4O	Free Base	http://www.selleckchem.com/products/Allopurinol(Zyloprim).html	S1630
Bupivacaine HCl	Others	GPCR & G Protein	Bupivacaine hydrochloride(Marcain) is a more potent cAMP production inhibitor with an IC50 of 2.3 μM	324.89	18010-40-7	C18H29ClN2O	Hydrochloride	selleckchem.com/products/Bupivacaine-hydrochloride(Marcain).html	S2454
Tolfenamic Acid	Others	Neuronal Signaling	Tolfenamic acid is a COX-2 inhibitor with IC50 of 0.2 μM.	261.7	13710-19-5	C14H12ClNO2	Free Base	http://www.selleckchem.com/products/tolfenamic-acid.html	S1959
Ifenprodil Tartrate	Others	Neuronal Signaling	Ifenprodil is an atypical noncompetitive antagonist at the NMDA receptor, it interacts with high affinity at a homogeneous population of NMDA receptors in neonatal rat forebrain with IC50 of 0.3 μM.	475.53	23210-58-4	C46H60N2O10	Tartrate	http://www.selleckchem.com/products/ifenprodil-tartrate.html	S4091
STF-62247	Others	Others	STF-62247 shows selective toxicity and growth inhibition of renal cells lacking VHL; 25-fold greater sensitivity observed for cells with VHL deficiency compared to wild-type (VHL+).	267.35	315702-99-9	C15H13N3S	Free Base	http://selleckchem.com/products/STF-62247.html	S1041
BTZ043 Racemate	Others	Others	BTZ043 racemate is a decaprenylphosphoryl-β-D-ribose 2'-epimerase (DprE1) inhibitor acting as a new antimycobacterial agent that kill Mycobacterium tuberculosis.	431.39	957217-65-1	C17H16F3N3O5S	Racemate	http://www.selleckchem.com/products/BTZ043.html	S1097
Rebamipide	Others	Others	Rebamipide is a cholecystokinin type 1 (CCK1) receptor inhibitor for inhibiting [125I]BH-CCK-8S with IC50 of 37.7 μM.	370.79	90098-04-7	C19H15ClN2O4	Free Base	http://www.selleckchem.com/products/rebamipide.html	S2032
Ozagrel HCl	Others	Others	Ozagrel HCl is a selective thromboxane A2 synthetase enzyme inhibitors with IC50 of 11 nM, used as antiasthmatic agent.	264.71	78712-43-3	C13H13ClN2O2	HCl	http://www.selleckchem.com/products/ozagrel-hydrochloride.html	S2067
Bergenin	Others	Others	Bergenin is trihydroxybenzoic acid glycoside and the C-glycoside of 4-O-methyl gallic acid.	328.27	477-90-7	C14H16O9	Free Base	http://www.selleckchem.com/products/Bergenin-(Cuscutin).html	S2270
TH-302	Others	Others	TH-302 is selective hypoxia-activated prodrug targeting <b>hypoxic</b> regions of solid tumors with <b>IC50</b> of 19 nM, demonstrates 270-fold enhanced cytotoxicity under hypoxia versus their potency under aerobic conditions, stable to cytochrome P450 metabolism.	449.04	918633-87-1	C9H16Br2N5O4P	free base	http://selleckchem.com/products/th-302.html	S2757
Istradefylline	Others	Others	Istradefylline is a selective adenosine A2A receptor (A2AR) antagonist with Ki of 2.2 nM.	384.43	155270-99-8	C20H24N4O4	Free Base	http://www.selleckchem.com/products/istradefylline-kw-6002.html	S2790
ML161	Others	Others	ML-161 is an allosteric inhibitor of PAR1 with IC50 of 0.26 μM.	361.23	423735-93-7	C17H17BrN2O2	Free Base	http://www.selleckchem.com/products/ml-161.html	S2916
HC-030031	Others	Others	HC-030031 is a selective TRPA1 channel blocker that antagonizes AITC- and formalin-evoked calcium influx with IC50 of 6.2 μM and 5.3 μM respectively.	355.39	349085-38-7	C18H21N5O3	Free Base	http://www.selleckchem.com/products/hc-030031.html	S2918
Mebendazole	others	Others	Mebendazole is a synthetic benzimidazole derivate and anthelmintic agent. Mebendazole interferes with the reproduction and survival of helminths by inhibiting the formation of their cytoplasmic microtubules, thereby selectively and irreversibly blocking glucose uptake.	295.29	31431-39-7	C16H13N3O3	Free Base	http://selleckchem.com/products/mebendazole.html	S4610
Lesinurad	others	Others	Lesinurad is a selective uric acid reabsorption inhibitor (SURI) under investigation for treatment of gout in combination with xanthine oxidase inhibitors.	404.28	878672-00-5	C17H14BrN3O2S	Free Base	http://selleckchem.com/products/lesinurad.html	S4640
SC144	Others	Others	SC144 is an orally active small-molecule gp130 inhibitor.	322.3	895158-95-9	C16H11FN6O	Free Base	http://www.selleckchem.com/products/sc144.html	S7124
Motolimod (VTX-2337)	Others	Others	Motolimod (VTX-2337) is a selective and potent Toll-like receptor (TLR) 8 agonist with EC50 of 100 nM, > 50-fold selectivity over TLR7. Phase 2.	458.6	926927-61-9	C28H34N4O2	Free Base	http://selleckchem.com/products/motolimod-vtx-2337.html	S7161
SRPIN340	Others	Others	SRPIN340 is a selective SRPK inhibitor with Ki of 0.89 μM for SRPK1, showing no significant inhibitory activity against more than 140 other kinases..	349.35	218156-96-8	C18H18F3N3O	Free Base	http://www.selleckchem.com/products/srpin340.html	S7270
4μ8C	Others	Others	4μ8C is a potent and selective IRE1 Rnase inhibitor with IC50 of 76 nM.	204.18	14003-96-4	C11H8O4	Free Base	http://www.selleckchem.com/products/4u8c.html	S7272
STF-118804	Others	Others	STF-118804 is a highly specific NAMPT inhibitor.	461.53	894187-61-2	C25H23N3O4S	Free Base	http://www.selleckchem.com/products/stf-118804.html	S7316
AZ191	Others	Others	AZ191 is a potent and selective DYRK1B inhibitor with IC50 of 17 nM in a cell-free assay, about 5- and 110-fold selectivity over DYRK1A and DYRK2, respectively.	429.52	1594092-37-1	C24H27N7O	Free Base	http://selleckchem.com/products/az191.html	S7338
AZD3965	others	Others	AZD3965 is a potent, selective and orally available monocarboxylate transporter 1 (MCT1) inhibitor with a binding affinity of 1.6 nM, 6-fold selective over MCT2. Phase 1.	515.51	1448671-31-5	C21H24F3N5O5S	Free Base	http://selleckchem.com/products/azd3965.html	S7339
Atglistatin	Others	Others	Atglistatin is a highly potent, and selective inhibitor of adipose triglyceride lipase (ATGL) with IC50 of 0.7 μM, high selectivity over other key metabolic lipases.	283.37	1469924-27-3	C17H21N3O	Free Base	http://www.selleckchem.com/products/atglistatin.html	S7364
4EGI-1	Others	Others	4EGI-1 is a competitive eIF4E/eIF4G interaction inhibitor by binding to eIF4E with KD of 25 μM.	451.28	315706-13-9	C18H12Cl2N4O4S	Free Base	http://www.selleckchem.com/products/4egi-1.html	S7369
4E1RCat	Others	Others	4E1RCat is a dual inhibitor of eIF4E:eIF4G and eIF4E:4E-BP1 interaction, and inhibits the binding of eIF4G to eIF4E with IC50 of 3.2 μM.	478.45	328998-25-0	C28H18N2O6	Free Base	http://www.selleckchem.com/products/4e1rcat.html	S7370
PTC-209	Others	Others	PTC-209 is a potent and selective BMI-1 inhibitor with IC50 of 0.5 μM, and results in irreversible reduction of cancer-initiating cells (CICs).	495.19	315704-66-6	C17H13Br2N5OS	Free Base	http://www.selleckchem.com/products/ptc-209.html	S7372
CGP 57380	Others	Others	CGP 57380 is potent MNK1 inhibitor with IC50 of 2.2 μM, exhibiting no inhibitory activity on p38, JNK1, ERK1 and -2, PKC, or c-Src-like kinases.	244.23	522629-08-9	C11H9FN6	Free Base	http://www.selleckchem.com/products/cgp57380.html	S7421
NH125	Others	Others	NH125 is a selective eEF-2 kinase inhibitor with IC50 of 60 nM, >125-fold selectivity over PKC, PKA, and CaMKII, and also a potent histidine kinase inhibitor.	524.56	278603-08-0	C27H45IN2	Free Base	http://www.selleckchem.com/products/nh125.html	S7436
Sal003	Others	Others	Sal003 is a potent and cell-permeable eIF-2α phosphatase inhibitor.	463.21	1164470-53-4	C18H15Cl4N3OS	Free Base	http://www.selleckchem.com/products/sal003.html	S7437
XEN445	Others	Others	XEN445 is a potent and selective <b>endothelial lipase</b> inhibitor with <b>IC50</b> of 0.237 μM.	366.33	1515856-92-4	C18H17F3N2O3R	Free Base	http://www.selleckchem.com/products/xen445.html	S7457
HJC0350	Others	Others	HJC0350 is a potent and selective EPAC2 inhibitor with IC50 of 0.3 μM, exhibiting no inhibition on Epac1.	277.38	885434-70-8	C15H19NO2S	Free Base	http://www.selleckchem.com/products/hjc0350.html	S7500
(S)-crizotinib	Others	Others	(S)-crizotinib, the (S)-enantiomer of crizotinib, is a potent MTH1 (NUDT1) inhibitor with IC50 of 72 nM.	450.34	1374356-45-2	C21H22Cl2FN5O	Free Base	http://www.selleckchem.com/products/s-crizotinib.html	S7505
AZD7545	Others	Others	AZD7545 is a potent PDHK inhibitor with IC50 of 36.8 nM and 6.4 nM for PDHK1 and PDHK2, respectively.	478.87	252017-04-2	C19H18ClF3N2O5S	Free Base	http://www.selleckchem.com/products/azd7545.html	S7517
BAPTA-AM	Others	Others	BAPTA-AM is a selective, membrane-permeable calcium chelator.	764.68	126150-97-8	C34H40N2O18	Free Base	http://www.selleckchem.com/products/bapta-am.html	S7534
PTC-209 HBr	Others	Others	PTC-209 HBr is the hydrobromide salt of PTC-209, which is a potent and selective BMI-1 inhibitor with IC50 of 0.5 μM, and results in irreversible reduction of cancer-initiating cells (CICs).	576.1	1217022-63-3	C17H14Br3N5OS	Free Base	http://www.selleckchem.com/products/ptc-209-hbr.html	S7539
N6022	Others	Others	N6022 is a selective, and reversible inhibitor of S-nitrosoglutathione reductase (GSNOR) with IC50 of 8 nM and Ki of 2.5 nM. Phase 1/2.	414.46	1208315-24-5	C24H22N4O3	Free Base	http://www.selleckchem.com/products/n6022.html	S7589
TH287	Others	Others	TH287 is a potent and selective <b>MTH1 (NUDT1)</b> inhibitor with <b>IC50</b> of 0.8 nM.	269.13	1609960-30-6	C11H10Cl2N4	Free Base	http://www.selleckchem.com/products/th287.html	S7631
TH588	others	Others	TH588 is a potent and selective MTH1 (NUDT1) inhibitor with IC50 of 5 nM.	295.17	1609960-31-7	C13H12Cl2N4	Free Base	http://selleckchem.com/products/th588.html	S7632
CB-839	Others	Others	CB-839 is a potent, selective, and orally bioavailable <b>glutaminase</b> inhibitor with <b>IC50</b> of 24 nM for recombinant human GAC. Phase 1.	571.57	1439399-58-2	C26H24F3N7O3S	Free Base	http://www.selleckchem.com/products/cb-839.html	S7655
SecinH3	Others	Others	SecinH3 is a selective <b>cytohesin</b> inhibitor with <b>IC50</b> of 2.4 μM, 5.4 μM, 5.4 μM, 5.6 μM, 5.6 μM, and 65 μM for hCyh2, hCyh1, mCyh3, hCyh3, drosophila steppke, and yGea2-S7, respectively.	460.5	853625-60-2	C24H20N4O4S	Free Base	http://www.selleckchem.com/products/secinh3.html	S7685
BPTES	Others	Others	BPTES is a potent and selective <b>Glutaminase GLS1 (KGA)</b> inhibitor with <b>IC50</b> of 0.16 μM.	524.68	314045-39-1	C24H24N6O2S3	Free Base	http://www.selleckchem.com/products/bptes.html	S7753
AI-10-49	Others	Others	AI-10-49 is a selective inhibitor of the binding of CBFβ-SMMHC to RUNX1 with IC50 of 260 nM.	660.52	1256094-72-0	C30H22F6N6O5	Free Base	http://selleckchem.com/products/ai-10-49.html	S7814
Tiplaxtinin (PAI-039)	Others	Others	Tiplaxtinin(PAI-039) is an orally efficacious and selective plasminogen activator inhibitor-1 (<b>PAI-1</b>) inhibitor with <b>IC50</b> of 2.7 μM.	439.38	393105-53-8	C24H16F3NO4	Free Base	http://www.selleckchem.com/products/tiplaxtinin-pai-039.html	S7922
STF-31	Others	Others	STF-31 is a selective glucose transporter <b>GLUT1</b> inhibitor.	423.53	724741-75-7	C23H25N3O3S	Free Base	http://www.selleckchem.com/products/stf-31.html	S7931
ML264	Others	Others	ML264, a selectively inhibitor of kruppel-like factor 5 (KLF5),potently Inhibits Growth of Colorectal Cancer.	384.88	1550008-55-3	C17H21ClN2O4S	Free Base	http://selleckchem.com/products/ml264.html	S8196
L-NAME HCl	Others	Others	L-NAME is a nonselective inhibitor of nitric oxide synthetases (NOS) for nNOS (bovine), eNOS (human), and iNOS (murine), with Ki of 15 nM, 39 nM and 4.4 μM, respectively.	269.69	51298-62-5	C7H16ClN5O4	HCl	http://selleckchem.com/products/l-name-hcl.html	S2877
Hygromycin B	Others	Others	Hygromycin B, a selective antibiotic that is effective on most bacteria, fungi and higher eukaryotes, inhibits protein synthesis by interfering with translocation and causing mistranslation at the 70S ribosome.	527.52	31282-04-9	C20H37N3O13	Free Base	http://selleckchem.com/products/hygromycin-b.html	S2908
Eflornithine hydrochloride hydrate	others	Others	Eflornithine(Difluoromethylornithine) inhibits polyamine biosynthesis by the selective, irreversible inhibition of ornithine decarboxylase (ODC). A chemoprotective agent that blocks angiogenesis. Its biological half-life is 8 hours.	236.64	96020-91-6	C6H15ClF2N2O3	Salt	http://selleckchem.com/products/eflornithine-hydrochloride-hydrate.html	S4582
Rilmenidine Phosphate	Others	Others	Rilmenidine Phosphate is a selective I(1) imidazoline receptor agonist, used for the treatment of hypertension.	278.24	85409-38-7	C10H19N2O5P	Salt	http://selleckchem.com/products/rilmenidine-phosphate.html	S7548
Alvelestat (AZD9668)	Others	Proteases	Alvelestat (AZD9668) is an oral, highly selective inhibitor of neutrophil elastase (NE) with IC50 and Ki of 12 nM and 9.4 nM, at least 600-fold more selective over other serine proteases. Phase 2.	545.53	848141-11-7	C24H20F3N5O4S	Free Base	http://www.selleckchem.com/products/avelestat-azd9668.html	S7218
VX-809 (Lumacaftor)	Others	Transmembrane Transporters	VX-809 acts to correct CFTR mutations common in cystic fibrosis by increasing mutant CFTR (F508del-CFTR) maturation,EC50 of 0.1 μM. Phase 3.	452.41	936727-05-8	C24H18F2N2O5	Free Base	http://www.selleckchem.com/products/VX-809.html	S1565
Gliclazide	Others	Transmembrane Transporters	Gliclazide (Diamicron) is a whole-cell beta-cell ATP-sensitive potassium currents blocker with an IC50 of 184 ± 30 nM.	323.41	21187-98-4	C15H21N3O3S	Free Base	http://www.selleckchem.com/products/gliclazide-diamicron.html	S2601
Gliquidone	Others	Transmembrane Transporters	Gliquidone is an ATP-sensitive K+ channel antagonist with IC50 of 27.2 nM.	527.63	33342-05-1	C27H33N3O6S	Free Base	http://www.selleckchem.com/products/gliquidone.html	S3151
Ataluren (PTC124)	Others	Transmembrane Transporters	PTC124 (Ataluren) selectively induces ribosomal read-through of premature but not normal termination codons, with EC50 of 0.1 μM, may provide treatment for genetic disorders caused by nonsense mutations (e.g. CF caused by CFTR nonsense mutation). Phase 3.	284.24	775304-57-9	C15H9FN2O3	Free Base	http://www.selleckchem.com/products/PTC124.html	S6003
(-)-Parthenolide	Others	Ubiquitin	(-)-Parthenolide is a sesquiterpene lactone which occurs naturally in the plant feverfew(Tanacetum parthenium) and also promotes the ubiquitination of MDM2 and activates p53 cellular functions.	248.32	20554-84-1	C15H20O3	Free Base	http://www.selleckchem.com/products/Parthenolide((-)-Parthenolide).html	S2341
MNS (3,4-Methylenedioxy-β-nitrostyrene, MDBN)	Others	Ubiquitin	MNS is a tyrosine kinases inhibitor, inhibits Syk, Src, p97 with IC50 of 2.5 μM, 29.3 μM and 1.7 μM, respectively.	193.16	1485-00-3	C9H7NO4	Free Base	http://www.selleckchem.com/products/mdbn.html	S4921
DBeQ	Others	Ubiquitin	DBeQ is a selective, potent, reversible, and ATP-competitive p97 inhibitor with IC50 of 1.5 μM.	340.42	177355-84-9	C22H20N4	Free Base	http://www.selleckchem.com/products/dbeq.html	S7199
Suvorexant (MK-4305)	OX Receptor	GPCR & G Protein	Suvorexant (MK-4305) is a potent dual OX receptor antagonist with Ki of 0.55 nM and 0.35 nM for OX1 receptor and OX2 receptor, respectively. Phase 3.	450.92	1030377-33-3	C23H23ClN6O2	Free Base	http://www.selleckchem.com/products/suvorexant-mk.html	S7279
SB-334867	OX Receptor	GPCR & G Protein	SB-334867 is a selective <b>orexin-1 (OX1) receptor</b> antagonist.	319.32	792173-99-0	C17H13N5O2	Free Base	http://www.selleckchem.com/products/sb-334867.html	S7585
Zosuquidar (LY335979) 3HCl	P-gp	Transmembrane Transporters	Zosuquidar (LY335979) is a potent modulator of P-glycoprotein-mediated multi-drug resistance with Ki of 60 nM. Phase 3.	636.99	167465-36-3	C32H34Cl3F2N3O2	Hydrochloride	http://www.selleckchem.com/products/LY335979.html	S1481
Tariquidar	P-gp	Transmembrane Transporters	Tariquidar (XR9576) is a potent and selective noncompetitive inhibitor of P-glycoprotein with Kd of 5.1 nM, reverses drug resistance in MDR cell Lines. Phase 3.	646.73	206873-63-4	C38H38N4O6	Free Base	http://www.selleckchem.com/products/tariquidar.html	S8028
MRS 2578	P2 Receptor	Neuronal Signaling	MRS2578 is a potent P2Y6 receptor antagonist with IC50 of 37 nM, exhibits insignificant activity at P2Y1, P2Y2, P2Y4,and P2Y11 receptors.	472.67	711019-86-2	C20H20N6S4	Free Base	http://www.selleckchem.com/products/mrs-2578.html	S2855
Ticagrelor	P2 Receptor	Neuronal Signaling	Ticagrelor is the first reversibly binding oral P2Y12 receptor antagonist, also inhibits CYP2C9 and 4-hydroxylation with IC50 of 10.5 μM and 8.2 μM respectively.	522.57	274693-27-5	C23H28F2N6O4S	Free Base	http://www.selleckchem.com/products/ticagrelor.html	S4079
A-438079 HCl	P2 Receptor	Neuronal Signaling	A-438079 HCl is a potent, and selective <b>P2X7 receptor</b> antagonist with <b>pIC50</b> of 6.9.	342.61	899431-18-6	C13H10Cl3N5	Salt	http://www.selleckchem.com/products/a-438079-hcl.html	S7705
VX-745	p38 MAPK	MAPK	VX-745 is a potent and selective inhibitor of p38α with IC50 of 10 nM, 22-fold greater selectivity versus p38β and no inhibition to p38γ.	436.26	209410-46-8	C19H9Cl2F2N3OS	Free Base	http://www.selleckchem.com/products/VX-745.html	S1458
Losmapimod (GW856553X)	p38 MAPK	MAPK	Losmapimod (GW856553X) is a selective, potent, and orally active p38 MAPK inhibitor with pKi of 8.1 and 7.6 for p38α and p38β, respectively. Phase 3.	383.46	585543-15-3	C22H26FN3O2	Free Base	http://www.selleckchem.com/products/losmapimod.html	S7215
SB239063	p38 MAPK	MAPK	SB239063 is a potent and selective <b>p38 MAPKα/β</b> inhibitor with <b>IC50</b> of 44 nM, showing no activity against the γ- and δ-kinase isoforms.	368.4	193551-21-2	C20H21FN4O2	Free Base	http://www.selleckchem.com/products/sb239063.html	S7741
BMS-582949	p38 MAPK	MAPK	BMS-582949 is a potent and selective p38 mitogen-activated protein kinase (p38 MAPK) inhibitor with IC50 of 13nM,inhibiting both p38 kinase activity and activation of p38.	406.48	623152-17-0	C22H26N6O2	Free Base	http://selleckchem.com/products/bms-582949.html	S8124
LY2228820	p38 MAPK	MAPK	LY2228820 is a novel and potent inhibitor of p38 MAPK with IC50 of 7 nM, does not alter p38 MAPK activation. Phase 1/2.	612.74	862507-23-1	C26H37FN6O6S2	Dimesylate	http://www.selleckchem.com/products/LY2228820.html	S1494
SB203580	p38 MAPK	Transmembrane Transporters	SB203580 is a p38 MAPK inhibitor with IC50 of 0.3-0.5 μM, 10-fold less sensitive to SAPK3(106T) and SAPK4(106T) and blocks PKB phosphorylation with IC50 of 3-5 μM.	377.43	152121-47-6	C21H16FN3OS	Free Base	http://www.selleckchem.com/products/SB-203580.html	S1076
TAK-700 (Orteronel)	P450	Metabolism	TAK-700 (Orteronel) is a potent and highly selective human 17,20-lyase inhibitor with IC50 of 38 nM, exhibits >1000-fold selectivity over other CYPs (e.g. 11-hydroxylase and CYP3A4). Phase 3.	307.35	566939-85-3	C18H17N3O2	Free Base	http://www.selleckchem.com/products/TAK-700.html	S1195
Voriconazole	P450	Metabolism	Voriconazole is a new triazole derivative similar to fluconazole and itraconazole that acts by inhibiting fungal cytochrome P-450-dependent, 14-alpha-sterol demethylase-mediated synthesis of ergosterol.	349.31	137234-62-9	C16H14F3N5O	Free Base	http://www.selleckchem.com/products/Voriconazole.html	S1442
Apigenin	P450	Metabolism	Apigenin is a potent P450 inhibitor for CYP2C9 with IC50 of 23 pM.	270.24	520-36-5	C15H10O5	Free Base	http://www.selleckchem.com/products/Apigenin.html	S2262
Pifithrin-μ	p53	Apoptosis	Pifithrin-μ is a specific p53 inhibitor by reducing its affinity to Bcl-xL and Bcl-2, and also inhibits HSP70 function and autophagy.	181.21	64984-31-2	C8H7NO2S	Free Base	http://www.selleckchem.com/products/pifithrin-u.html	S2930
Tenovin-6	p53	Apoptosis	Tenovin-6 is a small molecule activator of p53 transcriptional activity.	454.63	1011557-82-6	C25H35ClN4O2S	HCl salt	http://www.selleckchem.com/products/tenovin-6.html	S4900
NSC 319726	p53	Apoptosis	NSC319726 is a p53(R175) mutant reactivator, exhibits growth inhibition in cells expressing mutant p53, with IC50 of 8 nM for p53(R175) mutant, shows no inhibition for p53 wild-type cells.	234.32	71555-25-4	C11H14N4S	Free Base	http://www.selleckchem.com/products/nsc319726.html	S7149
NMS-873	p97	Ubiquitin	NMS-873 is an allosteric and specific p97 inhibitor with IC50 of 30 nM.	520.67	1418013-75-8	C27H28N4O3S2	Free Base	http://www.selleckchem.com/products/nms-873.html	S7285
NVP-TNKS656	PAFR	DNA Damage	NVP-TNKS656 is a highly potent, selective, and orally active tankyrase inhibitor with IC50 of 6 nM for TNKS2, > 300-fold selectivity against PARP1 and PARP2.	494.58	1419949-20-4	C27H34N4O5	Free Base	http://selleckchem.com/products/nvp-tnks656.html	S7238
Ginkgolide B	PAFR	Others	Ginkgolide B is a PAFR antagonist with IC50 of 3.6 μM.	424.4	15291-77-7	C20H24O10	Free Base	http://www.selleckchem.com/products/Ginkgolide-B.html	S1343
IPA-3	PAK	Cytoskeletal Signaling	IPA-3 is a selective non-ATP competitive Pak1 inhibitor with IC50 of 2.5 μM, no inhibition to group II PAKs (PAKs 4-6).	350.45	42521-82-4	C20H14O2S2	Free Base	https://www.selleckchem.com/products/ipa-3.html	S7093
Veliparib (ABT-888)	PARP	DNA Damage	Veliparib (ABT-888) is a potent inhibitor of PARP1 and PARP2 with Ki of 5.2 nM and 2.9 nM, respectively. It is inactive to SIRT2. Phase 1/2.	244.29	912444-00-9	C13H16N4O	Free Base	http://www.selleckchem.com/products/ABT-888.html	S1004
AG-14361	PARP	DNA Damage	AG14361 is a potent inhibitor of PARP1 with Ki of <5 nM. It is at least 1000-fold more potent than the benzamides.	320.39	328543-09-5	C19H20N4O	Free Base	http://www.selleckchem.com/products/AG14361.html	S2178
AZD2461	PARP	DNA Damage	AZD2461 is a novel PARP inhibitor with low affinity for Pgp than Olaparib. Phase 1.	395.43	1174043-16-3	C22H22FN3O3	Free Base	https://www.selleckchem.com/products/azd2461.html	S7029
MK-4827(Niraparib) tosylate	PARP	DNA Damage	MK-4827(Niraparib) tosylate is a selective inhibitor of PARP1/PARP2 with IC50 of 3.8 nM/2.1 nM.	492.59	1038915-73-9	C26H28N4O4S	4-?methylbenzen	http://selleckchem.com/products/mk-4827-niraparib-tosylate.html	S7625
Iniparib (BSI-201)	PARP	Others	BSI-201 (Iniparib, SAR240550) is a PARP1 inhibitor with demonstrated effectiveness in triple-negative breast cancer (TNBC). Phase 3.	292.03	160003-66-7	C7H5IN2O3	Free Base	http://www.selleckchem.com/products/BSI-201.html	S1087
Rolipram	PDE	Metabolism	Rolipram is a PDE4-inhibitor and an anti-inflammatory agent.Phase 1.	275.34	61413-54-5	C16H21NO3	Free Base	http://www.selleckchem.com/products/Rolipram.html	S1430
Cilomilast	PDE	Metabolism	Cilomilast is a potent PDE4 inhibitor with IC50 of about 110 nM, has anti-inflammatory activity and low central nervous system activity.	343.42	153259-65-5	C20H25NO4	Free Base	http://www.selleckchem.com/products/Cilomilast(SB-207499).html	S1455
Tadalafil	PDE	Metabolism	Tadalafil is a PDE-5 inhibitor with IC50 of 1.8 nM.	389.4	171596-29-5	C22H19N3O4	Free Base	http://www.selleckchem.com/products/Tadalafil(Cialis).html	S1512
Pimobendan	PDE	Metabolism	Pimobendan is a selective inhibitor of PDE3 with IC50 of 0.32 μM.	334.37	74150-27-9	C19H18N4O2	Free Base	http://www.selleckchem.com/products/Pimobendan(Vetmedin).html	S1550
PF-2545920	PDE	Metabolism	PF-2545920 is a potent and selective <b>PDE10A</b> inhibitor with <b>IC50</b> of 0.37 nM, with >1000-fold selectivity over the PDE.	392.45	1292799-56-4	C25H20N4O	Free Base	http://www.selleckchem.com/products/pf-2545920.html	S2687
CP-673451	PDGFR	Protein Tyrosine Kinase	CP 673451 is a selective inhibitor of PDGFRα/β with IC50 of 10 nM/1 nM, exhibits >450-fold selectivity over other angiogenic receptors, has antiangiogenic and antitumor activity.	417.5	343787-29-1	C24H27N5O2	Free Base	http://www.selleckchem.com/products/CP-673451.html	S1536
Crenolanib (CP-868596)	PDGFR	Protein Tyrosine Kinase	Crenolanib (CP-868596) is a potent and selective inhibitor of PDGFRα/β with Kd of 2.1 nM/3.2 nM, also potently inhibits FLT3, sensitive to D842V mutation not V561D mutation, >100-fold more selective for PDGFR than c-Kit, VEGFR-2, TIE-2, FGFR-2, EGFR, erbB2, and Src.	443.54	670220-88-9	C26H29N5O2	Free Base	http://www.selleckchem.com/products/crenolanib-cp-868596.html	S2730
OSU-03012 (AR-12)	PDK-1	Others	OSU-03012 is a potent inhibitor of recombinant PDK-1 with IC50 of 5 μM and 2-fold increase in potency over OSU-02067.	460.45	742112-33-0	C26H19F3N4O	Free Base	http://www.selleckchem.com/products/OSU-03012.html	S1106
BX-912	PDK-1	PI3K/Akt/mTOR	BX912 is a potent and specific PDK1 inhibitor with IC50 of 12 nM, 9- and 105- fold greater selectivity for PDK1 than PKA and PKC, respectively. In comparison to GSK3β, selectivity for PDK1 is 600-fold.	471.35	702674-56-4	C20H23BrN8O	Free Base	http://www.selleckchem.com/products/bx-912.html	S1275
GSK2656157	PERK	Apoptosis	GSK2656157 is an ATP-competitive and highly selective inhibitor of PERK with IC50 of 0.9 nM, 500-fold greater against a panel of 300 kinases.	416.45	1337532-29-2	C23H21FN6O	Free Base	http://www.selleckchem.com/products/gsk2656157.html	S7033
GSK2606414	PERK	Apoptosis	GSK2606414 is an orally available, potent, and selective PERK inhibitor with IC50 of 0.4 nM, displaying at least 100-fold selectivity over the other EIF2AKs assayed.	451.44	1337531-36-8	C24H20F3N5O	Free Base	http://www.selleckchem.com/products/gsk2606414.html	S7307
Varespladib (LY315920)	Phospholipase	Others	LY315920 (Varespladib) is a potent and selective human non-pancreatic secretory phospholipase A2 (hnsPLA) inhibitor with IC50 of 7 nM,. Phase 3.	380.39	172732-68-2	C21H20N2O5	Free Base	http://www.selleckchem.com/products/LY315920(Varespladib).html	S1110
CP-91149	Phosphorylase	Metabolism	CP-91149 is a selective glycogen phosphorylase (GP) inhibitor with IC50 of 0.13 μM in the presence of glucose, 5- to 10-fold less potent in the absence of glucose.	399.87	186392-40-5	C21H22ClN3O3	Free Base	http://www.selleckchem.com/products/cp-91149.html	S2717
GDC-0941	PI3K	Metabolism	GDC-0941 is a potent inhibitor of PI3Kα/δ with IC50 of 3 nM, with modest selectivity against p110β (11-fold) and p110γ (25-fold).	513.64	957054-30-7	C23H27N7O3S2	Free Base	http://www.selleckchem.com/products/GDC-0941.html	S1065
TG100-115	PI3K	PI3K/Akt/mTOR	TG100115 is a PI3Kγ/δ inhibitor with IC50 of 83 nM/235 nM, with little effect on PI3Kα/β. Phase 1/2.	346.34	677297-51-7	C18H14N6O2	Free Base	http://www.selleckchem.com/products/TG100-115.html	S1352
AZD6482	PI3K	PI3K/Akt/mTOR	AZD6482 is a PI3Kβ inhibitor with IC50 of 10 nM, 8-, 87- and 109-fold more selective to PI3Kβ than PI3Kδ, PI3Kα and PI3Kγ. Phase 1.	408.45	1173900-33-8	C22H24N4O4	Free Base	http://www.selleckchem.com/products/azd6482.html	S1462
AS-252424	PI3K	PI3K/Akt/mTOR	AS-252424 is a novel, potent PI3Kγ inhibitor with IC50 of 30 nM with 30-fold selectivity for PI3Kγ than PI3Kα, and low inhibitory activity towards PI3Kδ/β.	305.28	900515-16-4	C14H8FNO4S	Free Base	http://www.selleckchem.com/products/as-252424.html	S2671
VS-5584 (SB2343)	PI3K	PI3K/Akt/mTOR	VS-5584 (SB2343) is a potent and selective dual PI3K/mTOR inhibitor for mTOR, PI3Kα/β/δ/γ with IC50 of 3.4 nM and 2.6-21 nM, respectively. Phase 1.	354.41	1246560-33-7	C17H22N8O	Free Base	http://www.selleckchem.com/products/vs-5584-sb2343.html	S7016
GSK2292767	PI3K	PI3K/Akt/mTOR	GSK2292767 is a potent and selective PI3Kδ inhibitor.	512.58	1254036-66-2	C24H28N6O5S	Free Base	http://selleckchem.com/products/gsk2292767.html	S7938
VPS34-IN1	PI3K	PI3K/Akt/mTOR	Vps34-IN1 is a potent and highly selective Vps34 inhibitor with IC50 of 25 nM invitro,which does not significantly inhibit the isoforms of class I as well as class II PI3Ks.	425.91	1383716-33-3	C21H24ClN7O	Free Base	http://selleckchem.com/products/vps34-in1.html	S7980
AZD8186	PI3Kβ, PI3Kδ	PI3K/Akt/mTOR	AZD8186 is a potent and selective inhibitor of PI3Kβ and PI3Kδ with <b>IC50</b> of 4 nM and 12 nM, respectively. Phase 1.	457.47	1627494-13-6	C24H25F2N3O4	Free Base	http://www.selleckchem.com/products/azd8186.html	S7694
SGI-1776 free base	Pim	JAK/STAT	SGI-1776 is a novel ATP competitive inhibitor of Pim1 with IC50 of 7 nM, 50- and 10-fold selective versus Pim2 and Pim3, also potent to Flt3 and haspin. Phase 1.	405.42	1025065-69-3	C20H22F3N5O	Free Base	http://www.selleckchem.com/products/SGI-1776.html	S2198
SMI-4a	Pim	JAK/STAT	SMI-4a is a potent inhibitor of Pim1 with IC50 of 17 nM, modest potent to Pim-2, does not significantly inhibit other serine/threonine- or tyrosine-kinases.	273.23	438190-29-5	C11H6F3NO2S	Free Base	http://www.selleckchem.com/products/smi-4a.html	S8005
Enzastaurin (LY317615)	PKC	Neuronal Signaling	Enzastaurin (LY317615) is a potent PKCβ selective inhibitor with IC50 of 6 nM, 6- to 20-fold selectivity against PKCα, PKCγ and PKCε. Phase 3.	515.61	170364-57-5	C32H29N5O2	Free Base	http://www.selleckchem.com/products/Enzastaurin.html	S1055
Sotrastaurin	PKC	TGF-beta/Smad	Sotrastaurin is a potent and selective pan-PKC inhibitor, mostly for PKCθ with Ki of 0.22 nM; inactive to PKCζ. Phase 1/2.	438.48	425637-18-9	C25H22N6O2	Free Base	http://www.selleckchem.com/products/sotrastaurin-aeb071.html	S2791
Go 6983	PKC	TGF-beta/Smad	Go 6983 is a pan-PKC inhibitor against for PKCα, PKCβ, PKCγ and PKCδ with IC50 of 7 nM, 7 nM, 6 nM and 10 nM, respectively; less potent to PKCζ and inactive to PKCμ.	442.51	133053-19-7	C26H26N4O3	Free Base	http://www.selleckchem.com/products/go-6983.html	S2911
Rigosertib (ON-01910)	PLK	Cell Cycle	Rigosertib (ON-01910) is a non-ATP-competitive inhibitor of PLK1 with IC50 of 9 nM. It shows 30-fold greater selectivity against Plk2 and no activity to Plk3. Phase 3.	473.47	1225497-78-8	C21H24NNaO8S	Sodium Salt	http://www.selleckchem.com/products/ON-01910.html	S1362
GSK461364	PLK	Cell Cycle	GSK461364 inhibits purified Plk1 with Ki of 2.2 nM. It is more than 1000-fold selective against Plk2/3. Phase 1.	543.6	929095-18-1	C27H28F3N5O2S	Free Base	http://www.selleckchem.com/products/GSK461364.html	S2193
Ro3280	PLK	Cell Cycle	RO3280 is a potent, highly selective inhibitor of Polo-like kinase 1 (PLK1) with IC50 of 3 nM.	543.61	1062243-51-9	C27H35F2N7O3	Free Base	http://www.selleckchem.com/products/ro3280.html	S7248
NMS-P937 (NMS1286937)	PLK	Cell Cycle	NMS-P937 (NMS1286937) is an orally available, selective Polo-like Kinase 1 (PLK1) inhibitor with IC50 of 2 nM, 5000-fold selectivity over PLK2/PLK3. Phase 1.	532.52	1034616-18-6	C24H27F3N8O3	Free Base	http://selleckchem.com/products/nms-p937-nms1286937.html	S7255
SBE 13 HCl	PLK	Cell Cycle	SBE 13 HCl is a potent and selective <b>PLK1</b> inhibitor with <b>IC50</b> of 200 pM, >4000-fold selectivity over Aurora A kinase, Plk2 and Plk3.	479.4	1052532-15-6	C24H28Cl2N2O4	Salt	http://www.selleckchem.com/products/sbe-13-hcl.html	S7720
BI 2536	PLK	Others	BI2536 is a potent Plk1 inhibitor with IC50 of 0.83 nM. It shows 4- and 11-fold greater selectivity against Plk2 and Plk3. Phase 2.	521.66	755038-02-9	C28H39N7O3	Free Base	http://www.selleckchem.com/products/BI-2536.html	S1109
ML133 HCl	Potassium Channel	Transmembrane Transporters	ML133 is a selective potassium channel inhibitor for Kir2.1 with IC50 of 1.8 μM (pH 7.4) and 290 nM (pH 8.5), has no effect on Kir1.1 and weak activity for Kir4.1 and Kir7.1.	313.82	1222781-70-5	C19H20ClNO	Hydrochloride	http://www.selleckchem.com/products/Ml-133-hcl.html	S2825
T0070907	PPAR	DNA Damage	T0070907 is a potent and selective PPARγ inhibitor with IC50 of 1 nM, with a >800-fold selectivity over PPARα and PPARδ.	277.66	313516-66-4	C12H8ClN3O3	Free Base	http://www.selleckchem.com/products/t0070907.html	S2871
GW9662	PPAR	DNA Damage	GW9662 is a selective PPAR antagonist for PPARγ with IC50 of 3.3 nM, with at least 100 to 1000-fold functional selectivity in cells with PPARγversus PPARα and PPARδ.	276.68	22978-25-2	C13H9ClN2O3	Free Base	http://www.selleckchem.com/products/gw9662.html	S2915
Rosiglitazone maleate	PPAR	Metabolism	Rosiglitazone, a member of the thiazolidinedione class of antihyperglycaemic agents, is a high-affinity selective agonist of the <b>peroxisome proliferator-activated receptor-γ</b>.	473.5	155141-29-0	C22H23N3O7S	Maleate	http://www.selleckchem.com/products/Rosiglitazone-maleate.html	S2505
GW0742	PPAR	Metabolism	GW0742 is a potent and highly selective PPARβ/δ agonist, with IC50 of 1 nM, with 1000-fold selectivity over hPPARα and hPPARγ.	471.49	317318-84-6	C21H17F4NO3S2	Free Base	http://www.selleckchem.com/products/gw0742.html	S8020
CEP-18770 (Delanzomib)	Proteasome	Others	CEP-18770 is an orally active inhibitor of the chymotrypsin-like activity of proteasome with IC50 of 3.8 nM, with only marginal inhibition of the tryptic and peptidylglutamyl activities of the proteosome. Phase 1/2.	413.28	847499-27-8	C21H28BN3O5	Free Base	http://www.selleckchem.com/products/cep-18770.html	S1157
MLN2238	Proteasome	Proteases	MLN2238 inhibits the chymotrypsin-like proteolytic (β5) site of the 20S proteasome with IC50 and Ki of 3.4 nM and 0.93 nM, respectively, also inhibits the caspase-like (β1) and trypsin-like (β2) proteolytic sites, with IC50 of 31 and 3500 nM.	361.03	1072833-77-2	C14H19BCl2N2O4	Free Base	http://www.selleckchem.com/products/MLN-2238.html	S2180
Epoxomicin	Proteasome	Proteases	Epoxomicin is a selective proteasome inhibitor with anti-inflammatory activity, inhibits primarily the CH-L activity of the 20S proteasome, while T-L and PGPH catalytic activities are also inhibited at 100- and 1000-fold reduced rate.	554.72	134381-21-8	C28H50N4O7	Free Base	http://selleckchem.com/products/epoxomicin-bu-4061t.html	S7038
PI-1840	Proteasome	Proteases	PI-1840 is a reversible and selective chymotrypsin-like (CT-L) inhibitor with IC50 of 27 nM with little effects on the other two major proteasome proteolytic activities, trypsin-like (T-L) and postglutamyl-peptide-hydrolysis-like (PGPH-L).	394.47	1401223-22-0	C22H26N4O3	Free Base	http://www.selleckchem.com/products/pi-1840.html	S7462
Losartan Potassium (DuP 753)	RAAS	Endocrinology & Hormones	Losartan is an angiotensin II receptor antagonist, competes with the binding of angiotensin II to AT1 receptors with IC50 of 20 nM.	462.01	124750-99-8	C22H23ClKN6O	Potassium	http://www.selleckchem.com/products/losartan-potassium.html	S1359
Candesartan	RAAS	Endocrinology & Hormones	Candesartan is an angiotensin II receptor antagonist with IC50 of 0.26 nM.	440.45	139481-59-7	C24H20N6O3	Free Base	http://www.selleckchem.com/products/Candesartan(Atacand).html	S1578
Enalaprilat Dihydrate	RAAS	Endocrinology & Hormones	Enalaprilat is an angiotensin-converting enzyme (ACE) inhibitor with IC50 of 1.94 nM.	348.4	84680-54-6	C18H28N2O7	Dihydrate	http://www.selleckchem.com/products/Enalaprilat.html	S1657
Captopril	RAAS	Endocrinology & Hormones	Captopril is an angiotensin-converting enzyme (ACE) inhibitor with IC50 of 6 nM.	217.29	62571-86-2	C9H15NO3S	Free Base	http://www.selleckchem.com/products/captopril-capoten.html	S2051
Imidapril HCl	RAAS	Endocrinology & Hormones	Imidapril HCl is a angiotensin-converting enzyme (ACE) inhibitor with IC50 of 2.6 nM, used for the treatment of hypertension.	441.91	89371-37-9	C20H27N3O6	Free Base	http://www.selleckchem.com/products/imidapril-tanatril.html	S2109
EHop-016	Rac	Cell Cycle	EHop-016 is a specific Rac GTPase inhibitor with IC50 of 1.1 μM for Rac1, equally potent inhibition for Rac3.	430.55	1380432-32-5	C25H30N6O	Free Base	http://www.selleckchem.com/products/ehop-016.html	S7319
NSC 23766	Rac	Cell Cycle	NSC 23766 is an inhibitor of Rac GTPase targeting Rac activation by guanine nucleotide exchange factors (GEFs) with IC50 of ~50 μM; does not inhibit the closely related targets, Cdc42 or RhoA.	530.96	1177865-17-6	C24H38Cl3N7	trihydrochloride	http://www.selleckchem.com/products/nsc-23766.html	S8031
Vemurafenib (PLX4032, RG7204)	Raf	MAPK	Vemurafenib (PLX4032, RG7204) is a novel and potent inhibitor of B-RafV600E with IC50 of 31 nM.	489.92	918504-65-1	C23H18ClF2N3O3S	Free Base	http://www.selleckchem.com/products/PLX-4032.html	S1267
Dabrafenib (GSK2118436)	Raf	MAPK	Dabrafenib (GSK2118436) is a mutant BRAFV600 specific inhibitor with IC50 of 0.8 nM, with 4- and 6-fold less potency against B-Raf(wt) and c-Raf, respectively. Phase 3.	519.56	1195765-45-7	C23H20F3N5O2S2	Free Base	http://www.selleckchem.com/products/dabrafenib-gsk2118436a.html	S2807
MLN2480	Raf	MAPK	MLN2480 is an oral, selective pan-Raf kinase inhibitor in chinical trials.	506.29	1096708-71-2	C17H12Cl2F3N7O2S	Free Base	http://selleckchem.com/products/mln2480.html	S7121
Sorafenib	Raf	MAPK	Sorafenib is a multikinase inhibitor of Raf-1, B-Raf and VEGFR-2 with IC50 of 6 nM, 22 nM and 90 nM, respectively.	464.82	284461-73-0	C21H16ClF3N4O3	Free Base	http://www.selleckchem.com/products/sorafenib.html	S7397
PLX7904	Raf	MAPK	PLX7904, also known as PB04, is a potent and selective paradox-breaker RAF inhibitor. It is able to efficiently inhibit activation of ERK1/2 in mutant BRAF melanoma cells but does not hyperactivate ERK1/2 in mutant RAS-expressing cells.	512.53	1393465-84-3	C24H22F2N6O3S	Free Base	http://selleckchem.com/products/plx7904.html	S7964
Stavudine (d4T)	Reverse Transcriptase	Microbiology	Stavudine is a nucleoside analog reverse transcriptase inhibitor (NARTI) active against HIV.	224.21	3056-17-5	C10H12N2O4	Free Base	http://www.selleckchem.com/products/Stavudine.html	S1398
ML141	Rho	Cell Cycle	ML141 is a potent, selective and reversible non-competitive inhibitor of Rho family GTPase <b>cdc42</b> with <b>IC50</b> of 200 nM.	407.49	71203-35-5	C22H21N3O3S	Free Base	http://www.selleckchem.com/products/ml141.html	S7686
Thiazovivin	ROCK	Cell Cycle	Thiazovivin (Tzv) is a novel ROCK inhibitor with IC50 of 0.5 μM, promotes hESC survival after single-cell dissociation.	311.36	1226056-71-8	C15H13N5OS	Free Base	http://www.selleckchem.com/products/Thiazovivin.html	S1459
GSK429286A	ROCK	Cell Cycle	GSK429286A is a selective inhibitor of ROCK1 and ROCK2 with IC50 of 14 nM and 63 nM, respectively.	432.37	864082-47-3	C21H16F4N4O2	Free Base	http://www.selleckchem.com/products/GSK429286A.html	S1474
RKI-1447	ROCK	Cell Cycle	RKI-1447 is a potent inhibitor of ROCK1 and ROCK2, with IC50 of 14.5 nM and 6.2 nM, respectively, has anti-invasive and antitumor activities.	326.37	1342278-01-6	C16H14N4O2S	Free Base	http://www.selleckchem.com/products/rki-1447.html	S7195
KD025 (SLx-2119)	ROCK	Cell Cycle	KD025 is an orally available, and selective ROCK2 inhibitor with IC50 and Ki of 60 nM and 41 nM, respectively. Phase 2.	452.51	911417-87-3	C26H24N6O2	Free Base	http://selleckchem.com/products/kd025-(slx-2119).html	S7936
ABC294640	S1P Receptor	GPCR & G Protein	ABC294640 is an orally bioavailable and selective <b>sphingosine kinase-2 (SphK2)</b> inhibitor with <b>IC50</b> of approximately 60 μM. Phase 1/2.	380.91	915385-81-8	C23H25ClN2O	Free Base	http://www.selleckchem.com/products/abc294640.html	S7174
Ozanimod (RPC1063)	S1P Receptor	GPCR & G Protein	Ozanimod (RPC1063) is a selective oral S1P Receptor 1 modulator. Phase 3.	404.46	1306760-87-1	C23H24N4O3	Free Base	http://selleckchem.com/products/ozanimod-rpc1063.html	S7952
Ponesimod	S1P Receptor	GPCR & G Protein	Ponesimod(ACT-128800) is an orally active, selective sphingosine-1-phosphate receptor 1 (S1P1) immunomodulator with EC50 of 5.7 nM.	460.97	854107-55-4	C23H25ClN2O4S	Free Base	http://selleckchem.com/products/ponesimod-act-128800.html	S8241
Fingolimod (FTY720) HCl	S1P Receptor, Bcr-Abl, PKC	GPCR & G Protein	Fingolimod (FTY720) is a S1P antagonist with IC50 of 0.033 nM.	343.9	162359-56-0	C19H34ClNO2	Hydrochloride	http://www.selleckchem.com/products/FTY720.html	S5002
H 89 2HCl	S6 Kinase	PI3K/Akt/mTOR	H 89 2HCl is a potent PKA inhibitor with Ki of 48 nM, 10-fold selective for PKA than PKG, greater than 500-fold selectivity than PKC, MLCK, calmodulin kinase II and casein kinase I/II.	519.28	130964-39-5	C20H22BrCl2N3O2S	2HCl	http://www.selleckchem.com/products/H-89-dihydrochloride.html	S1582
PF-4708671	S6 Kinase	PI3K/Akt/mTOR	PF-4708671 is a cell-permeable inhibitor of p70 ribosomal S6 kinase (S6K1 isoform) with Ki/IC50 of 20 nM/160 nM, 400-fold greater selectivity for S6K1 than S6K2, and 4- and >20-fold selectivity for S6K1 than MSK1 and RSK1/2, respectively. First S6K1-specific inhibitor to be reported.	390.41	1255517-76-0	C19H21F3N6	Free Base	http://www.selleckchem.com/products/pf-4708671.html	S2163
BI-D1870	S6 Kinase	PI3K/Akt/mTOR	BI-D1870 is an ATP-competitive inhibitor of S6 ribosome for RSK1/2/3/4 with IC50 of 31 nM/24 nM/18 nM/15 nM, respectively; 10- to 100-fold selectivity for RSK than MST2, GSK-3β, MARK3, CK1 and Aurora B.	391.42	501437-28-1	C19H23F2N5O2	Free Base	http://www.selleckchem.com/products/bi-d1870.html	S2843
LY2584702 Tosylate	S6 Kinase	PI3K/Akt/mTOR	LY2584702 Tosylate is a selective, ATP-competitive <B>p70S6K</b> inhibitor with IC50 of 4 nM. Phase 1.	617.62	1082949-68-5	C28H27F4N7O3S	Free Base	http://www.selleckchem.com/products/ly2584702-tosylate.html	S7704
Sivelestat (ONO-5046)	Serine proteases	Proteases	Sivelestat is a potent and selective inhibitor of neutrophil elastase with IC50</B> of 44nM. It almost shows no activity at a range of other proteases.	434.46	127373-66-4	C20H22N2O7S	Free Base	http://selleckchem.com/products/sivelestat-ono-5046.html	S8136
Dapagliflozin	SGLT	GPCR & G Protein	Dapagliflozin is a potent and selective hSGLT2 inhibitor with EC50 of 1.1 nM, exhibiting 1200-fold selectivity over hSGLT1. Phase 3.	408.87	461432-26-8	C21H25ClO6	Free Base	http://www.selleckchem.com/products/Dapagliflozin.html	S1548
Canagliflozin	SGLT	GPCR & G Protein	Canagliflozin is a highly potent and selective SGLT2 inhibitor for hSGLT2 with IC50 of 2.2 nM, exhibits 413-fold selectivity over hSGLT1.	444.52	842133-18-0	C24H25FO5S	Free Base	http://www.selleckchem.com/products/canagliflozin.html	S2760
Empagliflozin (BI 10773)	SGLT	GPCR & G Protein	Empagliflozin (BI-10773) is a potent and selective SGLT-2 inhibitor with IC50 of 3.1 nM, exhibits >300-fold selectivity over SGLT-1, 4, 5 and 6. Phase 3.	450.91	864070-44-0	C23H27ClO7	Free Base	http://www.selleckchem.com/products/empagliflozin-bi10773.html	S8022
AGK2	Sirtuin	Cytoskeletal Signaling	AGK2 is a potent, and selective <b>SIRT2</b> inhibitor with <b>IC50</b> of 3.5 μM.	434.27	304896-28-4	C23H13Cl2N3O2	Free Base	http://www.selleckchem.com/products/agk2.html	S7577
Splitomicin	Sirtuin	Cytoskeletal Signaling	Splitomicin is a selective <b>NAD(+)-dependent histone deacetylase Sir2p</b> inhibitor with <b>IC50</b> of 60 μM, showing a higher activity in a cell-based assay.	198.22	5690-03-9	C13H10O2	Free Base	http://www.selleckchem.com/products/splitomicin.html	S7593
EX 527 (Selisistat)	Sirtuin	Epigenetics	EX 527 is a potent and selective SIRT1 inhibitor with IC50 of 38 nM, exhibits >200-fold selectivity against SIRT2 and SIRT3.	248.71	49843-98-3	C13H13ClN2O	Free Base	http://www.selleckchem.com/products/EX-527.html	S1541
Sirtinol	Sirtuin	Epigenetics	Sirtinol is a specific SIRT1 and SIRT2 inhibitor with IC50 of 131 μM and 38 μM, respectively.	394.47	410536-97-9	C26H22N2O2	Free Base	http://www.selleckchem.com/products/sirtinol.html	S2804
SirReal2	Sirtuin	Epigenetics	SirReal2 is a potent and selective <b>Sirt2</b> inhibitor with <b>IC50</b> of 140 nM.	420.55	709002-46-0	C22H20N4OS2	Free Base	http://www.selleck.cn/products/sirreal2.html	S7845
SRT1720	Sirtuin	Others	SRT1720 is a selective SIRT1 activator with EC50 of 0.16 μM, but is >230-fold less potent for SIRT2 and SIRT3.	506.02	1001645-58-4	C25H24ClN7OS	Hydrochloride	http://www.selleckchem.com/products/SRT1720.html	S1129
LDE225 (NVP-LDE225,Erismodegib)	Smoothened	Stem Cells & Wnt	LDE225 (NVP-LDE225) is a Smoothened (Smo) antagonist, inhibiting Hedgehog (Hh) signaling with IC50 of 1.3 nM (mouse) and 2.5 nM (human), respectively. Phase 3.	485.5	956697-53-3	C26H26F3N3O3	Free Base	http://www.selleckchem.com/products/LDE225(NVP-LDE225).html	S2151
SANT-1	Smoothened	Stem Cells & Wnt	SANT-1 directly binds to Smoothened (Smo) receptor with Kd of 1.2 nM and inhibits Smo agonist effects with IC50 of 20 nM.	373.49	304909-07-7	C23H27N5	Free Base	http://www.selleckchem.com/products/sant-1.html	S7092
Oxcarbazepine	Sodium Channel	Transmembrane Transporters	Oxcarbazepine inhibits the binding of [3H]BTX to sodium channels with IC50 of 160 μM and also inhibits the influx of 22Na+ into rat brain synaptosomes with IC50 about 100 μM.	252.27	28721-07-5	C15H12N2O2	Free Base	http://www.selleckchem.com/products/Oxcarbazepine.html	S1391
Vinpocetine	Sodium Channel	Transmembrane Transporters	Vinpocetine is a selective inhibitor of voltage-sensitive sodium channel for the treatment of stroke, vascular dementia and Alzheimer's disease.	350.45	42971-09-5	C22H26N2O2	Free Base	http://selleckchem.com/products/vinpocetine-cavinton.html	S2110
Ouabain	Sodium Channel	Transmembrane Transporters	Ouabain is a selective Na+/K+, -ATPase inhibitor, binds to α2 /α3 subunit with Ki of 41 nM/15 nM.	728.77	630-60-4	C29H60O20	Free Base	http://www.selleckchem.com/products/ouabain.html	S4016
Triamterene	Sodium Channel	Transmembrane Transporters	Triamterene blocks epithelial Na+ channel (ENaC) in a voltage-dependent manner with IC50 of 4.5 μM.	253.26	396-01-0	C12H11N7	Free Base	http://www.selleckchem.com/products/triamterene.html	S4080
SKI II	sphingosine kinase (SphK)	GPCR & G Protein	SKI II is a highly selective and non ATP-competitive S1P receptor inhibitor with IC50 of 0.5 μM, while exhibits no inhibitory on other kinases including PI3K, PKCα and ERK2.	302.78	312636-16-1	C15H11ClN2OS	Free Base	http://www.selleckchem.com/products/ski-ii.html	S7176
Bosutinib (SKI-606)	Src	Angiogenesis	Bosutinib (SKI-606) is a novel, dual Src/Abl inhibitor with IC50 of 1.2 nM and 1 nM, respectively.	530.45	380843-75-4	C26H29Cl2N5O3	Free Base	http://www.selleckchem.com/products/Bosutinib.html	S1014
Ibrutinib (PCI-32765)	Src	Angiogenesis	Ibrutinib is a potent and highly selective Btk inhibitor with IC50 of 0.5 nM, modestly potent to Bmx, CSK, FGR, BRK, HCK, less potent to EGFR, Yes, ErbB2, JAK3, etc.	440.5	936563-96-1	C25H24N6O2	Free Base	http://www.selleckchem.com/products/pci-32765.html	S2680
KX2-391	Src	Angiogenesis	KX2-391 (KX01), the first clinical Src inhibitor (peptidomimetic class) that targets the peptide substrate site of Src, with GI50 of 9-60 nM in cancer cell lines. Phase 1/2.	431.53	897016-82-9	C26H29N3O3	Free Base	http://www.selleckchem.com/products/kx2-391.html	S2700
PP2	Src	Angiogenesis	PP2 is Src family kinase inhibitor, potently inhibits Lck/Fyn with IC50 of 4 nM/5 nM, ~100-fold less potent to EGFR, inactive for ZAP-70, JAK2 and PKA.	301.77	172889-27-9	C15H16ClN5	Free Base	https://www.selleckchem.com/products/pp2.html	S7008
Cryptotanshinone	STAT	JAK/STAT	Cryptotanshinone (CPT) is a STAT3 inhibitor with IC50 of 4.6 μM, strongly inhibits phosphorylation of STAT3 Tyr705, with a small effect on STAT3 Ser727, but none against STAT1 nor STAT5.	296.36	35825-57-1	C19H20O3	Free Base	http://www.selleckchem.com/products/Cryptotanshinone.html	S2285
Stattic	STAT	JAK/STAT	Stattic, the first nonpeptidic small molecule, potently inhibits STAT3 activation and nuclear translocation with IC50 of 5.1 μM, highly selectivity over STAT1.	211.19	19983-44-9	C8H5NO4S	Free Base	http://www.selleckchem.com/products/stattic.html	S7024
HO-3867	STAT	JAK/STAT	HO-3867, an analog of curcumin, is a selective STAT3 inhibitor.	464.55	1172133-28-6	C28H30F2N2O2	Free Base	http://www.selleckchem.com/products/ho-3867.html	S7501
STA-21	STAT	JAK/STAT	STA-21 is a selective STAT3 inhibitor.	306.31	111540-00-2	C19H14O4	Free Base	http://selleckchem.com/products/sta-21.html	S7951
S3I-201	STAT	Others	S3I-201 shows potent inhibition of STAT3 DNA-binding activity with IC50 of 86 μM, and low activity towards STAT1 and STAT5.	365.36	501919-59-1	C16H15NO7S	Free Base	http://www.selleckchem.com/products/S31-201.html	S1155
Aprepitant	Substance P	Others	Aprepitant is a potent and selective neurokinin-1 receptor antagonist.	534.43	170729-80-3	C23H21F7N4O3	Free Base	http://www.selleckchem.com/products/Aprepitant.html	S1189
YM155 (Sepantronium Bromide)	Survivin	Others	YM155 is a potent survivin suppressant by inhibiting Survivin promoter activity with IC50 of 0.54 nM; does not significantly inhibit SV40 promoter activity, but is observed to slightly inhibit the interaction of Survivin with XIAP. Phase 1/2.	443.29	781661-94-7	C20H19BrN4O3	Free Base	http://www.selleckchem.com/products/YM155.html	S1130
Fostamatinib (R788)	Syk	Angiogenesis	Fostamatinib (R788), a prodrug of the active metabolite R406, is a Syk inhibitor with IC50 of 41 nM, strongly inhibits Syk but not Lyn, 5-fold less potent to Flt3. Phase 2.	580.46	901119-35-5	C23H26FN6O9P	Free Base	http://www.selleckchem.com/products/R7935788-Fostamatinib.html	S2625
Piceatannol	Syk	Angiogenesis	Piceatannol, a natural stilbene, is a selective Syk inhibitor and ~10-fold selectivity versus Lyn.	244.24	10083-24-6	C14H12O4	Free Base	http://www.selleckchem.com/products/piceatannol.html	S3026
PRT-060318	Syk	Angiogenesis	PRT-060318 (PRT318) is a novel selective inhibitor of the Syk tyrosine kinase, as an approach to HIT treatment.	449.81	1194961-19-7 (free base)	C18H27Cl3N6O	Salt	http://selleckchem.com/products/prt-060318-prt318-3hcl.html	S7738
PRT062607 (P505-15, BIIB057) HCl	Syk	Angiogenesis	PRT062607 (P505-15) HCl is a novel, highly selective Syk inhibitor with IC50 of 1 nM, >80-fold selective for Syk than Fgr, Lyn, FAK, Pyk2 and Zap70.	429.91	1370261-97-4,1370261-96-3(free base)	C19H24ClN9O	HCl	https://www.selleckchem.com/products/prt062607-p505-15-hcl.html	S8032
BIBR 1532	Telomerase	DNA Damage	BIBR 1532 is a potent, selective, non-competitive telomerase inhibitor with IC50 of 100 nM.	331.36	321674-73-1	C21H17NO3	Free Base	http://www.selleckchem.com/products/BIBR1532.html	S1186
Costunolide	Telomerase	DNA Damage	Costunolide, a natural sesquiterpene compound with multiple biological activities; inhibits FPTase with IC50 of 20 μM, also inhibits telomerase with IC50 of 65-90 μM.	232.32	553-21-9	C15H20O2	Free Base	http://www.selleckchem.com/products/Costunolide.html	S1319
Daunorubicin HCl	Telomerase	DNA Damage	Daunorubicin HCl inhibits both DNA and RNA synthesis and inhibits DNA synthesis with Ki of 0.02 μM.	563.98	23541-50-6	C27H30ClNO10	Hydrochloride	http://www.selleckchem.com/products/daunorubicin-hcl-daunomycin-hcl.html	S3035
SB431542	TGF-beta/Smad	Others	SB431542 is a potent and selective inhibitor of ALK5 with IC50 of 94 nM, 100-fold more selective for ALK5 than p38 MAPK and other kinases.	384.39	301836-41-9	C22H16N4O3	Free Base	http://www.selleckchem.com/products/SB-431542.html	S1067
LY2157299	TGF-beta/Smad	TGF-beta/Smad	LY2157299 is a potent TGFβ receptor I (TβRI) inhibitor with IC50 of 56 nM. Phase 2.	369.42	700874-72-2	C22H19N5O	Free Base	http://www.selleckchem.com/products/ly2157299.html	S2230
DMH1	TGF-beta/Smad	TGF-beta/Smad	DMH1 is a selective BMP receptor inhibitor with IC50 of 107.9 nM for ALK2, exhibiting no inhibition on AMPK, ALK5, KDR (VEGFR-2) or PDGFR.	380.44	1206711-16-1	C24H20N4O	Free Base	http://www.selleckchem.com/products/dmh1.html	S7146
LDN-212854	TGF-beta/Smad	TGF-beta/Smad	LDN-212854 is a potent and selective BMP receptor inhibitor with IC50 of 1.3 nM for ALK2, about 2-, 66-, 1641-, and 7135-fold selectivity over ALK1, ALK3, ALK4, and ALK5, respectively.	406.48	1432597-26-6	C25H22N6	Free Base	http://www.selleckchem.com/products/ldn-212854.html	S7147
ML347	TGF-beta/Smad	TGF-beta/Smad	ML347 is a selective BMP receptor inhibitor with IC50 of 32 nM for ALK2, >300-fold selectivity over ALK3. Also inhibits ALK1 activity with IC50 of 46 nM.	352.39	1062368-49-3	C22H16N4O	Free Base	http://www.selleckchem.com/products/ml347.html	S7148
RepSox	TGF-beta/Smad	TGF-beta/Smad	RepSox is a potent and selective inhibitor of the TGFβR-1/ALK5 with IC50 of 23 nM and 4 nM for ATP binding to ALK5 and ALK5 autophosphorylation, respectively.	287.32	446859-33-2	C17H13N5	Free Base	http://www.selleckchem.com/products/repsox.html	S7223
SD-208	TGF-beta/Smad	TGF-beta/Smad	SD-208 is a selective <b>TGF-βRI (ALK5)</b> inhibitor with <b>IC50</b> of 48 nM, >100-fold selectivity over TGF-βRII.	352.75	627536-09-8	C17H10ClFN6	Free Base	http://www.selleckchem.com/products/sd-208.html	S7624
LDN-193189 HCl	TGF-beta/Smad	TGF-beta/Smad	LDN193189 HCl is the hydrochloride salt of LDN193189, which is a selective BMP signaling inhibitor, and inhibits the transcriptional activity of the BMP type I receptors ALK2 and ALK3 with IC50 of 5 nM and 30 nM in C2C12 cell lines, respectively, 200-fold selectivity for BMP versus TGF-β.	442.94	1062368-62-0	C25H23ClN6	HCl	http://selleckchem.com/products/ldn-193189-HCl.html	S7507
Tie2 kinase inhibitor	Tie-2	Protein Tyrosine Kinase	Tie2 kinase inhibitor is an optimized compound of SB-203580, selective to Tie2 with IC50 of 0.25 μM, 200-fold more potent than p38.	439.53	948557-43-5	C26H21N3O2S	Free Base	http://www.selleckchem.com/products/Tie2-kinase-inhibitor.html	S1577
Lenalidomide (CC-5013)	TNF-alpha	Apoptosis	Lenalidomide (CC-5013) is a TNF-α secretion inhibitor with IC50 of 13 nM.	259.26	191732-72-6	C13H13N3O3	Free Base	http://www.selleckchem.com/products/Lenalidomide.html	S1029
Necrostatin-1	TNF-alpha	Apoptosis	Necrostatin-1 is a specific RIP1 inhibitor and inhibits TNF-α-induced necroptosis with EC50 of 490 nM.	259.33	4311-88-0	C13H13N3OS	Free Base	http://www.selleckchem.com/products/necrostatin-1.html	S8037
Pomalidomide	TNF-alpha, COX	Apoptosis	Pomalidomide inhibits LPS-induced TNF-α release with IC50 of 13 nM.	273.24	19171-19-8	C13H11N3O4	Free Base	http://www.selleckchem.com/products/Pomalidomide(CC-4047).html	S1567
Irinotecan	Topoisomerase	DNA Damage	Irinotecan is a topoisomerase I inhibitor for LoVo cells and HT-29 cells with IC50 of 15.8 μM and 5.17 μM, respectively.	586.68	97682-44-5	C33H38N4O6	Free Base	http://www.selleckchem.com/products/Irinotecan.html	S1198
Irinotecan HCl Trihydrate	Topoisomerase	DNA Damage	Irinotecan prevents DNA from unwinding by inhibition of topoisomerase 1.	677.18	136572-09-3	C33H45ClN4O9	Hydrate	http://www.selleckchem.com/products/Irinotecan-Hcl-Trihydrate-Campto.html	S2217
SN-38	Topoisomerase	DNA Damage	SN-38 is an active metabolite of CPT-11, inhibits DNA topoisomerase I, DNA synthesis and causes frequent DNA single-strand breaks.	392.4	86639-52-3	C22H20N2O5	Free Base	http://www.selleckchem.com/products/sn-38.html	S4908
PF-04620110	Transferase	Metabolism	PF-04620110 is an orally active, selective and potent diglyceride acyltransferase-1 (DGAT1) inhibitor with IC50 of 19 nM.	396.44	1109276-89-2	C21H24N4O4	Free Base	http://www.selleckchem.com/products/pf-04620110.html	S7192
LB42708	Transferase	Metabolism	LB42708 is an orally active farnesyltransferase (FTase) inhibitor with IC50 of 0.8, 1.2, and 2.0 nM toward H-ras, N-ras, and K-ras, respectively.	555.46	226929-39-1	C30H27BrN4O2	Free Base	http://www.selleckchem.com/products/lb42708.html	S7467
GW441756	Trk Receptor	Protein Tyrosine Kinase	GW441756 is a potent, selective inhibitor of <b>TrkA</b> with <b>IC50</b> of 2 nM, with very little activity to c-Raf1 and CDK2.	275.3	504433-23-2	C17H13N3O	Free Base	http://www.selleckchem.com/products/gw-441756.html	S2891
GNF-5837	Trk receptor	Protein Tyrosine Kinase	GNF-5837 is a selective, and orally bioavailable pan-<b>TRK</b> inhibitor for TrkA, and TrkB with <b>IC50</b> of 8 nM, and 12 nM, respectively.	535.49	1033769-28-6	C28H21F4N5O2	Free Base	http://www.selleckchem.com/products/gnf-5837.html	S7519
7,8-Dihydroxyflavone	Trk receptor	Protein Tyrosine Kinase	7,8-Dihydroxyflavone acts as a potent and selective small-molecule agonist of the TrkB receptor (Kd ≈ 320 nM), the main signaling receptor of brain-derived neurotrophic factor (BDNF).	254.24	38183-03-8	C15H10O4	Free Base	http://selleckchem.com/products/7-8-dihydroxyflavone.html	S8319
SB705498	TRPV	Others	SB705498 is a TRPV1 antagonist for hTRPV1, antagonizes capsaicin, acid, and heat activation of TRPV1 with IC50 of 3 nM, 0.1 nM and 6 nM, shows a degree of voltage dependence, exhibits >100-fold selectivity for TRPV1 over TRPM8. Phase 2.	429.23	501951-42-4	C17H16BrF3N4O	Free Base	http://www.selleckchem.com/products/sb705498.html	S2773
AMG-517	TRPV	Others	AMG 517 is a potent and selective TRPV1 antagonist, antagonizes capsaicin, proton, and heat activation of TRPV1 with IC50 of 0.76 nM, 0.62 nM and 1.3 nM.	430.4	659730-32-2	C20H13F3N4O2S	Free Base	https://www.selleckchem.com/products/amg-517.html	S7115
SB366791	TRPV	Transmembrane Transporters	SB-366791 is a novel, potent, and selective, cinnamide TRPV1 antagonist.	287.74	472981-92-3	C16H14ClNO2	Free Base	http://selleckchem.com/products/sb366791.html	S8238
DMXAA (Vadimezan)	VDA	Angiogenesis	DMXAA (Vadimezan) is a vascular disrupting agents (VDA) and competitive inhibitor of DT-diaphorase with Ki of 20 μM and IC50 of 62.5 μM, respectively. Phase 3.	282.29	117570-53-3	C17H14O4	Free Base	http://www.selleckchem.com/products/DMXAA(ASA404).html	S1537
Apatinib	VEGFR	Protein Tyrosine Kinase	Apatinib is an orally bioavailable, selective VEGFR2 inhibitor with IC50 of 1 nM.	493.58	811803-05-1	C25H27N5O4S	Mesylate	http://www.selleckchem.com/products/Apatinib-YN968D1.html	S2221
SAR131675	VEGFR	Protein Tyrosine Kinase	SAR131675 is a VEGFR3 inhibitor with IC50/Ki of 23 nM/12 nM in cell-free assays, about 50- and 10-fold more selective for VEGFR3 than VEGFR1/2, little activity against Akt1, CDKs, PLK1, EGFR, IGF-1R, c-Met, Flt2 etc.	358.39	1433953-83-3	C18H22N4O4	Free Base	http://selleckchem.com/products/sar131675.html	S2842
ZM 306416	VEGFR	Protein Tyrosine Kinase	ZM 306416 is a VEGFR (Flt and KDR) inhibitor for VEGFR1 with IC50 of 0.33 μM, but also found to inhibit EGFR with IC50 of <10 nM.	333.74	690206-97-4	C16H13ClFN3O2	Free Base	http://www.selleckchem.com/products/zm-306416.html	S2897
SGI-7079	VEGFR	Protein Tyrosine Kinase	SGI-7079 ,a novel selective Axl inhibitor, inhibits tumor growth in a dose dependent manner and is a potential therapeutic target for overcoming EGFR inhibitor resistance.	455.53	1239875-86-5	C26H26FN7	Free Base	http://selleckchem.com/products/sgi-7079.html	S7847
MK-1775	Wee1	Cell Cycle	MK-1775 is a potent and selective Wee1 inhibitor with IC50 of 5.2 nM; hinders G2 DNA damage checkpoint. Phase 2.	500.6	955365-80-7	C27H32N8O2	Free Base	http://www.selleckchem.com/products/MK-1775.html	S1525
XAV-939	Wnt/beta-catenin	Stem Cells & Wnt	XAV-939 selectively inhibits Wnt/β-catenin-mediated transcription through tankyrase1/2 inhibition with IC50 of 11 nM/4 nM, regulates axin levels and does not affect CRE, NF-κB or TGF-β.	312.31	284028-89-3	C14H11F3N2OS	Free Base	http://www.selleckchem.com/products/XAV-939.html	S1180
ICG-001	Wnt/beta-catenin	Stem Cells & Wnt	ICG-001 antagonizes Wnt/β-catenin/TCF-mediated transcription and specifically binds to element-binding protein (CBP) with IC50 of 3 μM, but is not the related transcriptional coactivator p300.	548.63	780757-88-2	C33H32N4O4	Free Base	http://www.selleckchem.com/products/icg-001.html	S2662
Wnt-C59 (C59)	Wnt/beta-catenin	Stem Cells & Wnt	Wnt-C59 (C59) is a PORCN inhibitor for Wnt3A-mediated activation of a multimerized TCF-binding site driving luciferase with IC50 of 74 pM.	379.45	1243243-89-1	C25H21N3O	Free Base	http://www.selleckchem.com/products/wnt-c59-c59.html	S7037
