# Supplementary material for: Identification of TAZ-Dependent Breast Cancer Vulnerabilities Using a Chemical Genomics Screening Approach
Source: Front Cell Dev Biol. 2021 Jun 15;9:673374. doi: 10.3389/fcell.2021.673374 (PMC8239392; doi:10.3389/fcell.2021.673374)
Supplement: Supplementary file 4 [file Table_4.XLSX]

## Sheet: R_Drug Analysis-merge_0-reorder
Plate ID	Drug	Product Name	Target	Pathway	Information	TAZ INDEPENDENT (0.65 uM)	TAZ INDEPENDENT (1.25 uM)	TAZ INDEPENDENT (2.5 uM)	TAZ INDEPENDENT (5 uM)	TAZ INDEPENDENT (10 uM)	TAZ DEPENDENT (0.65 uM)	TAZ DEPENDENT (1.25 uM)	TAZ DEPENDENT (2.5 uM)	TAZ DEPENDENT (5 uM)	TAZ DEPENDENT (10 uM)
Control	Control	Control	Control	Control	Control	100	100	100	100	100	100	100	100	100	100
1000	S1036	PD0325901	MEK	DNA Damage	PD0325901 (PD325901) is selective and non ATP-competitive MEK inhibitor with IC50 of 0.33 nM, roughly 500-fold more potent than CI-1040 on phosphorylation of ERK1 and ERK2. Phase 1/2.	82	87	84	80	78	52	56	53	47	48
10000000	S1089	Refametinib (RDEA119, Bay 86-9766)	MEK	Others	Refametinib (RDEA119, Bay 86-9766) is a potent, ATP non-competitive and highly selective inhibitor of MEK1 and MEK2 with IC50 of 19 nM and 47 nM, respectively.	84	82	80	77	71	53	51	51	51	50
1C09	S1102	U0126-EtOH	MEK	Others	U0126-EtOH is a highly selective inhibitor of MEK1/2 with IC50 of 0.07 ?M/0.06 ?M, 100-fold higher affinity for ?N3-S218E/S222D MEK than PD098059.	95	94	89	84	79	99	94	84	70	67
2B02	S1116	Palbociclib (PD-0332991) HCl	CDK	Others	PD0332991 is a highly selective inhibitor of CDK4/6 with IC50 of 11 nM/16 nM. It shows no activity against CDK1/2/5, EGFR, FGFR, PDGFR, InsR, etc. Phase 2/3.	100	100	100	100	96	79	73	70	59	41
1G13	S1173	WZ4002	EGFR	Protein Tyrosine Kinase	WZ4002 is a novel, mutant-selective EGFR inhibitor for EGFR(L858R)/(T790M) with IC50 of 2 nM/8 nM; does not inhibit ERBB2 phosphorylation (T798I).	96	97	96	75	68	90	72	67	33	23
1A17	S1216	PFI-1 (PF-6405761)	Others	Epigenetics	PFI-1 is a selective BET (bromodomain-containing protein) inhibitor for BRD4 with IC50 of 0.22 ?M.	100	100	94	91	85	91	79	63	54	41
1D15	S2006	Pyrimethamine	NULL	Metabolism	Pyrimethamine is a dihydrofolate reductase(DHFR) inhibitor with an IC50 of 15.4 nM.	100	100	100	100	98	100	100	98	85	56
1G04	S2285	Cryptotanshinone	STAT	JAK/STAT	Cryptotanshinone (CPT) is a STAT3 inhibitor with IC50 of 4.6 ?M, strongly inhibits phosphorylation of STAT3 Tyr705, with a small effect on STAT3 Ser727, but none against STAT1 nor STAT5.	96	97	93	87	79	96	94	92	74	30
1M10	S2671	AS-252424	PI3K	PI3K/Akt/mTOR	AS-252424 is a novel, potent PI3K? inhibitor with IC50 of 30 nM with 30-fold selectivity for PI3K? than PI3K?, and low inhibitory activity towards PI3K?/?.	72	75	72	67	63	62	53	51	46	43
1C20	S2822	OC000459	GPR	Endocrinology & Hormones	OC000459 is a potent and selective D prostanoid receptor 2 (DP2) antagonist with IC50 of 13 nM.	90	94	90	77	55	90	82	69	57	33
1J04	S2922	Icotinib	EGFR	Protein Tyrosine Kinase	Icotinib is a potent and specific EGFR inhibitor with IC50 of 5 nM, including the EGFR, EGFR(L858R), EGFR(L861Q), EGFR(T790M) and EGFR(T790M, L858R). Phase 4.	100	100	100	100	96	100	100	100	89	34
1F16	S4921	MNS (3,4-Methylenedioxy-?-nitrostyrene, MDBN)	Others	Ubiquitin	MNS is a tyrosine kinases inhibitor, inhibits Syk, Src, p97 with IC50 of 2.5 ?M, 29.3 ?M and 1.7 ?M, respectively.	100	99	98	98	31	100	100	100	78	1
1J18	S7025	Embelin	IAP	Apoptosis	Embelin, a quinone isolated from the Japanese Ardisia herb, is an inhibitor of X-linked inhibitor of apoptosis (XIAP) with IC50 of 4.1 &mu;M.	89	90	90	89	82	89	84	75	57	28
1L18	S7029	AZD2461	PARP	DNA Damage	AZD2461 is a novel PARP inhibitor with low affinity for Pgp than Olaparib. Phase 1.	94	89	91	83	78	94	91	94	70	56
1P20	S7079	SGC 0946	Histone Methyltransferase	Epigenetics	SGC 0946 is a highly potent and selective DOT1L methyltransferase inhibitor with IC50 of 0.3 nM, is inactive against a panel of 12 PMTs and DNMT1.	94	89	79	34	1	89	83	78	63	-1
1L22	S7102	VE-822	ATM/ATR	PI3K/Akt/mTOR	VE-822 is an ATR inhibitor with IC50 of 19 nM.	96	87	81	75	69	55	37	29	23	20
2I13	S7289	PFK15	6-phosphofructo-2-kinase (PFKFB3)	Others	PFK15 is a potent and selective 6-phosphofructo-2-kinase (PFKFB3) with IC50 of 207 nM.	98	98	99	95	97	100	100	81	47	31
2M13	S7294	PFI-2	Histone Methyltransferase		"PFI-2 is a potent, selective, and cell-active <b>lysine methyltransferase SETD7</b> inhibitor with <b>K<sub>i (app)</sub></b> and <b>IC50</b> of 0.33 nM and 2 nM, 1000-fold selectivity over other methyltransferases and other non-epigenetic targets.	97	94	92	85	78	94	85	72	56	46
2O15	S7330	6H05	K-Ras(G12C)		"6H05 is a selective, and allosteric inhibitor of oncogenic K-Ras(G12C).	99	98	92	88	83	96	91	89	66	23
2G17	S7339	AZD3965	others	Others	AZD3965 is a potent, selective and orally available monocarboxylate transporter 1 (MCT1) inhibitor with a binding affinity of 1.6 nM, 6-fold selective over MCT2. Phase 1.	92	87	91	60	47	54	49	45	39	32
2C21	S7397	Sorafenib	Raf	MAPK	Sorafenib is a multikinase inhibitor of Raf-1, B-Raf and VEGFR-2 with IC50 of 6 nM, 22 nM and 90 nM, respectively.	100	99	100	98	93	100	98	92	84	72
2F01	S7449	CRT0044876	DNA/RNA Synthesis	DNA Damage	CRT0044876 is a potent and selective APE1 inhibitor with IC50 of ~3 ?M.	100	100	100	97	70	100	98	87	47	2
1F11	S7612	PX-478 2HCl	HIF		"PX-478 2HCl is an orally active, and selective <b>hypoxia-inducible factor-1? (HIF-1?)</b> inhibitor. Phase 1.	95	93	85	55	33	89	79	71	52	42
2H15	S7697	LY2409881	I?B/IKK		"LY2409881 is a potent and selective <b>IKK2</b> inhibitor with <b>IC50</b> of 30 nM, >10-fold selectivity over IKK1 and other common kinases.	94	91	87	84	80	74	67	63	63	65
2D21	S7844	Cyclo(RGDyK)	Integrin		"Cyclo(RGDyK) is a potent and selective <b>?V?3 integrin</b> inhibitor with <b>IC50</b> of 20 nM.	98	94	86	74	65	99	86	59	49	27
2M02	S7931	STF-31	Others		"STF-31 is a selective glucose transporter <b>GLUT1</b> inhibitor.	99	100	100	97	96	100	100	100	99	98
2G08	S8031	NSC 23766	Rac	Cell Cycle	NSC 23766 is an inhibitor of Rac GTPase targeting Rac activation by guanine nucleotide exchange factors (GEFs) with IC50 of ~50 ?M; does not inhibit the closely related targets, Cdc42 or RhoA.	80	81	90	80	73	50	54	47	50	34
2I10	S8056	Lomeguatrib	DNA Methyltransferase	Epigenetics	Lomeguatrib is a potent inhibitor of O6-alkylguanine-DNA-alkyltransferase with IC50 of 5 nM.	96	98	97	100	85	96	91	90	55	36
2G14	S8167	AMG 337	c-Met	Protein Tyrosine Kinase	AMG 337 is an oral, small molecule, ATP-competitive, highly selective inhibitor of the MET receptor.	97	97	100	97	100	88	84	77	68	60
2e+16	S8209	HLCL-61	Histone Methyltransferase	Epigenetics	HLCL-61 hydrochloride is a potent and selective PRMT5 inhibitor for the treatment of acute myeloid leukemia.	97	99	100	100	95	100	100	100	89	59
